# Supplementary material for: A general method for E -selective olefination of acylsilanes with isocyanides via silver catalysis
Source: Royal Society of Chemistry journal article supplement (doi:10.1039/d4qo01528b), 2024-01-01

## *Supporting Information*

# **The General Method for *E*-Selective Olefination of Acylsilanes with Isocyanides via Silver Catalysis**

Xiu-Xia Liang,<sup>†</sup> Dan-Ni Yang,<sup>†</sup> Xiao-Hui Yan, Peng Wang,<sup>\*</sup> and Man-Yi Han<sup>\*</sup>

Key Laboratory of Green and Precise Synthetic Chemistry and Applications, Ministry of Education; Anhui Provincial Key Laboratory of Synthetic Chemistry and Applications; College of Chemistry and Materials Science, Huaibei Normal University, Huaibei, Anhui 235000, People's Republic of China

<sup>†</sup>These authors contributed equally to this work.

<sup>\*</sup>E-mail: hanmy10@126.com; wplscut@126.com

## *Table of Contents*

|                                                                                                                                  |     |
|----------------------------------------------------------------------------------------------------------------------------------|-----|
| 1. General information.....                                                                                                      | S3  |
| 2. The reoptimization of the reaction conditions with acylsilanes.....                                                           | S4  |
| 3. The optimization of the reaction conditions with 1-methylisatin.....                                                          | S6  |
| 4. Representative procedure for silver-catalyzed olefination reaction of alkynyl<br>acylsilanes with ethyl isocyanoacetates..... | S7  |
| 5. Control experiments.....                                                                                                      | S33 |
| 6. Gram-scale synthesis and further chemical transformations.....                                                                | S36 |
| 7. The crystal structure and data of <b>3j</b> , <b>4l</b> and <b>6</b> .....                                                    | S40 |
| 8. DFT calculation results.....                                                                                                  | S43 |
| 9. Reference.....                                                                                                                | S73 |
| 10. <sup>1</sup> H and <sup>13</sup> C NMR spectra of the products.....                                                          | S75 |

## 1. General information

Chemicals and analytical grade solvents were purchased from commercial suppliers and used without further purification unless otherwise stated. Flash column chromatography was performed on silica gels (200–300 mesh). General  $^1\text{H}$  and  $^{13}\text{C}$  NMR spectra were recorded on a Bruker 600 MHz NMR spectrometer. Chemical shifts were reported in ppm and the coupling constants  $J$  are given in Hz. Tetramethylsilane (TMS,  $\delta = 0.00$  ppm) or  $\text{CHCl}_3$  ( $\delta = 7.26$  ppm) served as an internal standard for  $^1\text{H}$  NMR; while  $\text{CDCl}_3$  was used as an internal standard ( $\delta = 77.0$  ppm) for  $^{13}\text{C}$  NMR. HRMS data were obtained on a Bruker Apex II mass instrument (ESI) or an Agilent Technologies 6540 UHD Accurate-Mass Q-TOF LC/MS (ESI). X-ray crystallography analysis was performed on PANalytical X'Pert PRO MPD system (PW3040/60).

Acylsilanes were prepared according to the literature procedure.<sup>[1-4]</sup> Isocyanides was purchased from commercial suppliers.

## 2. The reoptimization of the reaction conditions with acylsilanes

**Table S1.** Optimization of the reaction conditions for catalyst loading<sup>a</sup>

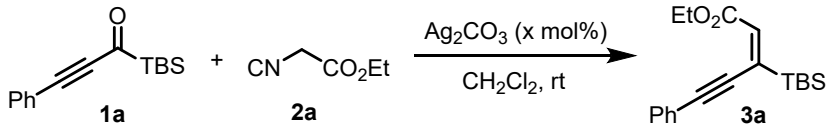

| Entry | Ag <sub>2</sub> CO <sub>3</sub> (x mol%) | <b>2a</b> (x equiv.) | Time (h) | Yield (%) <sup>b</sup> | <i>E/Z</i> <sup>c</sup> |
|-------|------------------------------------------|----------------------|----------|------------------------|-------------------------|
| 1     | 30                                       | 1.2                  | 48       | 82                     | 17:1                    |
| 2     | 15                                       | 1.5                  | 72       | 71                     | -                       |
| 3     | 15                                       | 2.0                  | 72       | 76                     | -                       |
| 4     | 15                                       | 3.0                  | 72       | 80                     | 17:1                    |
| 5     | 10                                       | 3.0                  | 72       | 76                     | 17:1                    |

<sup>a</sup>Reactions were performed with 0.20 mmol of alkynyl acylsilanes **1a**, isocynoacetate **2a** (x equiv.) and Ag<sub>2</sub>CO<sub>3</sub> (x mol%) in 2 mL CH<sub>2</sub>Cl<sub>2</sub> at room temperature. <sup>b</sup>Isolated yield after purification by column chromatography.

<sup>c</sup>Determined by <sup>1</sup>H NMR analysis of crude mixture.

**Table S2.** Optimization of the reaction conditions for benzyl isonitrile<sup>a</sup>

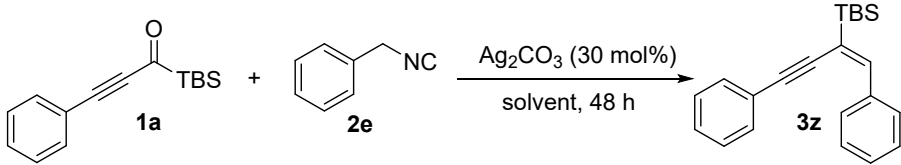

| Entry | Solvent                         | Temperature | Yield (%) <sup>b</sup> | <i>E/Z</i> <sup>c</sup> |
|-------|---------------------------------|-------------|------------------------|-------------------------|
| 1     | CH <sub>2</sub> Cl <sub>2</sub> | rt          | 38                     | 4:1                     |
| 2     | THF                             | rt          | 41                     | 3:1                     |
| 3     | 1,4-dioxane                     | rt          | 39                     | 3:1                     |
| 4     | CH <sub>3</sub> CN              | rt          | 57                     | 5:1                     |
| 5     | EtOAc                           | rt          | 45                     | 4:1                     |
| 6     | DMSO                            | rt          | 53                     | 4:1                     |
| 7     | CH <sub>3</sub> CN              | 40 °C       | 54                     | 6:1                     |
| 8     | CH <sub>3</sub> CN <sup>d</sup> | 40 °C       | 62                     | 6:1                     |

<sup>a</sup>Reactions were performed with 0.20 mmol of alkynyl acylsilanes **1**, 0.24 mmol of benzyl isonitrile **2e**, and 30 mol% of Ag<sub>2</sub>CO<sub>3</sub> in 2 mL solvent at room temperature. <sup>b</sup>Isolated yield after purification by column chromatography.

<sup>c</sup>Determined by <sup>1</sup>H NMR analysis of crude mixture. <sup>d</sup>1.5 eq. benzyl isonitrile was used.

**Table S3.** Optimization of the reaction conditions for silyl glyoxylates<sup>a</sup>
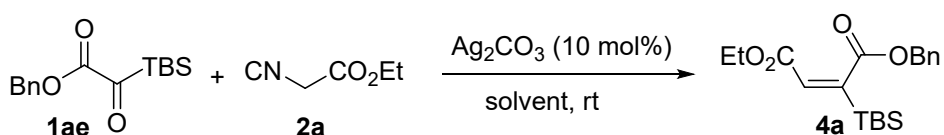

| Entry | Solvent                         | Time (h) | Yield (%) <sup>b</sup> | <i>E/Z</i> <sup>c</sup> |
|-------|---------------------------------|----------|------------------------|-------------------------|
| 1     | CH <sub>2</sub> Cl <sub>2</sub> | 7        | 38                     | 10:1                    |
| 2     | THF                             | 4        | 86                     | 16:1                    |
| 3     | CH <sub>3</sub> CN              | 12       | 49                     | 10:1                    |
| 4     | acetone                         | 9        | 77                     | 13:1                    |
| 5     | CH <sub>3</sub> OH              | 13       | 43                     | ND                      |
| 6     | DMF                             | 15       | 34                     | 12:1                    |
| 7     | THF <sup>d</sup>                | 3        | 87                     | 16:1                    |

<sup>a</sup>Reactions were performed with 0.20 mmol of silyl glyoxylate **1ae**, 0.24 mmol of **2a**, and 10 mol% of Ag<sub>2</sub>CO<sub>3</sub> in 2 mL solvent at room temperature. <sup>b</sup>Isolated yield after purification by column chromatography. <sup>c</sup>Determined by <sup>1</sup>H NMR analysis of crude mixture. <sup>d</sup>30 mol% of catalyst was used. ND = not determined.

**Table S4.** Optimization of the reaction conditions for unactive aroylsilane<sup>a</sup>
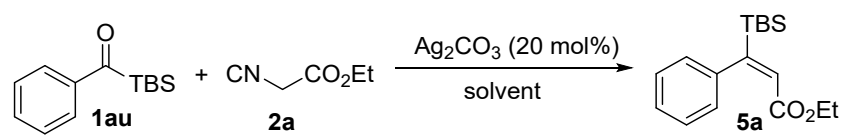

| Entry | Solvent            | temperature | Time (h) | Yield (%) <sup>b</sup> | <i>E/Z</i> <sup>c</sup> |
|-------|--------------------|-------------|----------|------------------------|-------------------------|
| 1     | THF <sup>d</sup>   | rt          | 24       | trace                  | ND                      |
| 2     | THF                | rt          | 24       | trace                  | ND                      |
| 3     | THF                | 80 °C       | 24       | 6                      | 4:1                     |
| 4     | CH <sub>3</sub> CN | 80 °C       | 24       | 52                     | 6:1                     |
| 5     | EtOAc              | 80 °C       | 24       | trace                  | ND                      |
| 6     | DMF                | 80 °C       | 24       | 60                     | 4:1                     |
| 7     | DCE                | 80 °C       | 24       | 45                     | 4:1                     |
| 8     | DMSO               | 80 °C       | 24       | 58                     | 4:1                     |
| 9     | DMSO               | 120 °C      | 23       | 64                     | 4:1                     |
| 10    | DMSO <sup>d</sup>  | 140 °C      | 7        | 65                     | 5:1                     |
| 11    | DMSO <sup>e</sup>  | 140 °C      | 10       | 61                     | 5:1                     |

<sup>a</sup>Reactions were performed with 0.20 mmol of aroylsilane **1au**, 0.24 mmol of **2a**, and 20 mol% of Ag<sub>2</sub>CO<sub>3</sub> in 2 mL solvent at room temperature. <sup>b</sup>Isolated yield after purification by column chromatography. <sup>c</sup>Determined by <sup>1</sup>H NMR analysis of crude mixture. <sup>d</sup>10 mol% of catalyst was used. <sup>e</sup>5 mol% of catalyst was used. ND = not determined.

### 3. The optimization of the reaction conditions with 1-methylisatin

Table S5. Optimization of the reaction conditions with 1-methylisatin<sup>a</sup>

| Entry | Solvent                         | Yield (%) <sup>b</sup> | <i>E/Z</i> <sup>c</sup> |
|-------|---------------------------------|------------------------|-------------------------|
| 1     | CH <sub>2</sub> Cl <sub>2</sub> | 17                     | -                       |
| 2     | CH <sub>3</sub> CN              | 48                     | >20:1                   |
| 3     | toluene                         | 20                     | -                       |
| 4     | DMSO                            | 24                     | -                       |
| 5     | DCE                             | 7                      | -                       |
| 6     | 1,4-dioxane                     | 21                     | -                       |
| 7     | DMF                             | 25                     | -                       |
| 8     | DMAc                            | 66                     | >20:1                   |
| 9     | THF                             | 55                     | >20:1                   |

<sup>a</sup>Reactions were performed with 0.20 mmol of **1a''**, 0.24 mmol of **2a**, and 30 mol% of Ag<sub>2</sub>CO<sub>3</sub> in 2 mL solvent at room temperature. <sup>b</sup>Isolated yield after purification by column chromatography. <sup>c</sup>Determined by <sup>1</sup>H NMR analysis of crude mixture.

#### Representative procedure for silver-catalyzed olefination reaction of 1-methylisatin with ethyl isocyanoacetate

The mixture of isatin **1a''** (32.2 mg, 0.2 mmol), ethyl isocyanoacetate **2a** (27.1 mg, 0.24 mmol), 30 mol% of Ag<sub>2</sub>CO<sub>3</sub> in solvent (2 mL) was stirred at room temperature for 24 h. After the reaction was finished, the mixture was purified by silica gel column chromatography (PE/EA = 4:1) to afford the desired product **3a'''**.

**3a'''**: Ethyl (*E*)-2-(1-methyl-2-oxoindolin-3-ylidene)acetate; isolated by column chromatography (EtOAc/petroleum ether = 1:5); bright orange solid, m.p. 91–92 °C; (30.5 mg, 66% yield); <sup>1</sup>H NMR (600 MHz, CDCl<sub>3</sub>): δ 8.54 (d, *J* = 7.8 Hz, 1H), 7.34–7.37 (m, 1H), 7.05 (d, *J* = 15.6 Hz, 1H), 6.89 (s, 1H), 6.78 (d, *J* = 7.8 Hz, 1H), 4.31 (q, *J* = 7.2 Hz, 2H), 3.21 (s, 3H), 1.36 (t, *J* = 7.2 Hz, 3H); <sup>13</sup>C NMR (150 MHz,

CDCl<sub>3</sub>):  $\delta$  167.5, 165.6, 145.9, 137.8, 132.4, 128.7, 122.8, 122.4, 119.8, 108.1, 61.1, 26.2, 14.1; The data are consistent with previous report.<sup>[5]</sup>

#### 4. Representative procedure for silver-catalyzed olefination reaction of alkynyl acylsilanes with ethyl isocyanoacetate

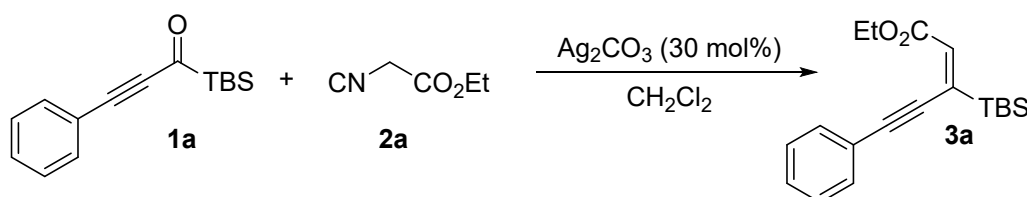

Alkynyl acylsilane **1a** (48.8 mg, 0.20 mmol) and ethyl isocyanoacetate **2a** (27.1 mg, 0.24 mmol) were dissolved in CH<sub>2</sub>Cl<sub>2</sub> (2 mL). Then Ag<sub>2</sub>CO<sub>3</sub> (16.5 mg, 0.06 mmol) was added at room temperature. After stirring for 48 h, the reaction mixture was extracted with EtOAc, the combined organic phases were washed with brine, dried over anhydrous Na<sub>2</sub>SO<sub>4</sub>, filtered, and concentrated. The residue was purified by flash chromatography to afford the product **3a** (51.5 mg, 82% yield).

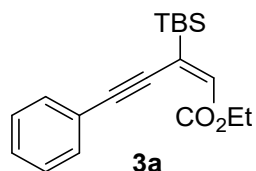

**3a**: (*E*)-2-(*tert*-butyldimethylsilyl)-4-phenylbut-1-en-3-yn-1-yl propionate; isolated by column chromatography (EtOAc/petroleum ether = 1:30); colorless oil; (51.5 mg, 82% yield); <sup>1</sup>H NMR (600 MHz, CDCl<sub>3</sub>):  $\delta$  7.50–7.49 (m, 2H), 7.34–7.33 (m, 3H), 6.29 (s, 1H), 4.26 (dd, 14.4 Hz, *J* = 7.2, 2H), 1.34 (t, *J* = 7.2 Hz, 3H), 1.00 (s, 9H), 0.26 (s, 6H); <sup>13</sup>C NMR (150 MHz, CDCl<sub>3</sub>):  $\delta$  164.3, 141.2, 131.7, 128.7, 128.3, 123.7, 108.0, 89.9, 60.3, 26.6, 17.5, 14.3, -6.4; HRMS (ESI) *m/z* calcd for [C<sub>19</sub>H<sub>26</sub>OSi + Na]<sup>+</sup> 337.1600, found 337.1605.

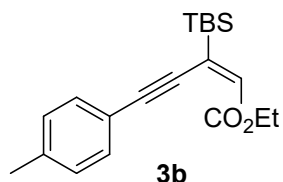

**3b:** (*E*)-2-(*tert*-butyldimethylsilyl)-4-(*p*-tolyl)but-1-en-3-yn-1-yl propionate; isolated by column chromatography (EtOAc/petroleum ether = 1:30); colorless oil; (54.4 mg, 83% yield);  $^1\text{H}$  NMR (600 MHz,  $\text{CDCl}_3$ ):  $\delta$  7.39 (d,  $J = 7.8$  Hz, 2H), 7.14 (d,  $J = 7.8$  Hz, 2H), 6.27 (s, 1H), 4.26 (dd, 14.4,  $J = 7.2$  Hz, 2H), 2.36 (s, 3H), 1.34 (t,  $J = 6.6$  Hz, 3H), 0.99 (s, 9H), 0.25 (s, 6H);  $^{13}\text{C}$  NMR (150 MHz,  $\text{CDCl}_3$ ):  $\delta$  164.3, 141.4, 139.1, 133.8, 131.7, 129.1, 120.6, 108.6, 89.5, 60.3, 26.6, 21.6, 17.5, 14.4, -6.4; HRMS (ESI)  $m/z$  calcd for  $[\text{C}_{20}\text{H}_{28}\text{O}_2\text{Si} + \text{Na}]^+$  351.1756, found 351.1758.

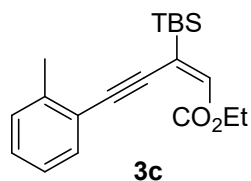

**3c:** (*E*)-2-(*tert*-butyldimethylsilyl)-4-(*o*-tolyl)but-1-en-3-yn-1-yl propionate; isolated by column chromatography (EtOAc/petroleum ether = 1:30); colorless oil; (51.8 mg, 79% yield);  $^1\text{H}$  NMR (600 MHz,  $\text{CDCl}_3$ ):  $\delta$  7.50 (d,  $J = 7.2$  Hz, 1H), 7.28–7.23 (m, 2H), 7.18–7.16 (m, 1H), 6.32 (s, 1H), 4.28 (dd, 14.4,  $J = 7.2$  Hz, 2H), 2.55 (s, 3H), 1.34 (t,  $J = 7.2$  Hz, 3H), 1.02 (s, 9H), 0.29 (s, 6H);  $^{13}\text{C}$  NMR (150 MHz,  $\text{CDCl}_3$ ):  $\delta$  164.2, 141.0, 140.5, 134.2, 132.5, 128.8, 125.5, 123.5, 106.9, 93.5, 60.3, 26.7, 20.8, 17.5, 14.4, -6.3; HRMS (ESI)  $m/z$  calcd for  $[\text{C}_{20}\text{H}_{28}\text{O}_2\text{Si} + \text{Na}]^+$  351.1756, found 351.1758.

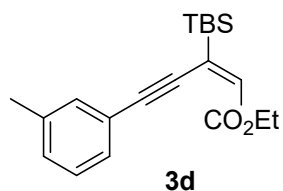

**3d:** (*E*)-2-(*tert*-butyldimethylsilyl)-4-(*m*-tolyl)but-1-en-3-yn-1-yl propionate; isolated by column chromatography (EtOAc/petroleum ether = 1:30); colorless oil; (52.4 mg, 80% yield);  $^1\text{H}$  NMR (600 MHz,  $\text{CDCl}_3$ ):  $\delta$  7.12 (s, 2H), 6.97 (s, 1H), 6.28 (s, 1H), 4.27



(dd,  $J=14.4, 7.2$  Hz, 2H), 2.30 (s, 6H), 1.34 (t,  $J = 7.2$  Hz, 3H), 0.99 (s, 9H), 0.26 (s, 6H);  $^{13}\text{C}$  NMR (150 MHz,  $\text{CDCl}_3$ ):  $\delta$  164.3, 141.5, 137.9, 134.0, 130.7, 129.3, 123.3, 108.8, 89.2, 60.3, 26.6, 21.1, 17.5, 14.3, -6.4; HRMS (ESI)  $m/z$  calcd for  $[\text{C}_{20}\text{H}_{28}\text{O}_2\text{Si} + \text{Na}]^+$  351.1756, found 351.1754.

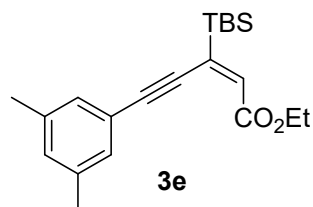

**3e:** ethyl (*E*)-3-(*tert*-butyldimethylsilyl)-5-(3,5-dimethylphenyl)pent-2-en-4-ynoate; isolated by column chromatography (EtOAc/petroleum ether = 1:30); colorless oil; (52.6 mg, 77% yield);  $^1\text{H}$  NMR (600 MHz,  $\text{CDCl}_3$ ):  $\delta$  7.12 (s, 2H), 6.97 (s, 1H), 6.28 (s, 1H), 4.27 (dd,  $J=14.4, 7.2$  Hz, 2H), 2.30 (s, 6H), 1.34 (t,  $J = 7.2$  Hz, 3H), 0.99 (s, 9H), 0.26 (s, 6H);  $^{13}\text{C}$  NMR (150 MHz,  $\text{CDCl}_3$ ):  $\delta$  164.3, 141.5, 137.9, 134.0, 130.7, 129.3, 123.3, 108.8, 89.2, 60.3, 26.6, 21.1, 17.5, 14.3, -6.4; HRMS (ESI)  $m/z$  calcd for  $[\text{C}_{21}\text{H}_{30}\text{O}_2\text{Si} + \text{Na}]^+$  365.1913, found 365.1907.

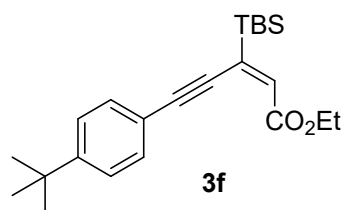

**3f:** ethyl (*E*)-5-(4-(*tert*-butyl)phenyl)-3-(*tert*-butyldimethylsilyl)pent-2-en-4-ynoate; isolated by column chromatography (EtOAc/petroleum ether = 1:30); colorless oil; (65.1 mg, 88% yield);  $^1\text{H}$  NMR (600 MHz,  $\text{CDCl}_3$ ):  $\delta$  7.45–7.43 (m, 2H), 7.37–7.35 (m, 2H), 6.27 (s, 1H), 4.27 (dd,  $J=14.4, 7.2$  Hz, 2H), 1.35 (t,  $J = 7.2$  Hz, 3H), 1.31 (s, 9H), 0.26 (s, 6H);  $^{13}\text{C}$  NMR (150 MHz,  $\text{CDCl}_3$ ):  $\delta$  164.3, 152.1, 141.3, 133.8, 131.4, 125.3, 120.7, 108.5, 89.4, 60.2, 34.8, 31.1, 26.6, 17.4, 14.3, -6.4; HRMS (ESI)  $m/z$  calcd for  $[\text{C}_{23}\text{H}_{34}\text{O}_2\text{Si} + \text{Na}]^+$  393.2226, found 393.2220.

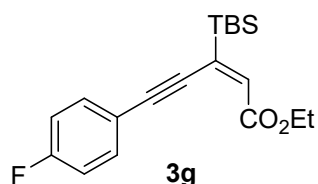

**3g:** ethyl (*E*)-3-(*tert*-butyldimethylsilyl)-5-(4-fluorophenyl)pent-2-en-4-ynoate; isolated by column chromatography (EtOAc/petroleum ether = 1:30); colorless oil; (54.4 mg, 82% yield);  $^1\text{H NMR}$  (600 MHz,  $\text{CDCl}_3$ ):  $\delta$  7.49–7.45 (m, 2H), 7.40–7.00 (m, 2H), 6.29 (s, 1H), 4.25 (dd,  $J=13.8, 6.6$  Hz, 2H), 1.33 (t,  $J=6.6$  Hz, 3H), 0.98 (s, 9H), 0.25 (s, 6H);  $^{13}\text{C NMR}$  (150 MHz,  $\text{CDCl}_3$ ):  $\delta$  164.2, 162.8 ( $J_{\text{C-F}} = 249.0$  Hz), 141.0, 134.4, 133.7 ( $J_{\text{C-F}} = 7.5$  Hz), 119.8 ( $J_{\text{C-F}} = 3.0$  Hz), 115.6 ( $J_{\text{C-F}} = 22.5$  Hz), 106.8, 89.7, 60.3, 26.6, 17.4, 14.3, -6.4; HRMS (ESI)  $m/z$  calcd for  $[\text{C}_{19}\text{H}_{25}\text{FO}_2\text{Si} + \text{Na}]^+$  355.1506, found 355.1499.

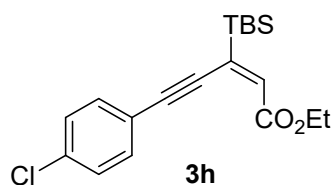

**3h:** ethyl (*E*)-3-(*tert*-butyldimethylsilyl)-5-(4-chlorophenyl)pent-2-en-4-ynoate; isolated by column chromatography (EtOAc/petroleum ether = 1:30); colorless oil; (61.1 mg, 88% yield);  $^1\text{H NMR}$  (600 MHz,  $\text{CDCl}_3$ ):  $\delta$  7.42–7.41 (m, 2H), 7.31–7.30 (m, 2H), 6.30 (s, 1H), 4.26 (dd,  $J=14.4, 7.2$  Hz, 2H), 1.33 (t,  $J=7.2$  Hz, 3H), 0.98 (s, 9H), 0.25 (s, 6H);  $^{13}\text{C NMR}$  (150 MHz,  $\text{CDCl}_3$ ):  $\delta$  164.2, 140.8, 134.8, 132.8, 128.7, 122.1, 106.5, 90.8, 60.4, 26.6, 17.5, 14.3, -6.4; HRMS (ESI)  $m/z$  calcd for  $[\text{C}_{19}\text{H}_{25}\text{ClO}_2\text{Si} + \text{Na}]^+$  371.1210, found 371.1215.

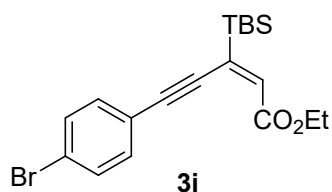

**3i:** ethyl (*E*)-5-(4-bromophenyl)-3-(*tert*-butyldimethylsilyl)pent-2-en-4-ynoate; isolated by column chromatography (EtOAc/petroleum ether = 1:30); colorless oil;

(63.5 mg, 81% yield);  $^1\text{H}$  NMR (600 MHz,  $\text{CDCl}_3$ ):  $\delta$  7.47–7.46 (m, 2H), 7.35–7.34 (m, 2H), 6.31 (s, 1H), 4.25 (dd,  $J=13.8, 6.6$  Hz, 2H), 1.33 (t,  $J=7.2$  Hz, 3H), 0.98 (s, 9H), 0.25 (s, 6H);  $^{13}\text{C}$  NMR (150 MHz,  $\text{CDCl}_3$ ):  $\delta$  164.2, 140.8, 134.8, 133.0, 131.6, 123.1, 120.6, 106.6, 90.9, 60.4, 26.6, 17.5, 14.3, -6.4; HRMS (ESI)  $m/z$  calcd for  $[\text{C}_{19}\text{H}_{25}\text{BrO}_2\text{Si} + \text{Na}]^+$  415.0705, found 415.0696.

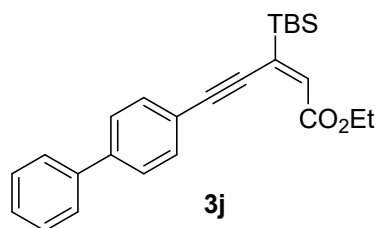

**3j:** ethyl (*E*)-5-([1,1'-biphenyl]-4-yl)-3-(*tert*-butyldimethylsilyl)pent-2-en-4-ynoate; isolated by column chromatography (EtOAc/petroleum ether = 1:30); colorless oil; (63.2 mg, 82% yield);  $^1\text{H}$  NMR (600 MHz,  $\text{CDCl}_3$ ):  $\delta$  7.61–7.58 (m, 6H), 7.46–7.44 (m, 2H), 6.31 (s, 1H), 4.29 (dd,  $J=14.4, 7.2$  Hz, 2H), 1.36 (t,  $J=7.2$  Hz, 2H), 1.02 (s, 9H), 0.28 (s, 6H);  $^{13}\text{C}$  NMR (150 MHz,  $\text{CDCl}_3$ ):  $\delta$  164.3, 141.5, 141.2, 140.3, 134.2, 132.1, 128.8, 127.7, 127.0, 122.6, 108.0, 90.6, 60.3, 26.6, 17.5, 14.4, -6.4; HRMS (ESI)  $m/z$  calcd for  $[\text{C}_{25}\text{H}_{30}\text{O}_2\text{Si} + \text{Na}]^+$  413.1913, found 413.1912.

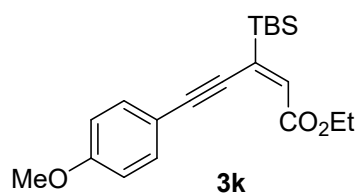

**3k:** ethyl (*E*)-3-(*tert*-butyldimethylsilyl)-5-(4-methoxyphenyl)pent-2-en-4-ynoate; isolated by column chromatography (EtOAc/petroleum ether = 1:30); colorless oil; (53.6 mg, 78% yield);  $^1\text{H}$  NMR (600 MHz,  $\text{CDCl}_3$ ):  $\delta$  7.45–7.44 (m, 2H), 6.86–6.84 (m, 2H), 6.24 (s, 1H), 4.25 (dd,  $J=14.4, 7.2$  Hz, 2H), 3.79 (s, 3H), 1.33 (t,  $J=7.2$  Hz, 3H), 0.98 (s, 9H), 0.24 (s, 6H);  $^{13}\text{C}$  NMR (150 MHz,  $\text{CDCl}_3$ ):  $\delta$  164.3, 160.1, 141.5, 133.4, 133.1, 115.8, 114.0, 108.7, 89.2, 60.1, 55.2, 26.6, 17.4, 14.3, -6.4; HRMS (ESI)  $m/z$  calcd for  $[\text{C}_{20}\text{H}_{28}\text{O}_3\text{Si} + \text{Na}]^+$  367.1705, found 367.1698.

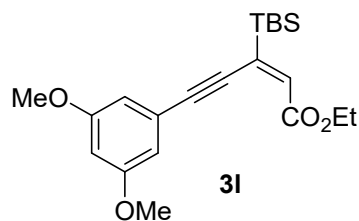

**3l:** ethyl (*E*)-3-(*tert*-butyldimethylsilyl)-5-(3,5-dimethoxyphenyl)pent-2-en-4-ynoate; isolated by column chromatography (EtOAc/petroleum ether = 1:30); colorless oil; (53.1 mg, 71% yield); <sup>1</sup>H NMR (600 MHz, CDCl<sub>3</sub>): δ 6.64 (d, *J* = 2.4 Hz, 1H), 6.46 (t, *J* = 2.4 Hz, 1H), 6.29 (s, 1H), 4.26 (dd, *J* = 14.4, 7.2 Hz, 2H), 3.79 (s, 6H), 1.34 (t, *J* = 7.2 Hz, 3H), 0.99 (s, 9H), 0.25 (s, 6H); <sup>13</sup>C NMR (150 MHz, CDCl<sub>3</sub>): δ 164.2, 160.5, 141.7, 134.5, 125.0, 109.4, 108.0, 102.0, 89.3, 60.4, 55.4, 26.6, 17.5, 14.3, -6.4; HRMS (ESI) *m/z* calcd for [C<sub>21</sub>H<sub>30</sub>O<sub>4</sub>Si + Na]<sup>+</sup> 397.1811, found 397.1803.

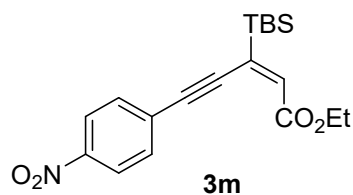

**3m:** ethyl (*E*)-3-(*tert*-butyldimethylsilyl)-5-(4-nitrophenyl)pent-2-en-4-ynoate; isolated by column chromatography (EtOAc/petroleum ether = 1:30); colorless oil; (50.2 mg, 70% yield); <sup>1</sup>H NMR (600 MHz, CDCl<sub>3</sub>): δ 8.20 (d, *J* = 9 Hz, 2H), 7.61 (d, *J* = 9 Hz, 2H), 6.38 (s, 1H), 4.26 (dd, *J* = 14.4, 7.2 Hz, 2H), 1.33 (t, *J* = 7.2 Hz, 3H), 0.99 (s, 9H), 0.26 (s, 6H); <sup>13</sup>C NMR (150 MHz, CDCl<sub>3</sub>): δ 164.0, 147.2, 140.0, 136.4, 132.1, 130.4, 123.6, 104.7, 94.5, 60.6, 26.5, 17.5, 14.3, -6.4; HRMS (ESI) *m/z* calcd for [C<sub>19</sub>H<sub>25</sub>NO<sub>4</sub>Si + Na]<sup>+</sup> 382.1451, found 382.1450.

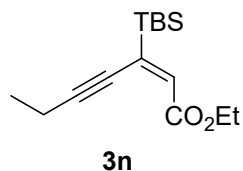

**3n:** ethyl (*E*)-3-(*tert*-butyldimethylsilyl)hept-2-en-4-ynoate; isolated by column chromatography (EtOAc/petroleum ether = 1:30); colorless oil; (44.1 mg, 83% yield);

$^1\text{H}$  NMR (600 MHz,  $\text{CDCl}_3$ ):  $\delta$  7.18 (s, 1H), 4.19 (dd,  $J=14.4, 7.2$  Hz, 2H), 2.50 (dd,  $J=15, 7.2$  Hz, 2H), 1.28 (t,  $J=7.2$  Hz, 3H), 1.19 (t,  $J=7.8$  Hz, 3H), 0.91 (s, 9H), 0.15 (s, 6H);  $^{13}\text{C}$  NMR (150 MHz,  $\text{CDCl}_3$ ):  $\delta$  164.2, 143.0, 133.5, 112.3, 80.5, 60.0, 26.6, 17.2, 14.2, 14.1 13.6, -6.5; HRMS (ESI)  $m/z$  calcd for  $[\text{C}_{15}\text{H}_{26}\text{O}_2\text{Si} + \text{Na}]^+$  289.1600, found 289.1602.

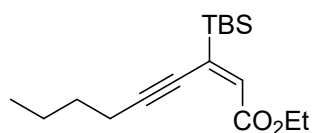

**3o**

**3o:** ethyl (*E*)-3-(*tert*-butyldimethylsilyl)non-2-en-4-ynoate; isolated by column chromatography (EtOAc/petroleum ether = 1:30); colorless oil; (52.3 mg, 89% yield);  $^1\text{H}$  NMR (600 MHz,  $\text{CDCl}_3$ ):  $\delta$  6.20 (s, 1H), 4.21 (dd,  $J=14.4, 7.2$  Hz, 2H), 2.5 (t,  $J=6.6$  Hz, 2H), 1.61–1.55 (m, 3H), 1.47–1.41 (m, 2H), 1.3 (t,  $J=7.2$  Hz, 3H), 0.91 (t,  $J=7.2$  Hz, 3H), 0.93 (s, 9H), 0.17 (s, 6H);  $^{13}\text{C}$  NMR (150 MHz,  $\text{CDCl}_3$ ):  $\delta$  164.3, 143.0, 133.7, 111.2, 81.0, 60.1, 30.7, 26.6, 20.3, 17.3, 14.3, 13.6, -6.4; HRMS (ESI)  $m/z$  calcd for  $[\text{C}_{17}\text{H}_{30}\text{O}_2\text{Si} + \text{Na}]^+$  317.1913, found 317.1907.

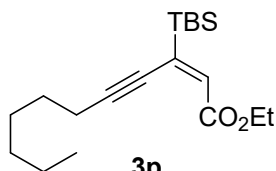

**3p**

**3p:** ethyl (*E*)-3-(*tert*-butyldimethylsilyl)undec-2-en-4-ynoate; isolated by column chromatography (EtOAc/petroleum ether = 1:30); colorless oil; (52.3 mg, 82% yield);  $^1\text{H}$  NMR (600 MHz,  $\text{CDCl}_3$ ):  $\delta$  6.18 (s, 1H), 4.19 (dd,  $J=14.4, 7.2$  Hz, 2H), 1.58–1.54 (m, 2H), 1.43–1.38 (m, 2H), 1.31–1.25 (m, 7H), 0.92 (s, 9H), 0.86 (t,  $J=6.6$  Hz, 3H), 0.15 (s, 6H);  $^{13}\text{C}$  NMR (150 MHz,  $\text{CDCl}_3$ ):  $\delta$  164.2, 142.9, 133.6, 111.1, 81.0, 60.0, 31.3, 26.6, 20.5, 17.2, 14.2, 14.0, -6.5; HRMS (ESI)  $m/z$  calcd for  $[\text{C}_{19}\text{H}_{34}\text{O}_2\text{Si} + \text{Na}]^+$  345.2226, found 345.2231.

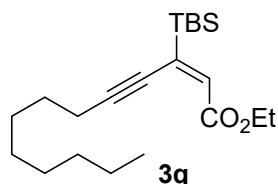

**3q:** ethyl (*E*)-3-(*tert*-butyldimethylsilyl)tridec-2-en-4-ynoate; isolated by column chromatography (EtOAc/petroleum ether = 1:30); colorless oil; (54.6 mg, 78% yield);  $^1\text{H}$  NMR (600 MHz,  $\text{CDCl}_3$ ):  $\delta$  6.18 (s, 1H), 4.18 (dd,  $J=14.4, 7.2$  Hz, 2H), 2.47 (t,  $J=6.6$  Hz, 2H), 1.58–1.53 (m, 2H), 1.42–1.37 (m, 2H), 1.29–1.24 (m, 11H), 0.91 (s, 9H) 0.85 (t,  $J=6.6$  Hz, 3H), 0.15 (s, 6H);  $^{13}\text{C}$  NMR (150 MHz,  $\text{CDCl}_3$ ):  $\delta$  164.2, 142.8, 133.6, 111.1, 81.0, 60.0, 31.8, 29.1, 29.0, 28.6, 26.6, 22.6, 20.5, 17.2, 14.2, 14.0, -6.5; HRMS (ESI)  $m/z$  calcd for  $[\text{C}_{21}\text{H}_{38}\text{O}_2\text{Si} + \text{Na}]^+$  373.2539, found 373.2537.

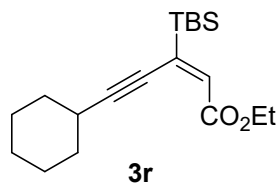

**3r:** ethyl (*E*)-3-(*tert*-butyldimethylsilyl)-5-cyclohexylpent-2-en-4-ynoate; isolated by column chromatography (EtOAc/petroleum ether = 1:30); colorless oil; (58.2 mg, 91% yield);  $^1\text{H}$  NMR (600 MHz,  $\text{CDCl}_3$ ):  $\delta$  6.19 (s, 1H), 4.21 (dd,  $J=13.8, 6.6$  Hz, 2H), 1.89–1.87 (m, 2H), 1.74–1.71 (m, 2H), 1.55–1.49 (m, 2H), 1.32–1.29 (m, 6H), 0.94 (s, 9H), 0.17 (s, 6H);  $^{13}\text{C}$  NMR (150 MHz,  $\text{CDCl}_3$ ):  $\delta$  164.3, 142.8, 133.5, 115.1, 81.0, 32.5, 30.8, 26.6, 25.9, 25.0, 17.3, 14.3, -6.4; HRMS (ESI)  $m/z$  calcd for  $[\text{C}_{19}\text{H}_{32}\text{O}_2\text{Si} + \text{Na}]^+$  343.2069, found 343.2063.

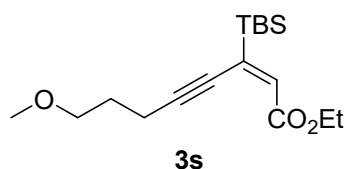

**3s:** ethyl (*E*)-3-(*tert*-butyldimethylsilyl)-7-methoxyhept-2-en-4-ynoate; isolated by column chromatography (EtOAc/petroleum ether = 1:30); colorless oil; (41.4 mg, 70% yield);  $^1\text{H}$  NMR (600 MHz,  $\text{CDCl}_3$ ):  $\delta$  6.21 (s, 1H), 4.21 (dd,  $J=13.8, 7.2$  Hz, 2H), 3.49 (t,  $J=6.6$  Hz, 2H), 3.33 (s, 3H), 2.59 (t,  $J=7.2$  Hz, 2H), 1.87–1.82 (m, 2H), 1.30

(t,  $J = 7.2$  Hz, 3H), 10.93 (s, 9H), 0.17 (s, 6H);  $^{13}\text{C}$  NMR (150 MHz,  $\text{CDCl}_3$ ):  $\delta$  164.2, 142.7, 134.0, 110.0, 81.3, 60.1, 58.6, 28.7, 26.6, 17.3, 14.3, -6.4; HRMS (ESI)  $m/z$  calcd for  $[\text{C}_{16}\text{H}_{28}\text{O}_3\text{Si} + \text{Na}]^+$  319.1705, found 319.1710.

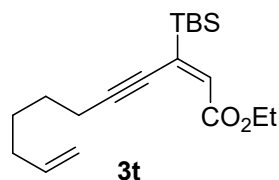

**3t:** ethyl (*E*)-3-(*tert*-butyldimethylsilyl)undeca-2,10-dien-4-ynoate; isolated by column chromatography (EtOAc/petroleum ether = 1:30); colorless oil; (54.4 mg, 85% yield);  $^1\text{H}$  NMR (600 MHz,  $\text{CDCl}_3$ ):  $\delta$  6.17 (s, 1H), 5.79–5.77 (m, 2H), 4.98–4.94 (m, 1H), 4.91–4.89 (m, 1H), 4.17 (dd,  $J = 14.4, 7.2$  Hz, 2H), 2.48 (t,  $J = 6.6$  Hz, 2H), 2.05–2.01 (m, 2H), 1.59–1.54 (m, 2H), 1.53–1.47 (m, 2H), 1.26 (t,  $J = 7.2$  Hz, 3H), 0.90 (s, 9H), 0.13 (s, 6H);  $^{13}\text{C}$  NMR (150 MHz,  $\text{CDCl}_3$ ):  $\delta$  164.1, 142.6, 138.4, 133.7, 114.4, 110.6, 81.1, 59.9, 33.1, 28.1, 28.0, 26.5, 20.3, 17.2, 14.2, -6.6; HRMS (ESI)  $m/z$  calcd for  $[\text{C}_{19}\text{H}_{32}\text{O}_2\text{Si} + \text{Na}]^+$  343.2069, found 343.2067.

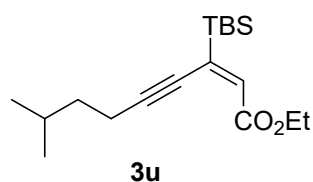

**3u:** ethyl (*E*)-3-(*tert*-butyldimethylsilyl)-8-methylnon-2-en-4-ynoate; isolated by column chromatography (EtOAc/petroleum ether = 1:30); colorless oil; (51.7 mg, 84% yield);  $^1\text{H}$  NMR (600 MHz,  $\text{CDCl}_3$ ):  $\delta$  6.20 (s, 1H), 4.21 (dd,  $J = 14.4, 7.2$  Hz, 2H), 2.51 (t,  $J = 7.2$  Hz, 2H), 1.73–1.69 (m, 1H), 1.48 (dd,  $J = 7.2, 14.4$  Hz, 2H), 1.30 (t,  $J = 7.2$  Hz, 3H), 0.93 (s, 9H), 0.90 (s, 9H), 0.89 (s, 9H), 0.17 (s, 6H);  $^{13}\text{C}$  NMR (150 MHz,  $\text{CDCl}_3$ ):  $\delta$  164.3, 143.0, 133.7, 111.2, 81.0, 60.1, 37.5, 27.3, 26.6, 22.1, 17.3, 14.3, -6.5; HRMS (ESI)  $m/z$  calcd for  $[\text{C}_{18}\text{H}_{32}\text{O}_2\text{Si} + \text{Na}]^+$  331.2069, found 331.2065.

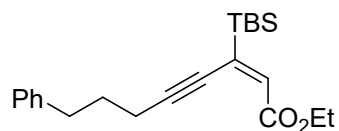

**3v**

**3v:** ethyl (*E*)-3-(*tert*-butyldimethylsilyl)-8-phenyloct-2-en-4-ynoate; isolated by column chromatography (EtOAc/petroleum ether = 1:30); colorless oil; (56.9 mg, 80% yield);  $^1\text{H}$  NMR (400 MHz,  $\text{CDCl}_3$ ):  $\delta$  7.27–7.24 (m, 2H), 7.19–7.16 (m, 3H), 6.21 (s, 1H), 4.20 (dd,  $J = 14.4, 7.2$  Hz, 2H), 2.75 (t,  $J = 7.2$  Hz, 2H), 2.52 (t,  $J = 6.6$  Hz, 2H), 1.91–1.86 (m, 2H), 1.28 (t,  $J = 7.2$  Hz, 3H), 0.93 (s, 9H), 0.18 (s, 6H);  $^{13}\text{C}$  NMR (150 MHz,  $\text{CDCl}_3$ ):  $\delta$  164.2, 142.7, 141.7, 134.0, 128.5, 128.3, 125.9, 110.3, 81.5, 60.1, 35.0, 30.4, 26.6, 20.1, 17.3, 14.3, -6.4; HRMS (ESI)  $m/z$  calcd for  $[\text{C}_{22}\text{H}_{32}\text{O}_2\text{Si} + \text{Na}]^+$  379.2069, found 379.2061.

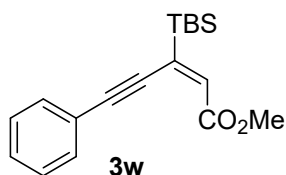

**3w**

**3w:** methyl (*E*)-3-(*tert*-butyldimethylsilyl)-5-phenylpent-2-en-4-ynoate; isolated by column chromatography (EtOAc/petroleum ether = 1:100); colorless oil; (41.9 mg, 71% yield);  $^1\text{H}$  NMR (600 MHz,  $\text{CDCl}_3$ ):  $\delta$  7.51–7.49 (m, 2H), 7.34–7.33 (m, 3H), 6.30 (s, 1H), 3.80 (s, 3H), 0.99 (s, 9H), 0.25 (s, 6H);  $^{13}\text{C}$  NMR (150 MHz,  $\text{CDCl}_3$ ):  $\delta$  164.6, 141.6, 133.8, 131.7, 128.3, 123.6, 108.2, 89.8, 51.4, 45.9, 26.6, 17.4, -6.4; HRMS (ESI)  $m/z$  calcd for  $[\text{C}_{18}\text{H}_{24}\text{O}_2\text{Si} + \text{Na}]^+$  323.1443, found 323.1443.

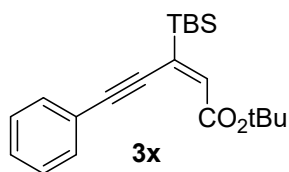

**3x**

**3x:** *tert*-butyl (*E*)-3-(*tert*-butyldimethylsilyl)-5-phenylpent-2-en-4-ynoate; isolated by column chromatography (EtOAc/petroleum ether = 1:100); colorless oil; (36.1 mg, 54% yield);  $^1\text{H}$  NMR (600 MHz,  $\text{CDCl}_3$ ):  $\delta$  7.51–7.47 (m, 2H), 7.34–7.32 (m, 3H), 6.20 (s, 1H), 1.54 (s, 9H), 0.99 (s, 9H), 0.25 (s, 6H);  $^{13}\text{C}$  NMR (150 MHz,  $\text{CDCl}_3$ ):  $\delta$



163.6, 139.0, 136.5, 131.5, 128.3, 123.9, 107.2, 89.9, 80.6, 28.3, 26.7, 17.5, -6.3;  
HRMS (ESI)  $m/z$  calcd for  $[C_{21}H_{30}O_2Si + Na]^+$  365.1913, found 365.1918.

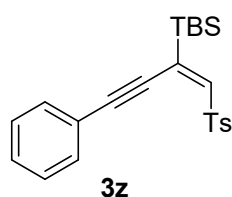

**3z:** (*E*)-*tert*-butyl(1,4-diphenylbut-1-en-3-yn-2-yl)dimethylsilane; isolated by column chromatography (EtOAc/petroleum ether = 1:100); colorless oil; (52 mg, 68% yield);  $^1H$  NMR (600 MHz,  $CDCl_3$ ):  $\delta$  7.69 (d,  $J = 7.9$  Hz, 2H), 7.24 (d,  $J = 7.9$  Hz, 2H), 7.16 (s, 2H), 7.06 (d,  $J = 7.9$  Hz, 2H), 7.04 (s, 1H), 6.56 (s, 1H), 2.18 (s, 3H), 0.68 (s, 9H), -0.00 (s, 6H);  $^{13}C$  NMR (150 MHz,  $CDCl_3$ ):  $\delta$  144.4, 143.2, 140.1, 138.4, 131.9, 129.7, 129.5, 128.6, 128.2, 123.0, 111.7, 86.6, 26.6, 21.8, 17.8, -6.4; HRMS (ESI)  $m/z$  calcd for  $[C_{23}H_{28}O_2SSi + Na]^+$  419.1471, found 419.1483.

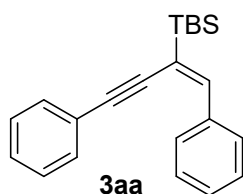

**3aa:** (*E*)-*tert*-butyl(1,4-diphenylbut-1-en-3-yn-2-yl)dimethylsilane; isolated by column chromatography (EtOAc/petroleum ether = 1:100); colorless oil; (39.4 mg, 62% yield);  $^1H$  NMR (600 MHz,  $CDCl_3$ ):  $\delta$  8.12–8.10 (m, 2H), 7.55–7.53 (m, 2H), 7.48–7.45 (m, 2H), 7.43–7.37 (m, 4H), 6.96 (s, 1H), 1.11 (s, 9H), 0.38 (s, 6H);  $^{13}C$  NMR (150 MHz,  $CDCl_3$ ):  $\delta$  145.7, 137.8, 131.1, 128.9, 128.5, 128.4, 128.2, 127.9, 124.4, 121.3, 101.1, 91.4, 26.8, 17.8, -6.2; HRMS (ESI)  $m/z$  calcd for  $[C_{22}H_{26}Si + H]^+$  319.1882, found 319.1884.

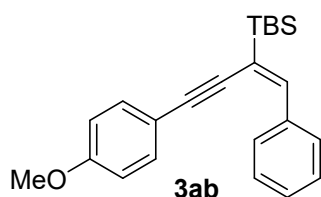

**3ab:** (*E*)-*tert*-butyl(4-(4-methoxyphenyl)-1-phenylbut-1-en-3-yn-2-yl)dimethylsilane; isolated by column chromatography (EtOAc/petroleum ether = 1:100); colorless oil; (27.4 mg, 39% yield);  $^1\text{H}$  NMR (600 MHz,  $\text{CDCl}_3$ ):  $\delta$  8.04–8.03 (m, 2H), 7.41–7.38 (m, 4H), 7.31–7.29 (m, 1H), 6.89–6.83 (m, 2H), 6.83 (s, 1H), 3.83 (s, 3H), 1.03 (s, 9H), 0.29 (s, 6H);  $^{13}\text{C}$  NMR (150 MHz,  $\text{CDCl}_3$ ):  $\delta$  159.5, 144.8, 137.9, 132.6, 128.8, 128.3, 128.2, 121.6, 116.7, 114.0, 101.2, 90.2, 55.3, 26.8, 17.8, -6.2; HRMS (ESI)  $m/z$  calcd for  $[\text{C}_{23}\text{H}_{28}\text{OSi} + \text{H}]^+$  349.1988, found 349.1982.

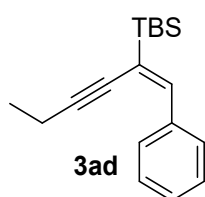

**3ad:** (*E*)-*tert*-butyldimethyl(1-phenylhex-1-en-3-yn-2-yl)silane; isolated by column chromatography (EtOAc/petroleum ether = 1:100); colorless oil; (25.9 mg, 48% yield);  $^1\text{H}$  NMR (600 MHz,  $\text{CDCl}_3$ ):  $\delta$  7.89–7.87 (m, 2H), 7.27–7.25 (m, 2H), 7.19–7.16 (m, 1H), 6.56 (s, 1H), 1.15 (t,  $J = 15.6$  Hz, 3H), 0.88 (s, 9H), 0.13 (s, 6H);  $^{13}\text{C}$  NMR (150 MHz,  $\text{CDCl}_3$ ):  $\delta$  144.4, 137.9, 128.6, 128.1, 122.6, 104.3, 81.6, 26.8, 17.7, 14.0, 13.9, -6.3; HRMS (ESI)  $m/z$  calcd for  $[\text{C}_{18}\text{H}_{26}\text{Si} + \text{Na}]^+$  293.1701, found 293.1697.

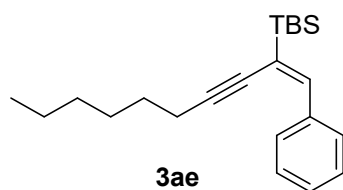

**3ae:** (*E*)-*tert*-butyldimethyl(1-phenyldec-1-en-3-yn-2-yl)silane; isolated by column chromatography (EtOAc/petroleum ether = 1:100); colorless oil; (36.5 mg, 56% yield);  $^1\text{H}$  NMR (600 MHz,  $\text{CDCl}_3$ ):  $\delta$  8.00–7.99 (m, 2H), 7.38–7.35 (m, 2H), 7.30–7.27 (m, 1H), 6.77 (s, 1H), 2.50 (t,  $J = 7.2$  Hz, 3H), 1.65–1.60 (m, 2H), 1.52–1.47 (m, 2H), 1.38–1.32 (m, 4H), 1.00 (s, 9H), 0.94 (t,  $J = 6.6$  Hz, 3H), 0.25 (s, 6H);  $^{13}\text{C}$  NMR (150 MHz,  $\text{CDCl}_3$ ):  $\delta$  144.5, 137.9, 128.6, 128.1, 128.0, 122.6, 103.2, 82.1, 31.5, 28.81,

28.76, 26.8, 22.6, 20.3, 17.7, 14.1, -6.2; HRMS (ESI)  $m/z$  calcd for  $[C_{22}H_{34}Si + H]^+$  327.2508, found 327.2506.

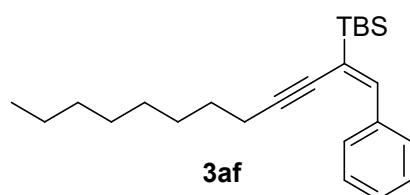

**3af**: *(E)*-tert-butyl(dimethyl)(1-phenyldodec-1-en-3-yn-2-yl)silane; isolated by column chromatography (EtOAc/petroleum ether = 1:100); colorless oil; (34.7 mg, 49% yield);  $^1H$  NMR (600 MHz,  $CDCl_3$ ):  $\delta$  7.97–7.96 (m, 2H), 7.35–7.33 (m, 2H), 7.29–7.27 (m, 1H), 6.73 (s, 1H), 2.47 (t,  $J = 7.2$  Hz, 3H), 1.62–1.55 (m, 2H), 1.47–1.43 (m, 2H), 1.31–1.28 (m, 7H), 0.96 (s, 9H), 0.89 (t,  $J = 6.6$  Hz, 3H), 0.21 (s, 6H);  $^{13}C$  NMR (150 MHz,  $CDCl_3$ ):  $\delta$  144.5, 137.9, 128.6, 128.1, 128.0, 122.7, 103.2, 82.0, 31.9, 29.3, 29.2, 29.1, 28.8, 26.8, 22.7, 20.3, 17.7, 14.1, -6.2; HRMS (ESI)  $m/z$  calcd for  $[C_{24}H_{38}Si + H]^+$  355.2821, found 355.2814.

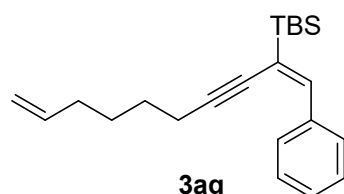

**3ag**: *(E)*-tert-butyl(dimethyl)(1-phenyldeca-1,9-dien-3-yn-2-yl)silane; isolated by column chromatography (EtOAc/petroleum ether = 1:100); colorless oil; (35.6 mg, 55% yield);  $^1H$  NMR (600 MHz,  $CDCl_3$ ):  $\delta$  7.89–7.87 (m, 2H), 7.27–7.25 (m, 2H), 7.19–7.17 (m, 1H), 6.66 (s, 1H), 5.77–5.71 (m, 1H), 4.96–4.93 (m, 1H), 4.89–4.88 (m, 1H), 2.42–2.40 (m, 2H), 2.04–2.00 (m, 2H), 1.54–1.47 (m, 4H), 0.89 (s, 9H), 0.13 (s, 6H);  $^{13}C$  NMR (150 MHz,  $CDCl_3$ ):  $\delta$  144.6, 138.6, 128.5, 128.1, 122.6, 114.6, 102.8, 82.2, 33.3, 28.3, 28.2, 26.8, 20.1, 17.7, -6.2; HRMS (ESI)  $m/z$  calcd for  $[C_{22}H_{32}Si + H]^+$  325.2352, found 325.2348.

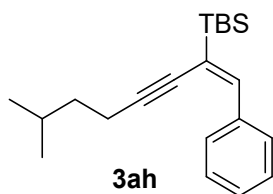

**3ah:** (*E*)-*tert*-butyldimethyl(7-methyl-1-phenyloct-1-en-3-yn-2-yl)silane; isolated by column chromatography (EtOAc/petroleum ether = 1:100); colorless oil; (37.4 mg, 60% yield);  $^1\text{H}$  NMR (600 MHz,  $\text{CDCl}_3$ ):  $\delta$  8.04–8.02 (m, 2H), 7.42–7.39 (m, 2H), 7.34–7.31 (m, 1H), 6.80 (s, 1H), 2.55 (t,  $J = 7.2$  Hz, 2H), 1.88–1.81 (m, 1H), 1.58–1.54 (m, 2H), 1.03 (s, 9H), 1.00 (s, 3H), 0.99 (s, 3H), 0.28 (s, 6H);  $^{13}\text{C}$  NMR (150 MHz,  $\text{CDCl}_3$ ):  $\delta$  144.5, 137.9, 128.6, 128.1, 122.6, 103.1, 82.0, 37.7, 27.2, 26.8, 22.2, 18.3, 17.7, -6.2; HRMS (ESI)  $m/z$  calcd for  $[\text{C}_{21}\text{H}_{32}\text{Si} + \text{H}]^+$  313.2352, found 313.2353.

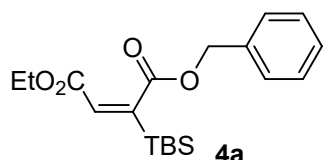

**4a:** 1-benzyl 4-ethyl 2-(*tert*-butyldimethylsilyl)maleate; isolated by column chromatography (EtOAc/petroleum ether = 1:30); colorless oil; (59.1 mg, 86% yield);  $^1\text{H}$  NMR (600 MHz,  $\text{CDCl}_3$ ):  $\delta$  7.41–7.38 (m, 2H), 7.37–7.30 (m, 3H), 6.10 (s, 1H), 5.24 (s, 2H), 4.16 (dd,  $J = 14.4, 7.2$  Hz, 2H), 1.26 (t,  $J = 7.2$  Hz, 3H), 0.91 (s, 9H), 0.13 (s, 6H);  $^{13}\text{C}$  NMR (150 MHz,  $\text{CDCl}_3$ ):  $\delta$  170.7, 163.7, 153.3, 135.5, 130.7, 128.8, 128.4, 128.2, 66.8, 60.9, 26.3, 17.3, 14.0, -6.4; HRMS (ESI)  $m/z$  calcd for  $[\text{C}_{19}\text{H}_{28}\text{O}_4\text{Si} + \text{Na}]^+$  371.1655, found 371.1646.

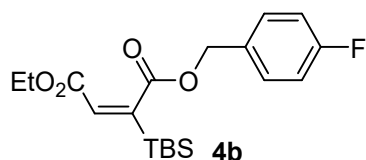

**4b:** 4-ethyl 1-(4-fluorobenzyl) 2-(*tert*-butyldimethylsilyl)maleate; isolated by column chromatography (EtOAc/petroleum ether = 1:30); colorless oil; (66.6 mg, 91% yield);  $^1\text{H}$  NMR (600 MHz,  $\text{CDCl}_3$ ):  $\delta$  7.39–7.37 (m, 2H), 7.05–7.02 (m, 2H), 6.09 (s, 1H),

5.20 (s, 2H), 4.16 (dd,  $J=14.4, 7.2$  Hz, 2H), 1.26 (t,  $J=7.2$  Hz, 3H), 0.90 (s, 9H), 0.11 (s, 6H);  $^{13}\text{C}$  NMR (150 MHz,  $\text{CDCl}_3$ ):  $\delta$  170.7, 163.8, 162.7 ( $J_{\text{C-F}} = 246.0$  Hz), 153.3, 131.5 ( $J_{\text{C-F}} = 3.0$  Hz), 130.9, 130.8 ( $J_{\text{C-F}} = 4.5$  Hz), 115.3 ( $J_{\text{C-F}} = 7.0$  Hz), 66.0, 61.0, 26.3, 17.4, 14.1, -6.4; HRMS (ESI)  $m/z$  calcd for  $[\text{C}_{19}\text{H}_{27}\text{FO}_2\text{Si} + \text{Na}]^+$  389.1560, found 389.1562.

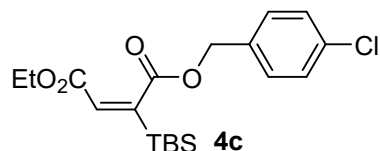

**4c**: 1-(4-chlorobenzyl) 4-ethyl 2-(*tert*-butyldimethylsilyl)maleate; isolated by column chromatography (EtOAc/petroleum ether = 1:30); colorless oil; (67.2 mg, 88% yield);  $^1\text{H}$  NMR (600 MHz,  $\text{CDCl}_3$ ):  $\delta$  7.35–7.31 (m, 4H), 6.10 (s, 1H), 5.19 (s, 2H), 4.17 (dd,  $J=14.4, 7.2$  Hz, 2H), 1.27 (t,  $J=3$  Hz, 3H), 0.91 (s, 9H), 0.12 (s, 6H);  $^{13}\text{C}$  NMR (150 MHz,  $\text{CDCl}_3$ ):  $\delta$  170.7, 163.8, 153.3, 134.2, 134.1, 130.9, 130.2, 128.6, 66.0, 61.0, 26.3, 17.4, 14.1, -6.4; HRMS (ESI)  $m/z$  calcd for  $[\text{C}_{19}\text{H}_{27}\text{ClO}_4\text{Si} + \text{Na}]^+$  405.1265, found 405.1264.

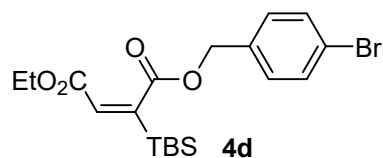

**4d**: 1-(4-bromobenzyl) 4-ethyl 2-(*tert*-butyldimethylsilyl)maleate; isolated by column chromatography (EtOAc/petroleum ether = 1:30); colorless oil; (79.2 mg, 93% yield);  $^1\text{H}$  NMR (600 MHz,  $\text{CDCl}_3$ ):  $\delta$  7.34–7.31 (m, 4H), 6.09 (s, 1H), 5.19 (s, 2H), 4.16 (dd,  $J=14.4, 7.2$  Hz, 2H), 1.26 (t,  $J=7.2$  Hz, 3H), 0.90 (s, 9H), 0.12 (s, 6H);  $^{13}\text{C}$  NMR (150 MHz,  $\text{CDCl}_3$ ):  $\delta$  170.7, 163.8, 153.3, 134.2, 134.1, 130.9, 130.2, 128.6, 66.0, 61.0, 26.3, 17.4, 14.1, -6.4; HRMS (ESI)  $m/z$  calcd for  $[\text{C}_{19}\text{H}_{27}\text{BrO}_4\text{Si} + \text{Na}]^+$  449.0760, found 449.0764.

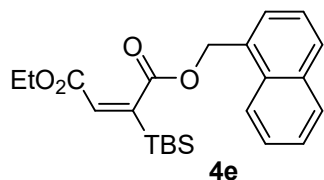

**4e:** 4-ethyl 1-(naphthalen-1-ylmethyl) 2-(*tert*-butyldimethylsilyl)maleate; isolated by column chromatography (EtOAc/petroleum ether = 1:30); colorless oil; (62.1 mg, 78% yield); <sup>1</sup>H NMR (600 MHz, CDCl<sub>3</sub>): δ 8.12 (d, *J* = 8.4 Hz, 1H), 7.88–7.84 (m, 2H), 7.59 (d, *J* = 6.6 Hz, 1H), 7.54–7.49 (m, 2H), 7.45 (t, *J* = 7.8 Hz, 1H), 6.08 (s, 1H), 5.69 (s, 2H), 4.15 (dd, *J* = 13.8, 4.2 Hz, 2H), 1.25 (t, *J* = 7.2 Hz, 3H), 0.86 (s, 9H), 0.08 (s, 6H); <sup>13</sup>C NMR (150 MHz, CDCl<sub>3</sub>): δ 170.9, 163.9, 153.5, 133.7, 130.8, 128.5, 128.0, 126.4, 125.9, 125.2, 124.1, 65.1, 61.0, 26.3, 17.4, 14.1, -6.4; HRMS (ESI) *m/z* calcd for [C<sub>23</sub>H<sub>30</sub>O<sub>4</sub>Si + Na]<sup>+</sup> 421.1811, found 421.1804.

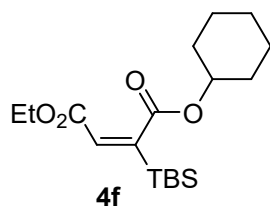

**4f:** 1-cyclohexyl 4-ethyl 2-(*tert*-butyldimethylsilyl)maleate; isolated by column chromatography (EtOAc/petroleum ether = 1:30); colorless oil; (47.6 mg, 70% yield); <sup>1</sup>H NMR (400 MHz, CDCl<sub>3</sub>): δ 6.04 (s, 1H), 4.93–4.89 (m, 1H), 4.17 (d, *J* = 7.2 Hz, 2H), 1.97–1.94 (m, 2H), 1.75–1.71 (m, 2H), 1.56–1.49 (m, 2H), 1.47–1.40 (m, 2H), 1.39–1.33 (m, 2H), 1.27 (t, *J* = 7.2 Hz, 3H), 0.94 (s, 9H), 0.16 (s, 6H); <sup>13</sup>C NMR (101 MHz, CDCl<sub>3</sub>): δ 170.3, 163.8, 153.9, 130.1, 73.4, 60.8, 31.6, 26.4, 25.4, 23.9, 17.4, 14.1, -6.3; HRMS (ESI) *m/z* calcd for [C<sub>18</sub>H<sub>32</sub>O<sub>4</sub>Si + Na]<sup>+</sup> 363.1968, found 363.1966.

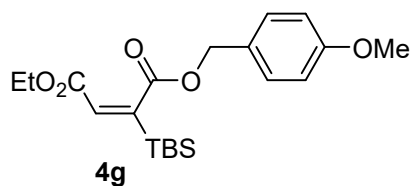

**4g:** 4-ethyl 1-(4-methoxybenzyl) 2-(*tert*-butyldimethylsilyl)maleate; isolated by column chromatography (EtOAc/petroleum ether = 1:30); colorless oil; (66.5 mg, 88% yield);

$^1\text{H}$  NMR (600 MHz,  $\text{CDCl}_3$ ):  $\delta$  7.33 (d,  $J=8.4$  Hz, 2H), 6.87 (d,  $J=9.0$  Hz, 2H), 6.07 (s, 1H), 5.17 (s, 2H), 4.16 (dd,  $J=14.4, 7.2$  Hz, 2H), 3.80 (s, 3H), 1.26 (t,  $J=7.2$  Hz, 3H), 0.90 (s, 9H), 0.12 (s, 6H);  $^{13}\text{C}$  NMR (150 MHz,  $\text{CDCl}_3$ ):  $\delta$  170.8, 163.8, 159.6, 153.4, 130.59, 130.57, 127.7, 113.8, 66.6, 60.9, 55.2, 26.3, 17.4, 14.1, -6.4 ; HRMS (ESI)  $m/z$  calcd for  $[\text{C}_{20}\text{H}_{30}\text{O}_5\text{Si} + \text{Na}]^+$  401.1760, found 401.1760.

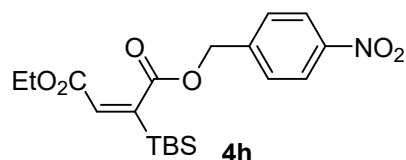

**4h:** 4-ethyl 1-(4-nitrobenzyl) 2-(*tert*-butyldimethylsilyl)maleate; isolated by column chromatography (EtOAc/petroleum ether = 1:30); colorless oil; (63.6 mg, 81% yield);  $^1\text{H}$  NMR (600 MHz,  $\text{CDCl}_3$ ):  $\delta$  8.20 (d,  $J=3$  Hz, 2H), 7.57 (d,  $J=8.4$  Hz, 2H), 6.12 (s, 1H), 5.31 (s, 2H), 4.16 (dd,  $J=14.4, 7.2$  Hz, 2H), 1.26 (t,  $J=7.2$  Hz, 3H), 0.91 (s, 9H), 0.14 (s, 6H);  $^{13}\text{C}$  NMR (150 MHz,  $\text{CDCl}_3$ ):  $\delta$  170.6, 163.7, 153.1, 147.7, 142.9, 131.1, 129.0, 123.6, 65.2, 60.1, 26.3, 17.4, 14.0, -6.4; HRMS (ESI)  $m/z$  calcd for  $[\text{C}_{19}\text{H}_{27}\text{NO}_6\text{Si} + \text{Na}]^+$  416.1505, found 416.1498.

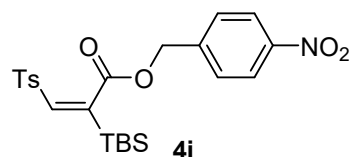

**4i:** 4-nitrobenzyl (*E*)-2-(*tert*-butyldimethylsilyl)-3-tosylacrylate; isolated by column chromatography (EtOAc/petroleum ether = 1:30); colorless oil; (50 mg, 53% yield);  $^1\text{H}$  NMR (600 MHz,  $\text{CDCl}_3$ ):  $\delta$  8.24 (d,  $J=8.0$  Hz, 2H), 7.79 (d,  $J=7.7$  Hz, 2H), 7.64 (d,  $J=8.1$  Hz, 2H), 7.32 (d,  $J=7.9$  Hz, 2H), 6.39 (s, 1H), 3.84 (s, 2H), 2.44 (s, 3H), 0.86 (s, 9H), 0.12 (s, 6H);  $^{13}\text{C}$  NMR (150 MHz,  $\text{CDCl}_3$ ):  $\delta$  168.6, 148.9, 148.0, 145.2, 142.5, 138.4, 136.6, 130.2, 129.5, 128.2, 123.9, 66.1, 26.4, 21.8, 17.9, -6.2; HRMS (ESI)  $m/z$  calcd for  $[\text{C}_{23}\text{H}_{29}\text{NO}_6\text{SSi} + \text{Na}]^+$  498.1377, found 498.1342.

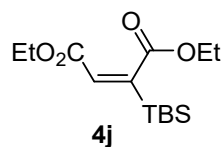

**4j:** diethyl 2-(*tert*-butyldimethylsilyl)maleate; isolated by column chromatography (EtOAc/petroleum ether = 1:30); colorless oil; (48.5 mg, 82% yield); <sup>1</sup>H NMR (600 MHz, CDCl<sub>3</sub>): δ 6.07 (s, 1H), 4.27 (dd, *J* = 7.2, 14.4 Hz, 2H), 4.18 (dd, *J* = 14.4, 7.2 Hz, 2H), 1.31 (t, *J* = 6.6 Hz, 3H), 1.28 (t, *J* = 7.2 Hz, 3H), 0.94 (s, 9H), 0.16 (s, 6H); <sup>13</sup>C NMR (150 MHz, CDCl<sub>3</sub>): δ 170.9, 163.9, 153.8, 130.4, 60.9, 60.8, 26.4, 17.4, 14.11, 14.07, -6.4; HRMS (ESI) *m/z* calcd for [C<sub>14</sub>H<sub>26</sub>O<sub>4</sub>Si + Na]<sup>+</sup> 309.1498, found 309.1503.

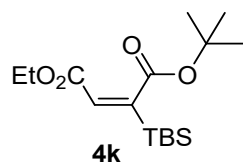

**4k:** 1-(*tert*-butyl) 4-ethyl 2-(*tert*-butyldimethylsilyl)maleate; isolated by column chromatography (EtOAc/petroleum ether = 1:30); colorless oil; (30.8 mg, 72% yield); <sup>1</sup>H NMR (600 MHz, CDCl<sub>3</sub>): δ 6.00 (s, 1H), 4.20 (dd, *J* = 14.4, 7.2 Hz, 2H), 1.53 (s, 9H), 1.28 (t, *J* = 7.2 Hz, 3H), 0.95 (s, 9H), 0.17 (s, 6H); <sup>13</sup>C NMR (150 MHz, CDCl<sub>3</sub>): δ 169.7, 163.9, 154.2, 129.6, 81.8, 60.7, 28.2, 26.5, 17.5, 14.2, -6.2; HRMS (ESI) *m/z* calcd for [C<sub>16</sub>H<sub>30</sub>O<sub>4</sub>Si + Na]<sup>+</sup> 337.1811, found 337.1803.

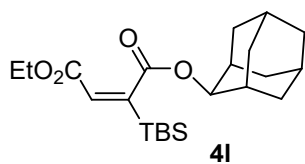

**4l:** 1-(adamantan-2-yl) 4-ethyl 2-(*tert*-butyldimethylsilyl)maleate; isolated by column chromatography (EtOAc/petroleum ether = 1:30); colorless oil; (39.2 mg, 50% yield); <sup>1</sup>H NMR (600 MHz, CDCl<sub>3</sub>): δ 6.05 (s, 1H), 5.11–5.10 (m, 1H), 4.15 (dd, *J* = 14.4, 7.2 Hz, 2H), 2.07 (s, 2H), 1.99 (d, *J* = 12.6 Hz, 2H), 1.85–1.79 (m, 6H), 1.71 (s, 2H), 1.25 (d, *J* = 12 Hz, 2H), 1.99 (t, *J* = 6.6 Hz, 3H), 0.94 (s, 9H), 0.16 (s, 6H); <sup>13</sup>C NMR (150 MHz, CDCl<sub>3</sub>): δ 170.2, 163.7, 153.9, 130.0, 60.7, 37.4, 36.4, 31.71, 31.69, 27.2, 27.0,



26.4, 17.4, 14.1, -6.3; HRMS (ESI)  $m/z$  calcd for  $[C_{22}H_{36}O_4Si + Na]^+$  415.2281, found 415.2272.

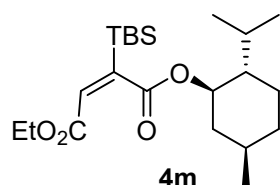

**4m:** 4-ethyl 1-((1*R*,2*S*,6*R*)-2-isopropyl-6-methylcyclohexyl) 2-(*tert*-butyldimethylsilyl)maleate; isolated by column chromatography (EtOAc/petroleum ether = 1:30); colorless oil; (44.1 mg, 56% yield);  $^1H$  NMR (600 MHz,  $CDCl_3$ ):  $\delta$  6.04 (s, 1H), 4.78–4.73 (m, 1H), 4.16 (dd,  $J = 14.4, 7.2$  Hz, 2H), 2.27–2.25 (m, 1H), 2.03–1.98 (m, 1H), 1.68–1.65 (m, 2H), 1.51–1.44 (m, 1H), 1.38–1.33 (m, 1H), 1.25 (t,  $J = 7.2$  Hz, 3H), 1.08–1.01 (m, 1H), 1.08–1.01 (m, 1H), 0.93–0.76 (m, 17H), 0.93 (s, 9H), 0.89 (d,  $J = 6.6$  Hz, 3H), 0.85 (d,  $J = 7.2$  Hz, 3H), 0.76 (d,  $J = 7.2$  Hz, 3H), 0.14 (d,  $J = 3.6$  Hz, 6H);  $^{13}C$  NMR (150 MHz,  $CDCl_3$ ):  $\delta$  169.3, 162.7, 152.3, 129.6, 59.7, 46.1, 39.5, 33.3, 30.4, 25.5, 21.1, 20.0, 16.5, 14.9, 13.2, -7.1, -7.2; HRMS (ESI)  $m/z$  calcd for  $[C_{22}H_{40}O_4Si + Na]^+$  419.2594, found 419.2588.

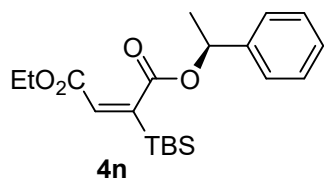

**4n:** (*S*)-4-ethyl-1-(1-phenylethyl)-2-(*tert*-butyldimethylsilyl)maleate; isolated by column chromatography (EtOAc/petroleum ether = 1:30); colorless oil; (44.2 mg, 61% yield);  $^1H$  NMR (600 MHz,  $CDCl_3$ ):  $\delta$  7.38–7.37 (m, 2H), 7.34–7.29 (m, 2H), 7.25–7.23 (m, 1H), 6.07–6.03 (m, 1H), 4.12–4.07 (m, 1H), 4.06–4.00 (m, 1H), 1.60 (d,  $J = 6.6$  Hz, 3H), 1.17 (t,  $J = 7.2$  Hz, 3H), 0.87 (s, 9H), 0.08 (s, 3H), 0.06 (s, 3H);  $^{13}C$  NMR (150 MHz,  $CDCl_3$ ):  $\delta$  169.9, 163.7, 153.2, 141.0, 130.6, 128.2, 127.8, 126.7, 72.8, 60.8, 26.3, 21.5, 17.3, 14.0, -6.3, -6.4; HRMS (ESI)  $m/z$  calcd for  $[C_{20}H_{30}O_4Si + Na]^+$  385.1811, found 385.1812.

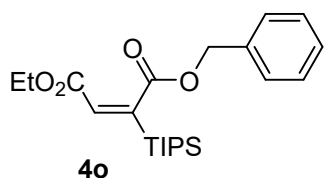

**4o:** 1-benzyl 4-ethyl 2-(triisopropylsilyl)maleate; isolated by column chromatography (EtOAc/petroleum ether = 1:30); colorless oil; (60.8 mg, 78% yield);  $^1\text{H}$  NMR (600 MHz,  $\text{CDCl}_3$ ):  $\delta$  7.37–7.35 (m, 5H), 6.12 (s, 1H), 5.22 (s, 2H), 4.19 (dd,  $J=14.4$ , 7.2 Hz, 2H), 1.31–1.26 (m, 6H), 1.06 (d,  $J = 7.8$  Hz, 18H);  $^{13}\text{C}$  NMR (150 MHz,  $\text{CDCl}_3$ ):  $\delta$  164.7, 164.0, 150.5, 134.8, 128.64, 128.61, 106.2, 67.8, 60.0, 18.3, 18.0, 17.7, 14.3, 13.7; HRMS (ESI)  $m/z$  calcd for  $[\text{C}_{22}\text{H}_{34}\text{O}_4\text{Si} + \text{Na}]^+$  413.2124, found 413.2125.

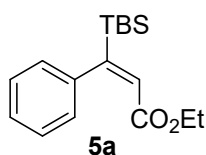

**5a:** ethyl (*E*)-3-(*tert*-butyldimethylsilyl)-3-phenylacrylate; isolated by column chromatography (EtOAc/petroleum ether = 1:30); colorless oil; (37.7 mg, 65% yield);  $^1\text{H}$  NMR (600 MHz,  $\text{CDCl}_3$ ):  $\delta$  7.29–7.28 (m, 2H), 7.23–7.20 (m, 1H), 7.06–7.05 (m, 2H), 6.38 (s, 1H), 4.20 (dd,  $J=14.4$ , 7.2 Hz, 2H), 1.31 (t,  $J = 7.2$  Hz, 3H), 0.95 (s, 9H), 0.11 (s, 6H);  $^{13}\text{C}$  NMR (150 MHz,  $\text{CDCl}_3$ ):  $\delta$  166.6, 161.6, 146.4, 135.1, 127.8, 126.9, 126.3, 60.3, 28.1, 18.7, 14.3, -2.8 ; HRMS (ESI)  $m/z$  calcd for  $[\text{C}_{17}\text{H}_{26}\text{O}_2\text{Si} + \text{Na}]^+$  313.1600, found 313.1594.

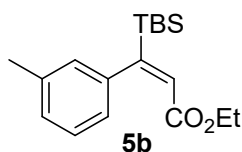

**5b:** ethyl (*E*)-3-(*tert*-butyldimethylsilyl)-3-(*m*-tolyl)acrylate; isolated by column chromatography (EtOAc/petroleum ether = 1:30); colorless oil; (38.3 mg, 63% yield);  $^1\text{H}$  NMR (600 MHz,  $\text{CDCl}_3$ ):  $\delta$  7.17 (t,  $J = 7.2$  Hz, 1H), 7.01 (d,  $J = 7.2$  Hz, 1H), 6.79–6.78 (m, 2H), 7.25 (s, 1H), 3.96 (dd,  $J=14.4$ , 7.2 Hz, 2H), 2.33 (s, 3H), 1.01 (t,  $J = 7.2$  Hz, 3H), 0.84 (s, 9H), 0.14 (s, 6H);  $^{13}\text{C}$  NMR (150 MHz,  $\text{CDCl}_3$ ):  $\delta$  165.4, 161.1,

142.3, 137.0, 127.5, 126.8, 126.7, 123.3, 59.8, 26.9, 21.5, 17.5, 13.8, -5.7; HRMS (ESI)  $m/z$  calcd for  $[C_{18}H_{28}O_2Si + Na]^+$  327.1756, found 327.1749.

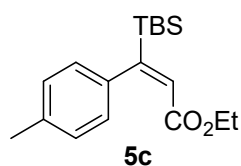

**5c:** ethyl (*E*)-3-(*tert*-butyldimethylsilyl)-3-(*p*-tolyl)acrylate; isolated by column chromatography (EtOAc/petroleum ether = 1:30); colorless oil; (48.6 mg, 80% yield);  $^1H$  NMR (600 MHz,  $CDCl_3$ ):  $\delta$  7.09 (d,  $J = 7.8$  Hz, 2H), 6.87 (d,  $J = 7.8$  Hz, 2H), 6.25 (s, 1H), 3.98 (dd,  $J = 14.4, 7.2$  Hz, 2H), 2.33 (s, 3H), 1.05 (t,  $J = 7.2$  Hz, 3H), 0.83 (s, 9H), 0.14 (s, 6H);  $^{13}C$  NMR (150 MHz,  $CDCl_3$ ):  $\delta$  165.3, 161.5, 139.2, 135.5, 130.0, 128.4, 126.1, 59.9, 26.9, 21.2, 17.5, 13.9, -5.7; HRMS (ESI)  $m/z$  calcd for  $[C_{18}H_{28}O_2Si + Na]^+$  327.1756, found 327.1759.

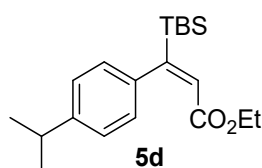

**5d:** ethyl (*E*)-3-(*tert*-butyldimethylsilyl)-3-(4-isopropylphenyl)acrylate; isolated by column chromatography (EtOAc/petroleum ether = 1:30); colorless oil; (48.5 mg, 73% yield);  $^1H$  NMR (600 MHz,  $CDCl_3$ ):  $\delta$  7.13 (d,  $J = 7.8$  Hz, 2H), 6.99–6.97 (m, 2H), 6.38 (s, 1H), 4.19 (dd,  $J = 14.4, 7.2$  Hz, 2H), 2.91–2.86 (m, 1H), 1.30 (t,  $J = 7.2$  Hz, 3H), 1.25 (d,  $J = 7.2$  Hz, 6H), 0.95 (s, 9H), 0.11 (s, 6H);  $^{13}C$  NMR (150 MHz,  $CDCl_3$ ):  $\delta$  166.7, 161.6, 146.9, 143.7, 134.9, 126.9, 125.7, 60.3, 33.6, 28.2, 24.0, 18.7, 14.3, -2.7; HRMS (ESI)  $m/z$  calcd for  $[C_{20}H_{32}O_2Si + Na]^+$  355.2069, found 355.2065.

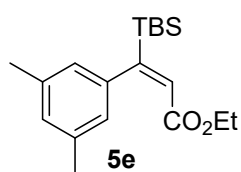

**5e:** ethyl (*E*)-3-(*tert*-butyldimethylsilyl)-3-(3,5-dimethylphenyl)acrylate; isolated by column chromatography (EtOAc/petroleum ether = 1:30); colorless oil; (30.8 mg, 50%

yield);  $^1\text{H}$  NMR (600 MHz,  $\text{CDCl}_3$ ):  $\delta$  6.83 (s, 1H), 6.59 (s, 2H), 6.23 (s, 1H), 3.97 (dd,  $J=14.4, 7.2$  Hz, 2H), 2.28 (s, 6H), 1.02 (t,  $J = 7.2$  Hz, 3H), 0.84 (s, 9H), 0.13 (s, 6H);  $^{13}\text{C}$  NMR (150 MHz,  $\text{CDCl}_3$ ):  $\delta$  165.5, 161.1, 142.2, 136.9, 129.9, 127.6, 123.9, 59.8, 26.9, 21.3, 17.5, 13.8, -5.6; HRMS (ESI)  $m/z$  calcd for  $[\text{C}_{20}\text{H}_{32}\text{O}_2\text{Si} + \text{Na}]^+$  341.1913, found 341.1906.

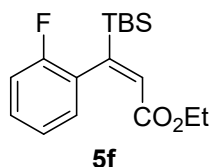

**5f:** ethyl (*E*)-3-(*tert*-butyldimethylsilyl)-3-(2-fluorophenyl)acrylate; isolated by column chromatography (EtOAc/petroleum ether = 1:30); colorless oil; (27 mg, 45% yield);  $^1\text{H}$  NMR (600 MHz,  $\text{CDCl}_3$ ):  $\delta$  7.21–7.18 (m, 1H), 7.09–7.05 (m, 1H), 7.03–7.00 (m, 1H), 6.95–6.93 (m, 1H), 6.36 (s, 1H), 3.99 (dd,  $J = 13.8, 7.2$  Hz, 2H), 1.05 (t,  $J = 7.2$  Hz, 3H), 0.88 (s, 9H), 0.13 (s, 6H);  $^{13}\text{C}$  NMR (150 MHz,  $\text{CDCl}_3$ ):  $\delta$  165.5, 161.1, 142.2, 138.4 ( $J_{\text{C-F}} = 478.5$ ), 136.9, 130.0, 127.6, 127.4, 123.9, 59.8, 26.9, 21.3, 17.5, 13.8, -5.6; HRMS (ESI)  $m/z$  calcd for  $[\text{C}_{17}\text{H}_{25}\text{FO}_2\text{Si} + \text{Na}]^+$  331.1506, found 331.1508.

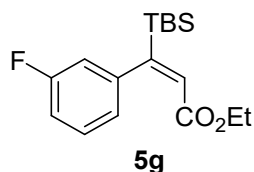

**5g:** ethyl (*E*)-3-(*tert*-butyldimethylsilyl)-3-(3-fluorophenyl)acrylate; isolated by column chromatography (EtOAc/petroleum ether = 1:30); colorless oil; (37.0 mg, 60% yield);  $^1\text{H}$  NMR (600 MHz,  $\text{CDCl}_3$ ):  $\delta$  7.30–7.27 (m, 1H), 6.95–6.91 (m, 1H), 6.79–6.78 (m, 1H), 6.74–6.72 (m, 1H), 6.30 (s, 1H), 4.00 (dd,  $J = 14.4, 7.2$  Hz, 2H), 1.07 (t,  $J = 7.2$  Hz, 3H), 0.88 (s, 9H), 0.17 (s, 6H);  $^{13}\text{C}$  NMR (150 MHz,  $\text{CDCl}_3$ ):  $\delta$  165.0, 162.4 ( $J_{\text{C-F}} = 244.5$ ), 159.8, 144.7 ( $J_{\text{C-F}} = 7.5$ ), 130.8, 129.2 ( $J_{\text{C-F}} = 9.0$ ), 122.0 ( $J_{\text{C-F}} = 3.0$ ), 113.3 ( $J_{\text{C-F}} = 21.0$ ), 112.8 ( $J_{\text{C-F}} = 19.5$ ), 60.1, 26.8, 17.5, 13.8, 1.00, -5.7; HRMS (ESI)  $m/z$  calcd for  $[\text{C}_{17}\text{H}_{25}\text{FO}_2\text{Si} + \text{Na}]^+$  331.1506, found 331.1507.

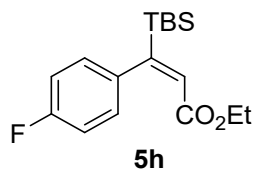

**5h:** ethyl (*E*)-3-(*tert*-butyldimethylsilyl)-3-(4-fluorophenyl)acrylate; isolated by column chromatography (EtOAc/petroleum ether = 1:30); colorless oil; (42.5 mg, 69% yield); <sup>1</sup>H NMR (600 MHz, CDCl<sub>3</sub>): δ 7.05–6.98 (m, 2H), 6.95–6.93 (m, 2H), 6.27 (s, 1H), 3.97 (dd, *J* = 14.4, 7.2 Hz, 2H), 1.05 (t, *J* = 7.2 Hz, 3H), 0.83 (s, 9H), 0.13 (s, 6H); <sup>13</sup>C NMR (150 MHz, CDCl<sub>3</sub>): δ 165.1, 161.5 (*J*<sub>C-F</sub> = 243.0 Hz), 160.2, 138.1 (*J*<sub>C-F</sub> = 3.0 Hz), 130.8, 127.8 (*J*<sub>C-F</sub> = 7.5 Hz), 114.7 (*J*<sub>C-F</sub> = 21.0 Hz), 60.0, 26.8, 17.5, 13.9, -5.7; HRMS (ESI) *m/z* calcd for [C<sub>17</sub>H<sub>25</sub>FO<sub>2</sub>Si + Na]<sup>+</sup> 331.1506, found 331.1501.

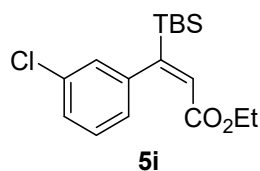

**5i:** ethyl (*E*)-3-(*tert*-butyldimethylsilyl)-3-(3-chlorophenyl)acrylate; isolated by column chromatography (EtOAc/petroleum ether = 1:30); colorless oil; (42.1 mg, 65% yield); <sup>1</sup>H NMR (600 MHz, CDCl<sub>3</sub>): δ 7.23–7.17 (m, 2H), 6.98–6.97 (m, 1H), 6.87–6.86 (m, 1H), 6.27 (s, 1H), 3.97 (dd, *J* = 14.4, 7.2 Hz, 2H), 1.03 (t, *J* = 7.2 Hz, 3H), 0.85 (s, 9H), 0.13 (s, 6H); <sup>13</sup>C NMR (150 MHz, CDCl<sub>3</sub>): δ 165.0, 159.6, 144.3, 133.6, 129.0, 126.2, 126.1, 124.5, 60.1, 26.9, 17.6, 13.8, -5.7; HRMS (ESI) *m/z* calcd for [C<sub>17</sub>H<sub>25</sub>ClO<sub>2</sub>Si + Na]<sup>+</sup> 347.1210, found 347.1211.

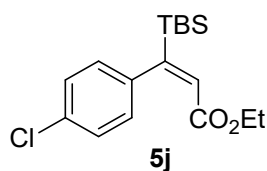

**5j:** ethyl (*E*)-3-(*tert*-butyldimethylsilyl)-3-(4-chlorophenyl)acrylate; isolated by column chromatography (EtOAc/petroleum ether = 1:30); colorless oil; (42.1 mg, 65% yield); <sup>1</sup>H NMR (600 MHz, CDCl<sub>3</sub>): δ 7.27–7.26 (m, 2H), 7.01–7.00 (m, 2H), 6.37 (s, 1H), 4.21 (dd, *J* = 14.4, 7.2 Hz, 2H), 1.32 (t, *J* = 7.2 Hz, 3H), 0.95 (s, 9H), 0.11 (s, 6H);

$^{13}\text{C}$  NMR (150 MHz,  $\text{CDCl}_3$ ):  $\delta$  166.4, 160.3, 144.8, 135.6, 132.3, 128.3, 128.0, 60.5, 28.1, 18.8, 14.2, -2.8; HRMS (ESI)  $m/z$  calcd for  $[\text{C}_{17}\text{H}_{25}\text{ClO}_2\text{Si} + \text{Na}]^+$  347.1210, found 347.1207.

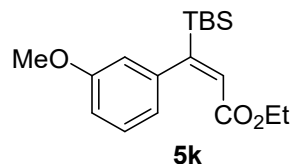

**5k:** ethyl (*E*)-3-(*tert*-butyldimethylsilyl)-3-(3-methoxyphenyl)acrylate; isolated by column chromatography (EtOAc/petroleum ether = 1:30); colorless oil; (33.3 mg, 52% yield);  $^1\text{H}$  NMR (600 MHz,  $\text{CDCl}_3$ ):  $\delta$  7.19 (t,  $J = 7.8$  Hz, 2H), 6.77–6.75 (m, 1H), 6.65–6.64 (m, 1H), 6.60–6.59 (m, 1H), 6.39 (s, 1H), 4.20 (dd,  $J = 14.4, 7.2$  Hz, 2H), 3.80 (s, 3H), 1.30 (t,  $J = 7.2$  Hz, 3H), 0.95 (s, 9H), 0.11 (s, 6H);  $^{13}\text{C}$  NMR (150 MHz,  $\text{CDCl}_3$ ):  $\delta$  166.6, 161.3, 159.0, 147.8, 135.0, 128.8, 119.4, 112.6, 111.7, 60.4, 55.2, 28.2, 18.8, 14.3, -2.8; HRMS (ESI)  $m/z$  calcd for  $[\text{C}_{18}\text{H}_{28}\text{O}_3\text{Si} + \text{Na}]^+$  342.1705, found 342.1702.

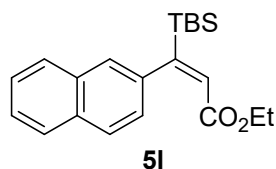

**5l:** ethyl (*E*)-3-(*tert*-butyldimethylsilyl)-3-(naphthalen-2-yl)acrylate; isolated by column chromatography (EtOAc/petroleum ether = 1:30); colorless oil; (35.3 mg, 52% yield);  $^1\text{H}$  NMR (600 MHz,  $\text{CDCl}_3$ ):  $\delta$  7.83–7.79 (m, 2H), 7.77–7.75 (m, 1H), 7.50 (s, 1H), 7.49–7.44 (m, 2H), 7.23–7.21 (m, 1H), 6.47 (s, 1H), 4.23 (dd,  $J = 13.8, 6.6$  Hz, 2H), 1.32 (t,  $J = 7.2$  Hz, 3H), 0.98 (s, 9H), 0.14 (s, 6H);  $^{13}\text{C}$  NMR (150 MHz,  $\text{CDCl}_3$ ):  $\delta$  166.6, 161.7, 144.1, 135.5, 133.1, 132.0, 127.8, 127.6, 127.2, 126.2, 125.9, 125.6, 125.0, 60.4, 28.2, 18.8, 14.3, -2.7; HRMS (ESI)  $m/z$  calcd for  $[\text{C}_{21}\text{H}_{28}\text{O}_2\text{Si} + \text{H}]^+$  363.1756, found 363.1760.

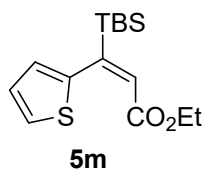

**5m:** ethyl (*E*)-3-(*tert*-butyldimethylsilyl)-3-(thiophen-2-yl)acrylate; isolated by column chromatography (EtOAc/petroleum ether = 1:30); colorless oil; (23 mg, 38% yield); <sup>1</sup>H NMR (600 MHz, CDCl<sub>3</sub>): δ 7.24 (d, *J* = 5.0 Hz, 1H), 6.97 (t, *J* = 3.7 Hz, 1H), 6.72 (d, *J* = 3.1 Hz, 1H), 6.28 (s, 1H), 4.04 (q, *J* = 7.0 Hz, 2H), 1.10 (t, *J* = 7.1 Hz, 3H), 0.83 (s, 9H), 0.20 (s, 6H), 0.07 (s, 6H); <sup>13</sup>C NMR (150 MHz, CDCl<sub>3</sub>): δ 165.7, 151.8, 142.4, 132.8, 127.0, 124.8, 124.6, 60.4, 26.9, 17.6, 14.1, -5.5; HRMS (ESI) *m/z* calcd for [C<sub>15</sub>H<sub>24</sub>O<sub>2</sub>SSi + H]<sup>+</sup> 297.1339, found 297.1347.

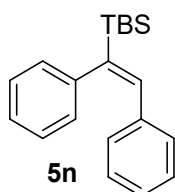

**5n:** (*E*)-*tert*-butyl(1,2-diphenylvinyl)dimethylsilane; isolated by column chromatography (EtOAc/petroleum ether = 1:100); colorless oil; (35.3 mg, 60% yield); <sup>1</sup>H NMR (600 MHz, CDCl<sub>3</sub>): δ 7.28–7.24 (m, 3H), 7.21–7.16 (m, 2H), 7.08–7.05 (m, 3H), 7.03–7.01 (m, 2H), 6.92–6.91 (m, 2H), 6.84 (s, 1H), 0.86 (s, 9H), 0.15 (s, 6H); <sup>13</sup>C NMR (150 MHz, CDCl<sub>3</sub>): δ 147.1, 145.0, 144.4, 139.8, 137.4, 129.5, 128.5, 127.9, 127.8, 127.7, 126.9, 125.6, 27.1, -5.2; HRMS (ESI) *m/z* calcd for [C<sub>20</sub>H<sub>26</sub>Si + H]<sup>+</sup> 295.1882, found 295.1877.

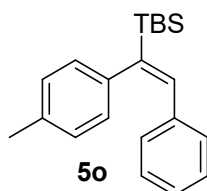

**5o:** (*E*)-*tert*-butyldimethyl(2-phenyl-1-(*p*-tolyl)vinyl)silane; isolated by column chromatography (EtOAc/petroleum ether = 1:100); colorless oil; (48.2 mg, 62% yield);

$^1\text{H}$  NMR (600 MHz,  $\text{CDCl}_3$ ):  $\delta$  7.32–7.27 (m, 1H), 7.10–7.08 (m, 4H), 6.95–6.94 (m, 2H), 6.92–6.91 (m, 2H), 6.83 (s, 1H), 2.34 (s, 3H), 0.87 (s, 9H), 0.15 (s, 6H);  $^{13}\text{C}$  NMR (150 MHz,  $\text{CDCl}_3$ ):  $\delta$  145.0, 139.7, 135.0, 129.5, 129.2, 128.6, 128.4, 127.80, 127.78, 126.8, 27.1, 21.2, 17.9, -5.2 ; HRMS (ESI)  $m/z$  calcd for  $[\text{C}_{21}\text{H}_{28}\text{Si} + \text{Na}]^+$  331.1858, found 331.1845.

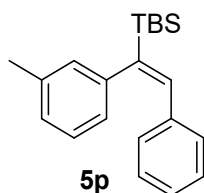

**5p:** (*E*)-*tert*-butyldimethyl(2-phenyl-1-(*m*-tolyl)vinyl)silane; isolated by column chromatography (EtOAc/petroleum ether = 1:100); colorless oil; (33.4 mg, 54% yield);  $^1\text{H}$  NMR (600 MHz,  $\text{CDCl}_3$ ):  $\delta$  7.31–7.28 (m, 1H), 7.18–7.15 (m, 1H), 7.10–7.08 (m, 2H), 7.07–6.99 (m, 1H), 6.95–6.94 (m, 2H), 6.86 (s, 1H), 6.83–6.82 (m, 2H), 2.30 (s, 3H), 0.88 (s, 9H), 0.15 (s, 6H);  $^{13}\text{C}$  NMR (150 MHz,  $\text{CDCl}_3$ ):  $\delta$  145.2, 143.3, 139.5, 137.9, 137.5, 129.5, 128.4, 128.3, 127.8, 126.9, 126.3, 124.9, 27.1, 21.5, 17.9, -5.2 ; HRMS (ESI)  $m/z$  calcd for  $[\text{C}_{21}\text{H}_{28}\text{Si} + \text{H}]^+$  309.2039, found 309.2043.

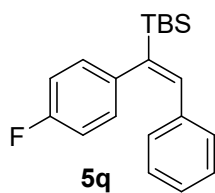

**5q:** (*E*)-*tert*-butyl(1-(4-fluorophenyl)-2-phenylvinyl)dimethylsilane; isolated by column chromatography (EtOAc/petroleum ether = 1:100); colorless oil; (36.2 mg, 58% yield);  $^1\text{H}$  NMR (600 MHz,  $\text{CDCl}_3$ ):  $\delta$  7.33–7.28 (m, 1H), 7.12–7.11 (m, 1H), 7.10–6.98 (m, 4H), 6.94–6.93 (m, 2H), 6.88 (s, 1H), 0.87 (s, 9H), 0.17 (s, 6H);  $^{13}\text{C}$  NMR (150 MHz,  $\text{CDCl}_3$ ):  $\delta$  161.2 ( $J_{\text{C-F}} = 243.0$  Hz), 147.6, 143.9, 140.5, 139.1 ( $J_{\text{C-F}} = 3.0$  Hz), 137.2, 129.5 ( $J_{\text{C-F}} = 7.5$  Hz), 127.9, 127.1, 115.4 ( $J_{\text{C-F}} = 21.0$  Hz), 27.1, 17.9, -5.3; HRMS (ESI)  $m/z$  calcd for  $[\text{C}_{20}\text{H}_{25}\text{FSi} + \text{H}]^+$  313.1788, found 313.1800.



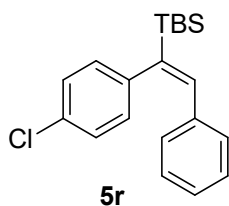

**5r:** (*E*)-*tert*-butyl(1-(4-chlorophenyl)-2-phenylvinyl)dimethylsilane; isolated by column chromatography (EtOAc/petroleum ether = 1:100); colorless oil; (42.6 mg, 65% yield); <sup>1</sup>H NMR (600 MHz, CDCl<sub>3</sub>): δ 7.31–7.27 (m, 1H), 7.25–7.25 (m, 1H), 7.15–7.11 (m, 3H), 6.98–6.96 (m, 2H), 6.94–6.93 (m, 2H), 6.87 (s, 1H), 0.87 (s, 9H), 0.16 (s, 6H); <sup>13</sup>C NMR (150 MHz, CDCl<sub>3</sub>): δ 147.6, 143.6, 141.9, 140.5, 137.1, 131.4, 129.5, 129.4, 128.7, 128.0, 127.2, 27.1, 17.9, -5.3; HRMS (ESI) *m/z* calcd for [C<sub>20</sub>H<sub>25</sub>ClSi + Na]<sup>+</sup> 351.1312, found 351.1321.

## 5. Control experiments

a) Size effect of silyl moiety

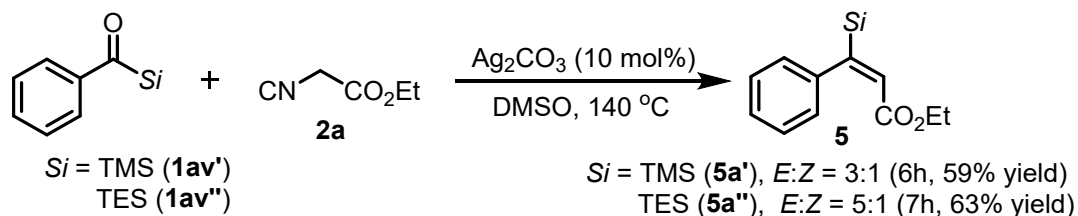

Acylsilane **1** (0.2 mmol, 1.0 eq.) and isocyanoacetate **2a** (26  $\mu$ L, 0.24 mmol) were dissolved in DMSO (2.0 mL). Then Ag<sub>2</sub>CO<sub>3</sub> (5.5 mg, 0.02 mmol) was added at room temperature. The reaction mixture was then stirred at 140 °C for appropriate time, the reaction mixture was extracted with EtOAc, and the combined organic phases were washed with brine, dried over anhydrous Na<sub>2</sub>SO<sub>4</sub>, filtered, and concentrated. The residue was purified by flash chromatography to afford the desired product.

**5a'**: ethyl (*E*)-3-phenyl-3-(trimethylsilyl)acrylate; isolated by column chromatography (EtOAc/petroleum ether = 1:30); colorless oil; (29.26 mg, 59% yield); <sup>1</sup>H NMR (600 MHz, CDCl<sub>3</sub>): δ 7.27–7.24 (m, 2H), 7.21–7.18 (m, 1H), 7.00 (d, *J* = 7.2 Hz, 2H), 6.29

(s, 1H), 4.18 (dd,  $J = 13.8, 7.2$  Hz, 2H), 1.28 (t,  $J = 7.2$  Hz, 3H), 0.14 (s, 9H);  $^{13}\text{C}$  NMR (150 MHz,  $\text{CDCl}_3$ ):  $\delta$  166.8, 165.7, 145.4, 132.9, 127.9, 126.5, 126.2, 60.4, 14.3; HRMS (ESI)  $m/z$  calcd for  $[\text{C}_{14}\text{H}_{21}\text{O}_2\text{Si} + \text{H}]^+$  249.1311, found 249.1312.

**5a''**: ethyl (*E*)-3-phenyl-3-(triethylsilyl)acrylate; isolated by column chromatography (EtOAc/petroleum ether = 1:30); colorless oil; (37.7 mg, 65% yield);  $^1\text{H}$  NMR (600 MHz,  $\text{CDCl}_3$ ):  $\delta$  7.30–7.28 (m, 2H), 7.21–7.19 (m, 1H), 6.94 (d,  $J = 7.8$  Hz, 2H), 3.95 (dd,  $J = 14.4, 7.2$  Hz, 2H), 1.02 (d,  $J = 7.2$  Hz, 3H), 0.93 (t,  $J = 7.8$  Hz, 9H), 0.64 (dd,  $J = 15.6, 7.8$  Hz, 6H);  $^{13}\text{C}$  NMR (150 MHz,  $\text{CDCl}_3$ ):  $\delta$  165.1, 161.1, 142.1, 129.1, 127.8, 125.8, 125.5, 59.9, 13.8, 7.1, 2.3.

b) Oxazoline intermediate (byproduct)

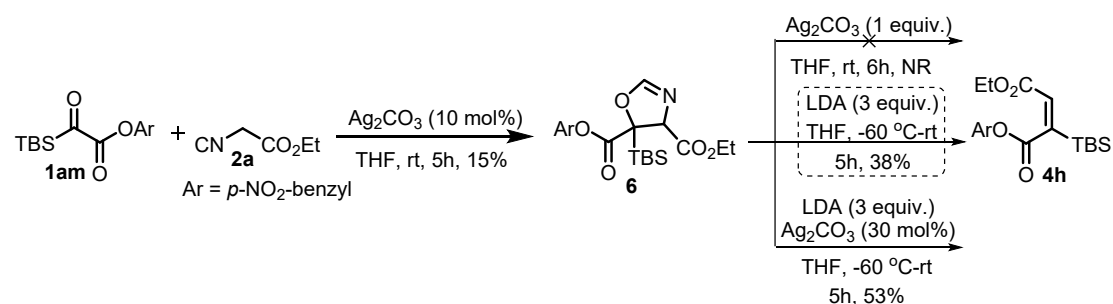

For **6**:

To a mixture of 4-nitrobenzyl 2-(*tert*-butyldimethylsilyl)-2-oxoacetate **1am** (64.6 mg, 0.2 mmol) and isocyanoacetate (**2a**) (26  $\mu\text{L}$ , 0.24 mmol) in THF (2.0 mL) was added  $\text{Ag}_2\text{CO}_3$  (5.5 mg, 0.02 mmol,) at room temperature. After stirring for 5 h, the reaction mixture was extracted with EtOAc, and the combined organic phases were washed with brine, dried over anhydrous  $\text{Na}_2\text{SO}_4$ , filtered, and concentrated. The residue was purified by flash chromatography to afford the product **6** in 15% yield.

**6**: ethyl 5-((11-oxidaneyl)carbonyl)-5-(*tert*-butyldimethylsilyl)-4,5-dihydrooxazole-4-carboxylate; isolated by column chromatography (EtOAc/petroleum ether = 1:5); colorless oil; (9.5 mg, 15% yield);  $^1\text{H}$  NMR (600 MHz,  $\text{CDCl}_3$ ):  $\delta$  8.22 (d,  $J = 9.0$  Hz,

2H), 7.53 (d,  $J = 9.0$  Hz, 2H), 7.06 (d,  $J = 1.8$  Hz, 1H), 5.24 (d,  $J = 13.2$  Hz, 1H), 5.12 (d,  $J = 1.8$  Hz, 1H), 4.85 (d,  $J = 1.8$  Hz, 1H), 4.09–4.00 (m, 1H), 1.20 (t,  $J = 7.2$  Hz, 3H), 0.90 (s, 9H), 0.21 (s, 3H), 0.08 (s, 3H);  $^{13}\text{C}$  NMR (150 MHz,  $\text{CDCl}_3$ ):  $\delta$  171.1, 169.5, 156.8, 147.8, 141.8, 128.9, 123.8, 83.7, 74.5, 65.7, 61.8, 26.7, 18.0, 13.9, -8.1, -8.8; HRMS (ESI)  $m/z$  calcd for  $[\text{C}_{20}\text{H}_{29}\text{N}_2\text{O}_7\text{Si} + \text{H}]^+$  437.1744, found 437.1751.

For **4h**:

(1) To a mixture of **6** (43.6 mg, 0.1 mmol) in THF (2.0 mL) was added  $\text{Ag}_2\text{CO}_3$  (27.5 mg, 0.1 mmol) at room temperature. The reaction mixture was then stirred for 6 h at room temperature and no reaction was detected.

(2) To a mixture of **6** (43.6 mg, 0.1 mmol) and  $\text{Ag}_2\text{CO}_3$  (8.3 mg, 0.03 mmol) in THF (2.0 mL) was added LDA (0.3 mmol) at  $-60$  °C, and the reaction mixture was then stirred at room temperature for 5 h and the desired product of **4h** was obtained in 53% yield.

c) TEMPO as additive

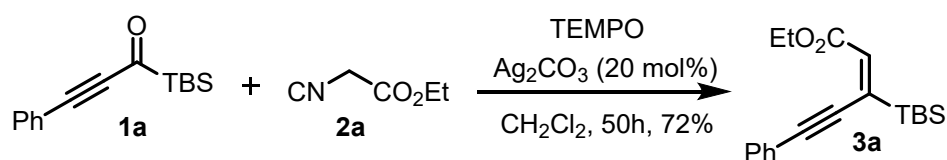

To a mixture of 1-(*tert*-butyldimethylsilyl)-3-phenylprop-2-yn-1-one (**1a**) (48 mg, 0.2 mmol), isocyanoacetate (**2a**) (26  $\mu\text{L}$ , 0.24 mmol,) and  $\text{Ag}_2\text{CO}_3$  (16.5 mg, 0.06 mmol) in  $\text{CH}_2\text{Cl}_2$  (2.0 mL) was added TEMPO (62.4 mg, 0.4 mmol) at room temperature. After stirring for 50h, the reaction mixture was extracted with EtOAc, the combined organic phases were washed with brine, dried over anhydrous  $\text{Na}_2\text{SO}_4$ , filtered, and concentrated. The residue was purified by flash chromatography (silica gel; petroleum ether: ethyl acetate = 30: 1) to afford the product **3a** in 72% yield.

d)  $\text{AgOCN}$  as additive

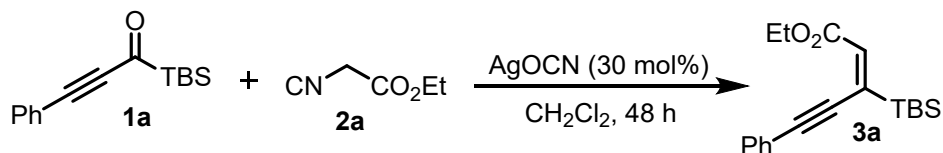

To a mixture of 1-(*tert*-butyldimethylsilyl)-3-phenylprop-2-yn-1-one (**1a**) (0.2 mmol, 48.8 mg), isocynoacetate (**2a**) (0.24 mmol, 26  $\mu$ L) in CH<sub>2</sub>Cl<sub>2</sub> (2.0 mL) was added AgOCN (0.06 mmol, 9.0 mg) at room temperature. After stirring for 48 h, the reaction mixture was extracted with EtOAc, the combined organic phases were washed with brine, dried over anhydrous Na<sub>2</sub>SO<sub>4</sub>, filtered, and concentrated. The residue was purified by flash chromatography (silica gel; petroleum ether : ethyl acetate = 30:1) to afford the product **3a** in 81% yield (*E/Z* = 6:1) (based on recovered starting materials).

## 6. Gram-Scale synthesis and further chemical transformations

### 6.1 Gram-Scale synthesis of product of **3a**

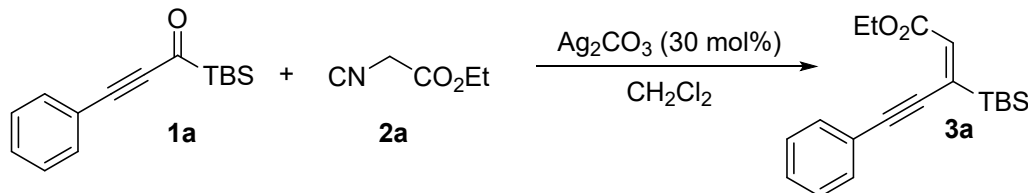

Alkynyl acylsilanes **1a** (1.0 g, 4.1 mmol) and ethyl isocynoacetate **2a** (554 mg, 4.9 mmol) were dissolved in CH<sub>2</sub>Cl<sub>2</sub> (40 mL). Then Ag<sub>2</sub>CO<sub>3</sub> (339.2 mg, 1.23 mmol) was added at room temperature. After stirring for 78h, the reaction mixture was extracted with EtOAc, the combined organic phases were washed with brine, dried over anhydrous Na<sub>2</sub>SO<sub>4</sub>, filtered, and concentrated. The residue was purified by flash chromatography to afford the product **3a** (1.004 g, 78% yield).

## 6.2 The procedure for Further Chemical Transformations

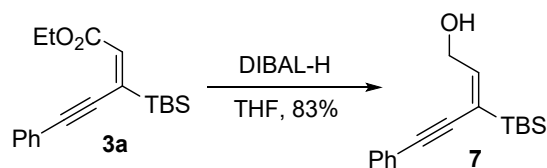

To a solution of ethyl (*E*)-3-(*tert*-butyldimethylsilyl)-5-phenylpent-2-en-4-ynoate **3a** (536 mg, 1.7 mmol) in THF (8 mL) was added dropwise a solution of diisobutylaluminium hydride (3.3 mL, 5mmol, 1.5 M in hexane) at -78 °C under argon. After stirring for 20 min at 0 °C, diethyl ether and water were successively added at 0 °C. After stirring for 2h, the mixture was filtered through celite pad. The filtrate was dried over Na<sub>2</sub>SO<sub>4</sub>, filtered and concentrated. The resulting residue was chromatographed over silica gel to yield 385 mg (83%) of the alcohol **7**.

**7**: (*E*)-3-(*tert*-butyldimethylsilyl)-5-phenylpent-2-en-4-yn-1-ol; isolated by column chromatography (EtOAc/petroleum ether = 1:5); yellow oil; (147 mg, 83% yield); <sup>1</sup>H NMR (600 MHz, CDCl<sub>3</sub>): δ 7.50–7.48 (m, 2H), 7.33–7.30 (m, 3H), 6.36 (s, 1H), 1.01 (s, 9H), 0.28 (s, 6H); <sup>13</sup>C NMR (150 MHz, CDCl<sub>3</sub>): δ 168.8, 144.0, 133.6, 131.8, 129.1, 128.4, 123.3, 110.1, 89.6, 26.6, 17.5, -6.4; HRMS (ESI) m/z calcd for [C<sub>17</sub>H<sub>24</sub>OSi + Na]<sup>+</sup> 295.1494, found 295.1491.

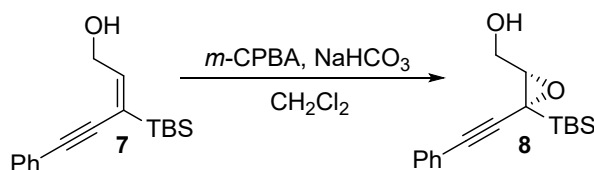

(*E*)-3-(*tert*-butyldimethylsilyl)-5-phenylpent-2-en-4-yn-1-ol **7** (43.0 mg, 0.158 mmol) was dissolved in CH<sub>2</sub>Cl<sub>2</sub> (2 mL). Then, NaHCO<sub>3</sub> (31.8 mg, 0.379 mmol) was added, followed by *m*CPBA (58.7 mg, 0.34 mmol). After stirring for 2 hours at room temperature, then the reaction was quenched with a saturated aqueous Na<sub>2</sub>SO<sub>3</sub> (2 mL). The aqueous phase was extracted with CH<sub>2</sub>Cl<sub>2</sub> (2 x 20 mL) and the organic fractions were combined, dried over Na<sub>2</sub>SO<sub>4</sub> and filtered. The solvent was evaporated under

reduced pressure and the resulting residue was chromatographed over silicagel to give epoxide **8**.

**8**: ((2*S*,3*S*)-3-(*tert*-butyldimethylsilyl)-3-(phenylethynyl)oxiran-2-yl)methanol; isolated by column chromatography (EtOAc/petroleum ether = 1:10); yellow oil; (37.8 mg, 83% yield); <sup>1</sup>H NMR (600 MHz, CDCl<sub>3</sub>): δ 7.40–7.39 (m, 2H), 7.31–7.29 (m, 3H), 4.08–3.98 (m, 2H), 3.26 (dd, *J* = 6, 4.8 Hz, 1H), 1.06 (s, 9H), 0.17 (s, 3H), 0.08 (s, 3H); <sup>13</sup>C NMR (150 MHz, CDCl<sub>3</sub>): δ 131.6, 128.5, 128.3, 122.5, 87.1, 87.0, 63.4, 60.8, 47.8, 27.0, 17.5, -8.1, -8.2; HRMS (ESI) *m/z* calcd for [C<sub>17</sub>H<sub>24</sub>NaO<sub>2</sub>Si + Na]<sup>+</sup> 311.1443, found 311.1440.

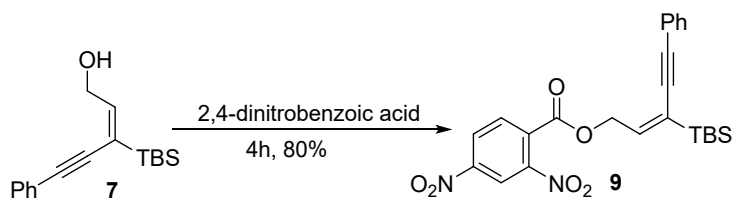

To a solution of (*E*)-3-(*tert*-butyldimethylsilyl)-5-phenylpent-2-en-4-yn-1-ol **7** (239.4 mg, 0.88 mmol) in dry CH<sub>2</sub>Cl<sub>2</sub> (8 mL), were added 2,4-dinitrobenzoic acid (212.1 mg, 1.0 mmol), 4-dimethylaminopyridine (206 mg, 1.0 mmol) and dicyclohexylcarbodiimide (10.7 mg, 0.088 mmol). After stirring for 4h, the reaction was extracted with CH<sub>2</sub>Cl<sub>2</sub> and the organic fractions were dried over Na<sub>2</sub>SO<sub>4</sub>, filtered and concentrated. The resulting residue was chromatographed over silicagel to yield **9**.

**9**: (*E*)-3-(*tert*-butyldimethylsilyl)-5-phenylpent-2-en-4-yn-1-yl 2,4-dinitrobenzoate; isolated by column chromatography (EtOAc/petroleum ether = 1:5); yellow solid; (328.1mg, 80% yield); <sup>1</sup>H NMR (600 MHz, CDCl<sub>3</sub>): δ 8.76–8.76 (m, 1H), 8.4 (dd, *J* = 8.4, 1.8 Hz, 1H), 7.94 (d, *J* = 8.4 Hz, 1H), 7.43–7.41 (m, 2H), 7.33–7.29 (m, 3H), 6.30 (t, *J* = 12 Hz, 1H), 5.31 (d, *J* = 6 Hz, 2H), 1.02 (s, 9H), 0.25 (s, 6H); <sup>13</sup>C NMR (150 MHz, CDCl<sub>3</sub>): δ 163.5, 148.8, 147.9, 141.5, 132.7, 131.14, 131.12, 127.4, 123.4, 119.5, 100.9, 87.6, 66.2, 26.5, 17.2, -6.6; HRMS (ESI) *m/z* calcd for

$[\text{C}_{24}\text{H}_{26}\text{N}_2\text{O}_6\text{Si} + \text{Na}]^+$  489.1458, found 489.1460.

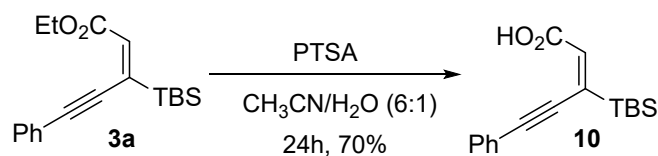

To a solution of ethyl (*E*)-3-(*tert*-butyldimethylsilyl)-5-phenylpent-2-en-4-ynoate **3a** (314.0 mg, 1.0 mmol) in CH<sub>3</sub>CN and H<sub>2</sub>O (6:1, 6 mL), heated reflux to 90 °C, then was added *p*-toluenesulfonic acid (34.4 mg, 2.0 mmol). After stirring for 24 h at 90 °C, the resulting mixture was concentrated and taken up by ethyl acetate. The aqueous phase was extracted with ethyl acetate and the organic fractions were combined. The filtrate was dried over Na<sub>2</sub>SO<sub>4</sub>, filtered and concentrated. The resulting residue was chromatographed over silica gel to yield **10**.

**10**: (*E*)-3-(*tert*-butyldimethylsilyl)-5-phenylpent-2-en-4-ynoic acid; isolated by column chromatography (EtOAc/petroleum ether = 1:10); white solid; (200.2 mg, 70% yield); <sup>1</sup>H NMR (600 MHz, CDCl<sub>3</sub>): δ 7.50–7.48 (m, 2H), 7.36–7.30 (m, 3H), 6.36 (s, 1H), 1.01 (s, 9H), 0.28 (s, 6H); <sup>13</sup>C NMR (150 MHz, CDCl<sub>3</sub>): δ 168.8, 144.0, 133.6, 131.8, 129.1, 128.4, 123.3, 110.1, 89.6, 26.6, 17.5, -6.4; HRMS (ESI) *m/z* calcd for  $[\text{C}_{17}\text{H}_{22}\text{O}_2\text{Si} + \text{Na}]^+$  309.1287, found 309.1282.

## 7. The crystal structure and data of 3j, 4l and 6

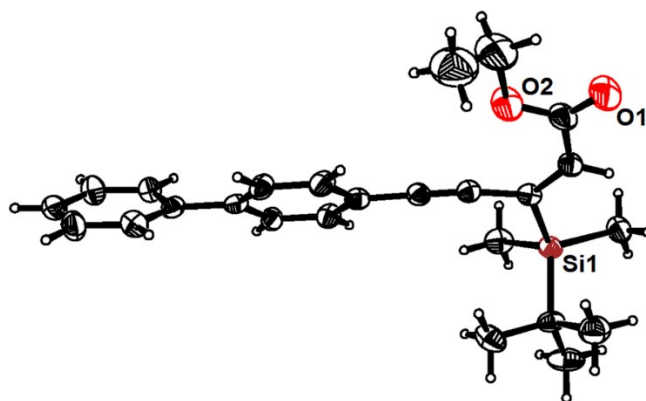

### Single crystal data of 3j:

|                        |                                                   |                                                   |
|------------------------|---------------------------------------------------|---------------------------------------------------|
| Bond precision:        | C-C = 0.0121 Å                                    | Wavelength = 0.71073                              |
| Cell:                  | a = 6.3035(2)                                     | b = 9.3843(8)    c = 19.8035(6)                   |
|                        | alpha = 89.16(2)                                  | beta = 83.61(2)    gamma = 88.49(2)               |
| Temperature:           | 296 K                                             |                                                   |
|                        | Calculated                                        | Reported                                          |
| Volume                 | 1163.69(12)                                       | 1163.68(11)                                       |
| Space group            | P -1                                              | P -1                                              |
| Hall group             | -P 1                                              |                                                   |
| Moiety formula         | C <sub>25</sub> H <sub>30</sub> O <sub>2</sub> Si |                                                   |
| Sum formula            | C <sub>25</sub> H <sub>30</sub> O <sub>2</sub> Si | C <sub>25</sub> H <sub>30</sub> O <sub>2</sub> Si |
| Mr                     | 390.58                                            | 390.58                                            |
| Dx, g cm <sup>-3</sup> | 1.115                                             | 1.115                                             |
| Z                      | 2                                                 | 2                                                 |
| Mu (mm <sup>-1</sup> ) | 0.117                                             | 0.117                                             |
| F000                   | 420.0                                             | 420.0                                             |
| F000'                  | 420.32                                            |                                                   |
| h, k, lmax             | 7,11,23                                           | 7,11,23                                           |
| Nref                   | 4116                                              | 4034                                              |
| Tmin, Tmax             | 0.967,0.976                                       | 0.967,0.976                                       |
| Tmin'                  | 0.967                                             |                                                   |



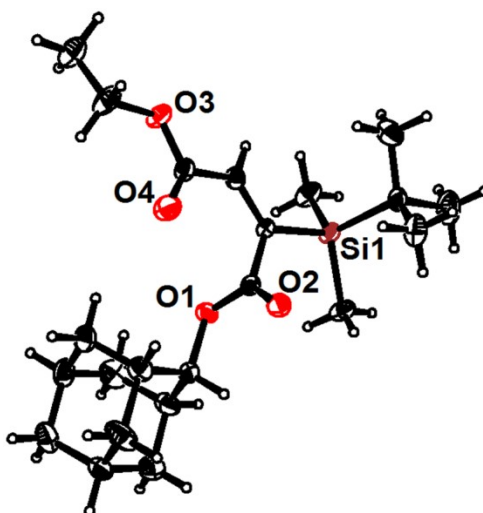

**Single crystal data of 4l:**

|                        |                                                   |                                                                  |
|------------------------|---------------------------------------------------|------------------------------------------------------------------|
| Bond precision:        | C-C = 0.0078 Å                                    | Wavelength = 0.71073                                             |
| Cell:                  | a = 15.450(11)<br>alpha = 90                      | b = 6.749(5)    c = 24.159(15)<br>beta = 112.04(4)    gamma = 90 |
| Temperature:           | 293 K                                             |                                                                  |
|                        | Calculated                                        | Reported                                                         |
| Volume                 | 2335(3)                                           | 2335(3)                                                          |
| Space group            | P 21/c                                            | P21/c                                                            |
| Hall group             | -P 2ybc                                           |                                                                  |
| Moiety formula         | C <sub>22</sub> H <sub>36</sub> O <sub>4</sub> Si |                                                                  |
| Sum formula            | C <sub>22</sub> H <sub>36</sub> O <sub>4</sub> Si | C <sub>22</sub> H <sub>36</sub> O <sub>4</sub> Si                |
| Mr                     | 392.60                                            | 392.60                                                           |
| Dx, g cm <sup>-3</sup> | 1.117                                             | 1.117                                                            |
| Z                      | 4                                                 | 4                                                                |
| Mu (mm <sup>-1</sup> ) | 0.117                                             | 0.117                                                            |
| F000                   | 0.123                                             | 0.123                                                            |
| F000'                  | 856.69                                            |                                                                  |
| h, k, lmax             | 18,8,28                                           | 18,8,28                                                          |
| Nref                   | 4102                                              | 4099                                                             |
| Tmin, Tmax             | 0.965,0.976                                       | 0.965,0.976                                                      |
| Tmin'                  | 0.965                                             |                                                                  |

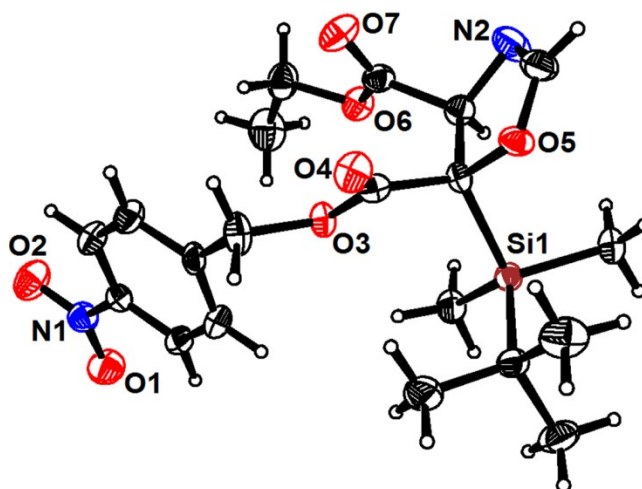

### Single crystal data of 6:

|                        |                                                                  |                                                                  |
|------------------------|------------------------------------------------------------------|------------------------------------------------------------------|
| Bond precision:        | C-C = 0.0060 Å                                                   | Wavelength = 0.71073                                             |
| Cell:                  | a = 9.0411(16)                                                   | b = 24.0685(12) c = 10.800(2)                                    |
|                        | alpha = 90                                                       | beta = 103.45(3) gamma = 90                                      |
| Temperature:           | 296 K                                                            |                                                                  |
|                        | Calculated                                                       | Reported                                                         |
| Volume                 | 2285.7(7)                                                        | 2285.8(7)                                                        |
| Space group            | P 21/n                                                           | P2(1)/n                                                          |
| Hall group             | -P 2yn                                                           |                                                                  |
| Moiety formula         | C <sub>20</sub> H <sub>28</sub> N <sub>2</sub> O <sub>7</sub> Si |                                                                  |
| Sum formula            | C <sub>20</sub> H <sub>28</sub> N <sub>2</sub> O <sub>7</sub> Si | C <sub>20</sub> H <sub>28</sub> N <sub>2</sub> O <sub>7</sub> Si |
| Mr                     | 436.53                                                           | 436.53                                                           |
| Dx, g cm <sup>-3</sup> | 1.269                                                            | 1.269                                                            |
| Z                      | 4                                                                | 4                                                                |
| Mu (mm <sup>-1</sup> ) | 0.144                                                            | 0.144                                                            |
| F000                   | 928.0                                                            | 928.0                                                            |
| F000'                  | 928.80                                                           |                                                                  |
| h, k, lmax             | 10,28,12                                                         | 10,28,12                                                         |
| Nref                   | 4033                                                             | 4026                                                             |
| Tmin, Tmax             | 0.959,0.970                                                      | 0.959,0.970                                                      |
| Tmin'                  | 0.959                                                            |                                                                  |

## 8. DFT Calculation results

As shown in **Figure S1**, simplified model (ester ethyl in substrate were simplified to methyl) were adopted to explore the reaction mechanism.

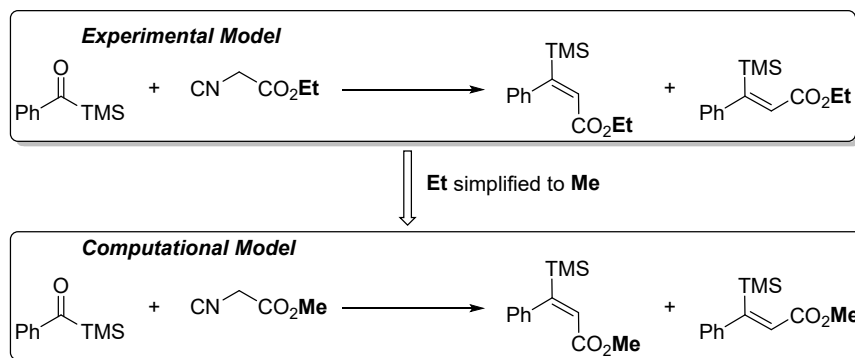

**Figure S1.** Experimental model versus simplified model used in reaction mechanism exploration.

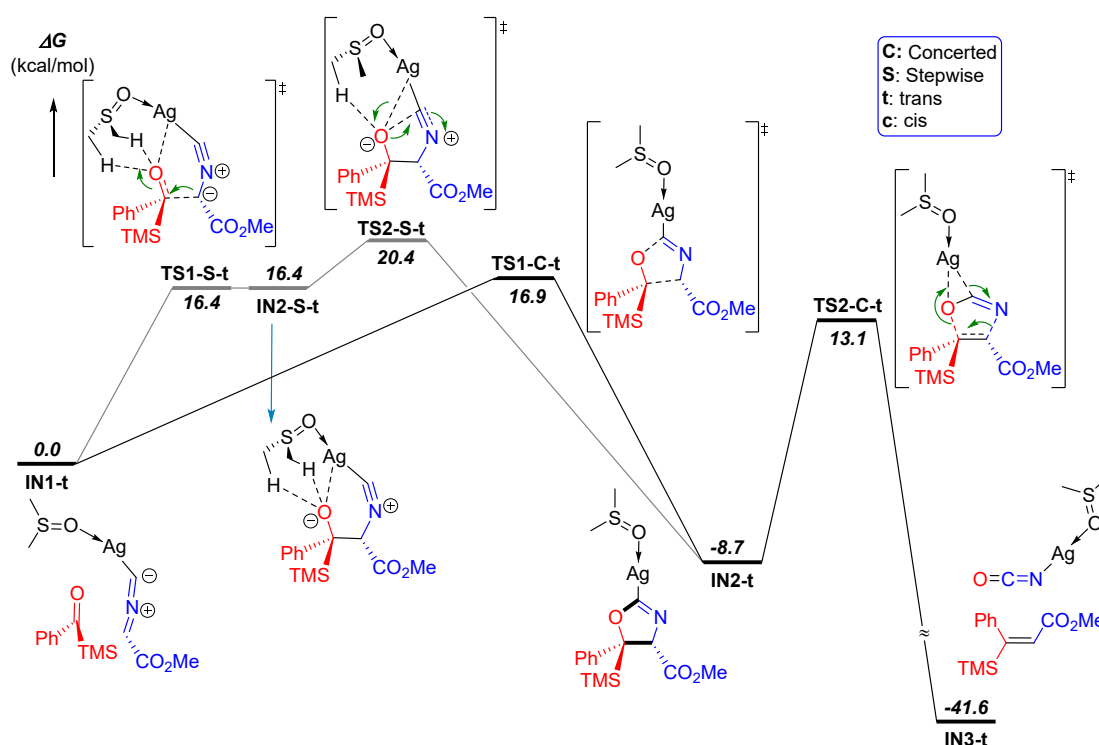

**Figure S2.** DFT calculation results on *trans*-alkene product pathway. Relative solvated Gibbs free energies are shown in *Italic bold*, unit: kcal/mol. Calculated at B3LYP-GD3/def2-TZVP//B3LYP-GD3/6-31G(d)/SDD level with SMD solvation model

(solvent = dimethylsulfoxide).

Two cyclization pathways (Concerted and Stepwise cyclization pathways) were found. *Trans*- and *cis*- pathways were shown in **Figure S2** and **Figure S3**. And the rate-determining-step is the ring-opening step (TS2-C-t, 13.1 kcal/mol; TS2-C-c, 14.2 kcal/mol), and chem-selectivity step is cyclization step (TS2-S-t, 20.4 kcal/mol; TS1-C-t, 16.9 kcal/mol; TS2-S-t, 20.4 kcal/mol; TS1-C-c, 19.1 kcal/mol).

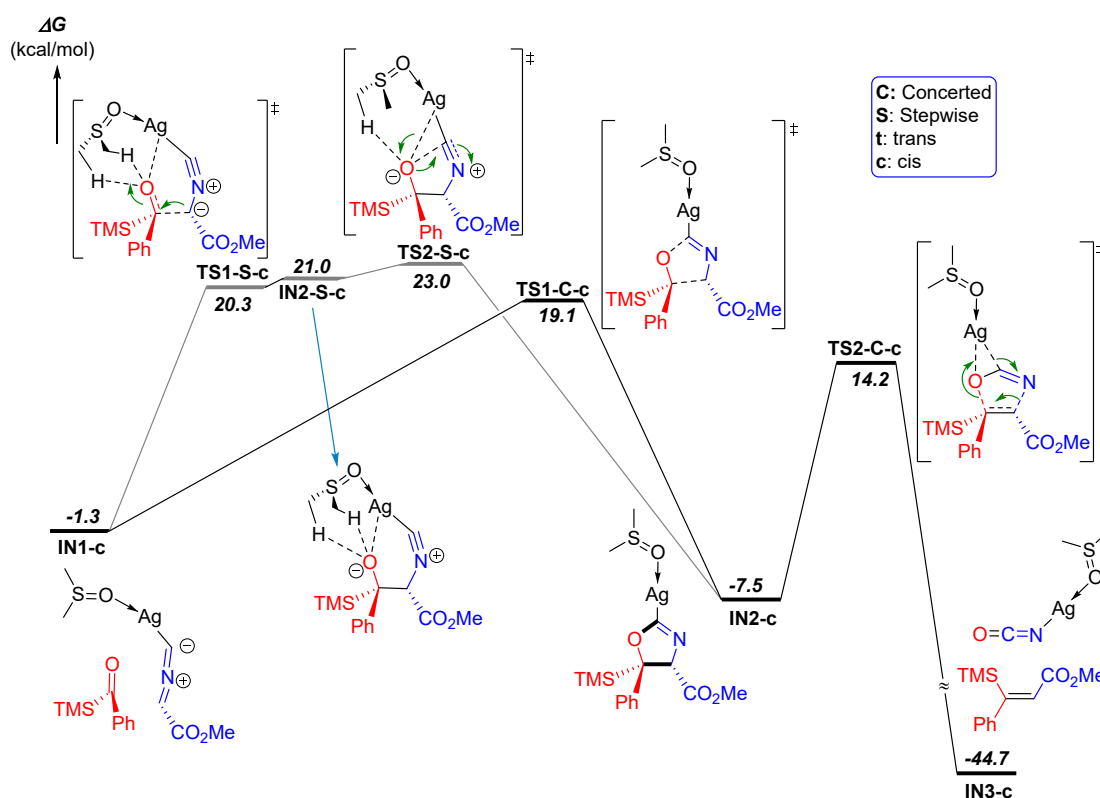

**Figure S3.** DFT calculation results on *cis*-alkene product pathway. Relative solvated Gibbs free energies are shown in **Italic bold**, unit: kcal/mol. Calculated at B3LYP-GD3/def2-TZVP//B3LYP-GD3/6-31G(d)/SDD level with SMD solvation model (solvent = dimethylsulfoxide).

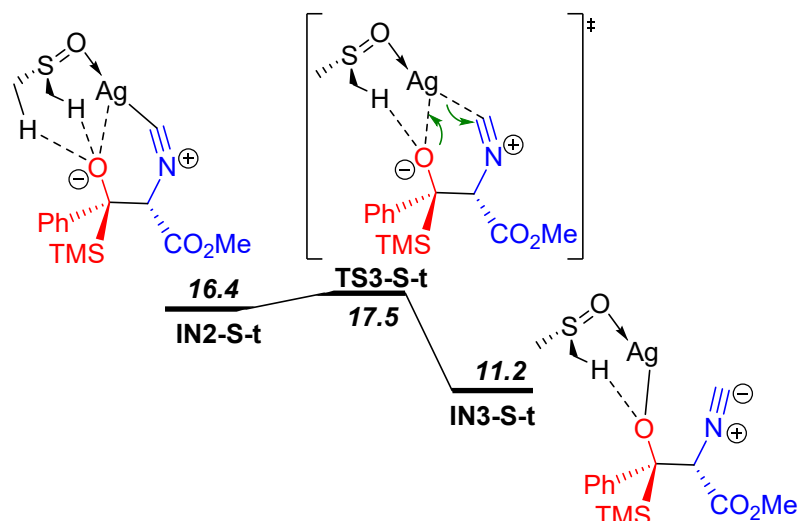

**Figure S4.** DFT calculation results on coordination of Ag between O and C. Relative solvated Gibbs free energies are shown in *Italic bold*, unit: kcal/mol. Calculated at B3LYP-GD3/def2-TZVP//B3LYP-GD3/6-31G(d)/SDD level with SMD solvation model (solvent = dimethylsulfoxide).

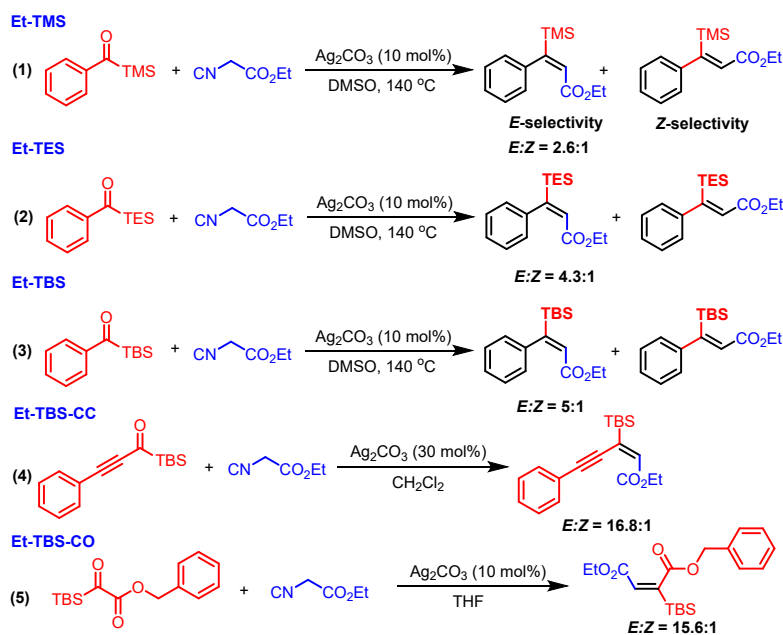

**Figure S5.** Experimental results on substituent effects on chem-selectivity.

As shown in **Table S6**, computational results on chemselectivity influenced by substituent effects agree well with experimental observation (**Figure S5**).

**Table S6.** Computational results of substituent effects on chem-selectivity. Calculated at B3LYP-GD3/def2-TZVP//B3LYP-GD3/6-31G(d)/SDD level with SMD solvation model (solvent = dimethylsulfoxide).

| Entry                       | $\Delta\Delta E$<br>(kcal/mol) | $\Delta\Delta G$<br>(kcal/mol) | <i>Experimental chem-selectivity (trans: cis or E:Z)</i> |
|-----------------------------|--------------------------------|--------------------------------|----------------------------------------------------------|
| TS1-C-c-Et-TMS <sup>a</sup> | 2.2                            | 4.2                            | 2.55                                                     |
| TS2-S-c-Et-TMS <sup>a</sup> | -2.8                           | 3.8                            |                                                          |
| TS1-C-t-Et-TMS <sup>b</sup> | 0.0                            | 0.0                            |                                                          |
| TS2-S-t-Et-TMS <sup>b</sup> | 0.0                            | 4.9                            |                                                          |
| /                           | /                              | /                              | /                                                        |
| TS1-C-c-Et-TES <sup>a</sup> | 0.9                            | 4.4                            | 4.29                                                     |
| TS2-S-c-Et-TES <sup>a</sup> | -1.1                           | 3.6                            |                                                          |
| TS1-C-t-Et-TES <sup>b</sup> | 0.0                            | 0.0                            |                                                          |
| TS2-S-t-Et-TES <sup>b</sup> | -0.9                           | 3.1                            |                                                          |
| /                           | /                              | /                              | /                                                        |
| TS1-C-c-Et-TBS <sup>a</sup> | 2.0                            | 4.8                            | major                                                    |
| TS2-S-c-Et-TBS <sup>a</sup> | 0.8                            | 5.9                            |                                                          |
| TS1-C-t-Et-TBS <sup>b</sup> | 0.0                            | 0.0                            |                                                          |
| TS2-S-t-Et-TBS <sup>b</sup> | 2.9                            | 7.3                            |                                                          |

Note: <sup>a</sup> leading to *Z* product; <sup>b</sup> leading to *E* product.

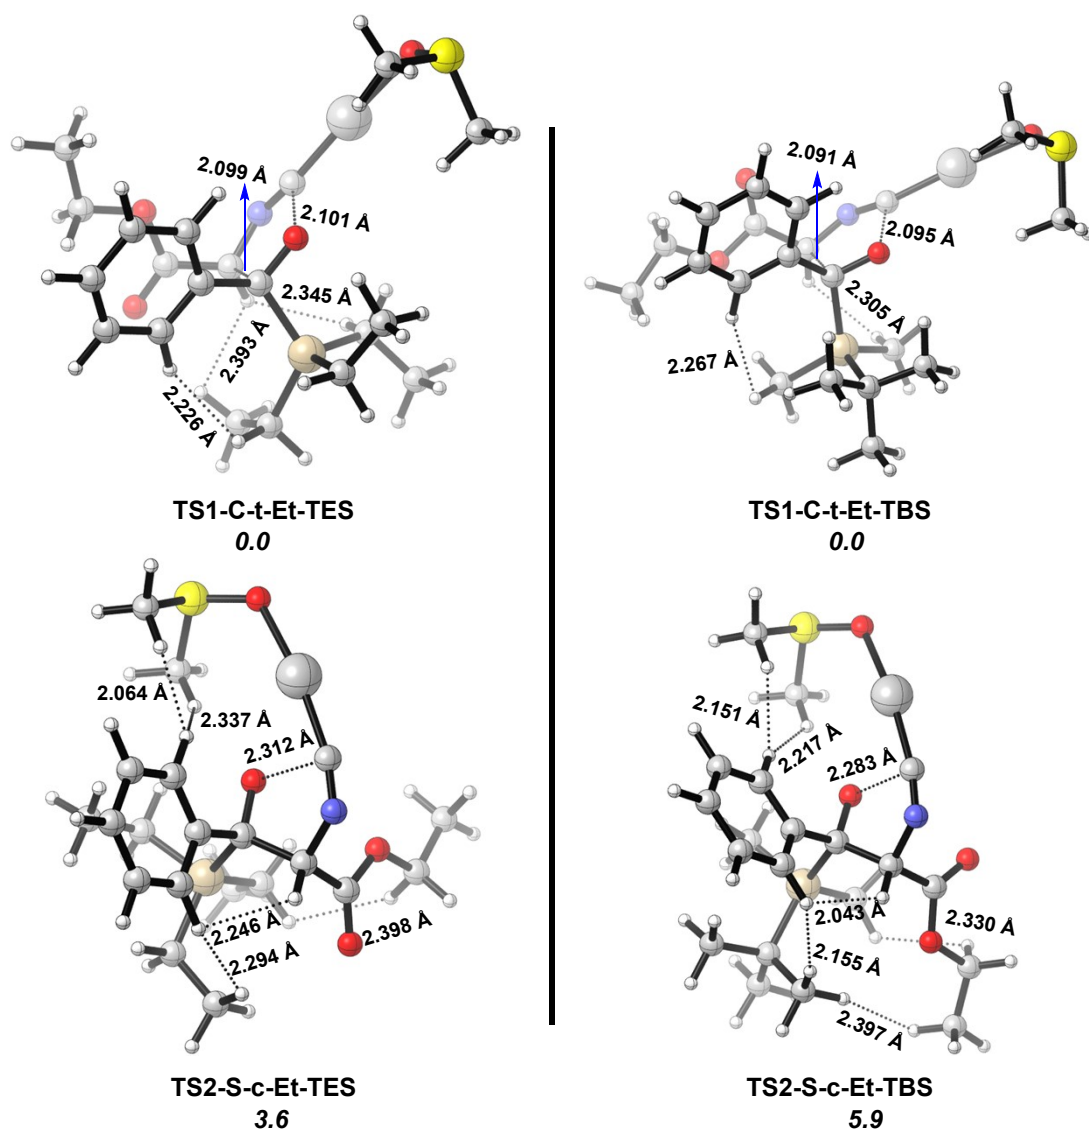

**Figure S6.** 3d representations of RDS transition states on concerted pathway and stepwise pathway for Et-TES (left) and Et-TBS substrate (right), respectively. Relative solvated Gibbs free energies are shown in *Italic bold*, unit: kcal/mol. Calculated at B3LYP-GD3/def2-TZVP//B3LYP-GD3/6-31G(d)/SDD level with SMD solvation model (solvent = dimethylsulfoxide).

As shown in **Figure S6**, the steric effects are less severe in **TS1-C-t-Et-TBS** than those in **TS1-C-t-Et-TES**, while such effects are more dramatic in **TS2-S-c-Et-TBS** than those in **TS2-S-c-Et-TES**, accounting for better *E:Z* ratio for Et-TBS than Et-TES substrate.

**Table S7.** Absolute electronic energies and Gibbs free energies for all the intermediates and transition states structures in this article, unit: Hartree. Calculated at B3LYP-

GD3/def2-TZVP//B3LYP-GD3/6-31G(d)/SDD level with SMD solvation model (solvent = dimethylsulfoxide).

| <b>Entry</b>          | <b>E<sup>a</sup></b> | <b>G<sup>a</sup></b> | <b>E<sup>b</sup></b> |
|-----------------------|----------------------|----------------------|----------------------|
| <b>IN1-t</b>          | -1814.5380954        | -1814.2313430        | -1815.0588563        |
| <b>TS1-S-t</b>        | -1814.5206832        | -1814.2097710        | -1815.0369159        |
| <b>IN2-S-t</b>        | -1814.5222025        | -1814.2110470        | -1815.0371571        |
| <b>TS3-S-t</b>        | -1814.5199602        | -1814.2096990        | -1815.0345384        |
| <b>IN3-S-t</b>        | -1814.5292322        | -1814.2191070        | -1815.0443407        |
| <b>TS2-S-t</b>        | -1814.5147041        | -1814.2027740        | -1815.0314632        |
| <b>TS1-C-t</b>        | -1814.5106214        | -1814.2045750        | -1815.0311761        |
| <b>IN2-t</b>          | -1814.5648571        | -1814.2515170        | -1815.0793526        |
| <b>TS2-C-t</b>        | -1814.5176181        | -1814.2108960        | -1815.0379135        |
| <b>IN3-t</b>          | -1814.6023218        | -1814.2933610        | -1815.1273665        |
| <b>IN1-c</b>          | -1814.5378236        | -1814.2316000        | -1815.0603476        |
| <b>TS1-C-c</b>        | -1814.5075220        | -1814.2013590        | -1815.0277769        |
| <b>IN2-c</b>          | -1814.5645147        | -1814.2508830        | -1815.0777641        |
| <b>TS2-C-c</b>        | -1814.5181972        | -1814.2109390        | -1815.0366601        |
| <b>IN3-c</b>          | -1814.6082414        | -1814.2998990        | -1815.1316462        |
| <b>TS1-S-c</b>        | -1814.5161816        | -1814.2040270        | -1815.0319050        |
| <b>IN2-S-c</b>        | -1814.5183714        | -1814.2038740        | -1815.0331767        |
| <b>TS2-S-c</b>        | -1814.5124741        | -1814.1995730        | -1815.0283539        |
| <b>TS1-C-c-Et-TMS</b> | -1853.8304004        | -1853.4959810        | -1854.3651276        |
| <b>TS2-S-c-Et-TMS</b> | -1853.8428962        | -1853.5012120        | -1854.3730132        |
| <b>TS1-C-t-Et-TMS</b> | -1853.8334491        | -1853.5022420        | -1854.3685729        |
| <b>TS2-S-t-Et-TMS</b> | -1853.8374623        | -1853.4983480        | -1854.3686427        |
| <b>TS1-C-c-Et-TBS</b> | -1971.7798061        | -1971.3587030        | -1972.3540552        |
| <b>TS2-S-c-Et-TBS</b> | -1971.7841515        | -1971.3594270        | -1972.3559519        |
| <b>TS1-C-t-Et-TBS</b> | -1971.7798953        | -1971.3633820        | -1972.3571835        |
| <b>TS2-S-t-Et-TBS</b> | -1971.7788964        | -1971.3554890        | -1972.3525154        |
| <b>TS1-C-c-Et-TES</b> | -1971.7739972        | -1971.3517760        | -1972.3481871        |
| <b>TS2-S-c-Et-TES</b> | -1971.7793809        | -1971.3552510        | -1972.3513812        |
| <b>TS1-C-t-Et-TES</b> | -1971.7738289        | -1971.3571620        | -1972.3496957        |



|                          |               |               |               |
|--------------------------|---------------|---------------|---------------|
| <b>TS2-S-t-Et-TES</b>    | -1971.7778142 | -1971.3547510 | -1972.3512047 |
| <b>TS1-C-c-Et-TBS-CC</b> | -2454.4012175 | -2454.0287410 | -2454.9736305 |
| <b>TS2-S-c-Et-TBS-CC</b> | -2454.4077876 | -2454.0376780 | -2454.9812472 |
| <b>TS1-C-t-Et-TBS-CC</b> | -2454.4092329 | -2454.0344510 | -2454.9789475 |
| <b>TS2-S-t-Et-TBS-CC</b> | -2454.4134290 | -2454.0353880 | -2454.9797149 |

Note: <sup>a</sup> Calculated at B3LYP-GD3/6-31G(d)/SDD level; <sup>b</sup> Obtained by single point calculation at B3LYP-GD3/def2-TZVP level.

### Computational details

All geometry optimizations were performed at B3LYP [6-9]-GD3 [10]/6-31G(d)(for C, H, N, O, S)/SDD (for Ag atoms) level with the Gaussian 16 [11] packages. SMD solvation model (solvent=dimethylsulfoxide) was utilized, in accordance with the experiments [12-15]. To save computational costs, “g09defaults” keyword was used in all calculations. Frequency calculations were performed with the optimized geometries to ensure only one imaginary frequency for transition state structures and zero imaginary frequencies for reactant or product intermediate structures. Single point calculations at B3LYP-GD3/def2-TZVP level were performed on the optimized structures obtained at B3LYP-GD3/6-31G(d)/SDD level to correct the Gibbs free energies.

**Total energies (Electronic energies, Gibbs free energies, Unit: Hartree), charge, multiplicity, and geometrical coordinates for structures involved in DFT calculations of this article, calculated at B3LYP-GD3/6-31G(d) level with SMD solvation model (solvent = dimethylsulfoxide).**

|                                                 |                                            |
|-------------------------------------------------|--------------------------------------------|
| <b>IN1-t</b>                                    | C,1.8307134545,0.2150044156,-2.8379441926  |
| Electronic_Energy=-1814.53809542                | Ag,3.5111028075,0.1679260227,-1.6526789473 |
| Sum of electronic and thermal Free Energies = - | C,-1.0051200819,2.0755166442,-2.5880596542 |
| 1814.231343                                     | O,-0.2787309752,3.041324493,-2.8202970956  |
| Charge=0                                        | O,-2.3497832781,2.215855668,-2.3331980032  |
| Multiplicity=1                                  | C,-2.8219412023,3.5661689903,-2.2984930194 |
| ---Coordinates start---                         | O,1.5936030556,0.2656294572,0.4476056917   |
| C,0.4416960064,0.7281740929,0.5423874509        | C,0.2480960585,2.2046612246,0.5462300151   |
| C,-0.6197719471,0.7000502523,-2.5367107528      | C,1.2923795281,3.0458320322,0.121376902    |
| N,0.6703392709,0.4004042654,-2.7024773664       |                                            |

C,-0.9481125292,2.7815987011,1.0043491674  
 C,1.1473049799,4.4293264569,0.1643400216  
 C,-1.0881156091,4.1687983975,1.0603293024  
 C,-0.0412728197,4.994934627,0.6399091866  
 Si,-0.9302673444,-0.6205652861,0.8236724277  
 C,-0.8514672238,-0.9974487854,2.6761869637  
 C,-0.3497156732,-2.1238866849,-0.1538232376  
 C,-2.6864059144,-0.1134895522,0.3383802469  
 O,5.3150809106,0.1229545387,-0.4630142498  
 S,5.4010709719,0.0388110715,1.0957673045  
 C,4.4117697343,1.4140088898,1.7458136626  
 C,4.3178653081,-1.3268294965,1.6022338453  
 H,-1.32641564,-0.108401983,-2.4147196649  
 H,-2.2962293361,4.1501704224,-1.5366832973  
 H,-2.697339008,4.056432902,-3.2702540987  
 H,-3.8839919693,3.5025321488,-2.0507030787  
 H,2.2120639277,2.6006176961,-0.2448739698  
 H,-1.7677689694,2.1534640251,1.3366093313  
 H,1.9576270458,5.0706882012,-0.172760909  
 H,-2.0117230636,4.6042488469,1.4316661778  
 H,-0.1524291828,6.0753760082,0.679143705  
 H,-1.5280164044,-1.8225534271,2.9353937222  
 H,0.1634553368,-1.2873896391,2.9759479384  
 H,-1.1435134718,-0.1248079139,3.2740473718  
 H,-1.0051990651,-2.9825239169,0.0415702748  
 H,-0.3511030541,-1.9372483243,-1.233698005  
 H,0.6694987936,-2.4005345549,0.1382582385  
 H,-2.6994585387,0.5959141579,-0.4954763851  
 H,-3.2545799879,-1.0028642816,0.0338304957  
 H,-3.2208151641,0.3411875223,1.1817327896  
 H,4.4342805911,1.3599307884,2.8394891618  
 H,4.8826471194,2.3419585527,1.4105639253  
 H,3.388176383,1.3313163409,1.3700480874  
 H,4.7452494138,-2.2489790849,1.1993986756  
 H,4.3107944765,-1.367599059,2.696708002  
 H,3.3088782796,-1.159183864,1.213311842  
 ---end---  
**TS1-S-t**  
 Electronic\_Energy=-1814.52068320  
 Sum of electronic and thermal Free Energies = -  
 1814.209771  
 Charge=0            Multiplicity=1  
 ---Coordinates start---  
 C,0.1457825473,0.7864642118,-0.1408172986  
 C,-0.6709322174,0.8633072548,-1.9232186111  
 N,0.0159159494,-0.1175801253,-2.6107901214  
 C,0.9390848378,-0.7581158715,-2.9680839518  
 Ag,2.6740593372,-0.8690408436,-1.7498092445  
 C,-0.3755649372,2.2169772259,-2.4721669343  
 O,0.6826375285,2.5577615433,-2.9726226345  
 O,-1.4181353358,3.0461812108,-2.2717226957  
 C,-1.1497553765,4.446664361,-2.4655947859  
 O,1.4383777627,0.5975263583,-0.2406661325  
 C,-0.259095996,2.15035581,0.4124418723  
 C,0.7364322549,3.0765667286,0.755388421  
 C,-1.600662086,2.5040014001,0.6355898573  
 C,0.4041870121,4.3222233138,1.2949252977  
 C,-1.9357427972,3.7429699042,1.1812039472  
 C,-0.933640809,4.6613693106,1.5128004893  
 Si,-0.6857499813,-0.7450550854,0.7332813625  
 C,-0.38292767,-0.4813927515,2.5837536386  
 C,0.1861032433,-2.3331004441,0.1950418811  
 C,-2.5408854472,-0.9860504507,0.4293638668  
 O,4.5928817582,-1.0822158076,-0.6569813517  
 S,4.9153568956,-0.3160470618,0.6651366777  
 C,4.5600232155,1.4357297783,0.3405045531  
 C,3.5357851374,-0.634999182,1.8037165409  
 H,-1.7275702818,0.6524371273,-1.7908308233  
 H,-0.3240807583,4.7686988057,-1.8247879864  
 H,-0.9041789688,4.6543234743,-3.5112241951  
 H,-2.0679745985,4.9634021293,-2.1835229659  
 H,1.7745778208,2.8054108487,0.5987820878  
 H,-2.393898865,1.8196803484,0.3529728915  
 H,1.1928944816,5.0255874233,1.5523074851  
 H,-2.9812933839,3.9956000188,1.3400684984  
 H,-1.1939992139,5.6277222328,1.9371082451  
 H,-0.7112252303,-1.354813426,3.1626419373  
 H,0.6837778139,-0.3256048757,2.78921714  
 H,-0.9269524329,0.3941163693,2.9589273327  
 H,-0.2128907989,-3.1802773905,0.7700251503  
 H,0.0309565571,-2.5492242811,-0.8680372257  
 H,1.2651574159,-2.2811150976,0.3798448031  
 H,-2.771515159,-1.1014105274,-0.637005507  
 H,-2.8687091771,-1.9061965215,0.9329193113  
 H,-3.1511539171,-0.1650693562,0.8218266542  
 H,4.6850331041,1.9916414532,1.2758393703  
 H,5.2833411349,1.7874250558,-0.4002203053  
 H,3.5337792748,1.5213563663,-0.0321904562  
 H,3.524839847,-1.7075379904,2.01506413  
 H,3.7239187073,-0.0768995575,2.7271785349

H,2.6080378017,-0.3072414172,1.3228592495  
---end---  
**IN2-S-t**  
Electronic\_Energy=-1814.52220245  
Sum of electronic and thermal Free Energies = -  
1814.211047  
Charge=0            Multiplicity=1  
---Coordinates start---  
C,0.0413293874,0.9427199528,-0.3738395697  
C,-0.6701624448,0.9047970903,-1.8603559499  
N,-0.1122232431,-0.1737924966,-2.6043657281  
C,0.8719582812,-0.7533767717,-2.9103860033  
Ag,2.6647449091,-0.459192626,-1.7595961895  
C,-0.357964312,2.1994814001,-2.608961374  
O,0.687761721,2.4396945939,-3.1767884098  
O,-1.3778373399,3.0613534548,-2.4937302158  
C,-1.1068354305,4.4187832704,-2.8986558189  
O,1.4007875364,0.8622458586,-0.4249363445  
C,-0.4232510145,2.2699525249,0.2584478456  
C,0.5388353267,3.1929218169,0.6912499794  
C,-1.7800541436,2.5905543591,0.4459581633  
C,0.1627112051,4.4001494575,1.2885026582  
C,-2.1577165534,3.7920066904,1.0456733204  
C,-1.1873038443,4.7055943109,1.4716174189  
Si,-0.5204685157,-0.5427886889,0.7575232184  
C,0.2571233518,-0.1839623973,2.4449430077  
C,0.1108725371,-2.2002102875,0.0934394921  
C,-2.3965929725,-0.7369001869,0.9713026709  
O,4.7170628614,-0.5480583743,-0.838034954  
S,4.9512653964,-0.3307157549,0.6881203255  
C,4.0815585071,1.1976272587,1.1475632925  
C,3.8571757022,-1.4985346444,1.5477845536  
H,-1.7466080835,0.7802205138,-1.7516722768  
H,-0.2834959679,4.8294990046,-2.306971676  
H,-0.8563636734,4.4638977156,-3.9620031245  
H,-2.0260465037,4.9706050997,-2.6999815727  
H,1.5850814165,2.947810384,0.5491052367  
H,-2.5540048498,1.911015983,0.1034694974  
H,0.9287070883,5.1000819265,1.6150160504  
H,-3.2134838903,4.0181051091,1.1751143774  
H,-1.4823515163,5.6411935932,1.9399588893  
H,0.2186153027,-1.0666169425,3.096605427  
H,1.3056317578,0.1128327243,2.334257705  
H,-0.2696385911,0.6316048397,2.9560500149  
H,-0.0545100167,-2.9764726882,0.8535322681

H,-0.429220052,-2.5018084259,-0.8118629832  
H,1.1803400635,-2.1891956588,-0.1429056195  
H,-2.9177692193,-0.7936472422,0.0067605309  
H,-2.6090543836,-1.6702415784,1.5112670487  
H,-2.8385171651,0.0839178658,1.5468567596  
H,4.1300974248,1.3009068032,2.2368680254  
H,4.6136558365,2.0285737946,0.6754273513  
H,3.0437619705,1.1446910089,0.7918730109  
H,4.1877024102,-2.5091673398,1.2933273511  
H,3.9523435779,-1.3349385614,2.6261478077  
H,2.8267541554,-1.3367017396,1.2217215119  
---end---  
**TS3-S-t**  
Electronic\_Energy=-1814.51996015  
Sum of electronic and thermal Free Energies = -  
1814.209699  
Charge=0            Multiplicity=1  
---Coordinates start---  
C,-0.0786577254,1.0265155994,-0.3073587249  
C,-0.7050450511,0.9368565704,-1.8000030425  
N,-0.243149727,-0.2412888207,-2.4481662014  
C,0.480071311,-1.0421053061,-2.9146080561  
Ag,2.5665836509,-0.0690877459,-1.7111263214  
C,-0.2103205595,2.1286874114,-2.6223438679  
O,0.8372824983,2.1554331148,-3.2384886675  
O,-1.0582710086,3.1561176896,-2.5171650043  
C,-0.6066252246,4.4106012915,-3.0724893634  
O,1.2915074734,1.0363100031,-0.3281355165  
C,-0.6418783534,2.3118186348,0.3264204433  
C,0.2519437351,3.2376262502,0.8815960289  
C,-2.0189250887,2.5813155356,0.4195550309  
C,-0.2098900029,4.4005781585,1.5055020051  
C,-2.4824845241,3.7396466496,1.0438146394  
C,-1.5796262543,4.657933148,1.5912572574  
Si,-0.5605490488,-0.477669074,0.8419422541  
C,0.2634156341,-0.0886262352,2.4986085719  
C,0.1214911508,-2.1244042276,0.2018229888  
C,-2.4256792554,-0.7145813105,1.096300889  
O,4.7250451422,-0.491203988,-1.1032477751  
S,5.0777269084,-0.3917281895,0.4116373585  
C,4.2792021209,1.1096869433,1.0610778809  
C,4.031301836,-1.6031813173,1.2724717658  
H,-1.7931843002,0.9248624903,-1.7536093045  
H,0.2968247679,4.7460771399,-2.5553674413  
H,-0.4059675712,4.3089851977,-4.1422716918

H,-1.4227446651,5.1131543517,-2.9021771091  
H,1.3128280186,3.0237926268,0.8145464481  
H,-2.7419354763,1.891360661,-0.0054116837  
H,0.5039192488,5.104404241,1.9279244222  
H,-3.5521078817,3.9279567831,1.0987643263  
H,-1.9420211326,5.5596274382,2.0784403272  
H,0.0880408849,-0.8954546101,3.2223236563  
H,1.3458542064,0.0223234695,2.3667409386  
H,-0.1188071887,0.8425177397,2.9341896216  
H,0.130473797,-2.8498260261,1.0273552512  
H,-0.5007529471,-2.5393443524,-0.5991733837  
H,1.1448525993,-2.0375795014,-0.1774216185  
H,-2.9581441783,-0.8105446081,0.140883388  
H,-2.6071891206,-1.6371507391,1.6650827724  
H,-2.8794588591,0.1126658094,1.6531961785  
H,4.4540971477,1.1404278764,2.142066322  
H,4.763654446,1.9676156741,0.5860974928  
H,3.2049374264,1.098281754,0.8342135905  
H,4.3232746178,-2.5981735711,0.9257657108  
H,4.2134091771,-1.5152163589,2.3485063049  
H,2.9800783458,-1.4095002708,1.0408988982  
---end---

### IN3-S-t

Electronic\_Energy=-1814.52923220

Sum of electronic and thermal Free Energies = -  
1814.219107

Charge=0            Multiplicity=1

---Coordinates start---

C,0.2251390005,0.6527205438,0.6481698971  
C,1.731067995,0.5527125306,1.1973287761  
N,2.6403963583,1.0715168916,0.2265934224  
C,3.3216961429,1.5078690744,-0.620632159  
Ag,0.5623993101,3.3110399812,-0.7559729848  
C,2.3016506215,-0.7792646117,1.7058482174  
O,3.0467831601,-1.5163108274,1.0938441316  
O,1.8911563509,-0.9994468154,2.9601209474  
C,2.3399822189,-2.2315575148,3.5698875131  
O,-0.1416955321,1.9945587045,0.7123389774  
C,0.0658096748,0.0471963561,-0.7523185416  
C,-0.8952527612,0.6058004956,-1.6165825695  
C,0.7998013492,-1.0550434515,-1.2236614649  
C,-1.0969885425,0.1037643239,-2.9048660444  
C,0.6033225683,-1.5549342339,-2.5139417126  
C,-0.3416315054,-0.9767281194,-3.365456853  
Si,-1.095759876,-0.1776989253,1.8247352297

C,-2.793012191,0.3135715097,1.1560396161  
C,-0.9201110587,0.5160748091,3.57272344  
C,-1.011822896,-2.0701796963,1.8039176785  
O,1.1910927883,4.6498482989,-2.3418464012  
S,1.1413246038,4.2496590576,-3.8513394031  
C,1.899304484,2.6049654952,-3.9921700816  
C,-0.5721424052,3.7628738421,-4.1988210563  
H,1.733880531,1.2387812975,2.0468098427  
H,2.0648344786,-3.0899326616,2.952493877  
H,3.4246034841,-2.2079303076,3.7045713736  
H,1.8359290514,-2.2760671672,4.5350486944  
H,-1.4965522899,1.4360306283,-1.2650963607  
H,1.549056357,-1.5241655377,-0.5990818598  
H,-1.8450489013,0.5620596356,-3.5471607001  
H,1.1986771351,-2.3991093931,-2.8535162638  
H,-0.4896676579,-1.3659070249,-4.3694229033  
H,-3.5758168293,-0.0344872965,1.8436223768  
H,-2.8762411899,1.4018754176,1.0663929679  
H,-2.9948443005,-0.1269657369,0.1730830685  
H,-1.7451268936,0.1658100469,4.2073816116  
H,0.0209843761,0.2162472757,4.0436443001  
H,-0.9587179122,1.6115932691,3.5488124093  
H,-0.0945036443,-2.4694386707,2.2464583175  
H,-1.8581663205,-2.4878682114,2.366305994  
H,-1.0818897452,-2.4486431731,0.7763791102  
H,1.8302768503,2.2909146973,-5.0390493778  
H,2.9479750995,2.697754766,-3.6992272623  
H,1.376680455,1.8969824715,-3.3415157206  
H,-1.1970656119,4.6533111397,-4.0914897951  
H,-0.6236617715,3.3914373501,-5.2275703593  
H,-0.8791046085,2.9867094666,-3.4908119156  
---end---

### TS2-S-t

Electronic\_Energy=-1814.51470408

Sum of electronic and thermal Free Energies = -  
1814.202774

Charge=0            Multiplicity=1

---Coordinates start---

C,0.1001799612,1.0259875504,-0.4421769951  
C,-0.5827837006,0.9416660754,-1.9326524868  
N,0.2456311118,0.0336148516,-2.6853128501  
C,1.3898463436,-0.2646517457,-2.5130896946  
Ag,3.2283529039,-0.6731642851,-1.7231510805  
C,-0.5527049045,2.2990477215,-2.6296414232  
O,0.4354358202,2.8205477013,-3.103520885

O,-1.7671452282,2.8726198204,-2.5911154263  
C,-1.8165976787,4.2622180784,-2.9721547075  
O,1.4545519095,0.8974073453,-0.5448642933  
C,-0.3214198332,2.3540114236,0.2041336506  
C,0.6638632562,3.2107853926,0.7159787745  
C,-1.6693034757,2.7292468633,0.3567435413  
C,0.3197399066,4.4087421885,1.3490310389  
C,-2.0154969853,3.924680686,0.9879772828  
C,-1.0215530827,4.7727731527,1.4889917114  
Si,-0.4791175865,-0.4478516322,0.6900703143  
C,0.3524272346,-0.167619703,2.3661280096  
C,0.0783650925,-2.1044922049,-0.0384651279  
C,-2.3563189624,-0.5656957867,0.9503165307  
O,5.0268625981,-0.8587540876,-0.5342945397  
S,5.018744261,-0.5607041316,1.0051763096  
C,4.095478463,0.9863708887,1.2331511545  
C,3.8104138736,-1.7022945824,1.7326634721  
H,-1.6103264728,0.5790177041,-1.8929845107  
H,-1.1593413027,4.8542469683,-2.3288689123  
H,-1.5184309101,4.3878659191,-4.01674319  
H,-2.8544398361,4.5670499122,-2.8341524417  
H,1.7025477043,2.9191572396,0.6039630057  
H,-2.4547170221,2.0942782362,-0.0393373548  
H,1.1026849916,5.0572592395,1.7361996051  
H,-3.0641304813,4.1957274506,1.0857342695  
H,-1.2916029912,5.7023816888,1.9837210536  
H,0.2904977963,-1.0646485873,2.9961144596  
H,1.4095753721,0.0854002107,2.2376834028  
H,-0.12582954,0.6563825372,2.9106027404  
H,-0.1389103938,-2.9128083676,0.6733631765  
H,-0.4503106726,-2.3341634948,-0.9719581071  
H,1.1528022605,-2.1225653535,-0.2500470433  
H,-2.9030113298,-0.6039394008,-0.0010713233  
H,-2.5986713241,-1.4845062715,1.5024016259  
H,-2.7460680952,0.2793909636,1.5290922599  
H,4.0010403076,1.165138945,2.3096518113  
H,4.6926731826,1.7836688483,0.7811652294  
H,3.1098407184,0.916009926,0.7501146221  
H,4.2064623765,-2.7151371221,1.6201389649  
H,3.7000511594,-1.4603360253,2.7944275359  
H,2.8545682046,-1.6028437473,1.2113048403  
---end---

**TS1-C-t**

Electronic\_Energy=-1814.51062137

Sum of electronic and thermal Free Energies = -

1814.204575

Charge=0 Multiplicity=1

---Coordinates start---

C,-0.151162481,0.8941913106,0.131869003  
C,-0.476918469,0.8281161139,-1.925560331  
N,0.8112011065,0.4339215536,-2.2609758399  
C,1.8221250904,0.1394875028,-1.694489633  
Ag,3.7335343487,-0.4068102848,-1.2849259049  
C,-0.8622765938,2.1594285277,-2.4282018414  
O,-0.1058383248,3.0359445427,-2.8126701518  
O,-2.2060957623,2.3207136379,-2.3361059696  
C,-2.6929578774,3.6403956581,-2.630801692  
O,1.0421982333,0.3811931277,0.2599849396  
C,-0.2576479287,2.379505305,0.417492407  
C,0.9161522842,3.1435386471,0.5169611461  
C,-1.4887596324,3.0293938055,0.6033433314  
C,0.8650111323,4.5117438544,0.7843329118  
C,-1.543982127,4.3985735557,0.8761920812  
C,-0.3673958016,5.14825794,0.9666027267  
Si,-1.4818425309,-0.3693185813,0.6958609683  
C,-1.4444991662,-0.436294387,2.5888852912  
C,-0.9328338331,-2.0364177455,-0.0041216704  
C,-3.2606391354,-0.0165061394,0.1346733266  
O,5.7366891594,-0.9828032296,-0.7661397446  
S,6.3391447512,-0.8698990354,0.6738550624  
C,6.0274707956,0.8308920524,1.2206866346  
C,5.1753466846,-1.7157479449,1.7777825572  
H,-1.2182607679,0.0556917224,-2.1185484104  
H,-2.2136790897,4.3823463131,-1.9865976665  
H,-2.5104385494,3.8959285525,-3.6792861006  
H,-3.7658429499,3.6086478724,-2.4340631269  
H,1.8684725085,2.6389031615,0.3846342602  
H,-2.4146583906,2.4718507406,0.5166242042  
H,1.7875327526,5.0842117485,0.8532589767  
H,-2.5090741739,4.8792828151,1.0181887026  
H,-0.4102636968,6.2134484636,1.1794582683  
H,-2.142032671,-1.189782681,2.978495174  
H,-0.440564597,-0.6877026141,2.9537911318  
H,-1.7246653886,0.531849635,3.0243089483  
H,-1.5558589638,-2.8506975574,0.3885504865  
H,-1.00128829,-2.0653498244,-1.0990245871  
H,0.1088368836,-2.2346749299,0.271071  
H,-3.3016138306,0.4094740551,-0.8740353384  
H,-3.8423602867,-0.9485035023,0.1316072921  
H,-3.7693423044,0.6809315655,0.8117477931

H,6.3457107005,0.9231283174,2.2641536511  
H,6.6223814576,1.4950686408,0.5881101178  
H,4.9598279728,1.0545853288,1.1172831869  
H,5.1833517877,-2.7766033637,1.5138738308  
H,5.5181619383,-1.5844696034,2.8093056632  
H,4.1740490262,-1.2925456431,1.6430049336  
---end---  
**IN2-t**  
Electronic\_Energy=-1814.56485707  
Sum of electronic and thermal Free Energies = -  
1814.251517  
Charge=0            Multiplicity=1  
---Coordinates start---  
C,-0.489427665,0.9966251675,-0.0941368503  
C,-0.5182883096,0.9001690072,-1.6630197524  
N,0.7084166172,0.1547613048,-2.0106997259  
C,1.4332109498,0.0360294588,-0.9509092377  
Ag,3.3120478698,-0.8072023119,-0.8053528539  
C,-0.4777410098,2.2684268792,-2.3407258846  
O,0.4920549271,2.9970448925,-2.3792745071  
O,-1.672611812,2.581929405,-2.8776609296  
C,-1.782360551,3.9133197423,-3.420949732  
O,0.8842951524,0.5410811541,0.2036607605  
C,-0.7153842676,2.363278397,0.5125910931  
C,0.1975943988,2.9204987383,1.420843693  
C,-1.8901471512,3.081809939,0.2218825642  
C,-0.0465870315,4.1652869492,2.006704103  
C,-2.130464748,4.3268025951,0.8054627597  
C,-1.2095673002,4.8762440268,1.7020039309  
Si,-1.6204198622,-0.3375301726,0.7448386744  
C,-1.3094135719,-0.2515187655,2.6019238399  
C,-1.1170712651,-2.0189131636,0.0515394994  
C,-3.432410201,0.0076885289,0.3452192099  
O,5.2677840356,-1.7243727773,-0.7258263105  
S,6.4161277401,-1.3110816133,0.2485325469  
C,6.6195485077,0.4821545158,0.063909667  
C,5.6999812095,-1.3182819226,1.915659772  
H,-1.403237009,0.3689264472,-2.0241092525  
H,-1.6018624752,4.6566111367,-2.6387982332  
H,-1.0673642224,4.058588987,-4.235430585  
H,-2.804028154,3.995991776,-3.7938179645  
H,1.1035740553,2.3769073784,1.6638079834  
H,-2.6140563411,2.6746234517,-0.4760261973  
H,0.6778183771,4.5788446002,2.7041396934  
H,-3.0413127178,4.8660982537,0.5578972499

H,-1.3977020251,5.8446520624,2.1579587477  
H,-1.8751726845,-1.0293335159,3.1308765302  
H,-0.2460536961,-0.396867428,2.8283111063  
H,-1.6113946984,0.720201804,3.0107398301  
H,-1.7289689459,-2.8150069553,0.4955402378  
H,-1.2488555514,-2.0633083664,-1.0363338845  
H,-0.0657812941,-2.23716698,0.2732584649  
H,-3.5987630722,0.0986087677,-0.7356206608  
H,-4.0579958221,-0.8193405237,0.7066310415  
H,-3.788806214,0.927730128,0.8219401117  
H,7.3567167251,0.8267216662,0.7964650487  
H,6.9846465263,0.6683716725,-0.9496070221  
H,5.653405655,0.9737348032,0.2202557141  
H,5.4413150961,-2.3524155647,2.1586278618  
H,6.4524234023,-0.9461554019,2.6185929631  
H,4.8066942644,-0.684750434,1.9289253654  
---end---  
**TS2-C-t**  
Electronic\_Energy=-1814.51761805  
Sum of electronic and thermal Free Energies = -  
1814.210896  
Charge=0            Multiplicity=1  
---Coordinates start---  
C,-0.9371804476,1.149237077,0.0176607494  
C,-0.7257539734,1.0774958943,-1.3872495933  
N,0.987875586,0.2606951863,-1.674010148  
C,1.3886357609,0.1082447773,-0.4926733084  
Ag,3.3426862433,-0.7185211364,-0.7890859909  
C,-0.4741170525,2.3076618459,-2.1936616271  
O,0.2037937866,3.2634062841,-1.8657739814  
O,-1.0919195552,2.2161627081,-3.3938256715  
C,-0.8880519599,3.3310189558,-4.2806072252  
O,0.9436986479,0.3246206747,0.6590620067  
C,-0.9851431548,2.4517518269,0.7481375735  
C,-0.1873412882,2.7448364847,1.8665937197  
C,-1.9771826615,3.3829923279,0.3797365429  
C,-0.3581165146,3.9371368879,2.5744663688  
C,-2.1521132062,4.569282044,1.0925384562  
C,-1.3401017225,4.8550834349,2.1938234116  
Si,-1.9065190899,-0.2739871895,0.8339689795  
C,-1.5455429925,-0.3310473211,2.6824835433  
C,-1.4502824897,-1.9093931437,0.0102398916  
C,-3.7430046253,0.0963832053,0.5619671752  
O,5.3363703426,-1.578769262,-1.0012110602  
S,6.5742987211,-1.1419135516,-0.1555043326

C,6.6917212327,0.6605435559,-0.3194694578  
C,6.053242387,-1.207965123,1.580530633  
H,-1.2736128027,0.3147930519,-1.9319837085  
H,-1.2626076706,4.2562868828,-3.8324329012  
H,0.1739172716,3.4502527746,-4.5167208363  
H,-1.4509349229,3.0960102751,-5.1853875365  
H,0.5772002048,2.0381851188,2.1653909231  
H,-2.6172652581,3.1679542979,-0.472032006  
H,0.2804150288,4.1463275152,3.4293938442  
H,-2.9239595125,5.2705512443,0.7851091469  
H,-1.4731828124,5.7798928635,2.7490573079  
H,-2.1280048802,-1.1298235016,3.1603298154  
H,-0.483462421,-0.5257307994,2.8678463415  
H,-1.8081792743,0.6129740381,3.1741004075  
H,-2.0570748383,-2.7256882817,0.4238286306  
H,-1.6216597232,-1.8866622289,-1.0727474848  
H,-0.3947957078,-2.1504382095,0.1814315495  
H,-3.9926440531,0.1204449738,-0.5064559086  
H,-4.3725198689,-0.6682797585,1.0363206084  
H,-4.0169305871,1.0684532627,0.991123933  
H,7.4883841375,1.0196711099,0.3402393663  
H,6.9411043818,0.8809320322,-1.3608294776  
H,5.7292739522,1.1103434573,-0.051273343  
H,5.864255851,-2.255759808,1.8282740884  
H,6.8645876514,-0.8166768098,2.2028170585  
H,5.1421528798,-0.6124529448,1.7069055262  
---end---

### IN3-t

Electronic\_Energy=-1814.60232175  
Sum of electronic and thermal Free Energies = -  
1814.293361  
Charge=0            Multiplicity=1

---Coordinates start---

C,-0.827071924,1.0312011718,0.2096717842  
C,0.1146694833,0.8871332301,-0.7460408725  
N,1.2596163549,-1.4845972545,1.9064798414  
C,0.7108978132,-1.2174894899,2.9401175013  
Ag,2.9874878743,-1.0785022319,0.8403659714  
C,1.1940518902,1.8658999217,-1.0322267034  
O,1.7653212504,2.5868359541,-0.2314416847  
O,1.4780013404,1.8603877623,-2.3561998597  
C,2.4056429368,2.8667030362,-2.810922411  
O,0.1078205079,-0.9852590287,3.9563186566  
C,-0.9242658591,2.245883489,1.0654620263  
C,-0.7805624141,2.1660435488,2.4612864972

C,-1.2278250494,3.4911202703,0.4881036321  
C,-0.9054589774,3.3106732088,3.2518599724  
C,-1.3676582111,4.6300845453,1.282207711  
C,-1.2019940235,4.5454553462,2.667731605  
Si,-2.2552264683,-0.2381312802,0.3096678448  
C,-2.8355702578,-0.469087772,2.0883650269  
C,-1.6919660217,-1.8836910122,-0.4188621938  
C,-3.667531913,0.5027202391,-0.7062967895  
O,4.9501509693,-1.0403200335,-0.0346380302  
S,5.5229683877,-0.0084560217,-1.0575730266  
C,4.3708244817,-0.0023888019,-2.4568784708  
C,5.1575137476,1.6325503353,-0.3815364854  
H,0.0929488312,0.0354373009,-1.4218921942  
H,1.9840155939,3.8642613047,-2.6531256304  
H,3.3609846482,2.7928321197,-2.2890586434  
H,2.5411628107,2.6795537931,-3.8767316291  
H,-0.5591416454,1.211621071,2.9293027503  
H,-1.3511743364,3.5585434311,-0.5897499663  
H,-0.7764277036,3.2342075715,4.3286406045  
H,-1.6034901294,5.5842301165,0.817593373  
H,-1.307397772,5.4325196417,3.2867522543  
H,-3.6717081182,-1.1812202598,2.1043255271  
H,-2.0487582026,-0.8572423113,2.7438240546  
H,-3.1946076137,0.4740001341,2.5166279027  
H,-2.4963924832,-2.6264172856,-0.3374067266  
H,-1.425346138,-1.8004151187,-1.4794260971  
H,-0.8201995617,-2.2669209231,0.1253818392  
H,-3.3802076304,0.6261451071,-1.7579980369  
H,-4.5544709173,-0.1435554831,-0.6714702226  
H,-3.9562176935,1.4883216878,-0.3194611779  
H,4.6652911408,0.7894611459,-3.1524111293  
H,4.4499372078,-0.976416148,-2.9474516319  
H,3.352829336,0.1572009274,-2.0890852193  
H,5.7172902411,1.7269042874,0.5529953675  
H,5.5030424857,2.3865895974,-1.0962256063  
H,4.0826067318,1.7321081602,-0.1985333051  
---end---

### IN1-c

Electronic\_Energy=-1814.53782357  
Sum of electronic and thermal Free Energies = -  
1814.231600  
Charge=0            Multiplicity=1

---Coordinates start---

C,-0.9410839697,1.0093992736,1.4755019328  
C,-1.8349381829,1.00275734,-2.0940942912

N,-0.5180733233,0.8556179875,-1.8921730271  
C,0.6385219197,0.7025947091,-1.719193713  
Ag,2.1483449865,0.1844282028,-0.433608674  
C,-2.6100572711,-0.1445585177,-2.4111193432  
O,-2.2087687808,-1.2980016577,-2.604990339  
O,-3.950567521,0.1738867336,-2.4760720871  
C,-4.8226970585,-0.9330836483,-2.7158325145  
O,0.2526523076,0.8633040339,1.7777985366  
C,-1.4193344328,2.3470540358,1.0246955337  
C,-0.4831205165,3.2763398681,0.5359745631  
C,-2.7790885118,2.6949054854,1.0548678672  
C,-0.902247997,4.5173750344,0.0647721574  
C,-3.1960084249,3.9480854458,0.6045302182  
C,-2.2609359137,4.8559329291,0.0988549176  
Si,-1.9672218446,-0.6456825015,1.6093894908  
C,-1.8664469218,-1.1073844645,3.4382685346  
C,-0.992147922,-1.8793117632,0.5708563481  
C,-3.7615539213,-0.5845290331,1.0249169139  
O,3.8107161009,-0.3588035892,0.8317629917  
S,3.8277993726,-1.4991189283,1.9017808834  
C,2.4836164089,-1.1386962089,3.0660133403  
C,3.102872692,-2.9594448379,1.1076807507  
H,-2.2670424551,1.9770828224,-1.9119116302  
H,-4.6119934243,-1.4088464549,-3.6798919775  
H,-4.7368065418,-1.6869630634,-1.9255894724  
H,-5.8339118194,-0.5193499684,-2.7218627138  
H,0.5662259712,2.9994363992,0.511683208  
H,-3.5135009037,1.9959921206,1.439236731  
H,-0.1758069969,5.222987862,-0.3297432327  
H,-4.2491909593,4.2126498405,0.6401952329  
H,-2.5883339596,5.8250980423,-0.2680636499  
H,-2.3258903009,-2.0883560258,3.6164118795  
H,-0.8196994165,-1.1597045044,3.7632334085  
H,-2.3822652586,-0.3750779165,4.0720343503  
H,-1.2685131138,-2.9064869683,0.8452698506  
H,-1.1926516604,-1.7484157505,-0.4986264561  
H,0.082409882,-1.7593198257,0.7459805712  
H,-3.8649555415,-0.0820233116,0.0574459179  
H,-4.1297541893,-1.6130501763,0.9077076521  
H,-4.418658236,-0.0829668205,1.7455966441  
H,2.3472462235,-2.0125864164,3.7112889004  
H,2.7895140905,-0.2773221112,3.665869209  
H,1.5716467297,-0.9028170889,2.5102350418  
H,3.764014826,-3.2472759384,0.2861561157  
H,3.053166425,-3.7657787369,1.8468704301

H,2.1039493549,-2.7165159377,0.7320279985  
---end---  
**TS1-C-c**  
Electronic\_Energy=-1814.50752203  
Sum of electronic and thermal Free Energies = -  
1814.201359  
Charge=0            Multiplicity=1  
---Coordinates start---  
C,0.0076449165,1.3203120742,-0.1553665853  
C,-0.1656556325,1.1378192113,-2.1767842704  
N,1.1004320028,0.6135441399,-2.417146869  
C,2.1135944706,0.3992999606,-1.8308524488  
Ag,3.9554932119,-0.2055777083,-1.2381992353  
C,-1.2667694489,0.298092084,-2.7038055173  
O,-1.2111072154,-0.8949659398,-2.9585688101  
O,-2.3963214289,1.0325456302,-2.851749668  
C,-3.5415707055,0.3247317717,-3.360030507  
O,1.2653483833,1.0654964504,0.0871595176  
C,-0.4385437079,2.7646107448,0.0042520472  
C,0.4390431058,3.695020252,0.5799073844  
C,-1.7311215055,3.1937572274,-0.346985168  
C,0.0432096489,5.0178811648,0.795406716  
C,-2.1294325275,4.5132838588,-0.1297289324  
C,-1.2443196992,5.4331160236,0.4448303856  
Si,-1.019380824,-0.0533783077,0.7177979229  
C,-0.7405420012,0.2260043873,2.5714139162  
C,-0.2844026735,-1.716637246,0.2088048916  
C,-2.8934752628,-0.0469407131,0.4314383462  
O,5.8905139775,-0.8667236004,-0.5875285754  
S,6.1967452857,-1.4357110362,0.8381189671  
C,5.6025748036,-0.1939588251,2.0185911267  
C,4.9464891435,-2.7111934879,1.1531893783  
H,-0.242763971,2.1720595954,-2.5075410749  
H,-3.3619877649,0.0001988816,-4.3897693056  
H,-3.7754578132,-0.5484122719,-2.7453842536  
H,-4.3650930382,1.0395138618,-3.3292806706  
H,1.4335641775,3.358825648,0.8568612857  
H,-2.4139762498,2.4950777746,-0.8204825684  
H,0.739305896,5.7241390248,1.2427315868  
H,-3.131159787,4.8272141315,-0.414249681  
H,-1.5560542996,6.4604863205,0.615629475  
H,-1.2401178118,-0.5464434058,3.1712797733  
H,0.3290597406,0.2043195891,2.8122958796  
H,-1.1339080789,1.2000785446,2.8906883323  
H,-0.7497847251,-2.5426804929,0.7628366125



H,-0.4281186324,-1.8963876357,-0.8619695602  
H,0.792008472,-1.7276062264,0.4161771399  
H,-3.1694081572,-0.1946250837,-0.6168064185  
H,-3.3568219603,-0.8570105769,1.011801375  
H,-3.3433023854,0.8953630298,0.7668364323  
H,5.7149907886,-0.5968745326,3.0305464615  
H,6.2238506412,0.6976962019,1.9004509853  
H,4.5530862393,0.0365077866,1.8057260331  
H,5.1208395715,-3.5254055716,0.4450175025  
H,5.0705194019,-3.0733859686,2.1789711691  
H,3.948326079,-2.2827775904,1.009753396

---end---

### IN2-c

Electronic\_Energy=-1814.56451467

Sum of electronic and thermal Free Energies = -  
1814.250883

Charge=0            Multiplicity=1

---Coordinates start---

C,-0.325794406,1.4495403937,-0.3230418184  
C,-0.3392077157,1.40352783,-1.8951140863  
N,1.0026525346,0.9300795686,-2.2749402892  
C,1.7354901791,0.8689989558,-1.216899079  
Ag,3.7008959376,0.2452973823,-1.0923419856  
C,-1.420273866,0.5237646882,-2.5131472471  
O,-1.323722965,-0.6609243059,-2.7626635293  
O,-2.5311301398,1.2452310861,-2.7613171402  
C,-3.6353654488,0.5340348639,-3.357526437  
O,1.1078105939,1.2129543119,-0.0410220298  
C,-0.7419067885,2.7967389619,0.2250410626  
C,0.0455029834,3.4881081906,1.1582881  
C,-1.9715282671,3.357102268,-0.1628350208  
C,-0.3825428151,4.7096614013,1.6843990993  
C,-2.3992547654,4.5755855644,0.3678231477  
C,-1.6072898203,5.2580425072,1.2954844634  
Si,-1.164427607,0.0139876337,0.6952746903  
C,-0.9081745909,0.4388839939,2.5158385523  
C,-0.2850088261,-1.6018986596,0.2809679471  
C,-3.0151891879,-0.1075986639,0.3358504721  
O,5.7580678323,-0.4160426586,-1.0318854198  
S,6.4054621542,-1.2077340396,0.148824498  
C,6.0637899146,-0.2531052184,1.6536958076  
C,5.3078182965,-2.6128628603,0.483801284  
H,-0.4971771624,2.414783078,-2.2893506093  
H,-3.3452088001,0.130114438,-4.331501124  
H,-3.9700455565,-0.280771648,-2.7107829036

H,-4.4286470502,1.2731697626,-3.4743965368  
H,0.9959774957,3.0674141263,1.4670148911  
H,-2.5899617809,2.8417683158,-0.8915430662  
H,0.2450873693,5.2323451387,2.4020712985  
H,-3.3519930498,4.99275515,0.0513992939  
H,-1.9397302179,6.2069847936,1.7079593773  
H,-1.23924557,-0.3970664752,3.1462483846  
H,0.1487314899,0.6276587575,2.7388897652  
H,-1.4794206562,1.326818259,2.8101922653  
H,-0.7456725828,-2.4387478412,0.8226470168  
H,-0.3404985683,-1.8142384294,-0.7913870933  
H,0.7717713023,-1.5518372705,0.5689222087  
H,-3.215864939,-0.6185451528,-0.6111054497  
H,-3.5016567941,-0.6882694047,1.1309555321  
H,-3.4948277321,0.8773719796,0.3059132917  
H,6.4169480863,-0.8276491416,2.5162647448  
H,6.6155766229,0.6879142447,1.5803360637  
H,4.9873648473,-0.0631236254,1.7254035268  
H,5.3415428551,-3.2725556279,-0.3872344449  
H,5.6798394211,-3.1408444852,1.3677920478  
H,4.2893801439,-2.244585137,0.6476326376

---end---

### TS2-C-c

Electronic\_Energy=-1814.51819721

Sum of electronic and thermal Free Energies = -  
1814.210939

Charge=0            Multiplicity=1

---Coordinates start---

C,-0.9924733895,1.2428152409,-0.0408035781  
C,-0.7630794087,1.4244014159,-1.4359305685  
N,1.0195292874,0.8668996174,-1.8078739307  
C,1.4040158889,0.4628622529,-0.6791321626  
Ag,3.4022177637,-0.1872422757,-1.1091502203  
C,-1.4168535708,0.5769672009,-2.4686789074  
O,-1.8128949778,-0.5698723235,-2.3385715219  
O,-1.5204701472,1.2562898892,-3.6300901452  
C,-2.1128103835,0.5317729017,-4.7236075817  
O,0.9237621816,0.3868070029,0.4747141667  
C,-0.9675512389,2.504486889,0.7662615218  
C,-0.1869923035,2.6724034433,1.9245103517  
C,-1.8185851247,3.5613466016,0.3853269785  
C,-0.2478229443,3.8537140387,2.6644481537  
C,-1.8853221648,4.7399246038,1.1323404634  
C,-1.0984661316,4.893149523,2.2755345328  
Si,-1.9154071679,-0.2366454085,0.7652776549

C,-1.8946233297,-0.0010879481,2.6428800465  
C,-1.1424193977,-1.9216525242,0.4129342685  
C,-3.7249928823,-0.1371869452,0.2173622181  
O,5.4361614309,-0.8626887557,-1.5169113497  
S,6.5868912096,-0.8587537122,-0.4610170294  
C,6.6482789748,0.82237085,0.2177970883  
C,5.9334908967,-1.7024227969,1.0056379164  
H,-0.6415571081,2.4527003616,-1.7656927055  
H,-1.5217559769,-0.3567101255,-4.965552325  
H,-3.13547192,0.2289695361,-4.4793252782  
H,-2.1160281776,1.2233801669,-5.567451013  
H,0.4844675937,1.8780020696,2.2248890698  
H,-2.4440727962,3.4497978523,-0.4962453587  
H,0.3754659471,3.9626153422,3.548621336  
H,-2.5537130823,5.5371092711,0.816799609  
H,-1.1455270967,5.8106256956,2.8561788992  
H,-2.4482710267,-0.8298033157,3.1059054516  
H,-0.8774029382,-0.0159177369,3.0507312215  
H,-2.3713035588,0.9337985345,2.9587606181  
H,-1.8304665207,-2.724369744,0.7124180539  
H,-0.9171666619,-2.0409073581,-0.6490877254  
H,-0.2163819389,-2.0345125508,0.9871089279  
H,-3.826193089,-0.2912765732,-0.8611497587  
H,-4.3263780943,-0.8992669494,0.731386962  
H,-4.1524369144,0.8432442474,0.4660438506  
H,7.3756085486,0.8420309808,1.0359760818  
H,6.9705396948,1.4906521518,-0.5850714746  
H,5.6516696041,1.1040263488,0.575491572  
H,5.7638434262,-2.7481756565,0.7359692444  
H,6.6779841541,-1.6382464418,1.8060199147  
H,4.9942325616,-1.2250717778,1.3065518208  
---end---

### IN3-c

Electronic\_Energy=-1814.60824144

Sum of electronic and thermal Free Energies = -  
1814.299899

Charge=0            Multiplicity=1

---Coordinates start---

C,-2.0122867732,0.7284210948,0.4703953064  
C,-1.1473874626,0.751658517,-0.5733453088  
N,0.1698698478,-1.4051934587,3.3896012628  
C,-0.860765604,-1.402280026,4.008430904  
Ag,0.7191690947,-1.3837082628,1.3809748722  
C,-1.0544240516,-0.2535990545,-1.6500619238  
O,-1.686185408,-1.2942837526,-1.7406941299

O,-0.155746837,0.1403846701,-2.5818630569  
C,0.0830200367,-0.7960079236,-3.6488541738  
O,-1.8654883852,-1.3864625195,4.6700097783  
C,-1.948213199,1.9003263071,1.3912557017  
C,-1.8450744204,1.7396275401,2.784939213  
C,-1.9803359142,3.2093833954,0.8733318565  
C,-1.7485451344,2.8476023553,3.6274257083  
C,-1.9019061123,4.3176877068,1.7184997856  
C,-1.779559631,4.1416003362,3.099214351  
Si,-3.4156342674,-0.5766063245,0.7280053984  
C,-4.4385047688,-0.0936965918,2.2447002538  
C,-2.7697459433,-2.3260727191,1.0238618652  
C,-4.5699188458,-0.4432093231,-0.7625942516  
O,1.4821443924,-1.5503099928,-0.6360883947  
S,2.7515615026,-0.8159734028,-1.1711007613  
C,2.5425292495,0.9437181401,-0.7843562959  
C,4.0756719459,-1.1782439995,0.0152718548  
H,-0.4377943786,1.5711186773,-0.6640928266  
H,0.4406494172,-1.7461685677,-3.2436161598  
H,-0.8304672451,-0.9648291466,-4.2263593708  
H,0.8473075582,-0.3367775402,-4.2773283691  
H,-1.8294687171,0.7455161067,3.2141191019  
H,-2.0861443026,3.3535772046,-0.1983347058  
H,-1.655975783,2.6969884178,4.6999476987  
H,-1.938916599,5.3187499349,1.2965940722  
H,-1.7169507861,5.0035362295,3.7580700031  
H,-5.3593256654,-0.6937182164,2.2429688596  
H,-3.9164219952,-0.2981275218,3.1857208236  
H,-4.7323949226,0.9623808662,2.2363526724  
H,-3.5905381495,-3.0441480019,0.8864439103  
H,-1.968536982,-2.5912571441,0.3295914402  
H,-2.4058460569,-2.4359462679,2.0514978635  
H,-4.0551619187,-0.6695670534,-1.6998374823  
H,-5.4099826626,-1.1421170715,-0.6521703398  
H,-4.9894879666,0.5689232187,-0.8311685751  
H,3.492191875,1.4534523234,-0.9766322122  
H,1.7654400803,1.3328976169,-1.4434633799  
H,2.2515001612,1.0473439639,0.2666660086  
H,4.2644456347,-2.25441079,-0.0214345615  
H,4.974180926,-0.6295629141,-0.285587675  
H,3.7539291669,-0.8783370359,1.0187403887  
---end---

### TS1-S-c

Electronic\_Energy=-1814.51618155

Sum of electronic and thermal Free Energies = -

1814.204027  
Charge=0            Multiplicity=1  
---Coordinates start---  
C,0.1271742347,0.7022523817,0.0533869806  
C,-0.5449600774,0.9266915769,-1.7359604446  
N,0.2433387652,0.0630218248,-2.4850264246  
C,1.1459243332,-0.628370139,-2.7838791962  
Ag,2.6856336244,-1.12849426,-1.4052947413  
C,-1.999680301,0.6428622163,-1.9276734055  
O,-2.4803609085,-0.4571808207,-2.1439489689  
O,-2.7289813585,1.7670219401,-1.8028646926  
C,-4.1606289766,1.5999283535,-1.8495204148  
O,1.414824774,0.4189265971,-0.0209239986  
C,-0.1619122841,2.0823571828,0.6460706506  
C,0.9161971665,2.8902587115,1.04247573  
C,-1.4641267055,2.5553720615,0.8843523357  
C,0.7033410846,4.1345642949,1.6400962871  
C,-1.679205267,3.7972689457,1.4845810282  
C,-0.5964347003,4.5957768801,1.8652389158  
Si,-0.7513891187,-0.8061827776,0.9104128208  
C,0.1161521893,-0.9920098268,2.5847460585  
C,-0.483517319,-2.3684357775,-0.1186663226  
C,-2.6098246105,-0.6477630243,1.2607226932  
O,4.5330324496,-1.3806321068,-0.1992263321  
S,4.9966640189,-0.3122667323,0.8421853844  
C,4.7299063871,1.3125194209,0.0720324627  
C,3.6842201127,-0.2001616767,2.0913920941  
H,-0.2907090956,1.9620900964,-1.9596449454  
H,-4.4646323319,1.1497751833,-2.7983928441  
H,-4.5033958401,0.9732126681,-1.0213218065  
H,-4.5732711549,2.6050839573,-1.7561849561  
H,1.9239774736,2.5220673598,0.8843458432  
H,-2.3198915449,1.9613477742,0.5918882053  
H,1.5553525263,4.7413569659,1.9386309528  
H,-2.6969507042,4.1400538812,1.6554464328  
H,-0.7646439937,5.5609287993,2.3363118484  
H,1.1070641758,-1.4448979951,2.4756292292  
H,0.2423344039,-0.0223787286,3.0831111425  
H,-0.4746781525,-1.6342160889,3.2513430538  
H,-0.954251366,-3.2262200842,0.3813200662  
H,-0.935539945,-2.2628658933,-1.1101752102  
H,0.5814489588,-2.6006942559,-0.242305274  
H,-3.2015812327,-0.5032354665,0.3511852711  
H,-2.9543840845,-1.5806761715,1.7293145287  
H,-2.835042104,0.1680245734,1.9569825575

H,4.9859823088,2.0867599922,0.8030716222  
H,5.3958911621,1.3821936601,-0.7923363475  
H,3.6802046585,1.3944632981,-0.2305149237  
H,3.6544217758,-1.1564113479,2.619960717  
H,3.9478001526,0.6010373143,2.790459342  
H,2.7361064406,0.0098752623,1.5831669951  
---end---  
**IN2-S-c**  
Electronic\_Energy=-1814.51837140  
Sum of electronic and thermal Free Energies = -  
1814.203874  
Charge=0            Multiplicity=1  
---Coordinates start---  
C,-0.8066248745,0.3677807295,0.1481919993  
C,-1.3275741664,0.5529940048,-1.4101824956  
N,-0.7646788557,-0.4964799639,-2.1983113474  
C,0.1115627617,-1.2575703982,-2.4050737001  
Ag,1.7221152662,-1.4766662004,-0.9923667844  
C,-2.8328516195,0.5689209945,-1.6148431447  
O,-3.5380593008,-0.4216766644,-1.5892793947  
O,-3.281642708,1.8149386763,-1.8053376345  
C,-4.7165632123,1.964516538,-1.8762959721  
O,0.5409320831,0.131259201,0.1514230304  
C,-1.1259325653,1.7131728343,0.83319029  
C,-0.0664324804,2.5214087015,1.2750642228  
C,-2.4368915145,2.1588218824,1.0802124488  
C,-0.3048274729,3.7356415895,1.9241723958  
C,-2.6784149226,3.3699799865,1.7310869244  
C,-1.6124777731,4.1683212254,2.155989987  
Si,-1.5939381999,-1.1319805393,1.1335216909  
C,-0.5310231055,-1.3028407139,2.6897615589  
C,-1.5117475772,-2.7474604257,0.1493620731  
C,-3.3928242586,-0.9401044427,1.7143698032  
O,3.7191682855,-1.4769737441,0.0382387933  
S,4.1524549523,-0.2739560544,0.9345307168  
C,3.7431479242,1.2357375091,0.006770896  
C,2.8895016179,-0.1032511722,2.2287368745  
H,-0.8932855257,1.4897728229,-1.7703937207  
H,-5.1191957793,1.3956338017,-2.7183866526  
H,-5.1809300944,1.6228502615,-0.9468073151  
H,-4.8910112668,3.0312409542,-2.0179619054  
H,0.9475739791,2.178309523,1.1079967611  
H,-3.287016583,1.5604594887,0.7757582464  
H,0.5357259757,4.3413956981,2.2556187208  
H,-3.7035316162,3.6865413114,1.9076490787

H,-1.8001206444,5.1095502068,2.666457308  
H,0.4489412869,-1.7316105602,2.457205665  
H,-0.3668471756,-0.3321257085,3.1742854754  
H,-1.0258497725,-1.9600815619,3.4174499664  
H,-1.9246340279,-3.5594290765,0.7643344277  
H,-2.1084399426,-2.6800800946,-0.7662716559  
H,-0.4884641224,-3.0301449194,-0.1254451047  
H,-4.0848126708,-0.7500725788,0.8872302997  
H,-3.70294732,-1.8768203419,2.1989544362  
H,-3.5067190465,-0.1378285063,2.4523880859  
H,3.9934832466,2.1013844266,0.6290963651  
H,4.3547138544,1.2411729924,-0.8997756596  
H,2.67452746,1.2244638963,-0.2357611639  
H,2.9460462621,-0.9940462835,2.8598723425  
H,3.1312326932,0.7854490207,2.8220470456  
H,1.9082535463,-0.0092023263,1.7470007214  
---end---

#### TS2-S-c

Electronic\_Energy=-1814.51247412

Sum of electronic and thermal Free Energies = -  
1814.199573

Charge=0            Multiplicity=1

---Coordinates start---

C,-0.8558481109,0.5226402103,0.0857648759  
C,-1.4551477928,0.7039883395,-1.4628913278  
N,-0.6724129316,-0.1644604307,-2.2967878542  
C,0.3844213648,-0.6892691333,-2.1459409378  
Ag,2.1891389675,-1.3362728391,-1.4467968859  
C,-2.9258191807,0.386636059,-1.6755343699  
O,-3.3742893456,-0.72979035,-1.8518214214  
O,-3.6772793633,1.4970095098,-1.6330048278  
C,-5.1055182888,1.2979897247,-1.7188974547  
O,0.4629594767,0.176149529,0.0023358869  
C,-1.0578235382,1.8719116494,0.7945283281  
C,0.0616611436,2.5422546539,1.3128744063  
C,-2.3248710203,2.4408171803,1.0167805135  
C,-0.0737433765,3.747881106,2.0062081271  
C,-2.4628263392,3.6459972846,1.7088069917  
C,-1.3372516327,4.3091620048,2.2071545075  
Si,-1.64401502,-0.9270356807,1.116464528  
C,-0.7214727526,-0.9566222237,2.7732861523  
C,-1.3549240494,-2.5611838185,0.210365659  
C,-3.4948982193,-0.7697497917,1.5237579619  
O,4.0071542787,-1.4477490921,-0.2710016315  
S,4.2236503596,-0.4583978474,0.9277949198

C,3.8169964884,1.1998101321,0.3072600586  
C,2.7899413212,-0.6578073351,2.022866309  
H,-1.2595127486,1.7316208149,-1.7835008942  
H,-5.367062482,0.811966901,-2.6624544135  
H,-5.4573880891,0.6888331138,-0.881755711  
H,-5.5407240856,2.296454769,-1.6702551238  
H,1.0382951196,2.0952203851,1.1680518254  
H,-3.2143585122,1.9461400866,0.6471859733  
H,0.811233897,4.2461793892,2.3962690246  
H,-3.454887087,4.0649658566,1.8609455795  
H,-1.4456360769,5.2449705751,2.7496563031  
H,0.2177138085,-1.5147094822,2.6994425246  
H,-0.4853082285,0.0556883158,3.1237422171  
H,-1.3356465536,-1.4409580522,3.5440627691  
H,-1.685551456,-3.409393253,0.8253360273  
H,-1.9072686335,-2.5864244549,-0.7351058358  
H,-0.2890014715,-2.6948827647,-0.0083924981  
H,-4.1227084202,-0.7214888103,0.6277048615  
H,-3.8136771774,-1.6497813079,2.1003860202  
H,-3.7030194438,0.1145542467,2.1378607864  
H,3.9214022735,1.9074714765,1.1366092188  
H,4.5321491667,1.4440111315,-0.4827650019  
H,2.7892266655,1.1967161512,-0.0731646561  
H,2.8111059286,-1.6840538125,2.3992431514  
H,2.904030075,0.0434310457,2.8566716799  
H,1.8718820927,-0.4491241619,1.4561276573  
---end---

#### TS1-C-c-Et-TMS

Electronic\_Energy=-1853.83040036

Sum of electronic and thermal Free Energies = -  
1853.495981

Charge=0            Multiplicity=1

---Coordinates start---

C,0.182113329,1.4388674285,-0.3565693993  
C,-0.0482231895,1.2563067213,-2.2824196516  
N,1.2029119552,0.735633225,-2.6208780978  
C,2.2623160668,0.4933924642,-2.1532659833  
Ag,3.9766181839,-0.1993861307,-1.3219337145  
C,-1.1671723666,0.3868822862,-2.7434793759  
O,-1.0921467371,-0.8079176156,-2.9826116264  
O,-2.3112915192,1.0976210148,-2.8311490229  
C,-3.5109826309,0.3855461145,-3.2242807102  
O,1.4640509406,1.3011312473,-0.1197422723  
C,-0.3903915231,2.8356931584,-0.1285032501  
C,0.4321859264,3.8233035365,0.4332654216

C,-1.7324090106,3.1609923141,-0.3949086433  
C,-0.0626919148,5.0998475334,0.7128862236  
C,-2.2299457439,4.4346564055,-0.1141690831  
C,-1.3979039328,5.4123527391,0.4428465689  
Si,-0.667861785,-0.0188845383,0.5792716296  
C,-0.3698993757,0.3434177992,2.4152395103  
C,0.2381275889,-1.6022441453,0.0845967813  
C,-2.5358569125,-0.2659301107,0.3504408544  
O,5.7046191297,-0.9915520443,-0.3245138633  
S,5.688927296,-1.5763987143,1.1277714689  
C,4.9156689128,-0.3148834195,2.1765405445  
C,4.3513847343,-2.8002787053,1.166783812  
H,-0.1578170364,2.2782057501,-2.643831354  
H,-3.4689939886,0.2188258437,-4.3066786765  
H,-3.5343749351,-0.5905659333,-2.7334792274  
H,1.4648027872,3.5658954984,0.6473530238  
H,-2.3827425203,2.4213238884,-0.8484798603  
H,0.593990778,5.8504108758,1.1478019087  
H,-3.2698963255,4.6655251337,-0.3342100059  
H,-1.7868802743,6.4031634726,0.6641120942  
H,-0.699071306,-0.4921583574,3.0473405596  
H,0.6960908811,0.5160521305,2.6055467148  
H,-0.9160802324,1.2389689034,2.739418461  
H,-0.093199723,-2.4601032569,0.6849177442  
H,0.0643202494,-1.8337926813,-0.9722234886  
H,1.3155884367,-1.4700461976,0.2334899655  
H,-2.7931172895,-0.594211371,-0.6610300458  
H,-2.8870116008,-1.0427835262,1.0443236696  
H,-3.1000567404,0.6479841849,0.5699287376  
H,4.8306557751,-0.7154400376,3.1920404242  
H,5.5704263165,0.5605792412,2.1743572245  
H,3.9289173961,-0.0603975229,1.7755766938  
H,4.6341423775,-3.6197941015,0.5010252837  
H,4.250296331,-3.1701863965,2.1922945205  
H,3.4203029075,-2.3325074071,0.8289046249  
C,-4.6941822921,1.2447305576,-2.8289905551  
H,-4.640705106,2.2304160982,-3.3039273469  
H,-5.6236189595,0.7579562493,-3.1451858467  
H,-4.7270569783,1.3807810372,-1.7423776841  
---end---

**TS2-S-c-Et-TMS**

Electronic\_Energy=-1853.84289622

Sum of electronic and thermal Free Energies = -  
1853.501212

Charge=0            Multiplicity=1

---Coordinates start---

C,0.0309230005,0.8377006532,-0.5793100241  
C,-0.4182656046,0.8625944983,-2.1071536714  
N,0.6389854961,0.1377043147,-2.8150184694  
C,1.7844781093,0.0312624848,-2.478545138  
Ag,3.5673166527,-0.089179746,-1.5061726459  
C,-0.508275,2.2568501935,-2.7251030275  
O,0.376687351,2.8292896694,-3.3260938868  
O,-1.7260782595,2.7739592469,-2.4961902268  
C,-1.9542574499,4.1346464752,-2.9552773461  
O,1.3654742744,1.1116111397,-0.4894692196  
C,-0.3533668436,-0.5474228577,-0.0146246393  
C,-1.6489402105,-1.085716169,-0.1074736408  
C,0.6156880254,-1.2843549745,0.6786641701  
C,-1.9530533331,-2.3268195479,0.4568028014  
C,0.3177287636,-2.5262650127,1.2451827333  
C,-0.9702732106,-3.0562916262,1.1347361579  
Si,-0.7521997034,2.1905635842,0.5821823913  
C,-2.6463743948,2.1390596245,0.6584725121  
C,-0.1517082828,3.9143802712,0.066515057  
C,-0.093369346,1.8146681496,2.3146928206  
O,5.3137342647,-0.0192526935,-0.2348347747  
S,5.2063455349,0.0119114797,1.3280397894  
C,3.8587319072,1.1580594627,1.742557468  
C,4.4082276324,-1.5461655287,1.801847726  
H,-1.3746347042,0.3638337383,-2.2621999735  
H,-1.1356414108,4.7670869104,-2.6027736334  
H,-1.9400047713,4.1325485348,-4.0502252833  
H,-2.4340748292,-0.5340893401,-0.618805278  
H,1.6053458331,-0.8544419232,0.7679609743  
H,-2.9612850311,-2.7244201672,0.3675288523  
H,1.0917281814,-3.076162127,1.776532994  
H,-1.2092545378,-4.0211899609,1.5746314984  
H,-3.0235634775,2.9843318826,1.2509268682  
H,-3.0894651839,2.2050016032,-0.3404064837  
H,-3.0041240283,1.2177627595,1.1334889701  
H,0.4220590093,4.3702487413,0.8837221344  
H,0.5073087707,3.864171466,-0.8055954321  
H,-0.9863669712,4.5855765751,-0.16616199  
H,1.0003330827,1.8849501207,2.3407735625  
H,-0.4957653631,2.5385148583,3.0364970569  
H,-0.3766346654,0.8117703964,2.6555704445  
H,3.6475435103,1.0552755059,2.8120525309  
H,4.2210826354,2.1687775704,1.5338796538  
H,2.9679104647,0.9455222652,1.1369781553

H,5.1113821042,-2.353214144,1.5797690333  
H,4.1972456589,-1.5187606411,2.8755569524  
H,3.4867893154,-1.6737200115,1.2271852932  
C,-3.2928051175,4.5792521127,-2.4052679093  
H,-3.2830311728,4.5890336449,-1.3102698007  
H,-3.5112538744,5.5931019062,-2.7589187757  
H,-4.096191371,3.9152617215,-2.7424882416  
---end---

#### TS1-C-t-Et-TMS

Electronic\_Energy=-1853.83344910

Sum of electronic and thermal Free Energies = -  
1853.502242

Charge=0            Multiplicity=1

---Coordinates start---

C,-0.1522908063,0.8783654132,0.1105510661  
C,-0.4595804648,0.8025978378,-1.9500174032  
N,0.8318429062,0.4095126637,-2.2732314676  
C,1.8381120732,0.1186561714,-1.6966557924  
Ag,3.7478418129,-0.4186392986,-1.2678622458  
C,-0.8462511655,2.1322374294,-2.4565829726  
O,-0.0893060467,3.004902025,-2.8506200266  
O,-2.1870362107,2.2933278672,-2.3502097318  
C,-2.6982030696,3.6204789981,-2.610784954  
O,1.0391799526,0.3642971821,0.2509974154  
C,-0.2590370943,2.3653441529,0.3860985046  
C,0.9124129962,3.1359510344,0.4586616569  
C,-1.4898697531,3.0110357752,0.586320485  
C,0.858262266,4.5068839462,0.7110572334  
C,-1.5484845946,4.3831317582,0.8431558979  
C,-0.3745125712,5.1397217034,0.9045628483  
Si,-1.4954319575,-0.3761005671,0.6654558926  
C,-1.4820928877,-0.4338191343,2.5593305542  
C,-0.945273,-2.0498114899,-0.0177580989  
C,-3.2662375223,-0.0178954129,0.0804627661  
O,5.7482930944,-0.9841728718,-0.7272520078  
S,6.3404432317,-0.8456970916,0.7148622718  
C,6.0146883707,0.8612650791,1.2334933512  
C,5.1741248352,-1.6821891738,1.8232462137  
H,-1.1980223383,0.027798965,-2.1446979365  
H,-2.0991068583,4.3472654094,-2.0548153838  
H,-2.5931006785,3.8371666983,-3.6799205075  
H,1.8652757892,2.6349278877,0.3165912541  
H,-2.4137538464,2.4473405328,0.5243505016  
H,1.7787072035,5.0848664139,0.7585045202  
H,-2.5139682728,4.8602427382,0.9944363807

H,-0.4192534019,6.2073246738,1.104584403  
H,-2.1895260981,-1.180672247,2.943880324  
H,-0.4846041,-0.690303812,2.9381874676  
H,-1.761012191,0.5382541307,2.9867191734  
H,-1.5764640766,-2.859016233,0.3723563286  
H,-1.0004482276,-2.0853044687,-1.1131952728  
H,0.0921272338,-2.2509206496,0.2712707596  
H,-3.2924885259,0.4205276551,-0.9231098121  
H,-3.8474964565,-0.9499193487,0.0587092336  
H,-3.7855524459,0.6718763011,0.7574601862  
H,6.3261948222,0.9719865498,2.2771884107  
H,6.6089181707,1.5191629684,0.5937508984  
H,4.9462363948,1.0764291003,1.120731059  
H,5.1901415233,-2.7466518782,1.574596657  
H,5.5090401177,-1.5341831756,2.8551102936  
H,4.1713163953,-1.2669571482,1.6756081586  
C,-4.1483402331,3.6371919609,-2.1726912357  
H,-4.5823810707,4.6240434693,-2.3694807868  
H,-4.7325014107,2.8877695471,-2.7182977323  
H,-4.2315293929,3.4294801817,-1.1003169391  
---end---

#### TS2-S-t-Et-TMS

Electronic\_Energy=-1853.83746230

Sum of electronic and thermal Free Energies = -  
1853.498348

Charge=0            Multiplicity=1

---Coordinates start---

C,0.0816709353,1.0072737111,-0.4546520505  
C,-0.6046056193,0.9093347892,-1.9394012382  
N,0.2154900974,-0.0166881651,-2.6812653005  
C,1.3620710819,-0.306883654,-2.5070186052  
Ag,3.2062472507,-0.7036513318,-1.7244152433  
C,-0.5612095777,2.2578804654,-2.6546442308  
O,0.4302012967,2.7510742917,-3.1531462753  
O,-1.7609344732,2.8558131519,-2.5994647358  
C,-1.8016306998,4.2547909832,-2.9872995862  
O,1.4367991862,0.8867889813,-0.564649621  
C,-0.3448939455,2.3361227497,0.1867125611  
C,0.6378368016,3.2069771744,0.6791814793  
C,-1.6944161575,2.6975925834,0.3560712283  
C,0.2894314316,4.4041167137,1.3118042192  
C,-2.0450759434,3.8901052165,0.9905724382  
C,-1.0536143042,4.7522389361,1.4725539493  
Si,-0.481594153,-0.4597658949,0.6956790008  
C,0.3423316156,-0.1425658714,2.3696550272

C,0.1021881374,-2.1208570354,-0.0011730303  
 C,-2.3575133069,-0.6021076623,0.9533391108  
 O,5.0118505488,-0.8621664791,-0.5431872971  
 S,5.0197974579,-0.5222729079,0.9875001231  
 C,4.0918299172,1.0262893205,1.1847906511  
 C,3.8251865782,-1.6477791947,1.7611291872  
 H,-1.635731428,0.5577647311,-1.8934850695  
 H,-1.0531818253,4.7971212297,-2.4006616623  
 H,-1.5333117339,4.3360351857,-4.0455406829  
 H,1.6780693243,2.9267484707,0.5533360548  
 H,-2.4785638563,2.0544767906,-0.0290853963  
 H,1.0706515071,5.0636599155,1.6834757569  
 H,-3.0952963322,4.1479173068,1.1054742605  
 H,-1.3271398751,5.6798875802,1.9689804294  
 H,0.3023339433,-1.0344593582,3.0086679076  
 H,1.3933405786,0.1347872763,2.2387647132  
 H,-0.1555735209,0.6749419284,2.9061714366  
 H,-0.1144867363,-2.919523795,0.721666431  
 H,-0.4118550194,-2.372179405,-0.9371607136  
 H,1.1794121304,-2.1296841606,-0.1988309781  
 H,-2.9013893683,-0.6600507849,0.0013738987  
 H,-2.5866774835,-1.5182516486,1.5154052753  
 H,-2.7618030531,0.2431431916,1.5216275969  
 H,4.0080195693,1.2328213486,2.2571932238  
 H,4.6801049754,1.8143253219,0.7057518965  
 H,3.1015350973,0.9387325844,0.7142767799  
 H,4.2205031996,-2.6626129461,1.6656979255  
 H,3.7335097441,-1.3809368744,2.8187413014  
 H,2.8602372144,-1.5612061918,1.254821602  
 C,-3.2037705316,4.7562052819,-2.7139418201  
 H,-3.4454216262,4.666240812,-1.6496558372  
 H,-3.2769967752,5.81169016,-2.9990584633  
 H,-3.9426972044,4.1902097875,-3.2917065777  
 ---end---  
**TS1-C-c-Et-TES**  
 Electronic\_Energy=-1971.77399716  
 Sum of electronic and thermal Free Energies = -  
 1971.351776  
 Charge=0            Multiplicity=1  
 ---Coordinates start---  
 C,0.253732215,1.0968801287,-0.569952079  
 C,-0.1124927168,1.1201087312,-2.2627429002  
 N,1.0235862602,0.5720906648,-2.9067712686  
 C,2.1119861642,0.1954116976,-2.6400206143  
 Ag,3.7700489434,-0.3931652226,-1.626773967

C,-1.3508512286,0.3559700098,-2.6900322004  
 O,-1.3718274987,-0.8163662696,-3.0134028238  
 O,-2.4318304318,1.1510627692,-2.6574713921  
 C,-3.6965439254,0.5691798497,-3.0771697662  
 O,1.5284379843,0.7144883441,-0.355641742  
 C,-0.03205823,2.5337613271,-0.1015397243  
 C,0.9588150824,3.2343917338,0.6018630219  
 C,-1.2674207213,3.1705869139,-0.3100088681  
 C,0.722215021,4.5216406664,1.0926385606  
 C,-1.508552538,4.4555030607,0.1800851285  
 C,-0.5152628797,5.1381472551,0.8900705595  
 Si,-0.73002051,-0.2475239036,0.4552525452  
 C,-0.53739988,0.1919978927,2.2997382415  
 C,0.0431370093,-1.9313085205,0.0119307094  
 C,-2.6120194084,-0.5353957546,0.2500652969  
 O,5.3350812391,-0.9053879574,-0.2424758905  
 S,5.0667395807,-0.9031720259,1.30320319  
 C,4.2083409273,0.6534289993,1.6700141749  
 C,3.6754042809,-2.0368188516,1.5714652486  
 H,-0.2197157818,2.1617901586,-2.5722708585  
 H,-3.5783159817,0.1922592092,-4.0979168972  
 H,-3.9350071361,-0.275463214,-2.4256214138  
 H,1.9170790878,2.7495676594,0.7537230107  
 H,-2.041791897,2.6640386902,-0.8756780432  
 H,1.5068311746,5.0432964757,1.6366616643  
 H,-2.4739595912,4.9247211058,0.0043154227  
 H,-0.7033119318,6.1369424858,1.2759791837  
 H,-1.0831555938,-0.5860347417,2.8553985426  
 H,-1.1039235933,1.1193197687,2.4696976377  
 H,-0.5106709137,-2.3309057319,-0.8493152714  
 H,1.062620609,-1.738162118,-0.3386714766  
 H,-2.8097667973,-0.8830968947,-0.7698724779  
 H,-2.7945229094,-1.4168060397,0.8872886659  
 H,3.9662916926,0.660977844,2.7376263248  
 H,4.9051425163,1.4653573734,1.4437237049  
 H,3.2986524663,0.7307433643,1.0608709589  
 H,3.9993207535,-3.0333173341,1.2595789593  
 H,3.4357032455,-2.0404904145,2.6391324992  
 H,2.819017143,-1.7026286913,0.9797381033  
 C,-4.7424755873,1.6602122928,-2.9918202338  
 H,-4.4804035505,2.505759484,-3.6370054375  
 H,-5.7093119427,1.2618814924,-3.319081182  
 H,-4.8487234484,2.0219368123,-1.9637826018  
 C,0.0540356539,-2.9674034416,1.1481489841  
 H,0.4842309748,-3.9244490143,0.8210775728

H,0.644642574,-2.6223327628,2.0052611746  
H,-0.9581693127,-3.1799895365,1.5173670024  
C,0.8737043017,0.3481509538,2.8797700806  
H,1.4691327223,-0.5603245523,2.7422253585  
H,1.4104530893,1.1627796082,2.3890980273  
H,0.8449663221,0.5631626189,3.957745224  
C,-3.6065850409,0.5668428984,0.64074121  
H,-3.5298722281,1.4370806119,-0.017244773  
H,-4.6446627475,0.2104079632,0.5852813018  
H,-3.4390440605,0.918863188,1.6663650222

---end---

### TS2-S-c-Et-TES

Electronic\_Energy=-1971.77938089

Sum of electronic and thermal Free Energies = -  
1971.355251

Charge=0            Multiplicity=1

---Coordinates start---

C,0.1364736959,0.6699218764,-0.7206142087  
C,-0.1286989585,0.5958907229,-2.2973244954  
N,1.0396619955,-0.1183090968,-2.8280729512  
C,2.1381217768,-0.1818170807,-2.3535068778  
Ag,3.7783943603,-0.1868878695,-1.1409867336  
C,-0.2686205987,1.929830108,-3.0263141719  
O,-1.3507216929,2.3917180184,-3.3396656297  
O,0.9015343716,2.52785644,-3.2610934476  
C,0.8502198945,3.8202364815,-3.9218268554  
O,1.4414001683,0.9850489769,-0.4829558622  
C,-0.2763258504,-0.7151442752,-0.1696725199  
C,-1.5737873543,-1.2368006582,-0.3079892453  
C,0.6699564263,-1.4858874531,0.5163328877  
C,-1.9080565031,-2.4836656452,0.225802714  
C,0.3447397082,-2.7355260613,1.0492536595  
C,-0.9504627449,-3.240680862,0.9093269289  
Si,-0.7719948681,2.0868160867,0.2787644207  
C,-2.6661719567,1.9157123324,0.4251793293  
C,-0.3377610813,3.7760381191,-0.4822119478  
C,-0.1151274475,2.0859776241,2.0656332929  
O,5.3041088966,0.0114687113,0.3797201086  
S,4.9665414549,0.0703246034,1.9086632508  
C,3.5093192003,1.1415069884,2.0853480201  
C,4.1919963791,-1.5191231442,2.3120301769  
H,-1.0338738181,0.0360710479,-2.5275098441  
H,0.3779866689,3.692192953,-4.9013486484  
H,0.2285111848,4.4942355168,-3.325794067  
H,-2.3342640541,-0.6697869125,-0.8382027555

H,1.6644621611,-1.0747576769,0.6326679811  
H,-2.9197608505,-2.8644534015,0.1074381276  
H,1.1017855451,-3.3090425077,1.580032095  
H,-1.2127307123,-4.2093942186,1.3269793101  
H,-0.9990434944,3.9506060282,-1.3387755503  
H,0.679675275,3.7060140801,-0.8846382367  
H,-0.6027880412,2.949816831,2.5421168842  
H,0.9549547135,2.3271335462,2.0383229241  
H,3.1346328767,1.036452218,3.1086328048  
H,3.8439222777,2.1693116636,1.9183875214  
H,2.7422051521,0.8723594377,1.3473737441  
H,4.9561406124,-2.2931422438,2.2020932151  
H,3.8429034757,-1.4821235146,3.3487738614  
H,3.3591280023,-1.7041352256,1.6287055737  
C,2.2746819916,4.3193893324,-4.0370288271  
H,2.8874088321,3.6252413882,-4.6228157749  
H,2.2814818149,5.2938793799,-4.5379432171  
H,2.7273593696,4.4366770714,-3.046082074  
C,-3.4954062913,2.0530953239,-0.860379931  
H,-3.3427657,3.0296374166,-1.3340481074  
H,-3.2222702601,1.3002490941,-1.6078593225  
H,-4.5703200931,1.9468298371,-0.6582035799  
H,-2.8892127779,0.9578100241,0.9141289259  
H,-2.9807437928,2.6890234673,1.1438637463  
C,-0.4394694673,4.9663119682,0.4876073383  
H,-0.2364148284,5.9163625906,-0.0253763888  
H,-1.4399531834,5.0474571059,0.9327032143  
H,0.2787295025,4.8815888593,1.3116096235  
C,-0.3504568011,0.8458090756,2.9428621861  
H,0.2375113785,-0.0106339599,2.6008909664  
H,-0.0734122391,1.0391916642,3.9885983596  
H,-1.4038242814,0.5372391164,2.9381481686

---end---

### TS1-C-t-Et-TES

Electronic\_Energy=-1971.77382892

Sum of electronic and thermal Free Energies = -  
1971.357162

Charge=0            Multiplicity=1

---Coordinates start---

C,-0.0813524253,1.0674171932,0.4273423606  
C,-0.4818448436,0.9942064749,-1.6317451474  
N,0.7966545917,0.600628237,-2.0044205804  
C,1.8341150111,0.3376296526,-1.4705713776  
Ag,3.7371722153,-0.2502359458,-1.0759787359  
C,-0.933140658,2.3217185728,-2.0844738824



O,-2.11089198,2.6518168031,-2.1475169172  
O,0.0890045457,3.1694895762,-2.3200748777  
C,-0.2655014496,4.5570247783,-2.5264548692  
O,1.1545067764,0.6442493359,0.4931839677  
C,-0.2917373117,2.531697678,0.7498004407  
C,0.8263274677,3.3570146665,0.9535891398  
C,-1.5691109172,3.1032969504,0.8733875464  
C,0.6777863834,4.7083867314,1.26578044  
C,-1.721872874,4.4544943266,1.1942412715  
C,-0.6002256837,5.2655247,1.3898152638  
Si,-1.2205224776,-0.3152720101,1.1241300111  
C,-0.8632890288,-0.4211848031,2.9921365761  
C,-0.6722141922,-1.9212039071,0.2715604662  
C,-3.1104945583,-0.1366267855,0.9634504934  
O,5.7057062008,-0.8930804185,-0.504908738  
S,6.1862830732,-1.0203372706,0.9790260332  
C,5.8299834839,0.5739366692,1.7675462486  
C,4.9353630164,-2.0152112562,1.8367910157  
C,1.025437352,5.3476267198,-2.5844598598  
C,0.5873029217,-0.7619361046,3.3713218951  
C,-3.6903776507,-0.0256530277,-0.4560605607  
C,-1.2839285843,-3.1969842325,0.8741611977  
H,-1.2282068222,0.2260525081,-1.8120180256  
H,-0.8398895803,4.6458738245,-3.4552290544  
H,-0.9024405874,4.8838975685,-1.6991168508  
H,1.8123100894,2.9122156264,0.8630935193  
H,-2.4504065819,2.4980102586,0.6941113764  
H,1.5582991508,5.328708004,1.4182744568  
H,-2.720616235,4.8751791352,1.2851217938  
H,-0.7197393242,6.3170945139,1.6382399707  
H,-0.9169130318,-1.8658186758,-0.7986143782  
H,0.422903252,-1.9610425254,0.3277792122  
H,-3.5264222906,-1.028849241,1.4572160587  
H,-3.4462653646,0.7127460546,1.5746089307  
H,6.0658442723,0.4927909068,2.83369437  
H,6.4717664038,1.3246532595,1.2990858987  
H,4.7735518697,0.8239062798,1.6207750687  
H,4.9627560377,-3.0207397981,1.4086881956  
H,5.1949680174,-2.0542394924,2.8998164533  
H,3.9484933547,-1.5617801506,1.6931886263  
H,0.8009152997,6.4087315688,-2.7418037351  
H,1.5808247987,5.2466128347,-1.646000476  
H,1.6613915062,5.0037389923,-3.4080285442  
H,0.727834619,-0.7909606315,4.4608193866  
H,0.8821629687,-1.7431052594,2.9771102576

H,1.2837534755,-0.0258786942,2.9556239446  
H,-1.5475513012,-1.1659487377,3.4254575199  
H,-1.147889325,0.5400357086,3.4462216002  
H,-4.7891934885,-0.0220412501,-0.4421253107  
H,-3.362709361,0.8905332005,-0.9592674952  
H,-3.3784725557,-0.8728367688,-1.0812194325  
H,-0.9301953811,-4.1001854885,0.3585560973  
H,-1.0256469894,-3.3067191723,1.9352874213  
H,-2.3793553004,-3.1930676632,0.8050543228  
---end---

### TS2-S-t-Et-TES

Electronic\_Energy=-1971.77781415

Sum of electronic and thermal Free Energies = -  
1971.354751

Charge=0            Multiplicity=1

---Coordinates start---

C,0.1270100868,1.045764535,-0.4725834232  
C,-0.5084996399,0.9801677939,-1.9941592003  
N,0.3703827384,0.1271613907,-2.747569266  
C,1.5152921023,-0.1544892064,-2.5636436464  
Ag,3.3536796541,-0.5280543531,-1.7622045489  
C,-0.5006808666,2.3563498032,-2.6562629719  
O,0.489612194,2.9166346063,-3.0810428939  
O,-1.731492325,2.8889638668,-2.6519312758  
C,-1.8253411142,4.2937616365,-3.0091077022  
O,1.4808931254,0.9030472808,-0.5258932652  
C,-0.3056990708,2.3783002778,0.1570862406  
C,0.6696894396,3.2464784841,0.6674459183  
C,-1.656600185,2.7440943967,0.2988236323  
C,0.3122890218,4.4405094251,1.3006554615  
C,-2.0172613754,3.9340749576,0.9322659638  
C,-1.0332795679,4.7899809077,1.4399609767  
Si,-0.4788294558,-0.436914593,0.6458636594  
C,0.3792557381,-0.2100180045,2.3311054938  
C,0.09077585,-2.0937508353,-0.1047897845  
C,-2.3626101445,-0.5499133676,0.928360176  
O,5.1149088634,-0.6972456826,-0.5152932333  
S,5.0186729286,-0.4869108715,1.036100173  
C,4.081943328,1.0466997443,1.297766582  
C,3.7711861253,-1.6663296849,1.6254689339  
H,-1.5233095461,0.5816315237,-1.9953106541  
H,-1.1364980968,4.8584861832,-2.3729095325  
H,-1.5087987752,4.4145700116,-4.050097637  
H,1.7113064376,2.9632890697,0.561782061  
H,-2.4335110349,2.1036600258,-0.104556622

H,1.0876867201,5.09682107,1.6898592151  
H,-3.0688951579,4.1938770508,1.0281285087  
H,-1.3139348103,5.7147658292,1.9377133744  
H,0.4761252684,-1.2026975318,2.7949207194  
H,1.4018129218,0.1303073671,2.1309896811  
H,0.1615599592,-2.8175171205,0.7209868504  
H,1.1145904743,-1.9675697106,-0.4793741081  
H,-2.8736369546,-0.6222190036,-0.0426168805  
H,-2.7180716535,0.3812408262,1.3872101735  
H,3.9333916156,1.1680122513,2.3762188781  
H,4.6994324967,1.8663112887,0.918843645  
H,3.1208320606,0.9989388697,0.7654721973  
H,4.1788981342,-2.6713450246,1.4870346042  
H,3.5902466097,-1.4794883112,2.6884830903  
H,2.851191183,-1.5413382954,1.0472326701  
C,-3.2637522202,4.715636774,-2.7976475094  
H,-3.5539302676,4.5881678956,-1.7493818133  
H,-3.3778458236,5.7724345652,-3.063736071  
H,-3.9417055492,4.1261716721,-3.4246239227  
C,-0.3035253436,0.7510355267,3.3208512205  
H,-0.3546041954,1.7719996344,2.9262115593  
H,-1.3293823794,0.4368773844,3.5491049014  
H,0.241424655,0.7973720709,4.2740181948  
C,-2.7711949677,-1.7398476558,1.8175941467  
H,-3.8587332167,-1.7786551627,1.9690636443  
H,-2.4699234208,-2.6995621732,1.380240382  
H,-2.3079105935,-1.6765847309,2.8104376032  
C,-0.8040160824,-2.6780340042,-1.2117192671  
H,-0.4003140583,-3.6242404134,-1.5979596211  
H,-1.8168215259,-2.8835246588,-0.845372848  
H,-0.8989606635,-1.9960333615,-2.063971814  
---end---

#### TS1-C-c-Et-TBS

Electronic\_Energy=-1971.77980606

Sum of electronic and thermal Free Energies = -  
1971.358703

Charge=0            Multiplicity=1

---Coordinates start---

C,0.280042412,1.0178792862,-0.5107732942  
C,-0.0739202388,0.9978804272,-2.2452461688  
N,1.0737496145,0.430200459,-2.8426440222  
C,2.1667466131,0.085729122,-2.5513897941  
Ag,3.8802490572,-0.3294352676,-1.5418099382  
C,-1.3123580612,0.2603759802,-2.7041472337  
O,-1.3509643611,-0.9083663806,-3.0411773195

O,-2.3772011495,1.0785005725,-2.6871940366  
C,-3.6511922532,0.525421275,-3.1121280724  
O,1.5401351601,0.6116806593,-0.2937741661  
C,0.0130121093,2.4771456935,-0.1183203771  
C,1.0241655027,3.2174167818,0.5105386029  
C,-1.2375524393,3.0912726162,-0.3097779206  
C,0.7940434084,4.5251774386,0.9473162568  
C,-1.4709882189,4.3964568078,0.1268391669  
C,-0.4570639613,5.1202819895,0.7639731263  
Si,-0.7661184889,-0.271443426,0.504263127  
C,-0.5578765864,0.0198774876,2.4067767566  
C,-0.0883163381,-1.9725944677,0.0254151108  
C,-2.6450663242,-0.3044990726,0.1882018457  
O,5.5045800594,-0.6019285351,-0.1496508527  
S,5.2473252182,-0.5618475432,1.3971778597  
C,4.1799649982,0.8737510547,1.704483712  
C,4.0352724675,-1.8690112901,1.7317124497  
H,-0.15261071,2.0398614724,-2.5609114076  
H,-3.6061007477,0.3656453587,-4.1948204268  
H,-3.804212603,-0.4433724345,-2.6310084452  
H,1.9900077003,2.7453532885,0.6562830461  
H,-2.0304513778,2.548084915,-0.8138108559  
H,1.5928689534,5.0789354902,1.4360876863  
H,-2.4471539753,4.8495309558,-0.0308183557  
H,-0.640080468,6.1348396613,1.1089345574  
H,-0.7362028722,-2.7781879065,0.3938007176  
H,-0.0431613229,-2.0510178727,-1.0672130323  
H,0.9210439706,-2.1310618663,0.418801106  
H,-2.8754050232,-0.8468118891,-0.7337624806  
H,-3.1499249918,-0.8358550988,1.0053578868  
H,-3.0905527818,0.6931260454,0.1205063531  
H,3.9379810643,0.8900725514,2.7720822575  
H,4.758011387,1.7649318002,1.4437999218  
H,3.2693238233,0.8013098416,1.0964125562  
H,4.5136398313,-2.8251513347,1.5027597651  
H,3.7660881585,-1.8303895959,2.7918137338  
H,3.1542301307,-1.7163191836,1.1004312755  
C,-4.7229044025,1.5232598423,-2.7280276649  
H,-4.539223983,2.4967990968,-3.1953524303  
H,-5.6997657914,1.1572076314,-3.0631235914  
H,-4.7573081627,1.6563262664,-1.6412478234  
C,-1.0438897932,-1.2536895916,3.1355116742  
H,-0.9792315899,-1.1144570693,4.2259218665  
H,-2.0880577553,-1.5002771655,2.9050375094  
H,-0.4309171391,-2.1277861047,2.8822368163

C,0.9040203092,0.2745416125,2.8131186967  
H,1.5597098162,-0.548721035,2.5121152203  
H,1.295873522,1.1877122824,2.3597489399  
H,0.9818620986,0.3775278737,3.9077504079  
C,-1.4171535976,1.2127755849,2.8777699178  
H,-1.0847708933,2.1585316025,2.4354693207  
H,-2.477809975,1.0828683478,2.629612966  
H,-1.3503437885,1.3210379186,3.9717202568  
---end---

#### TS2-S-c-Et-TBS

Electronic\_Energy=-1971.78415149

Sum of electronic and thermal Free Energies = -  
1971.359427

Charge=0            Multiplicity=1

---Coordinates start---

C,-0.0220862888,0.7295358262,-0.7368445927  
C,-0.3487025207,0.6954887545,-2.2846404688  
N,0.7296699045,-0.1296531704,-2.8566689349  
C,1.8476991216,-0.1866957607,-2.4211164885  
Ag,3.5834710313,-0.2662912986,-1.370677328  
C,-0.2636288097,2.0481112804,-3.0018805845  
O,0.7527592328,2.5583506673,-3.4233491606  
O,-1.4846189679,2.5907565658,-3.1271250949  
C,-1.5481567171,3.877629824,-3.8021490062  
O,1.2996363831,1.0448146729,-0.5785019533  
C,-0.3690224891,-0.6564467085,-0.1409185319  
C,-1.5016621774,-1.4154016371,-0.4804859623  
C,0.5045365042,-1.1892139153,0.819853927  
C,-1.7452222896,-2.6564597556,0.1149470881  
C,0.2630233282,-2.4245052577,1.4249534287  
C,-0.8661386393,-3.1687357477,1.07387562  
Si,-0.8648702028,2.1333562639,0.3441262005  
C,-2.7777468755,2.0320330004,0.6451354784  
C,-0.4338573207,3.8300743602,-0.3789223928  
C,-0.0358923053,2.0154175786,2.0427083808  
O,5.2543905847,-0.1307634178,-0.0096168463  
S,5.0336376293,0.0482743691,1.532132274  
C,3.71317377,1.2799871035,1.7330544349  
C,4.1281408494,-1.4272448806,2.0758581993  
H,-1.3176890659,0.2541729543,-2.5098276158  
H,-0.8323945,4.5584977018,-3.3339883494  
H,-1.2464541406,3.7291586245,-4.8443393383  
H,-2.2115653579,-1.0495960105,-1.2154084064  
H,1.3804992393,-0.6111148064,1.0829641293  
H,-2.6268690908,-3.2237870877,-0.1738104327

H,0.9608968756,-2.8039948355,2.1684301932  
H,-1.059482545,-4.1324859338,1.5379334289  
H,-0.3239590416,4.5598464674,0.4333351617  
H,0.5174491527,3.7791881692,-0.9177639049  
H,-1.2018950229,4.2059291511,-1.0602740209  
H,1.0104295242,2.3317225947,1.9787240565  
H,-0.5443877016,2.6735747662,2.7592408104  
H,-0.0571747062,0.9989955605,2.4498362585  
H,3.4218825171,1.2932088038,2.7883113921  
H,4.134048188,2.250493952,1.4547230835  
H,2.8584139226,1.0408286255,1.0871314986  
H,4.8163020991,-2.2744714345,2.0136521983  
H,3.8077371575,-1.2812027604,3.1122408708  
H,3.2679208833,-1.5862440109,1.4197031793  
C,-2.9702334148,4.3844933642,-3.6911808829  
H,-3.2440021154,4.5679220633,-2.6468946318  
H,-3.0612192891,5.3277335656,-4.2414449907  
H,-3.678022292,3.6658139384,-4.1182340866  
C,-3.1179806423,0.9421605631,1.6838878999  
H,-2.8304384125,-0.0589743838,1.3460714937  
H,-2.623003396,1.1242785207,2.6457178092  
H,-4.2026412944,0.9257803519,1.8741801973  
C,-3.5712842529,1.7634534586,-0.6466114917  
H,-3.371720129,2.5150240928,-1.4163051413  
H,-3.3351957481,0.7844465752,-1.0772990093  
H,-4.652951575,1.7763795901,-0.4392218357  
C,-3.2312316214,3.3954862005,1.2174917911  
H,-4.3024365652,3.3620762372,1.4705231569  
H,-2.6918019902,3.6638496945,2.135381819  
H,-3.0934903638,4.2123294197,0.498701264  
---end---

#### TS1-C-t-Et-TBS

Electronic\_Energy=-1971.77989528

Sum of electronic and thermal Free Energies = -  
1971.363382

Charge=0            Multiplicity=1

---Coordinates start---

C,-0.1361629138,0.9806214952,0.1043104397  
C,-0.4693262472,0.8517266529,-1.9557031788  
N,0.8226206296,0.4617758281,-2.2829803695  
C,1.834469666,0.201937749,-1.6984250006  
Ag,3.7321977832,-0.3613822349,-1.2464002193  
C,-0.8763951532,2.1626086907,-2.4947575068  
O,-0.1331891867,3.038820927,-2.9065310693  
O,-2.2205578833,2.3018741824,-2.398418098

C,-2.754396142,3.6111039874,-2.701700615  
O,1.0791024139,0.5159588554,0.2307967042  
C,-0.2942401131,2.4688726702,0.3455237417  
C,0.8533511763,3.2703934136,0.4540075533  
C,-1.5481824185,3.0872073384,0.4846379801  
C,0.7551112171,4.6435200479,0.6838344504  
C,-1.6505812486,4.4600287351,0.7174698554  
C,-0.4991600714,5.2476169714,0.8166362041  
Si,-1.4066320961,-0.3354748422,0.6973807776  
C,-1.2843488265,-0.4901705127,2.6153465342  
C,-0.8537298636,-1.9677265116,-0.0848281043  
C,-3.2105178536,-0.0039428197,0.2062436185  
O,5.6982981524,-0.970708688,-0.6308437055  
S,6.199890643,-0.9216839221,0.8510197152  
C,5.8722248015,0.761766124,1.4404322457  
C,4.9521729624,-1.7911406476,1.8398194209  
H,-1.2035509766,0.0670418389,-2.1227035387  
H,-2.1708747981,4.3655555795,-2.1665932758  
H,-2.6481182691,3.796034554,-3.7766789749  
H,1.8234706395,2.7918957994,0.3608815647  
H,-2.4540164373,2.4997049391,0.396874043  
H,1.6587665081,5.2441928572,0.7618917956  
H,-2.6330635817,4.9144422132,0.8221437824  
H,-0.5788597055,6.316259501,0.9995185276  
H,-1.3278900364,-2.8244985972,0.410484814  
H,-1.1132876284,-2.0203162619,-1.1494826572  
H,0.2323055506,-2.0768822243,0.0029053397  
H,-3.2798830823,0.4292408751,-0.7984055983  
H,-3.7785344338,-0.9435083019,0.2073782555  
H,-3.7122798515,0.6823364684,0.8989411149  
H,6.1230966923,0.8110371792,2.5048797162  
H,6.5150693852,1.4403663896,0.8735442068  
H,4.816349583,1.0044953302,1.2774906896  
H,4.9659208853,-2.8416312146,1.5376743071  
H,5.2251126704,-1.7022565385,2.8964523214  
H,3.9669602739,-1.3497405792,1.6539071079  
C,-4.2065977346,3.6156028124,-2.2704462132  
H,-4.6571466376,4.5878080361,-2.5002200145  
H,-4.7747008855,2.8389705404,-2.794519736  
H,-4.2913744251,3.4403529631,-1.1923884443  
C,-2.3642988861,-1.4689838842,3.1209634999  
H,-2.2889649866,-1.5933194734,4.212616227  
H,-3.3781075882,-1.1090734533,2.9042828413  
H,-2.2608332668,-2.4660713519,2.6737076642  
C,-1.503104047,0.8803220251,3.2874152356

H,-0.7192043331,1.5969107538,3.0164389089  
H,-2.4678751336,1.3263680678,3.0137834443  
H,-1.4904196301,0.7756741987,4.3836039519  
C,0.1066040088,-1.0221888545,3.0155900085  
H,0.2864411489,-2.0299430201,2.6195176055  
H,0.9051423884,-0.3716951759,2.6411138521  
H,0.196244633,-1.080259361,4.1118661134  
---end---

### TS2-S-t-Et-TBS

Electronic\_Energy=-1971.77889642

Sum of electronic and thermal Free Energies = -  
1971.355489

Charge=0            Multiplicity=1

---Coordinates start---

C,0.0430007712,1.0641389828,-0.4338117305  
C,-0.5813580537,0.9786255158,-1.958780591  
N,0.2728388924,0.0759044594,-2.6821476519  
C,1.4178651258,-0.2083644247,-2.5076376489  
Ag,3.2771209639,-0.5447819461,-1.7421623732  
C,-0.5195623879,2.3308122934,-2.6710768031  
O,0.4966840088,2.8567302342,-3.0772898221  
O,-1.7404243559,2.8811462852,-2.7465152732  
C,-1.7973231319,4.2696399341,-3.1693367849  
O,1.393247935,0.8875407746,-0.4747015852  
C,-0.3487438724,2.4202730556,0.1744802273  
C,0.641547578,3.200862786,0.7899168604  
C,-1.6689126259,2.9045154668,0.1878491312  
C,0.33006516,4.4258838189,1.3871167638  
C,-1.9834180325,4.1301599176,0.7774529648  
C,-0.983862139,4.899624191,1.3825903453  
Si,-0.5432556623,-0.4170338387,0.7142587008  
C,0.3477054184,-0.1257258765,2.3606518495  
C,0.0975852502,-2.0337170842,-0.0456121057  
C,-2.4283573956,-0.6887465801,1.1119206909  
O,5.0751594035,-0.6896724152,-0.5516801379  
S,5.037421011,-0.4765918493,1.0014971867  
C,4.0457890884,1.0148600171,1.2992953956  
C,3.8720540681,-1.7066701199,1.6508502957  
H,-1.6079266581,0.6183607855,-1.9636586712  
H,-1.1189498011,4.8509328567,-2.5369312165  
H,-1.446250302,4.3371375449,-4.2040097502  
H,1.6604472166,2.8300280971,0.7857265901  
H,-2.457882848,2.3313562989,-0.284284219  
H,1.1178423115,5.0108597635,1.8568388917  
H,-3.0119480469,4.4830530401,0.76375184

H,-1.2286159967,5.8524560403,1.8451785775  
H,0.1535430455,-0.9429641699,3.0672251061  
H,1.4278364635,-0.0643106609,2.2005835242  
H,0.0276838984,0.8093967453,2.8354701229  
H,0.055569841,-2.8441795605,0.6926273433  
H,-0.4864783992,-2.3477616041,-0.9196510769  
H,1.1382580865,-1.9192007268,-0.3618070569  
H,3.9256625885,1.1264514355,2.3823043669  
H,4.6153013912,1.8612917946,0.9045610984  
H,3.0716740015,0.9299059522,0.7964262875  
H,4.3121553247,-2.6939978101,1.4869112957  
H,3.7429416712,-1.5290095698,2.723163165  
H,2.9164579954,-1.619234991,1.125990068  
C,-3.2340174631,4.7240426363,-3.0231685142  
H,-3.5579231022,4.6538992213,-1.9793094317  
H,-3.3220713918,5.7678462154,-3.3446052806  
H,-3.9030498369,4.1147091551,-3.6406343452  
C,-2.932485986,0.2969177822,2.1866702167  
H,-2.8174876842,1.3434345257,1.8877163024  
H,-4.0023240023,0.127485124,2.3864899468  
H,-2.4011691463,0.1647297072,3.1372342867  
C,-3.3116753787,-0.5692060483,-0.1459267113  
H,-3.3458704613,0.4546212094,-0.5345166542  
H,-2.9650578766,-1.2235424479,-0.9569101337  
H,-4.348917072,-0.8598009986,0.0835942721  
C,-2.5968094425,-2.1194145605,1.6751340161  
H,-3.6365596484,-2.2756966004,2.0029431768  
H,-2.3743644718,-2.8885418252,0.9262805291  
H,-1.9528492771,-2.3026906549,2.5452321733

---end---

#### TS1-C-c-Et-TBS-CC

Electronic\_Energy=-2454.40121754

Sum of electronic and thermal Free Energies = -  
2454.028741

Charge=0            Multiplicity=1

---Coordinates start---

C,0.1286061763,0.9386876666,0.5055882224  
C,-0.1607043679,0.6187461095,-1.6175269489  
N,1.0710744401,-0.0006561929,-1.7453096144  
C,2.051280785,-0.187426377,-1.0831632519  
Ag,3.9548562609,-0.8285108359,-0.6511826497  
C,-0.3132542823,1.77721392,-2.5249708453  
O,0.6034434754,2.3932154464,-3.0509965618

O,-1.6197390364,2.0918064226,-2.6939675471  
C,-1.9187108292,3.2102971291,-3.5682710231  
O,1.410873857,0.7399905981,0.6363803141  
Si,-0.4862847243,2.707676721,0.9295448662  
C,-0.2697573014,2.9737048181,2.8302282377  
C,-2.319829548,2.8662288544,0.4995413696  
C,0.600890876,3.9594384939,0.0226655122  
C,-1.7589716445,4.550711665,-2.8695548182  
C,-0.6113952898,4.4435024057,3.1602234055  
C,1.182080881,2.6890090668,3.2659254822  
C,-1.2131552146,2.053635851,3.6323963933  
C,-0.7526054472,-0.1503024673,0.9067750087  
C,-1.5279413953,-1.0192984482,1.2671216742  
C,-2.4543276455,-2.0166454834,1.6931711324  
C,-2.0326382416,-3.3416145059,1.9311017922  
C,-3.8137345823,-1.6890132541,1.883781136  
C,-2.947571378,-4.3073525306,2.3468431055  
C,-4.7206134544,-2.6617154476,2.2999072751  
C,-4.2928497181,-3.9729149484,2.5328312723  
Cl,6.2997553947,-1.6379369361,-0.0408261236  
C,7.3921983311,-0.4348483745,-0.8932875406  
Cl,6.8783300305,-0.1381080603,-2.5693162317  
H,-1.0064460855,-0.0628221501,-1.6231134448  
H,-1.277242391,3.1466507584,-4.4519211767  
H,-2.9555430153,3.0394368824,-3.8680072764  
H,-2.4985566443,2.6263838074,-0.5519749918  
H,-2.9167443525,2.1739900514,1.1050041827  
H,-2.6915236966,3.8813564168,0.6876466542  
H,0.8186727657,3.6480557294,-1.0022839135  
H,0.1196721246,4.9441902017,-0.0131653905  
H,1.5595063523,4.0747487583,0.5417545455  
H,-2.0583451309,5.3529413111,-3.5548526727  
H,-2.3902264331,4.6067410102,-1.9771452461  
H,-0.7187934801,4.7152573252,-2.577838261  
H,-0.507950766,4.6262859517,4.2409482454  
H,0.0563761601,5.1468741266,2.6465878881  
H,-1.6432607859,4.6988921037,2.8857936662  
H,1.4739946173,1.6559379584,3.0471830563  
H,1.9004995809,3.3489557783,2.7632935456  
H,1.2931900414,2.852134531,4.3491862646  
H,-2.2686365788,2.2375000879,3.3970623075  
H,-1.009609183,0.9932883382,3.4437490349  
H,-1.0859659776,2.2271277695,4.7122750005  
H,-0.9876355254,-3.6006735893,1.7870100915  
H,-4.1445755455,-0.6703611825,1.7033685195

H,-2.6095714333,-5.3246218355,2.5260098211  
H,-5.7646405141,-2.3957540995,2.442953218  
H,-5.0028563312,-4.7287454145,2.857416907  
H,8.3861003837,-0.8791601341,-0.8843191418  
H,7.3388054371,0.4918682018,-0.3252744764  
---end---  
**TS2-S-c-Et-TBS-CC**  
Electronic\_Energy=-2454.40778761  
Sum of electronic and thermal Free Energies = -  
2454.037678  
Charge=0            Multiplicity=1  
---Coordinates start---  
C,0.2538313052,0.9076628806,0.3252124504  
C,-0.302952626,0.896810217,-1.6449423274  
N,0.8828982909,0.3761025499,-2.1451849135  
C,1.9431521296,0.0130361442,-1.744745649  
Ag,3.8393981403,-0.6365831198,-1.2995493314  
C,-0.5976223833,2.2820783171,-2.0789165288  
O,0.2001297319,3.0697282392,-2.5593830805  
O,-1.8786831175,2.5875903046,-1.7814426598  
C,-2.2672108516,3.9748243559,-1.923213758  
O,1.4570565201,0.3905345529,0.3413674045  
Si,-1.1038844525,-0.2202028827,1.0863495162  
C,-0.6987147355,-0.501476868,2.947083948  
C,-1.0154710403,-1.8772936194,0.1754397277  
C,-2.8101364092,0.5759595346,0.8990043877  
C,-3.5690670503,4.1559707276,-1.1690267437  
C,-1.8412049536,-1.307787435,3.6008562366  
C,-0.5559345094,0.8453438988,3.6847050811  
C,0.6211778446,-1.2887218378,3.0848765099  
C,0.1496622563,2.3331080505,0.6302402175  
C,0.013051259,3.5084561747,0.9169742233  
C,-0.1675082734,4.8932228934,1.2142729383  
C,-0.8402674578,5.2969773902,2.3857204972  
C,0.3082237945,5.8798706409,0.3250819923  
C,-1.0300555423,6.6512959637,2.6567623582  
C,0.1135020689,7.231607121,0.6046101565  
C,-0.5547842567,7.6224434154,1.7695987511  
Cl,6.1265388593,-1.4173973273,-0.4849067235  
C,5.8819402185,-1.4912247379,1.3351340016  
Cl,4.4502601405,-2.4448938978,1.7775588062  
H,-1.1441826155,0.217678015,-1.7589813741  
H,-1.4751067254,4.6102672815,-1.5190264294  
H,-2.376298528,4.2004702037,-2.9903688183  
H,-1.4708341011,-2.6832916837,0.7637727855

H,-1.5320597273,-1.844831766,-0.7914206104  
H,0.0318338212,-2.1440795524,-0.0097430041  
H,-2.9775396405,0.9033653596,-0.1331253027  
H,-3.6099845461,-0.1248194356,1.1694318359  
H,-2.908392946,1.4606242834,1.5399409385  
H,-3.9090963844,5.1933933555,-1.2646733964  
H,-4.349529422,3.4970571974,-1.5655172163  
H,-3.4305734742,3.9329809806,-0.1057729583  
H,-1.6122923255,-1.5065474814,4.6593387106  
H,-2.7950186147,-0.7657361111,3.5708317577  
H,-1.9934672383,-2.2804424416,3.1150719125  
H,0.2737862093,1.441790133,3.2887884564  
H,-1.4667092355,1.4534431288,3.611203317  
H,-0.3613437531,0.6758243173,4.7550667319  
H,0.5550740611,-2.2806224745,2.6192490126  
H,1.4529949514,-0.7554768516,2.612030265  
H,0.868533292,-1.4412696139,4.1471563281  
H,-1.2094646241,4.5413654941,3.073047006  
H,0.8197189359,5.5699225865,-0.5813227438  
H,-1.5510108027,6.9496136049,3.5627924019  
H,0.4837078673,7.9818781566,-0.0890839976  
H,-0.7051648409,8.677069121,1.9842354003  
H,5.755445809,-0.4643502911,1.67271625  
H,6.779649698,-1.9613171626,1.7328252529  
---end---  
**TS1-C-t-Et-TBS-CC**  
Electronic\_Energy=-2454.40923293  
Sum of electronic and thermal Free Energies = -  
2454.034451  
Charge=0            Multiplicity=1  
---Coordinates start---  
C,0.3511972522,1.3072228995,-0.5965291162  
C,-0.2172673114,1.1417788502,-2.1301116845  
N,0.8542798456,0.5265441784,-2.8705152122  
C,2.0010769849,0.420505202,-2.5176460904  
Ag,3.5123970573,-0.1115729454,-1.1012867978  
C,-0.5612546597,2.4921984407,-2.7472000583  
O,0.2292142827,3.2303948543,-3.2974180389  
O,-1.8552389729,2.7752307482,-2.5375213298  
C,-2.2782945574,4.1287374245,-2.8519212716  
O,1.7333867432,1.387912485,-0.6386659895  
Si,-0.1633099089,-0.2338414247,0.4952984374  
C,0.9564444807,-0.2041655693,2.0170755866  
C,0.2006070646,-1.8076988365,-0.4966934868  
C,-2.0184315668,-0.2302401741,1.0395742372

H,-1.1013389512,0.5056021301,-2.1610100993  
H,-1.5946782949,4.827896808,-2.3611455196  
H,-2.2011794971,4.2746775115,-3.9344139068  
H,0.656311379,-0.9683606062,2.7454513852  
H,1.9955564337,-0.4045090944,1.7289197639  
H,0.9286031521,0.7704321811,2.5181093083  
H,0.042192626,-2.6912870864,0.1341320496  
H,-0.439357802,-1.9099402123,-1.3816277556  
H,1.2429055423,-1.832068134,-0.8367465106  
C,-3.7002560424,4.2832770413,-2.3544474473  
H,-3.7472272334,4.1537000517,-1.2681521528  
H,-4.0648144948,5.2876926906,-2.5972784491  
H,-4.3631182003,3.5500987476,-2.8268781211  
C,-2.2256545748,0.696445413,2.2569763528  
H,-1.950127596,1.7328915893,2.0394646693  
H,-3.284327728,0.6907609091,2.5594099464  
H,-1.6381917066,0.3689885541,3.1234182065  
C,-2.9459971217,0.2305666092,-0.1042965003  
H,-2.722322745,1.2509835127,-0.4345222647  
H,-2.8769266793,-0.4278755192,-0.9803744196  
H,-3.995598349,0.2130182677,0.227425167  
C,-2.421017993,-1.6641735372,1.4515892128  
H,-3.4537276379,-1.6716630861,1.8325971153  
H,-2.3800178387,-2.3636202965,0.6080695605  
H,-1.7797828158,-2.0625430452,2.2491132701  
C,-0.2133228186,2.5319706008,-0.0225608541  
C,-0.6680035315,3.5375463398,0.48868232  
C,-1.2672067644,4.6961819805,1.0689895087  
C,-2.6314832949,4.6825950889,1.4303404709  
C,-0.5180870427,5.8719796562,1.278104358  
C,-3.2246503213,5.8164984698,1.9832093252  
H,-3.2130258512,3.7790467409,1.2742819425  
C,-1.120194132,7.0002333183,1.8330530774  
H,0.5316633825,5.8891595166,1.0001529253  
C,-2.473179869,6.9782965903,2.1867480547  
H,-4.276396831,5.7927218794,2.2560387191  
H,-0.5313952443,7.9003652085,1.9887990949  
H,-2.9385944516,7.8604951081,2.6179211555  
Cl,5.4642476386,-1.0434922797,0.2930714102  
C,6.3389947183,-2.1522084925,-0.8719653387  
H,6.9471787823,-2.8161727615,-0.26005738  
H,6.9351949068,-1.5165309053,-1.523510686  
Cl,5.2065825883,-3.1109267214,-1.8546488494  
---end---

**TS2-S-t-Et-TBS-CC**

Electronic\_Energy=-2454.41342899  
Sum of electronic and thermal Free Energies = -  
2454.035388  
Charge=0 Multiplicity=1  
---Coordinates start---  
C,0.1233203254,1.2356503016,-0.9508343645  
C,-0.2362999911,1.2418535987,-2.4925910452  
N,0.946454335,0.6530871583,-3.1391019722  
C,2.0429661251,0.6736786502,-2.6241213874  
Ag,3.4271055967,0.1524617591,-1.1076833299  
C,-0.4297805841,2.6325213736,-3.1059334195  
O,0.4605420847,3.3538987514,-3.5013368076  
O,-1.7340969971,2.944494313,-3.158187706  
C,-2.072522592,4.2402098846,-3.7249905555  
O,1.4481971233,1.6234612651,-0.8276816746  
Si,-0.8580335659,2.4090338017,0.2701351234  
C,-2.6934132112,1.8651433202,0.5645351321  
C,-0.7551149706,4.1993508036,-0.3331796573  
C,0.0992217484,2.2898652979,1.8951196969  
H,-1.1197059659,0.6386318172,-2.7026948362  
H,-1.4535148445,5.0069528418,-3.2515972606  
H,-1.8300396362,4.2164794806,-4.792702083  
H,-0.8031027975,4.8770558732,0.5285046715  
H,0.1965030489,4.377296567,-0.8454145216  
H,-1.5683320083,4.4697119047,-1.0113345604  
H,1.0902559804,2.7404501003,1.7729236704  
H,-0.4217633229,2.8228903948,2.7009059912  
H,0.2378217534,1.2497428029,2.2116643992  
C,-3.5497579352,4.4652581379,-3.4795758182  
H,-3.7685225521,4.4917883624,-2.4064704233  
H,-3.8509512605,5.423292797,-3.9177298946  
H,-4.1486512414,3.6710600063,-3.9381104788  
C,-2.7772058582,0.8162632743,1.6952953065  
H,-2.2192858792,-0.0937687927,1.4501642571  
H,-2.3914613886,1.2016507541,2.6466690109  
H,-3.8260659464,0.5259213152,1.861349626  
C,-3.3276313293,1.2632171575,-0.7053034033  
H,-3.2891696068,1.9518238285,-1.5549426317  
H,-2.8234432312,0.3354540073,-1.0023804346  
H,-4.3845517155,1.0161878887,-0.5212554964  
C,-3.5102960704,3.1054031881,0.9912552204  
H,-4.5442096245,2.8141673357,1.2314371284  
H,-3.0948939433,3.5896311675,1.8851440877  
H,-3.5600703093,3.8594949094,0.1967719057  
C,-0.071207402,-0.1464864636,-0.4559335723

C,-0.1219583658,-1.2629120591,0.025714476  
C,-0.1836945695,-2.5627435411,0.614196896  
C,-0.4576430957,-2.7100415386,1.9895243087  
C,0.0500813377,-3.7159682286,-0.1633401611  
C,-0.4932600619,-3.9779731614,2.5675940995  
H,-0.6383931816,-1.8250919664,2.5925660529  
C,0.0147798898,-4.9800954569,0.4245887005  
H,0.2606105997,-3.6079261592,-1.2234511955  
C,-0.2558513861,-5.1158312568,1.7898296487

H,-0.705006995,-4.078163794,3.6288411567  
H,0.2000410992,-5.8606127474,-0.1847262152  
H,-0.2818923551,-6.1022322333,2.244823941  
Cl,5.2460830193,-0.8296535703,0.464523803  
C,5.0430802746,-2.634139887,0.2224304487  
H,5.5258972324,-3.107176675,1.0758845126  
H,5.5264310521,-2.8784620312,-0.7215288802  
Cl,3.3296000258,-3.1094480987,0.1594820049  
---end---



## 9. References

- [1] (a) Xu Y.; Yi H.; Oestreich M. *Organometallics*, **2021**, *40*, 2194–2197; (b) Nagy A.; Collard L.; Indukuri K.; Leyssens T.; Riant O. *Chem. Eur. J.* **2019**, *25*, 8705–8708; (c) Sasaki M.; Kondo Y.; Kawahata M.; Yamaguchi K.; Takeda K. *Angew. Chem. Int. Ed.* **2011**, *50*, 6375–6378; (d) Sakaguchi K.; Ayabe M.; Watanabe Y.; Okada T.; Kawamura K.; Shiada T.; Ohfuné Y. *Org. Lett.* **2008**, *10*, 5449–5452; (e) Aguchi K.; Fujita M.; Suzuki H.; Higashino M.; Ohfuné Y. *Tetrahedron Lett.* **2000**, *41*, 6589–6592; (f) Okada T.; Oda N.; Suzuki H.; Sakaguchi K.; Ohfuné Y. *Tetrahedron Lett.* **2010**, *51*, 3765–3768.
- [2] (a) Wang P.Y.; Duret G.; Marek I. *Angew. Chem. Int. Ed.* **2019**, *58*, 14995–14999; (b) Fan D.; Liu Y.; Jia J.; Zhang Z.; Liu Y.; Zhang W. *Org. Lett.* **2019**, *21*, 1042–1045; (c) Deng Y.; Liu Q.; Smith III AB. *J. Am. Chem. Soc.* **2017**, *139*, 9487–9490; (d) Matsumoto K.; Shindo M. *Adv. Synth. Catal.* **2012**, *354*, 642–650; (e) Ito K.; Tamashima H.; Iwasawa N.; Kusama H. *J. Am. Chem. Soc.* **2011**, *133*, 3716–3719.
- [3] Suzuki I.; Esumi N.; Yasuda M. *Asian J. Org. Chem.* **2016**, *5*, 179–182; (b) Greszler S.N.; Johnson J.S. *Angew. Chem. Int. Ed.* **2009**, *48*, 3689–3691; (c) Toma T.; Shimokawa J.; Fukuyama T. *Org. Lett.* **2007**, *9*, 3195–3197; (d) Myers A.G.; Zheng B.; Movassaghi M. *J. Org. Chem.* **1997**, *62*, 7507–7507.
- [4] Han M.Y.; Xie X.; Zhou D.; Li P.; Wang L. *Org. Lett.* **2017**, *19*, 2282–2285.
- [5] Davis H.J.; Kavanagh M.E.; Balan T.; Abell C.; Coyne A.G. *Bioorg. Med. Chem. Lett.* **2016**, *26*, 3735–3740.
- [6] Becke A.D. *Phys. Rev. A* **1988**, *38*, 3098–3100.
- [7] Lee C.; Yang W.; Parr R.G. *Phys. Rev. B* **1988**, *37*, 785.
- [8] Becke A.D. *J. Chem. Phys.* **1993**, *98*, 1372–1377.

- [9] Stephens P.J.; Devlin F.J.; Chabalowski C.F.; Frisch M.J. *J. Phys. Chem.* **1994**, *98*, 11623–11627.
- [10] Grimme S.; Antony J.; Ehrlich S.; Krieg H. *J. Chem. Phys.* **2010**, *132*, 154104.
- [11] Frisch M.J.; Trucks G.W.; Schlegel H.B.; Scuseria G.E.; Robb M.A.; Cheeseman J.R.; Scalmani G.; Barone V.; Petersson G.A.; Nakatsuji H.; Li X.; Caricato M.; Marenich A.V.; Bloino J.; Janesko B.G.; Gomperts R.; Mennucci B.; Hratchian H.P.; Ortiz J.V.; Izmaylov A.F.; Sonnenberg J.L.; Williams-Young D.; Ding F.; Lipparini F.; Egidi F.; Goings J.; Peng B.; Petrone A.; Henderson T.; Ranasinghe D.; Zakrzewski V.G.; Gao J.; Rega N.; Zheng G.; Liang W.; Hada M.; Ehara M.; Toyota K.; Fukuda R.; Hasegawa J.; Ishida M.; Nakajima T.; Honda Y.; Kitao O.; Nakai H.; Vreven T.; Throssell K.; Montgomery J.J.A.; Peralta J.E.; Ogliaro F.; Bearpark M.J.; Heyd J.J.; Brothers E.N.; Kudin K.N.; Staroverov V.N.; Keith T.A.; Kobayashi R.; Normand J.; Raghavachari K.; Rendell A.P.; Burant J.C.; Iyengar S.S.; Tomasi J.; Cossi M.; Millam J.M.; Klene M.; Adamo C.; Cammi R.; Ochterski J.W.; Martin R.L.; Morokuma K.; Farkas O.; Foresman J.B.; Fox D.J. *Gaussian 16 Rev. B.01*, Wallingford, CT, **2016**.
- [12] Roush W.R.; Walts A.E.; Hoong L.K. *J. Am. Chem. Soc.* **1985**, *107*, 8186–8190.
- [13] Barczak N.T.; Rooke D.A.; Menard Z.A.; Ferreira E.M. *Angew. Chem. Int. Ed.* **2013**, *52*, 7579–7582.
- [14] Okada T.; Oda N.; Suzuki H.; Sakaguchi K.; Ohfuné Y. *Tetrahedron Lett.* **2010**, *51*, 3765–3768.
- [15] Fan D.; Liu Y.; Jia J.; Zhang Z.; Liu Y.; Zhang W. *Org. Lett.* **2019**, *21*, 1042–1045.

## 10. $^1\text{H}$ and $^{13}\text{C}$ NMR spectra of the products

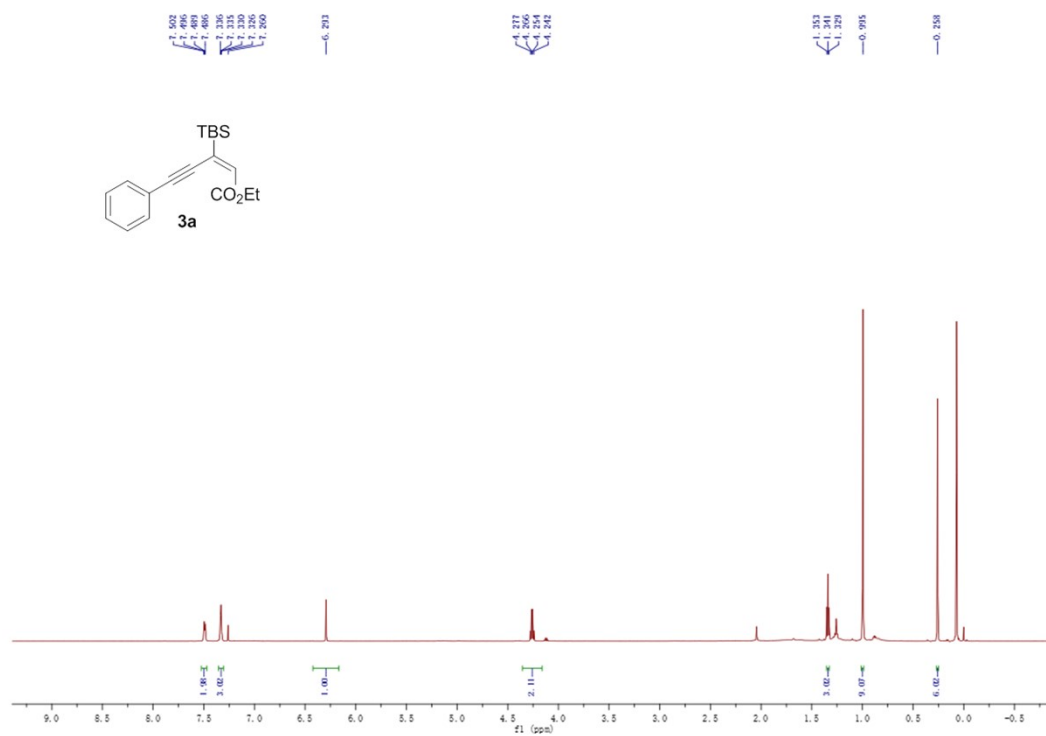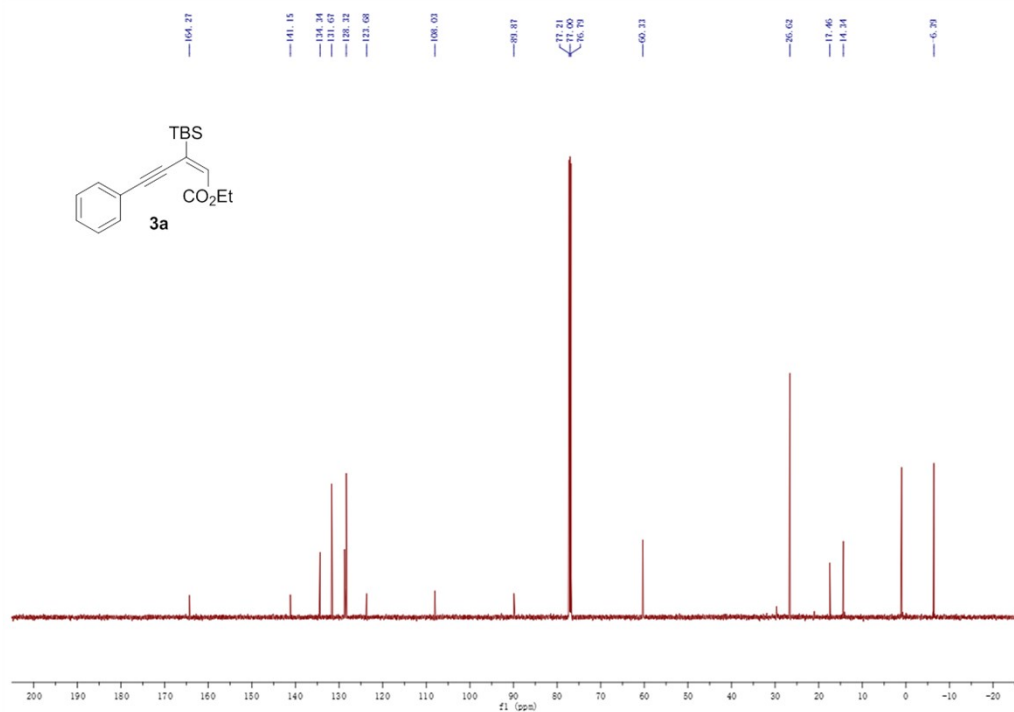

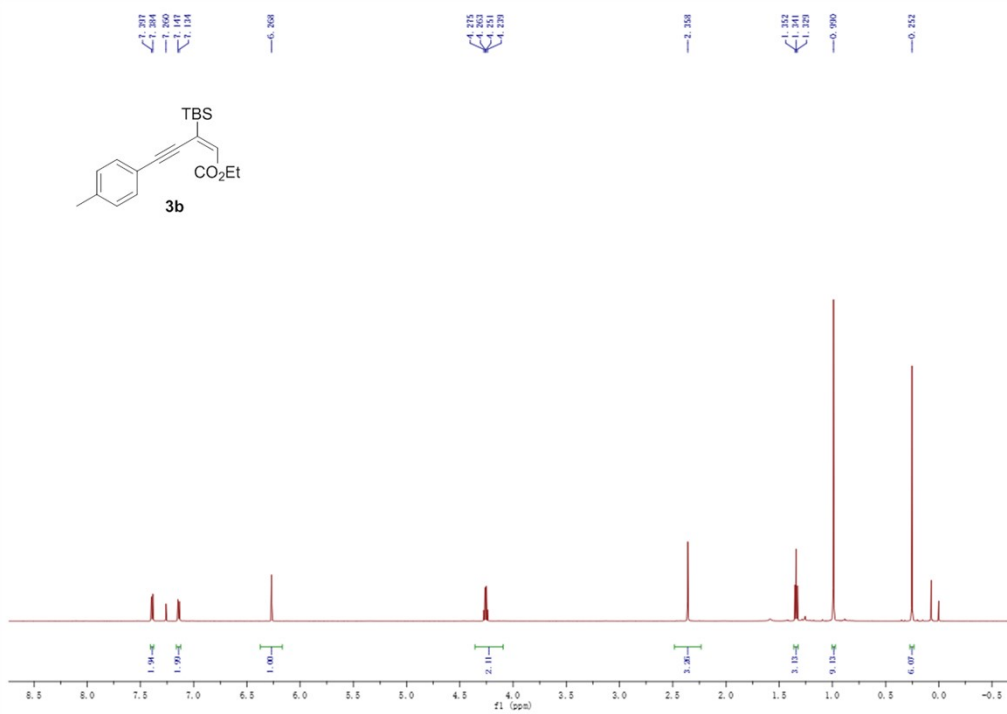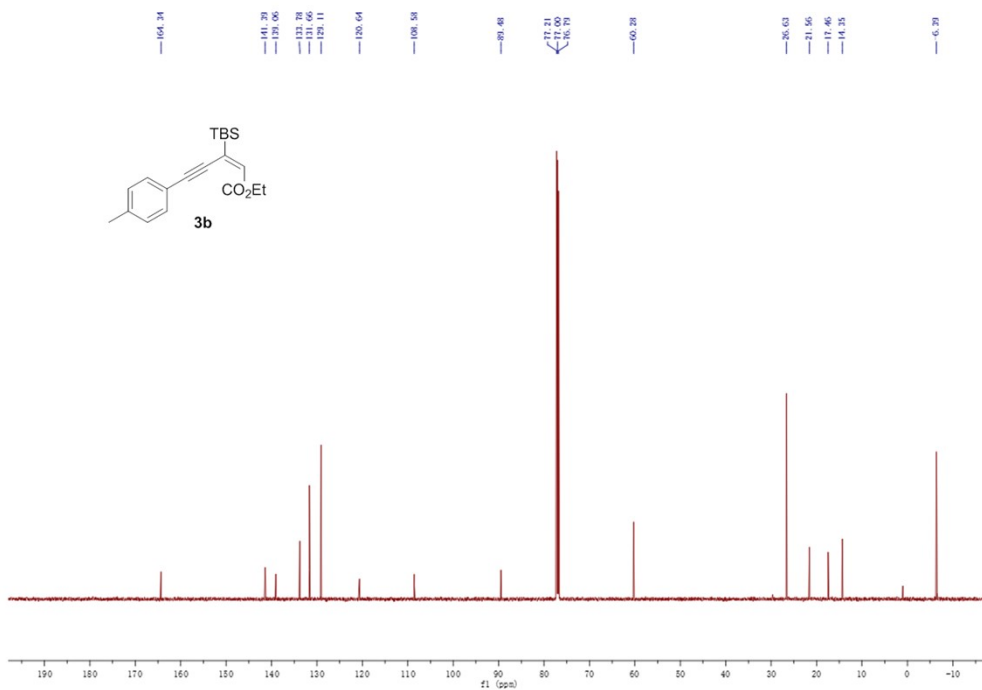

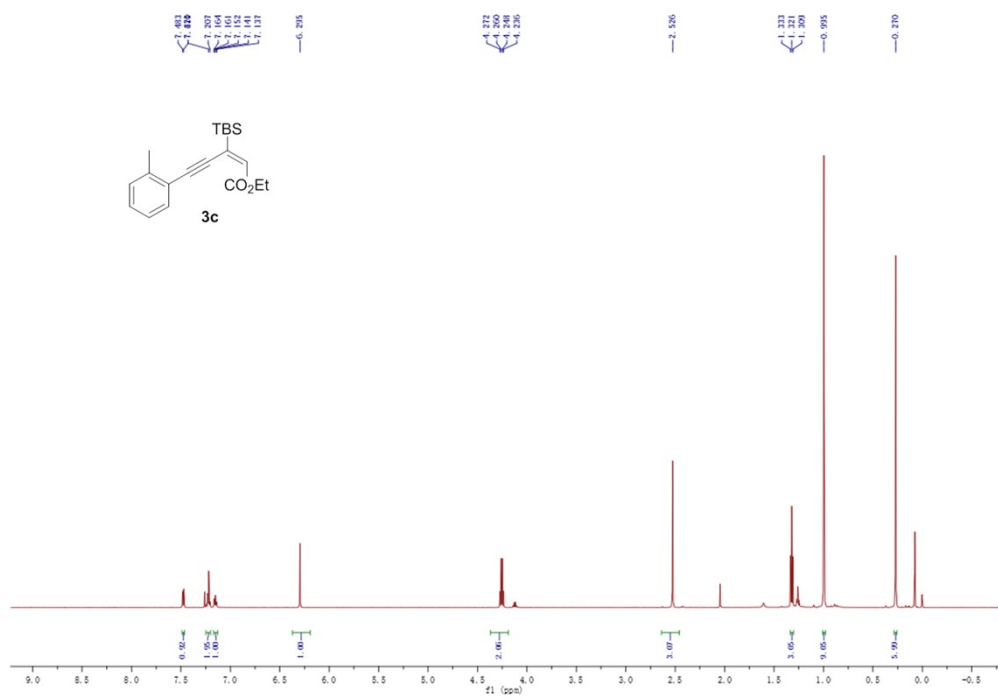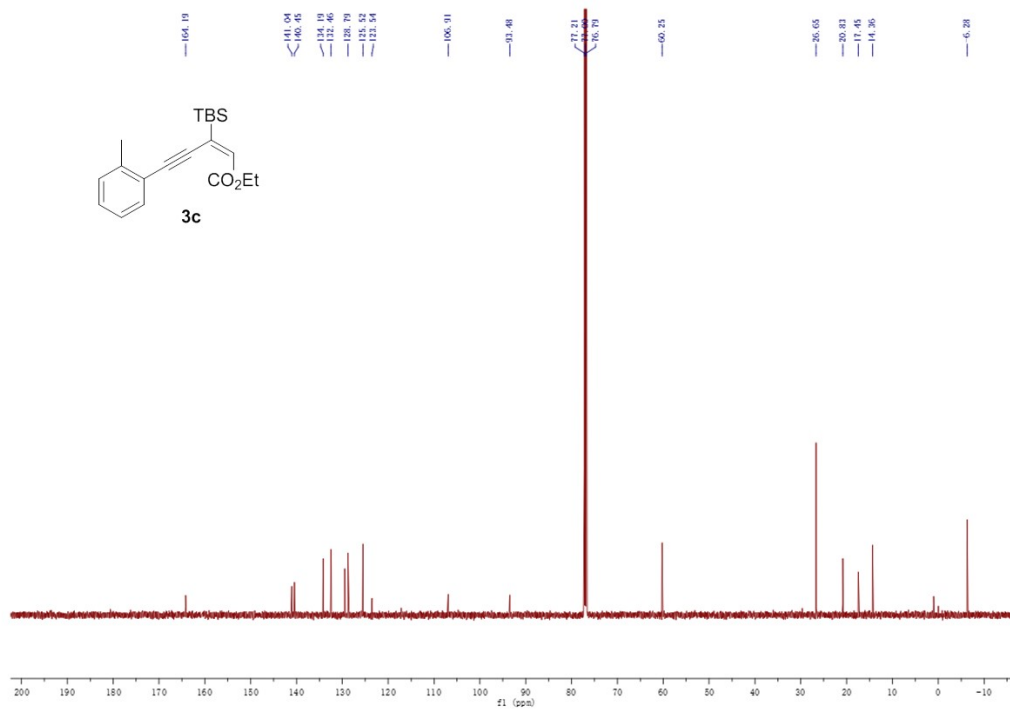

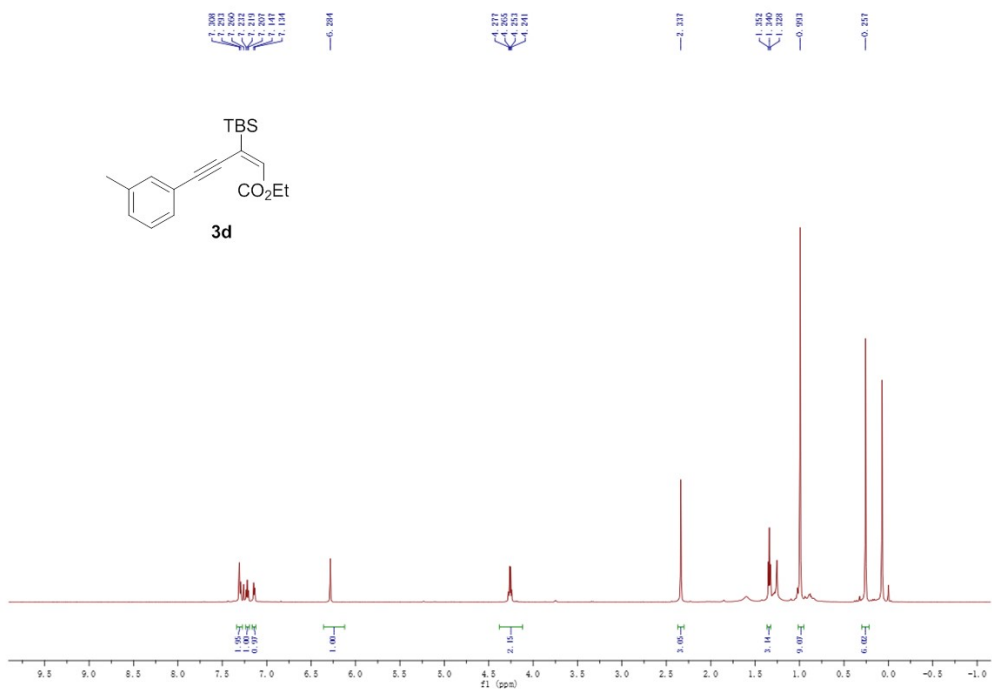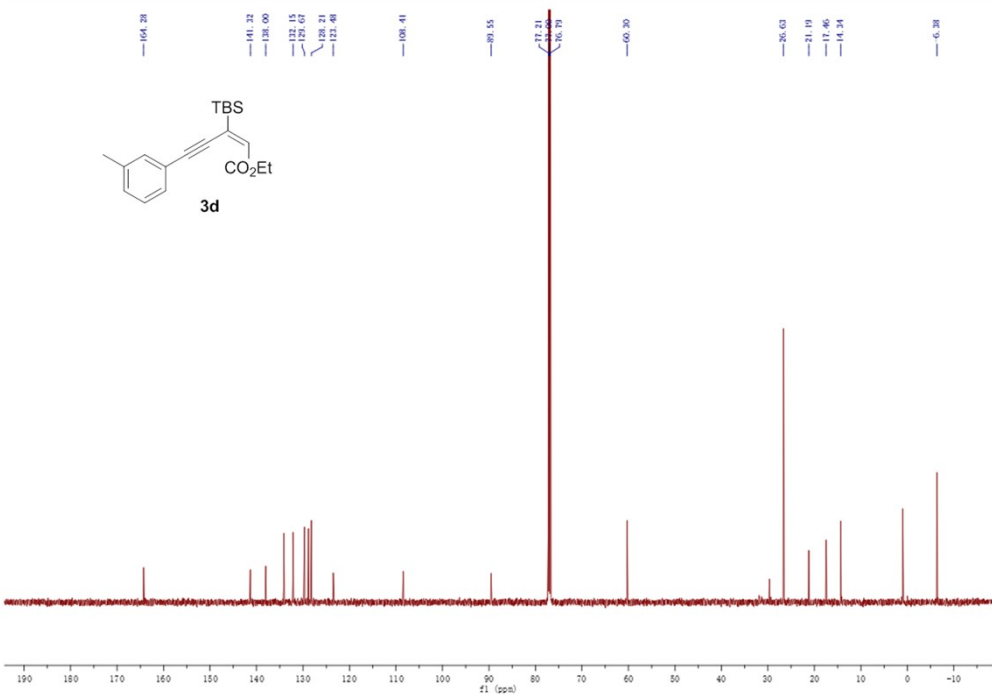

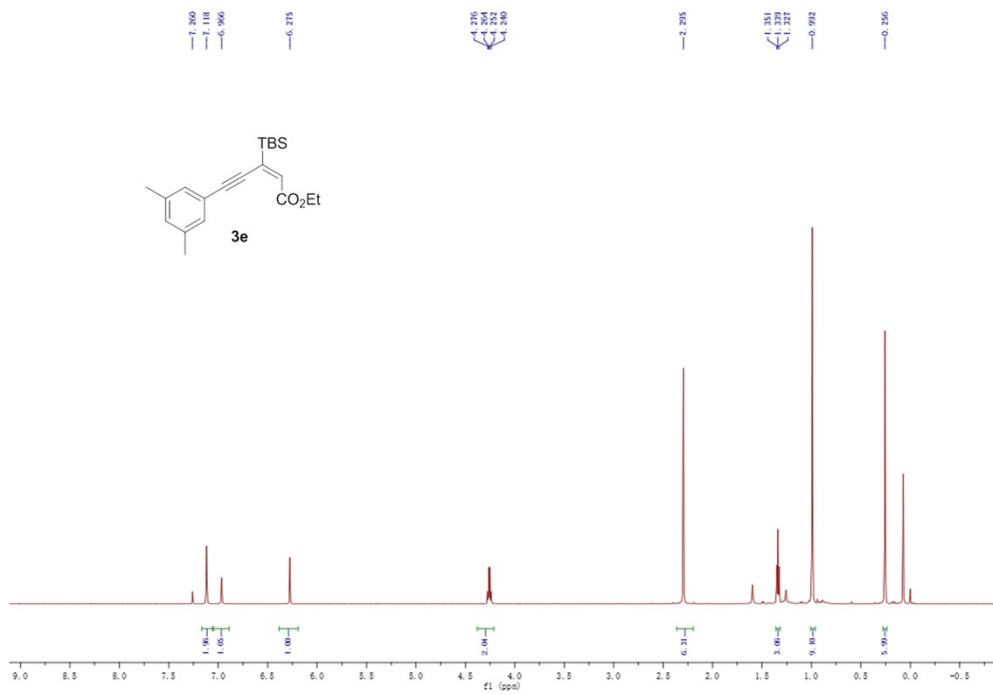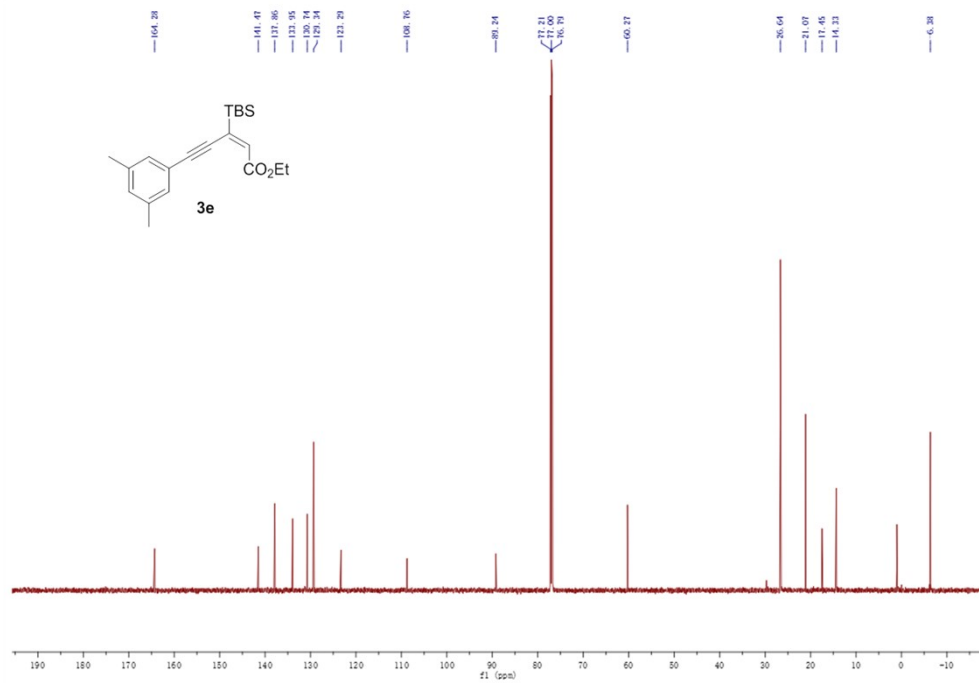

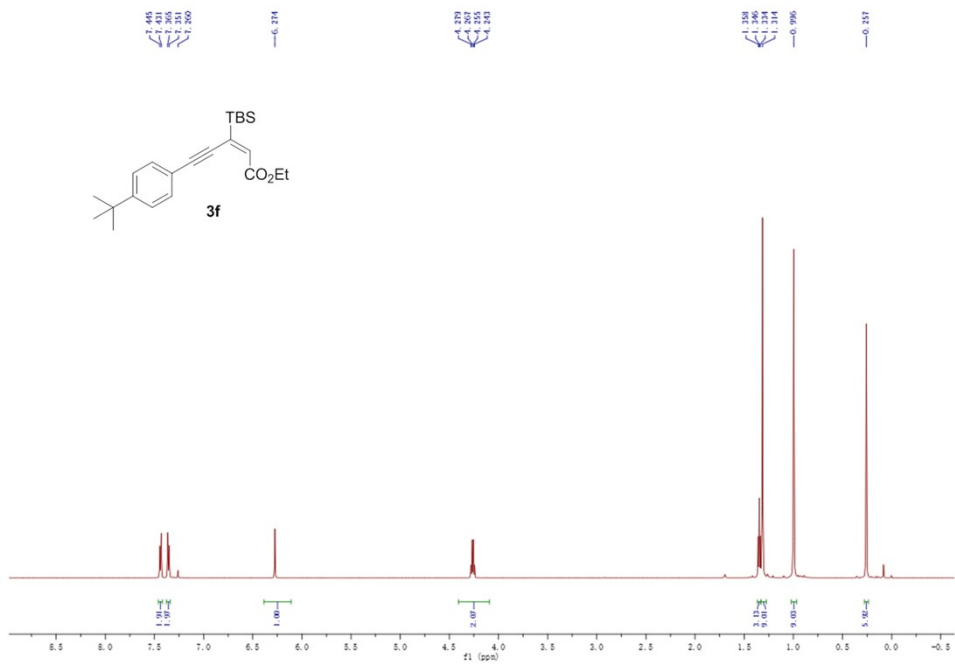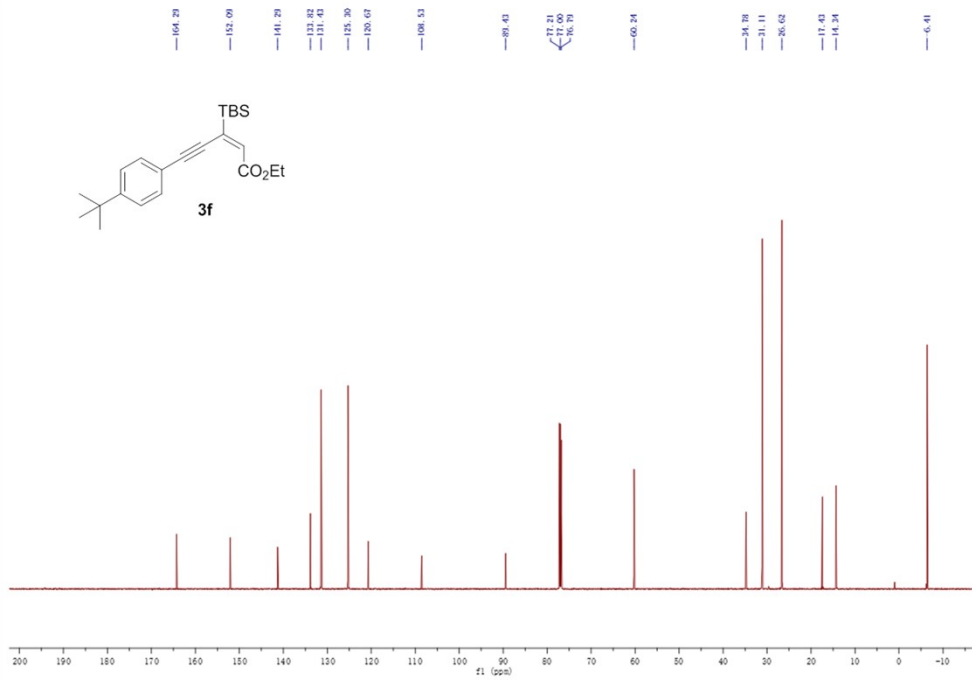



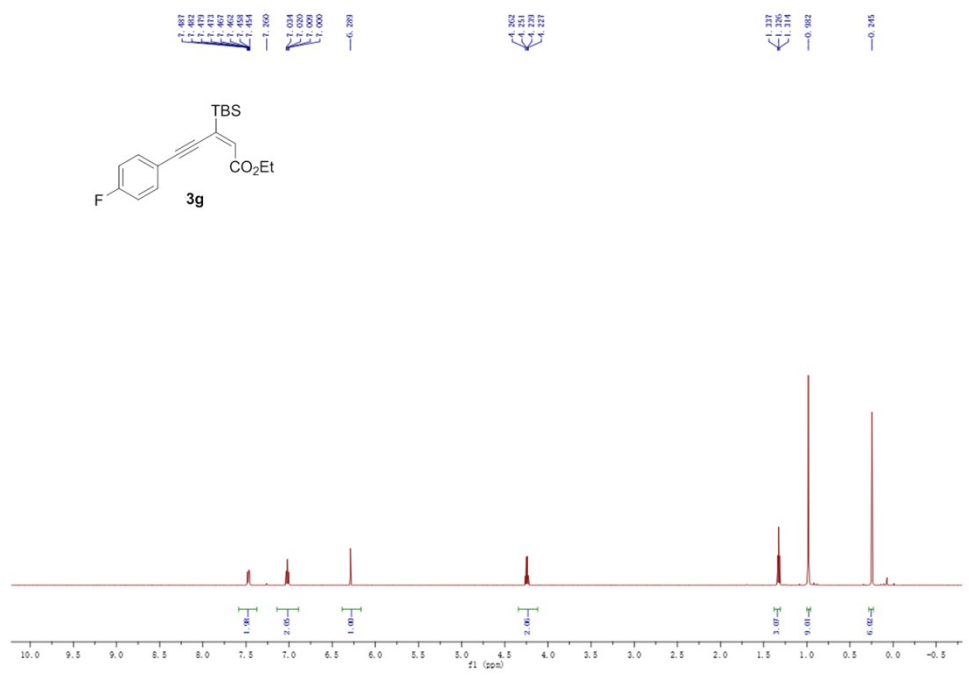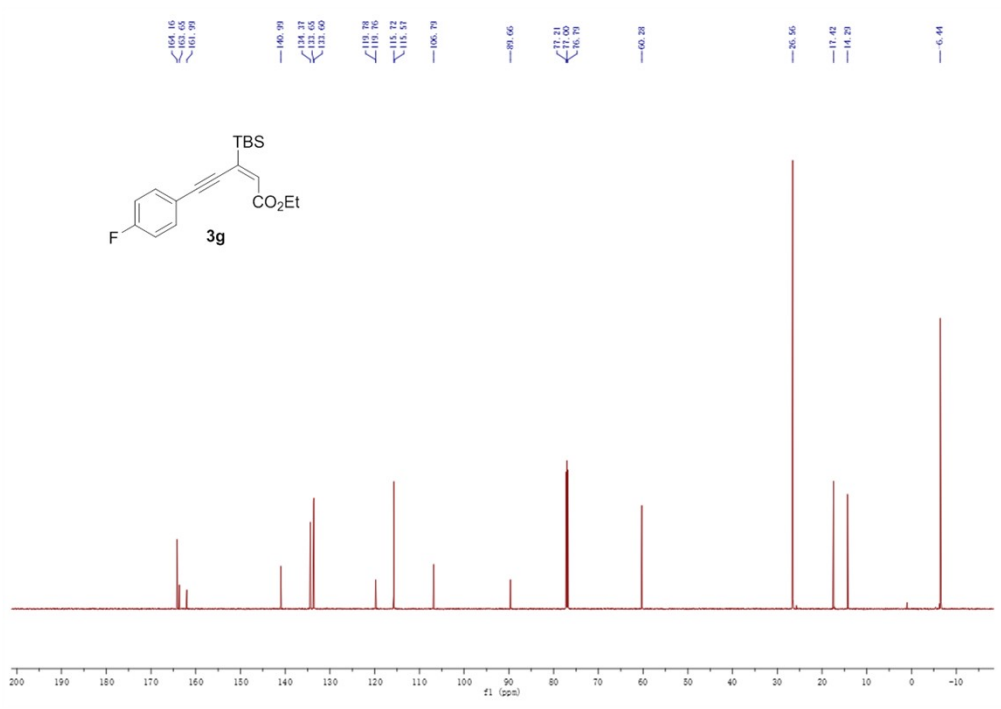

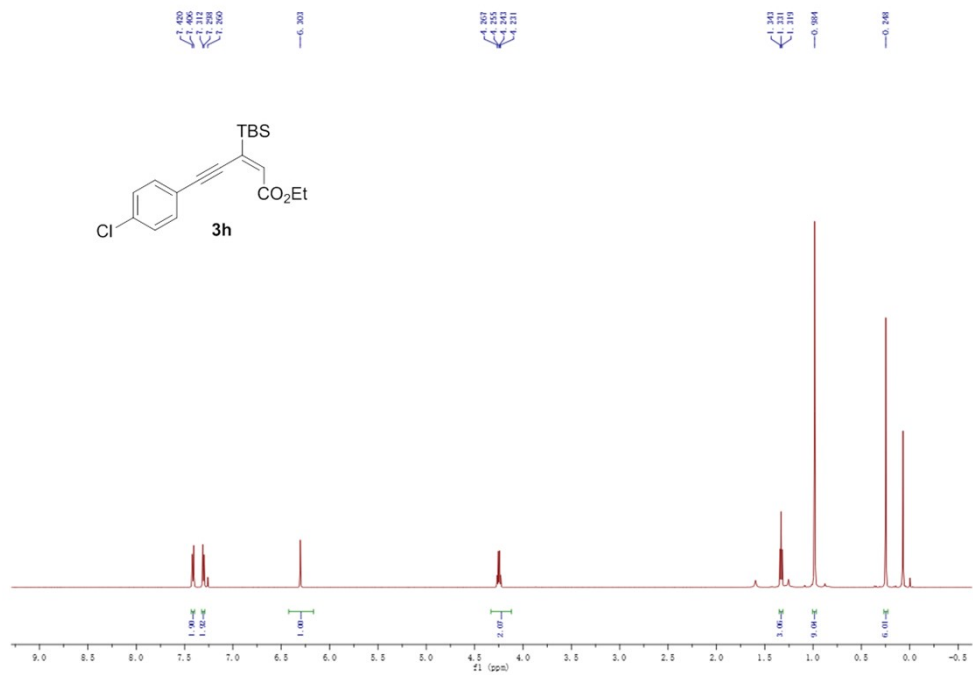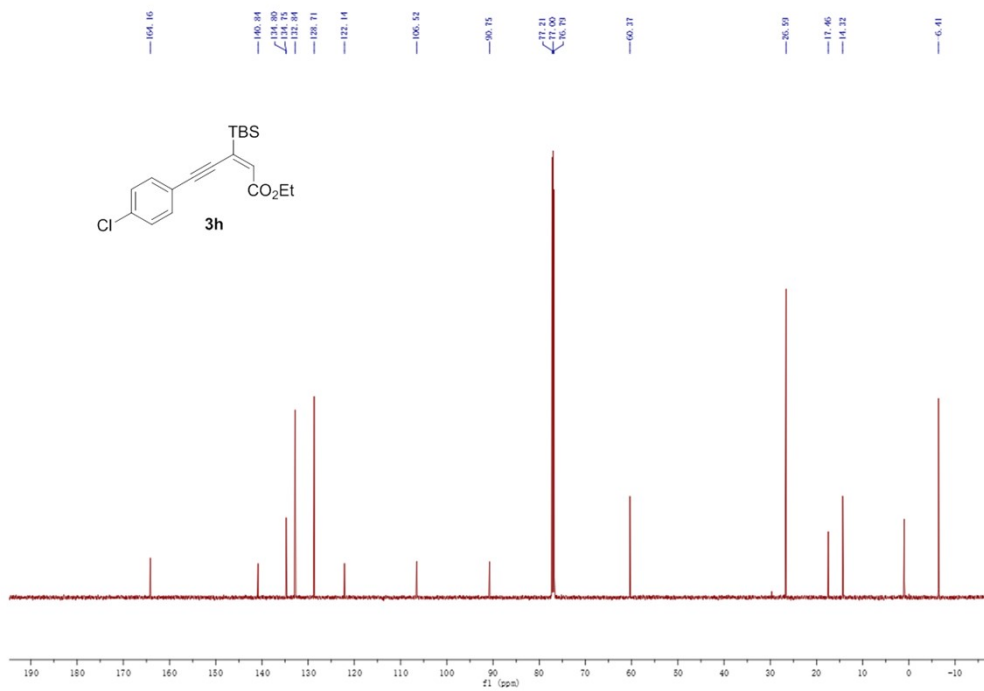

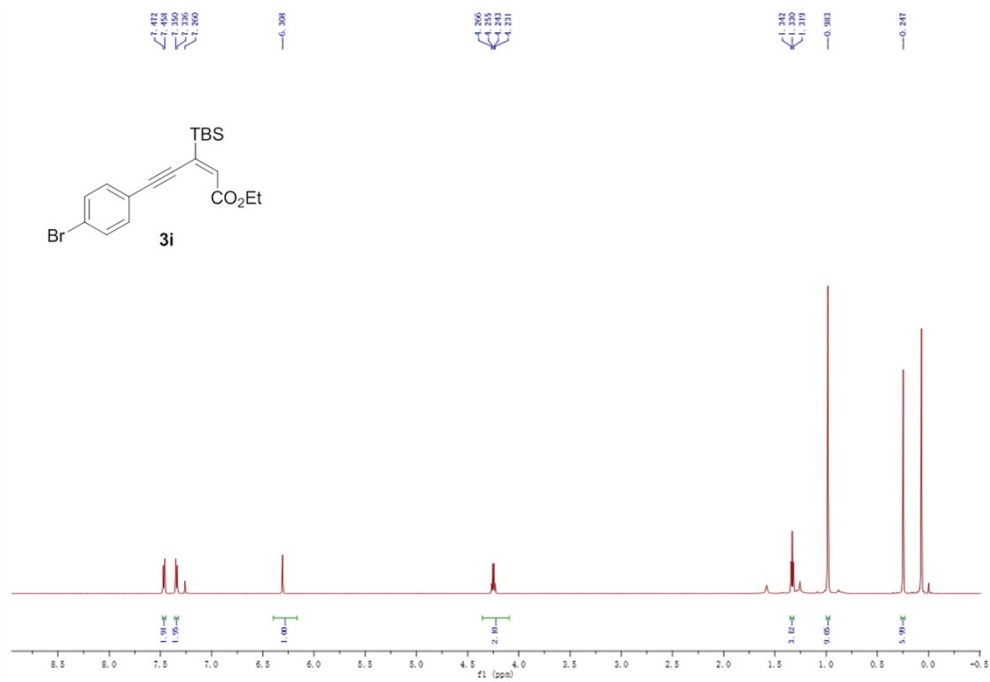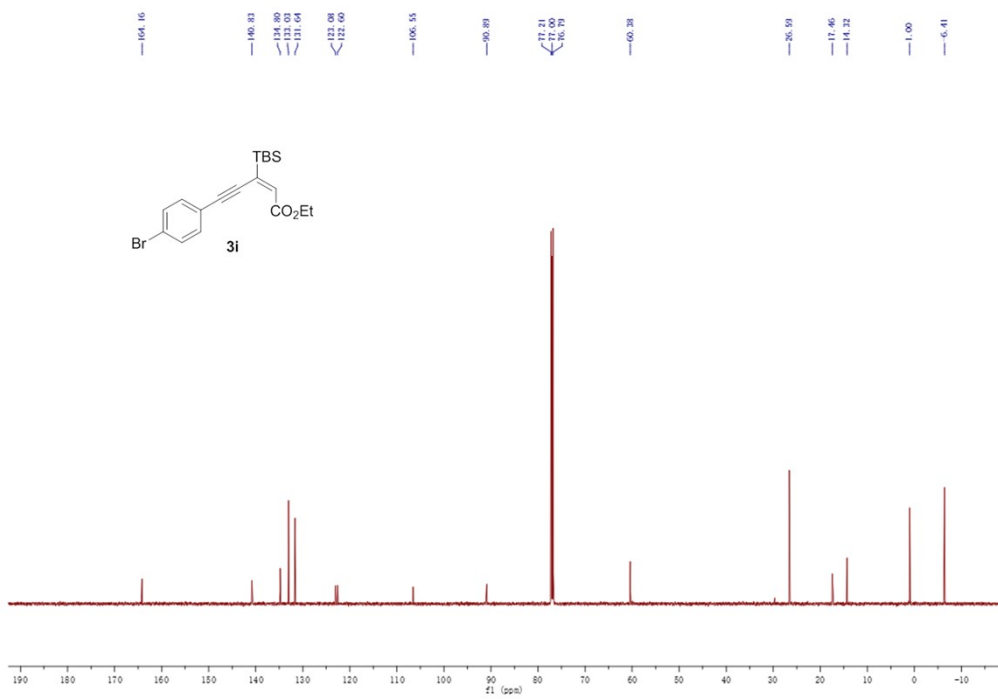

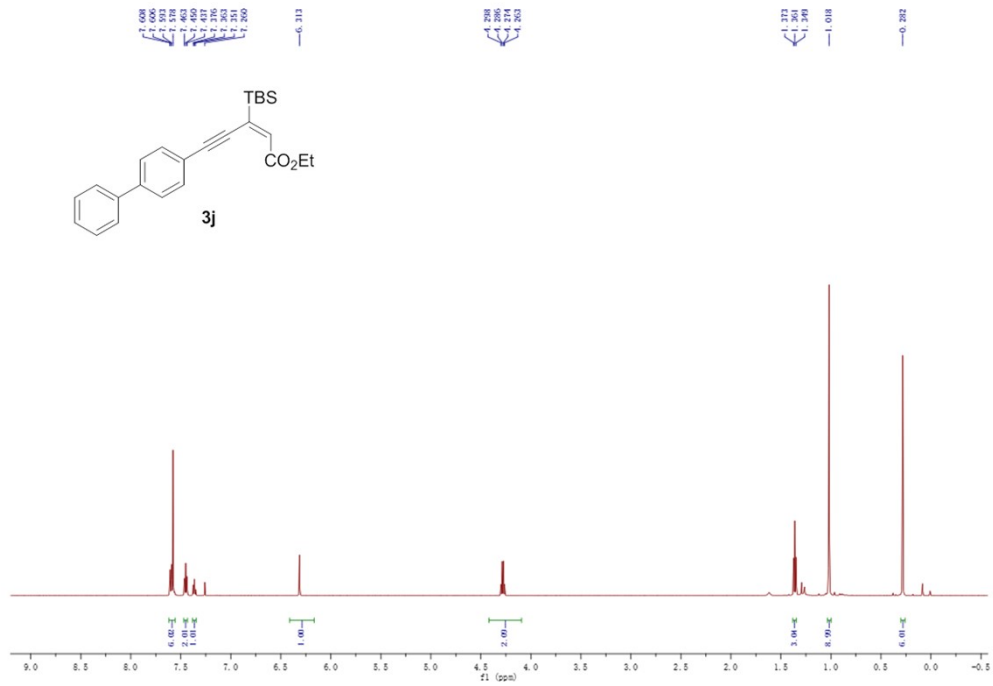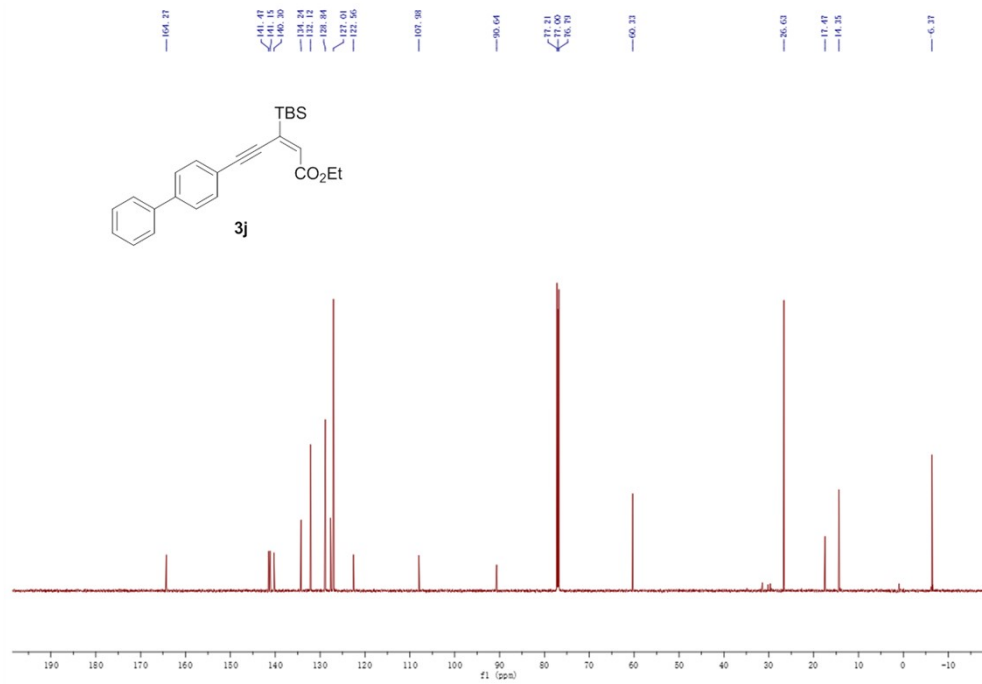

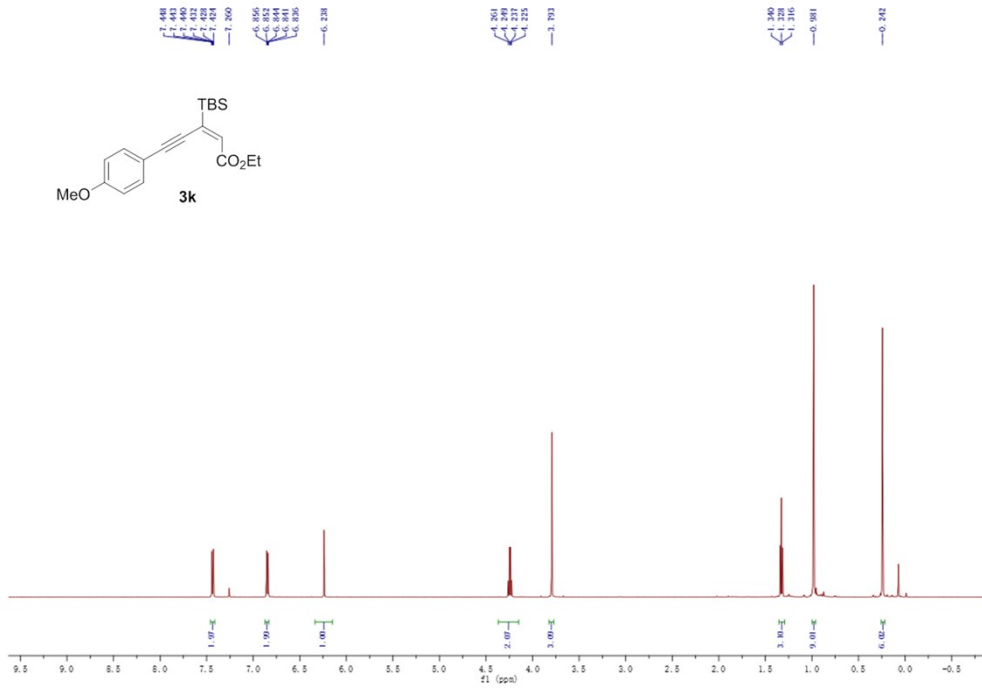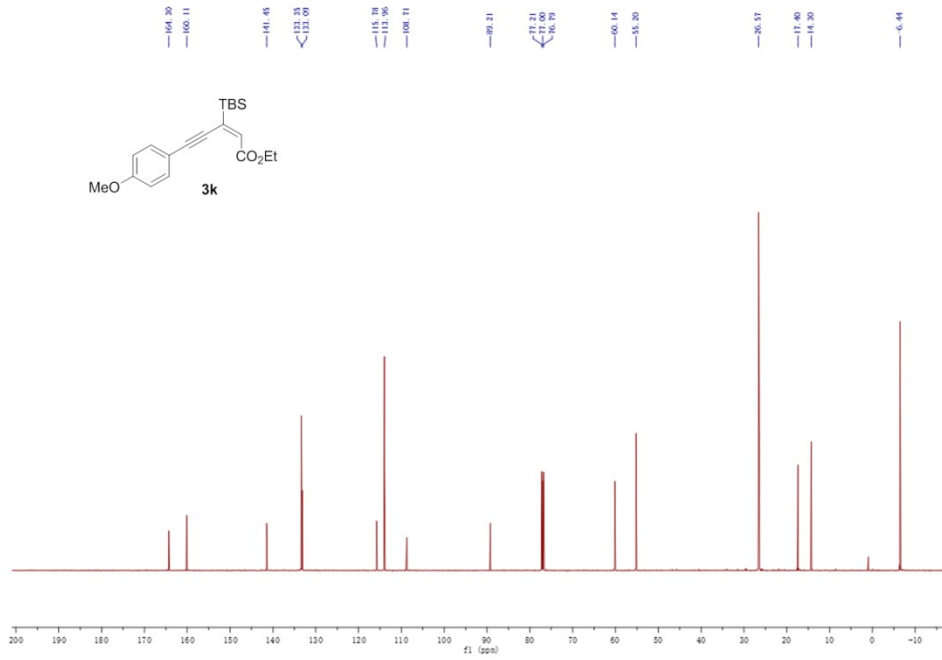

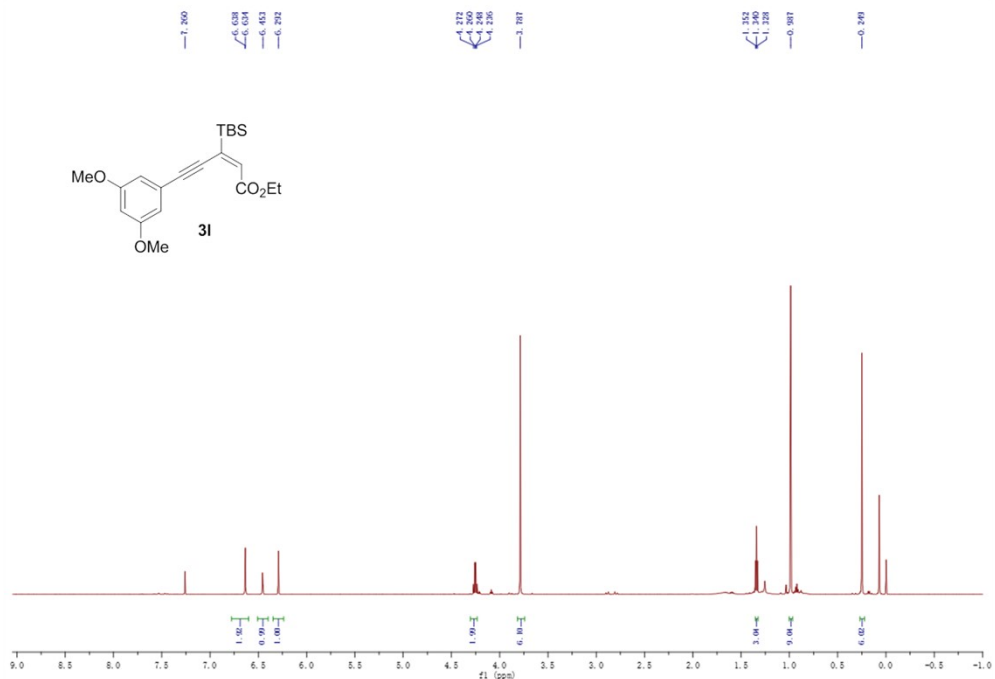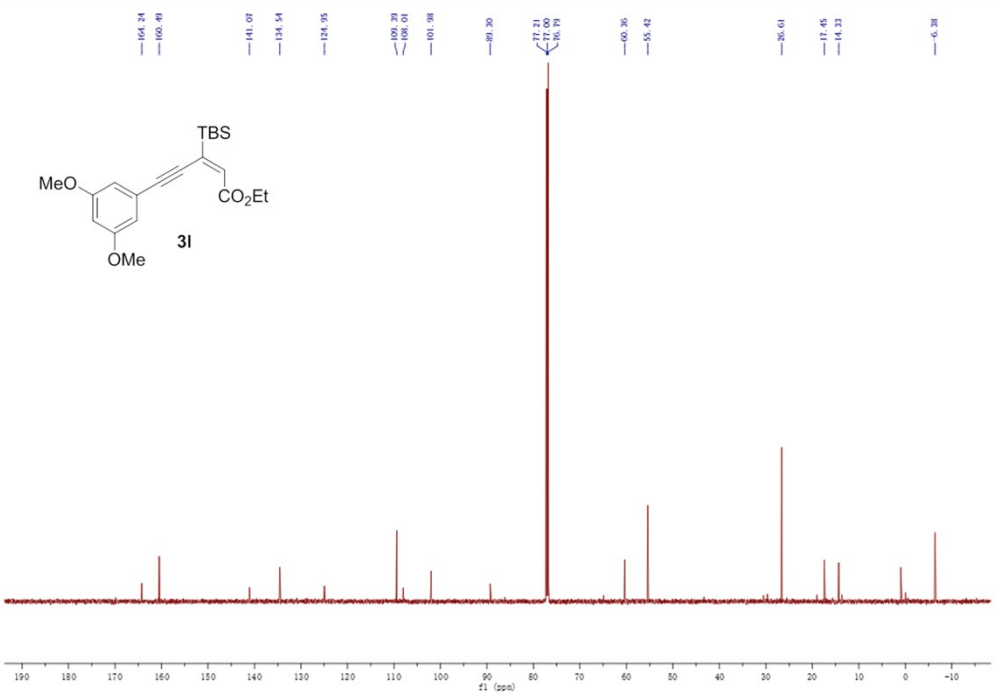

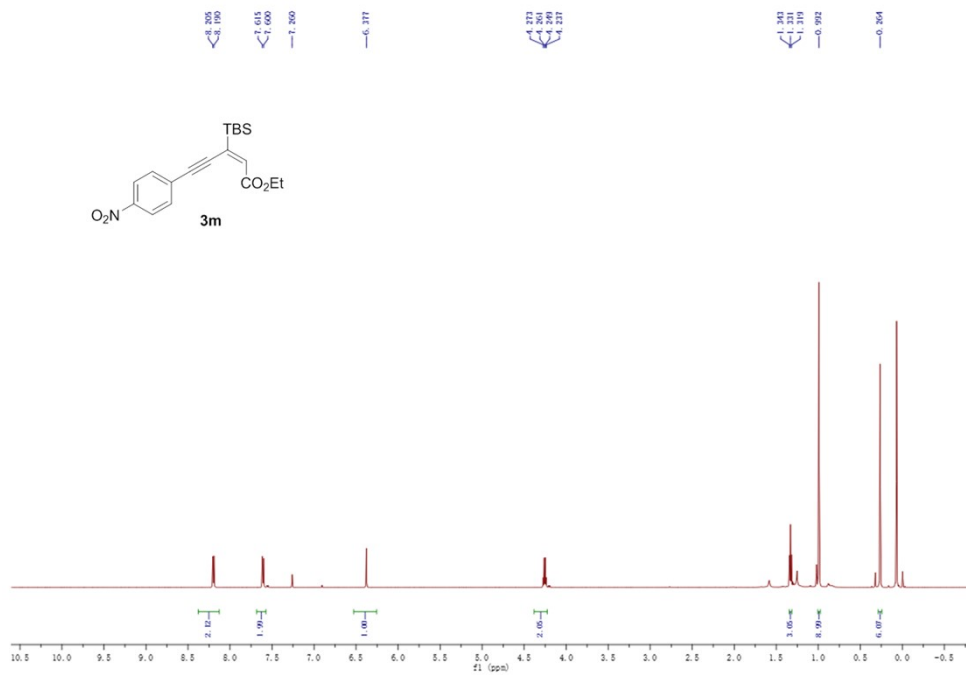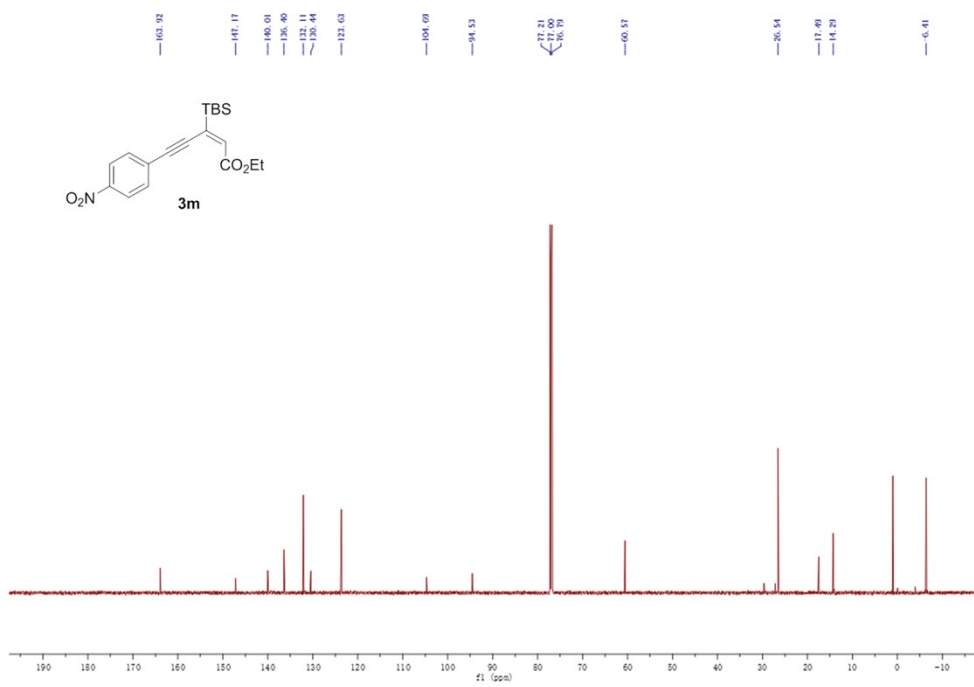

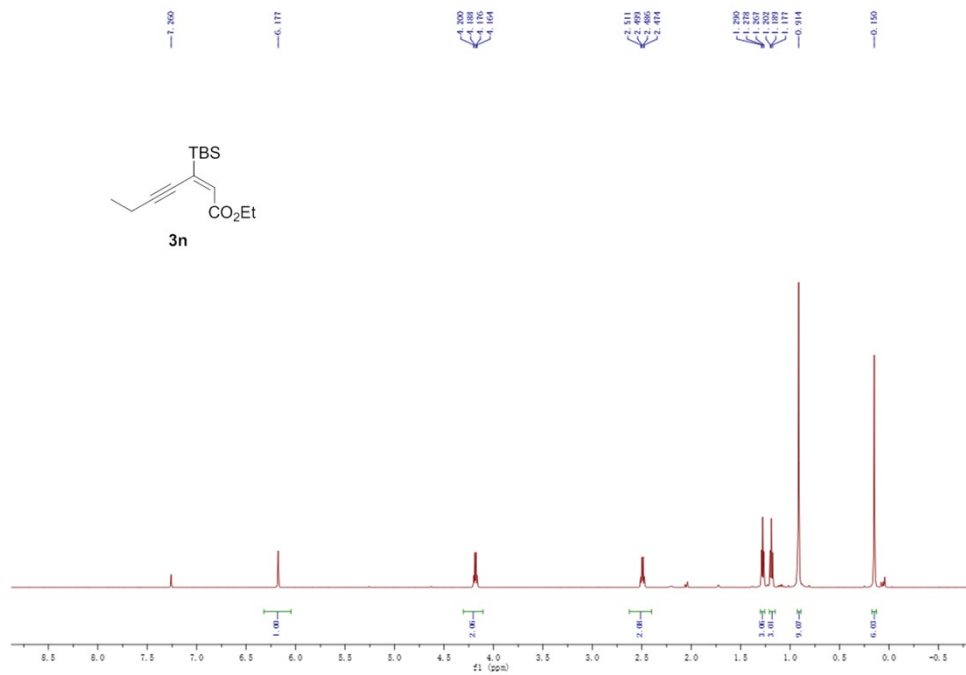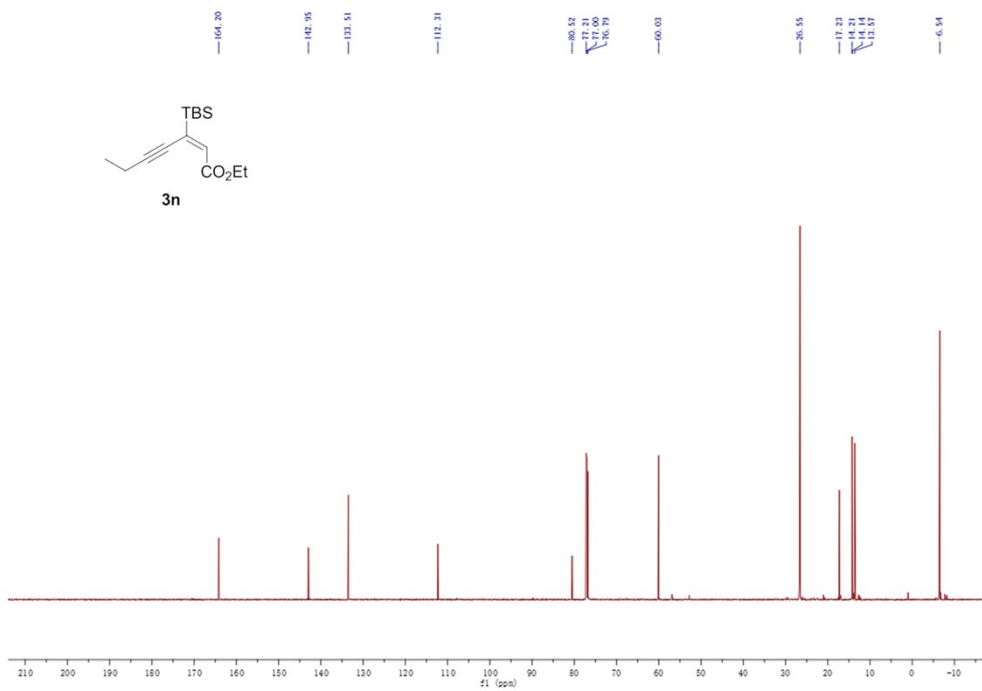



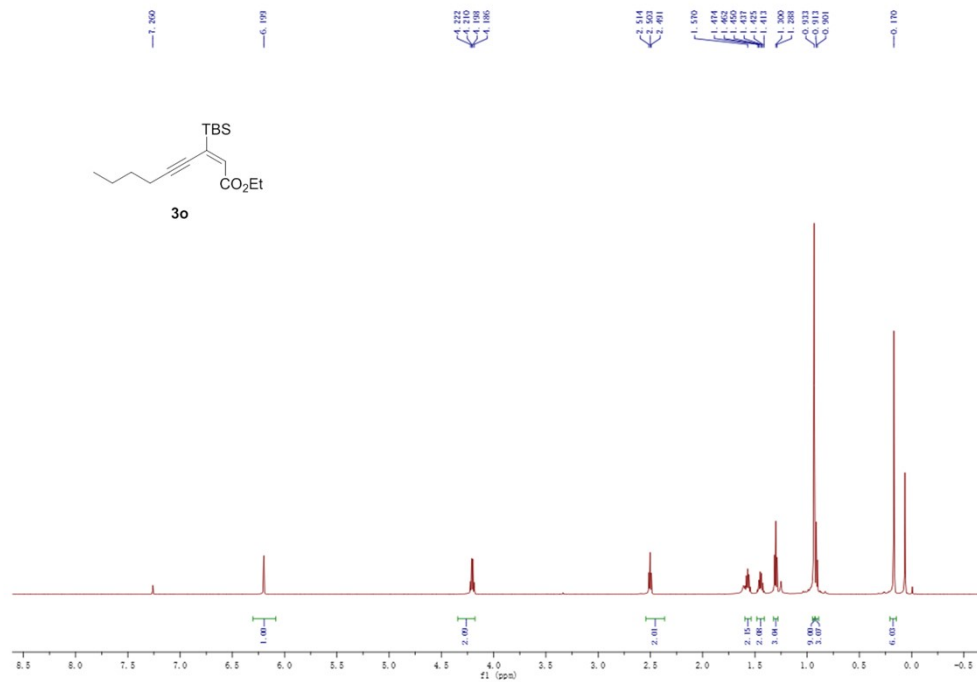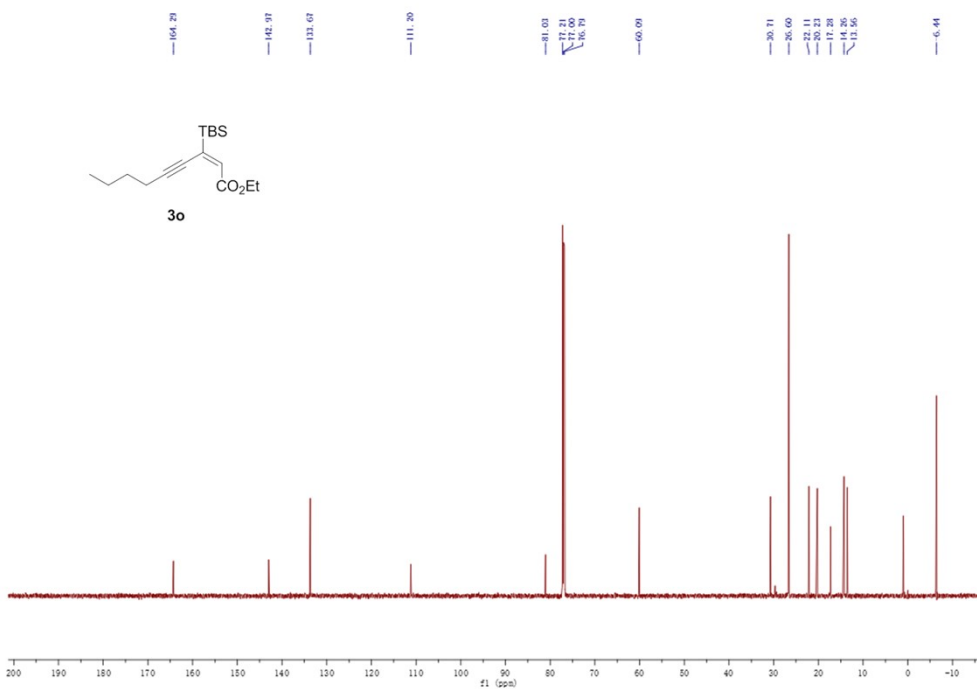

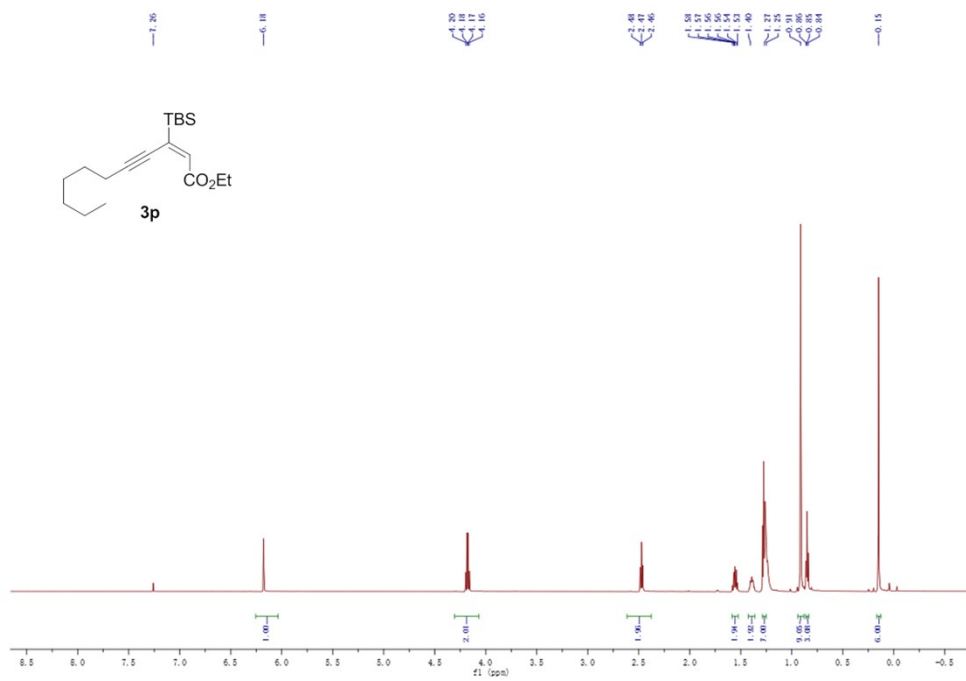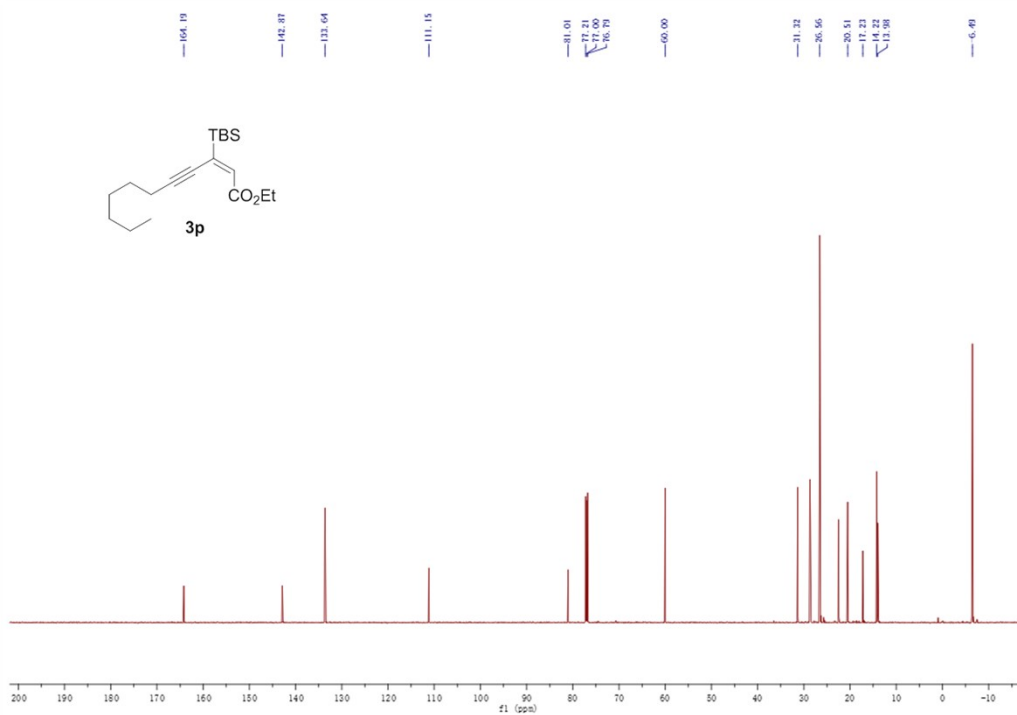

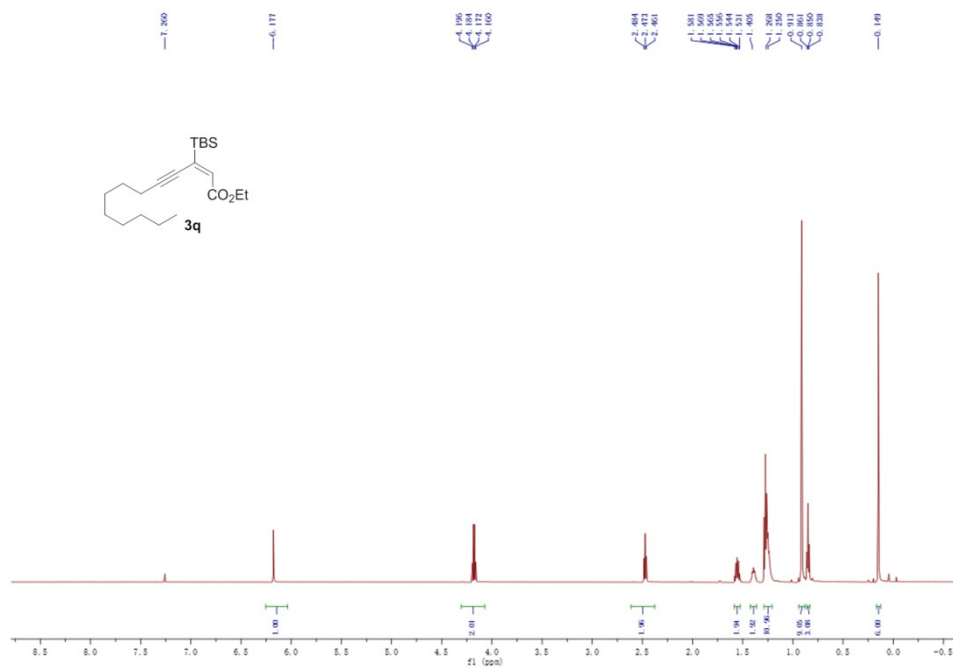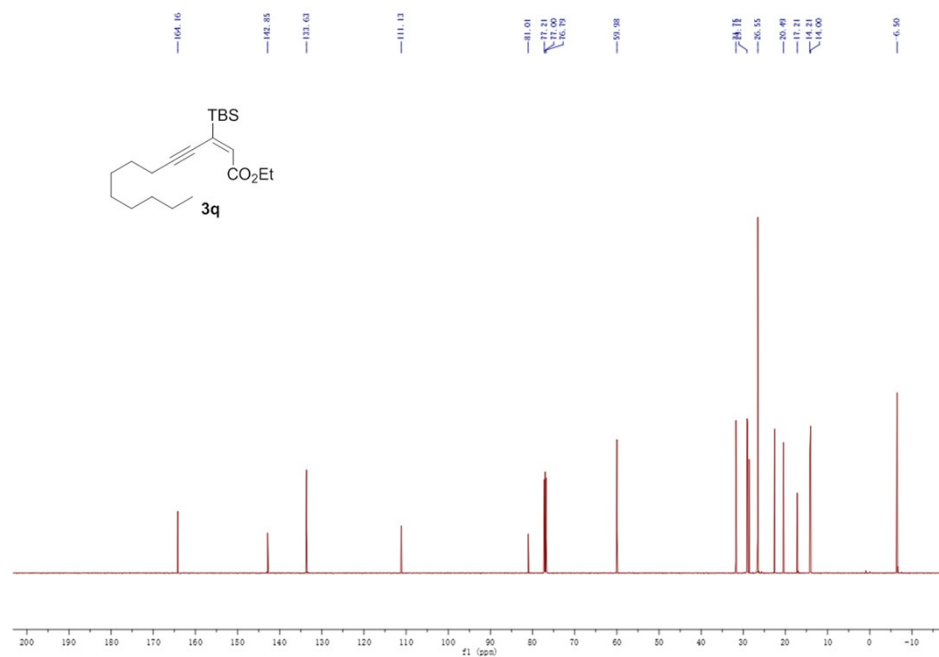

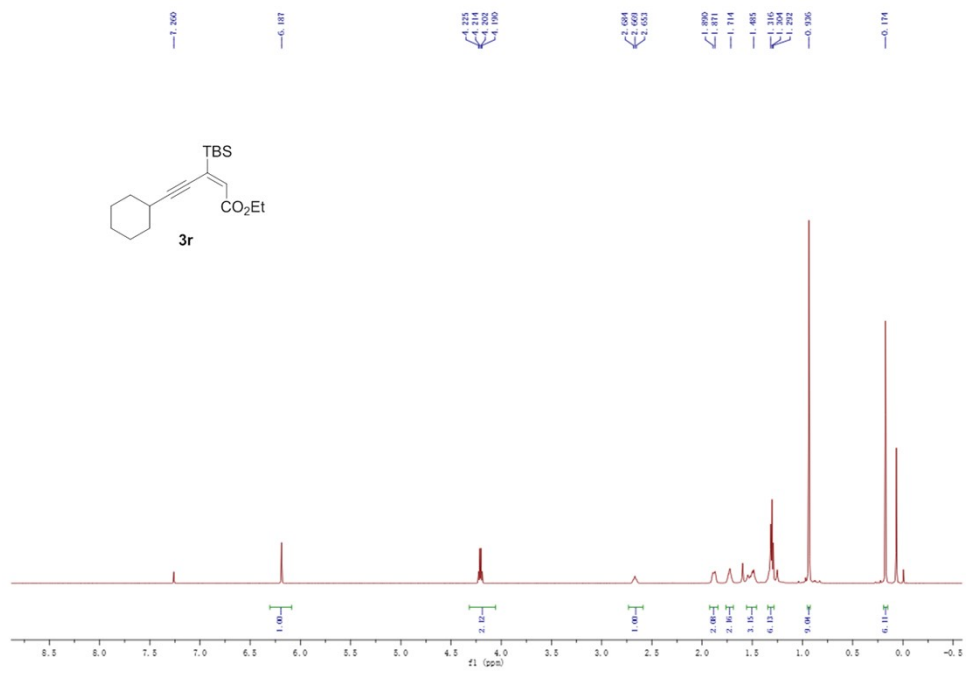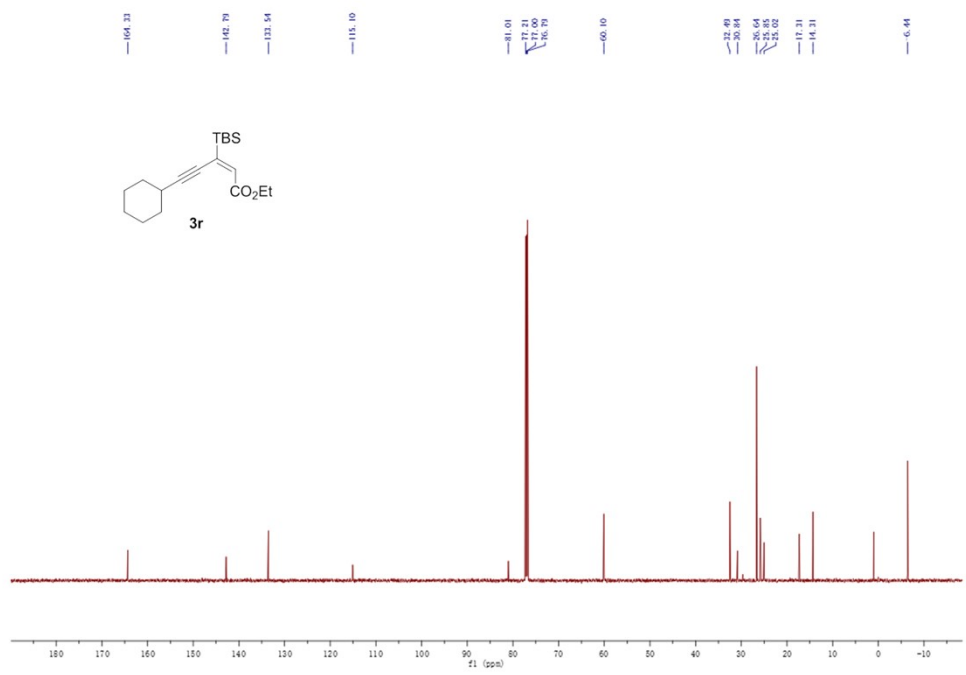

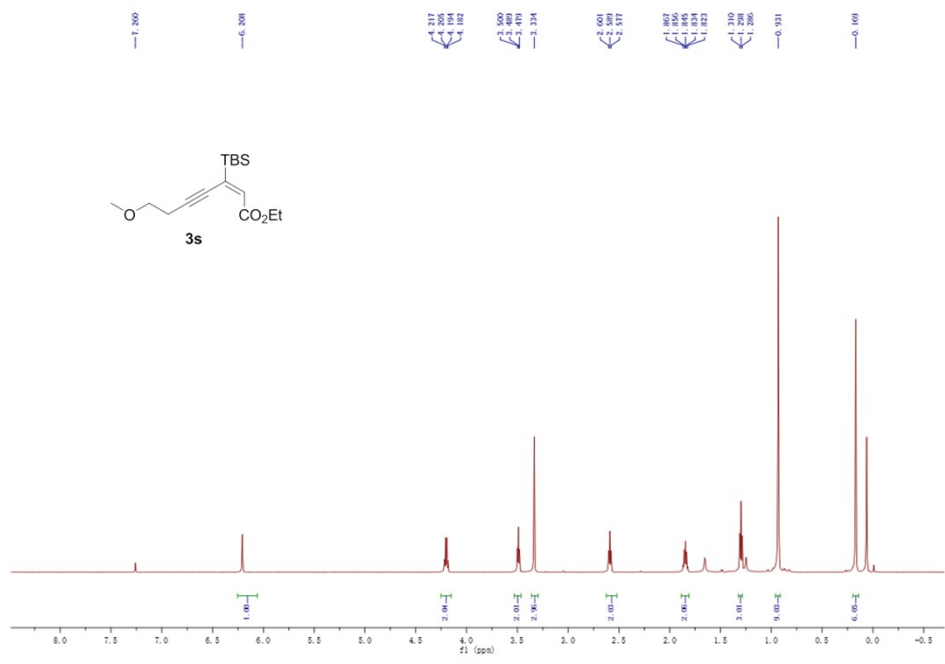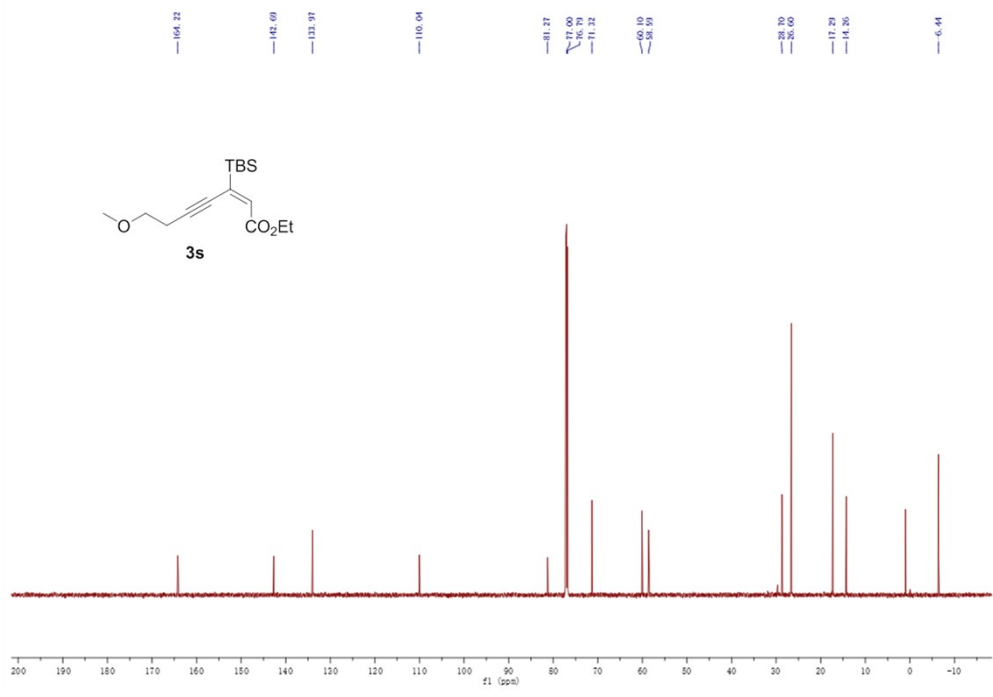

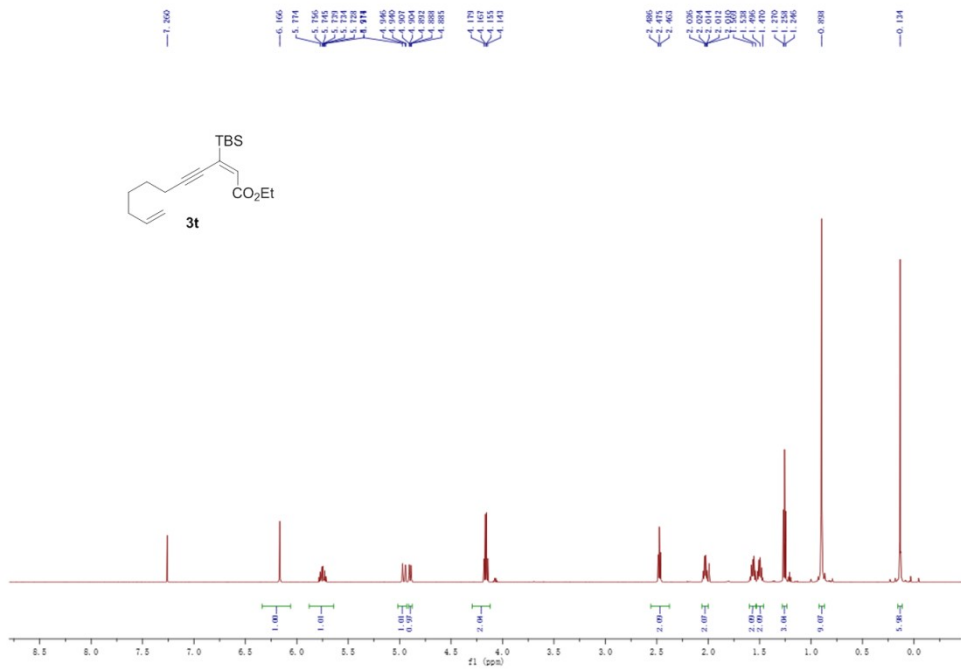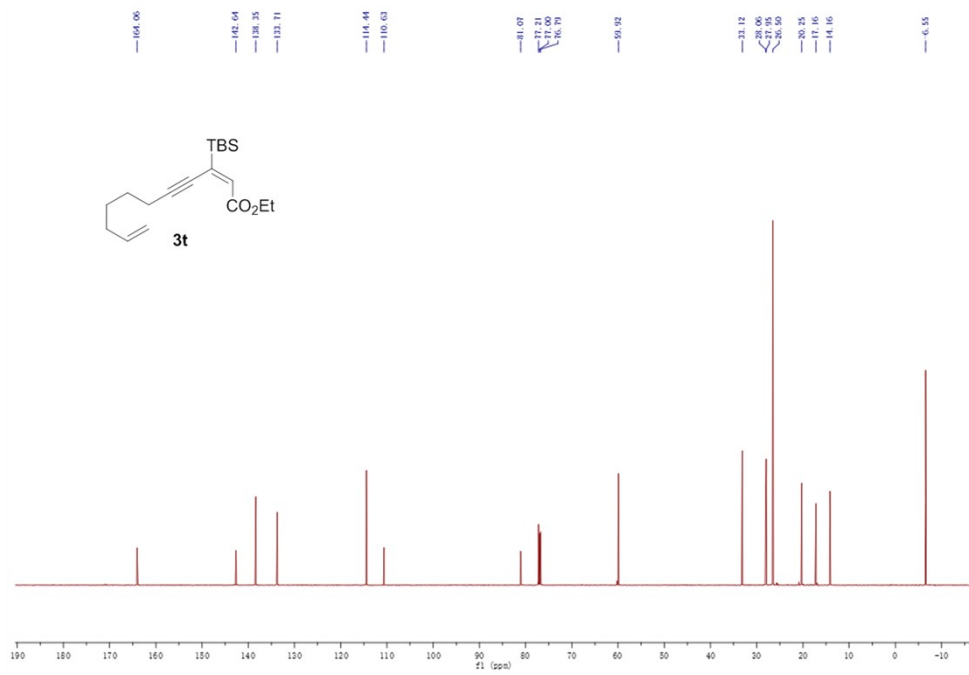

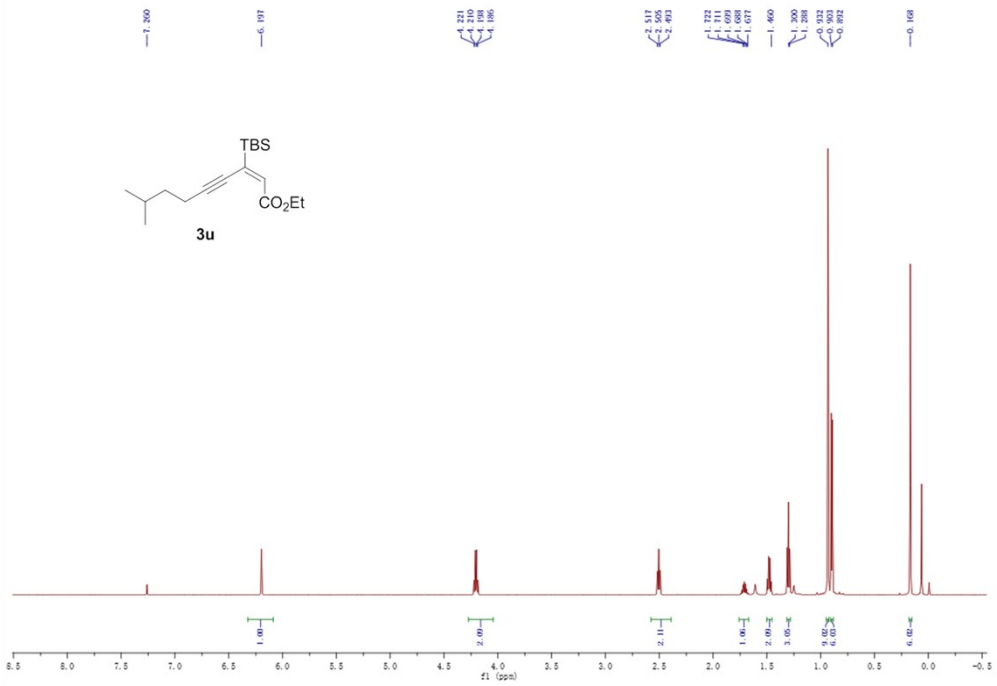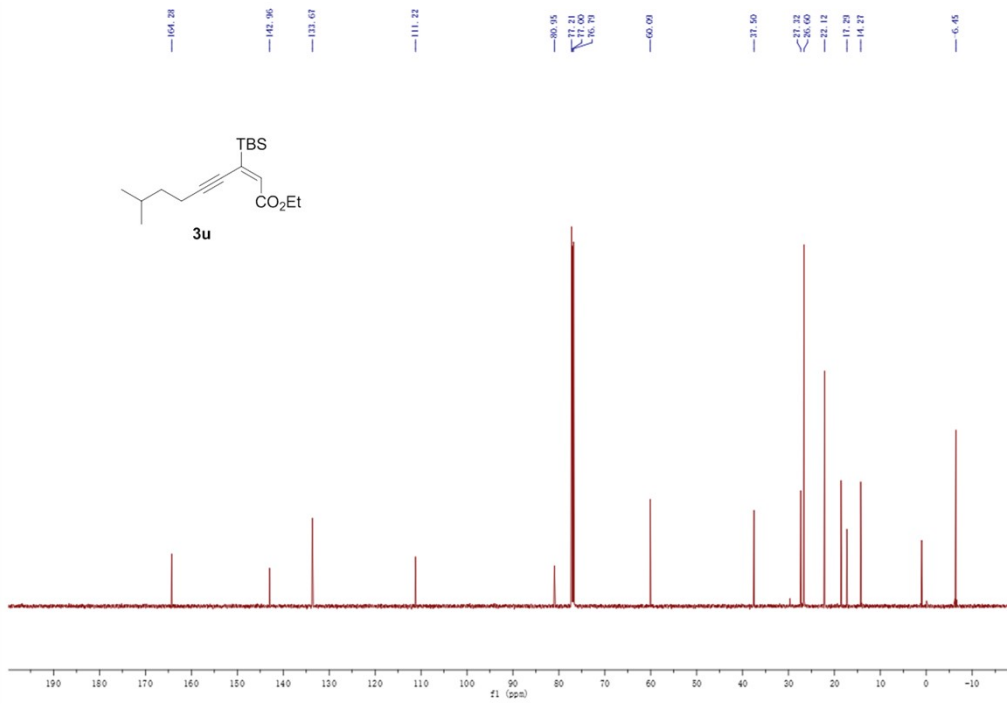

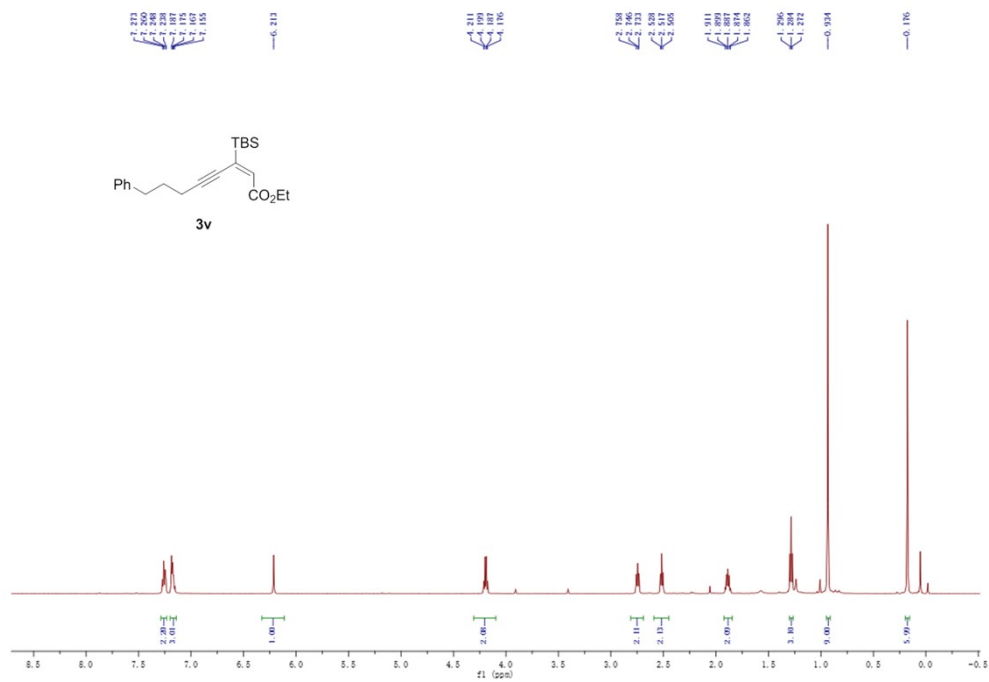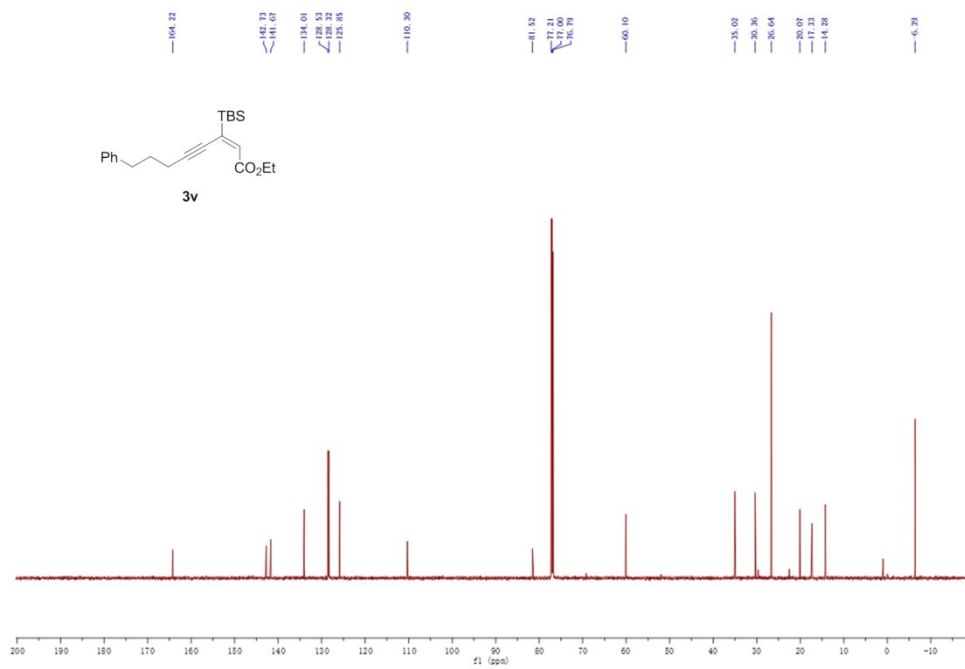





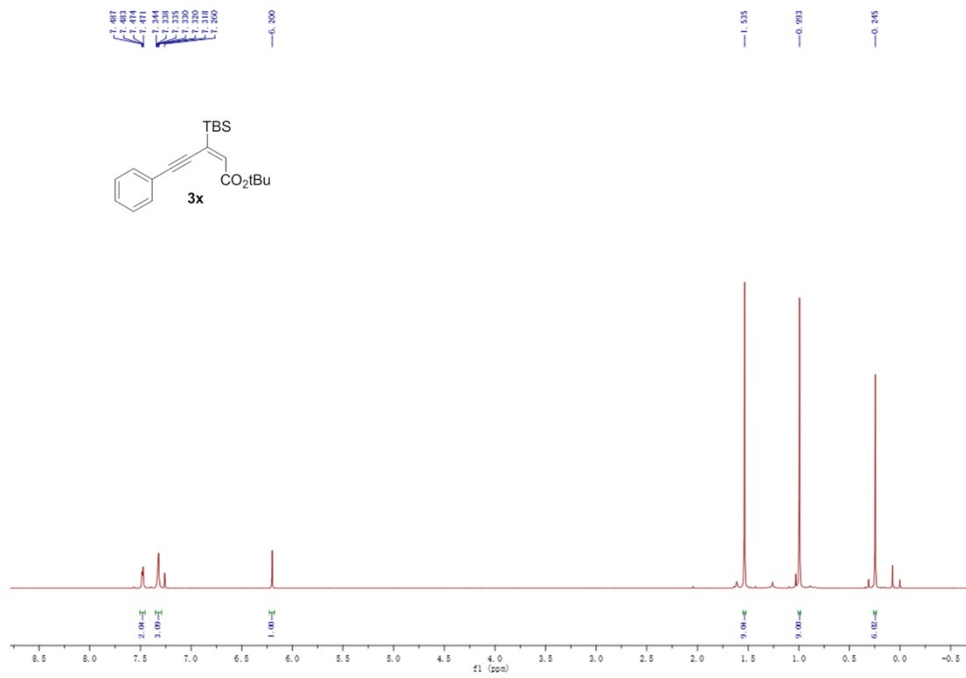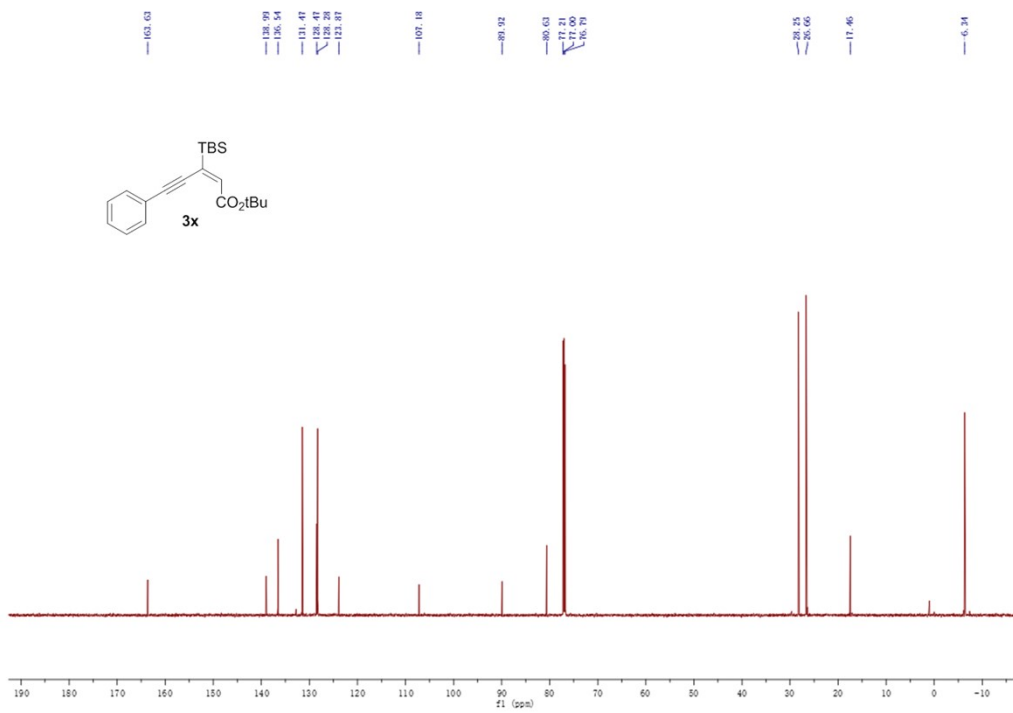

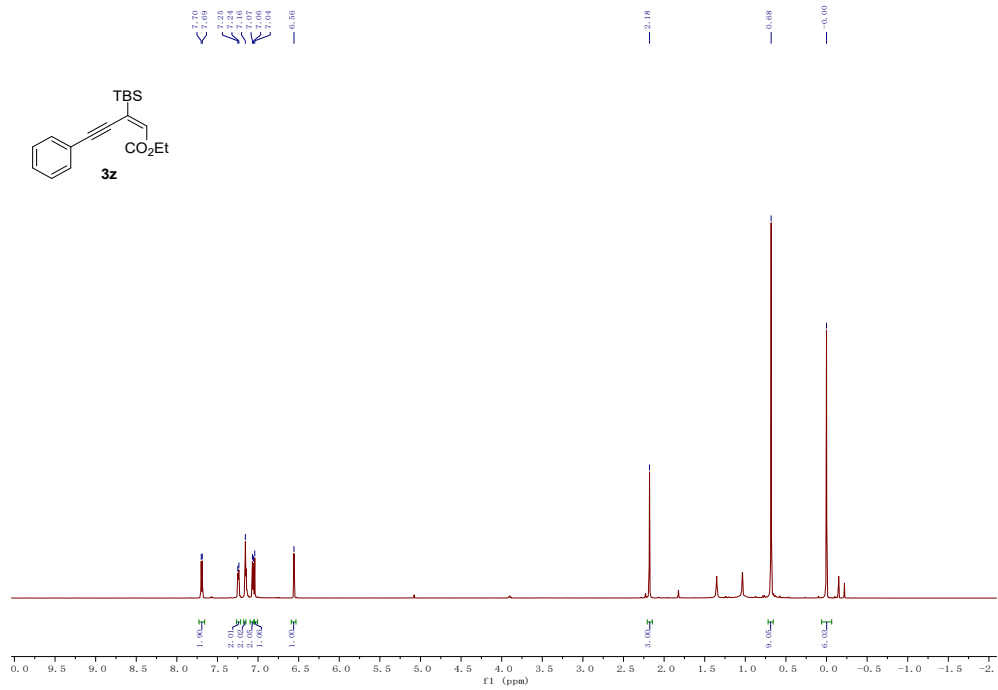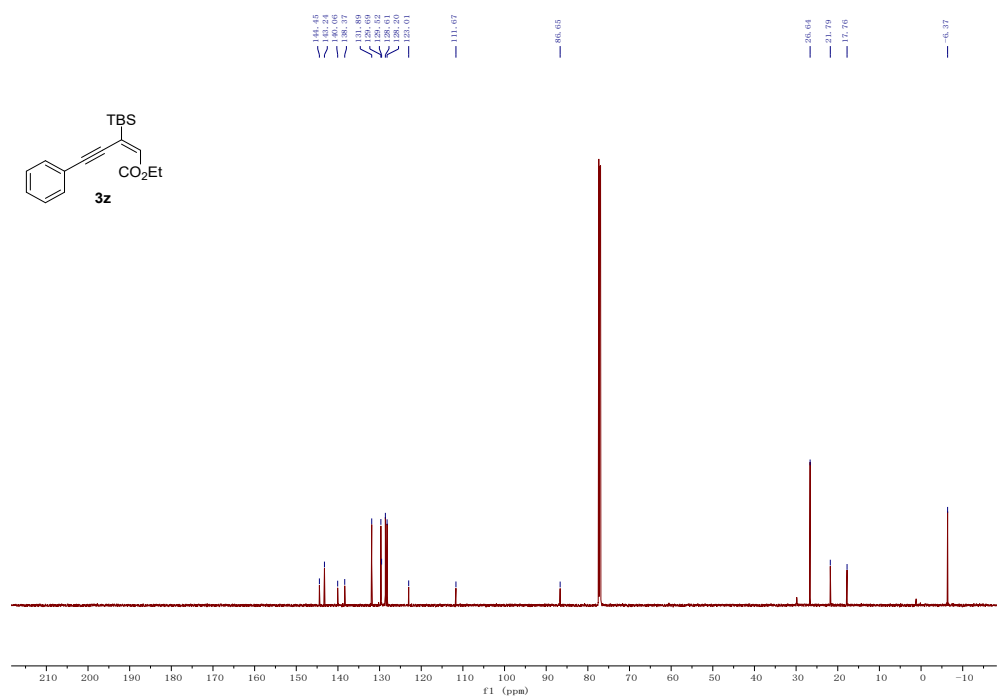

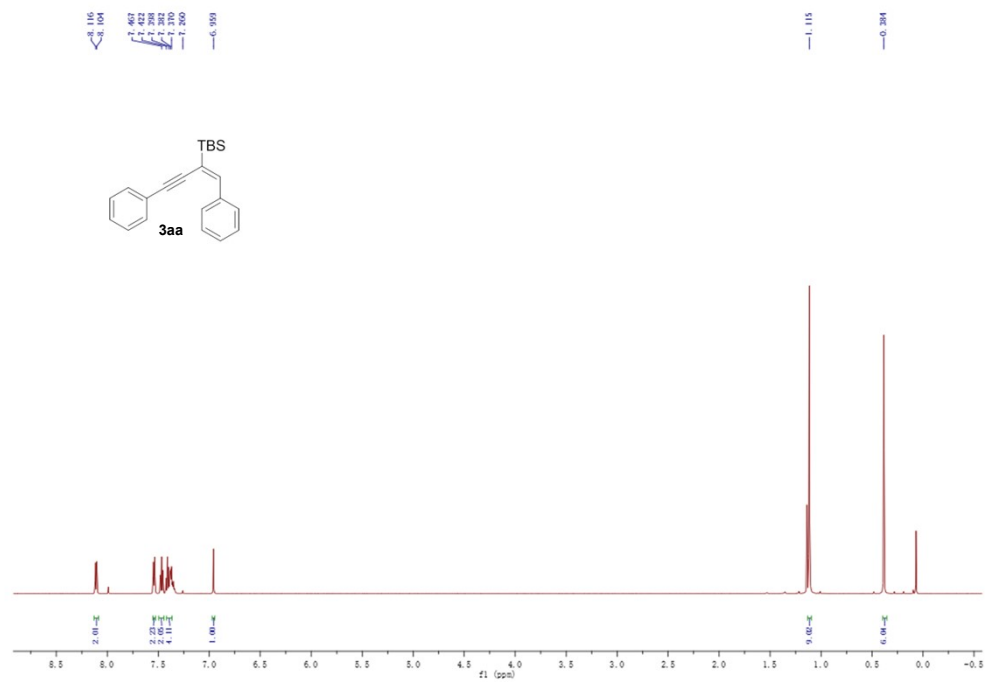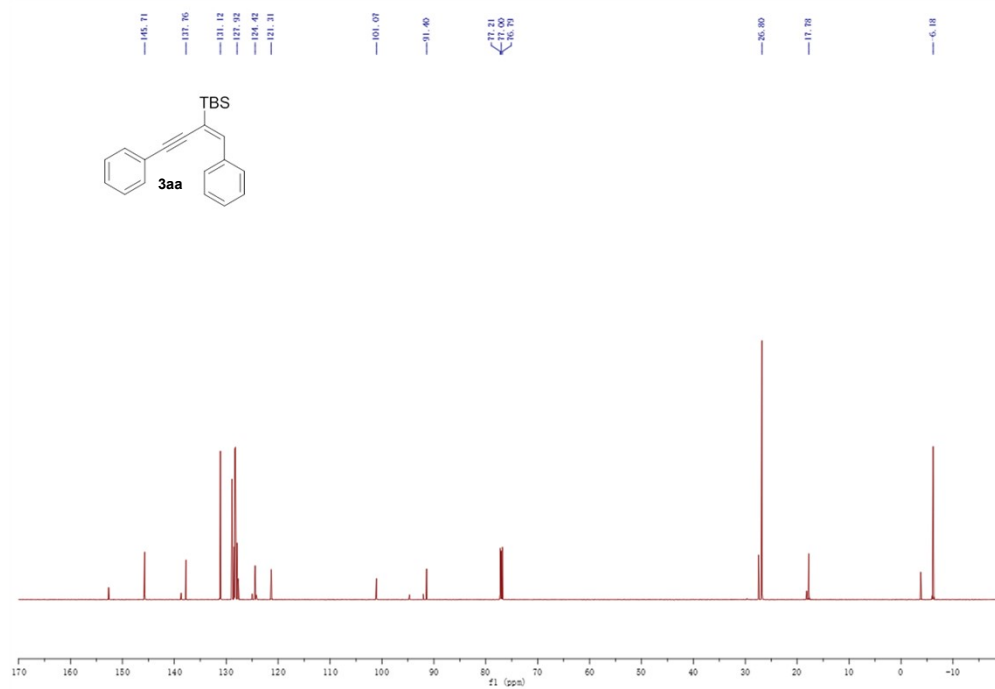

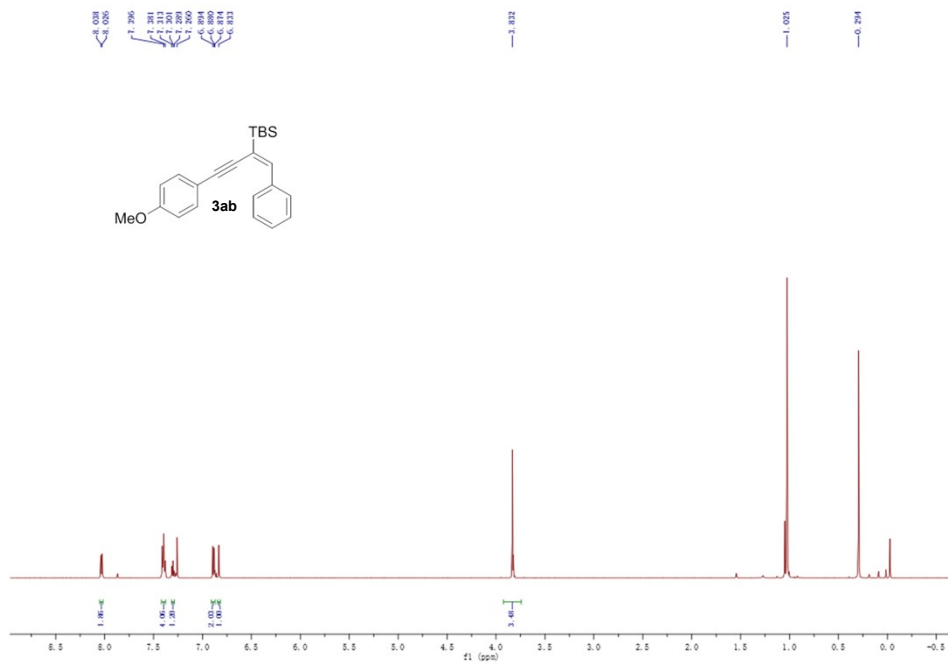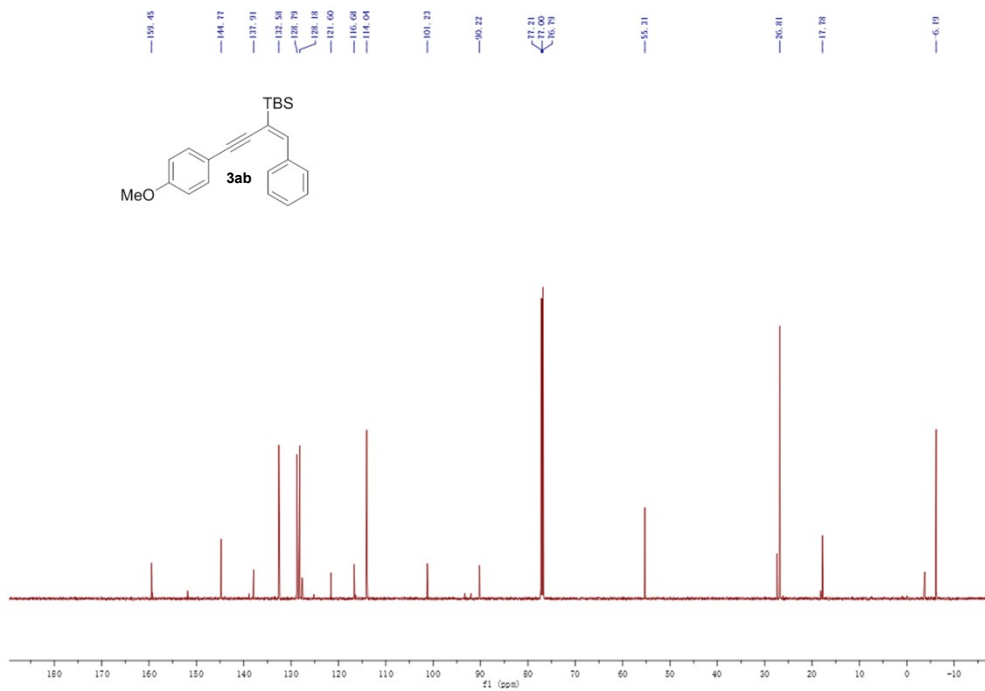

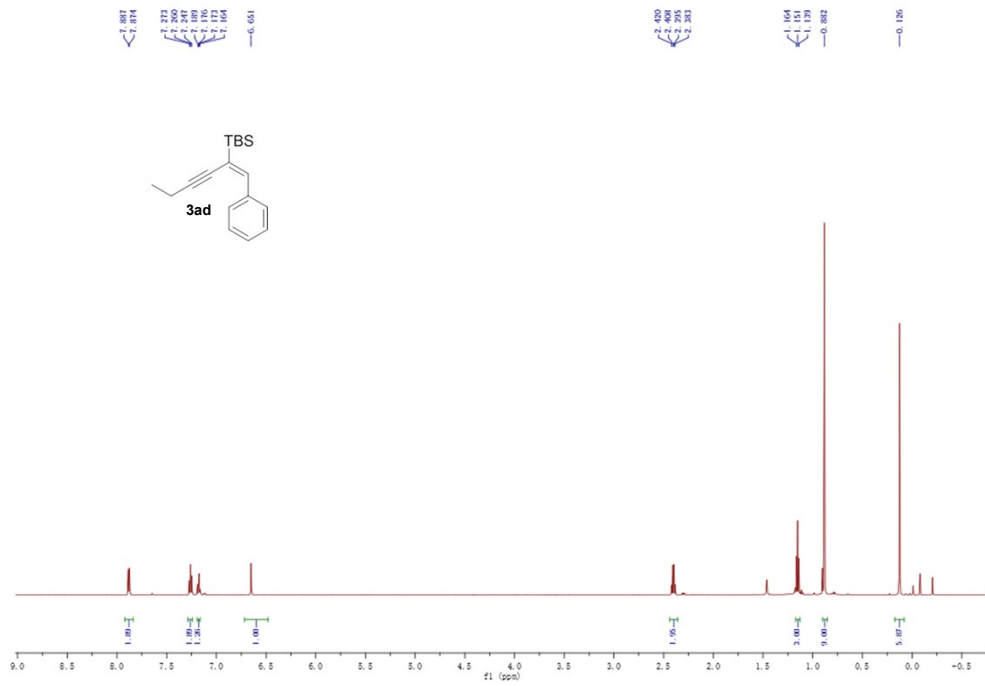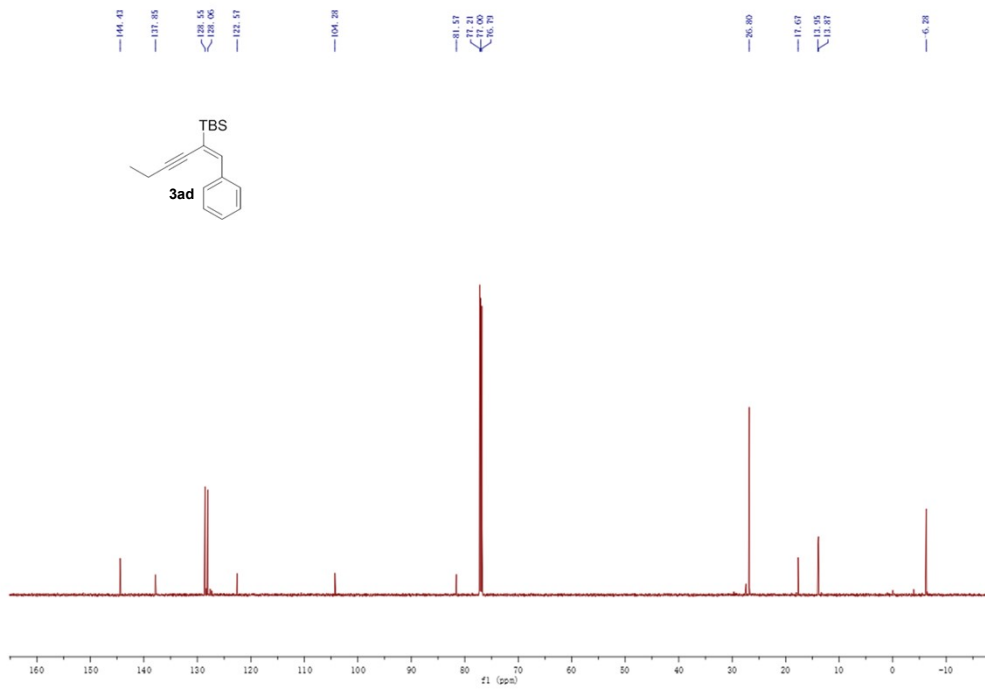

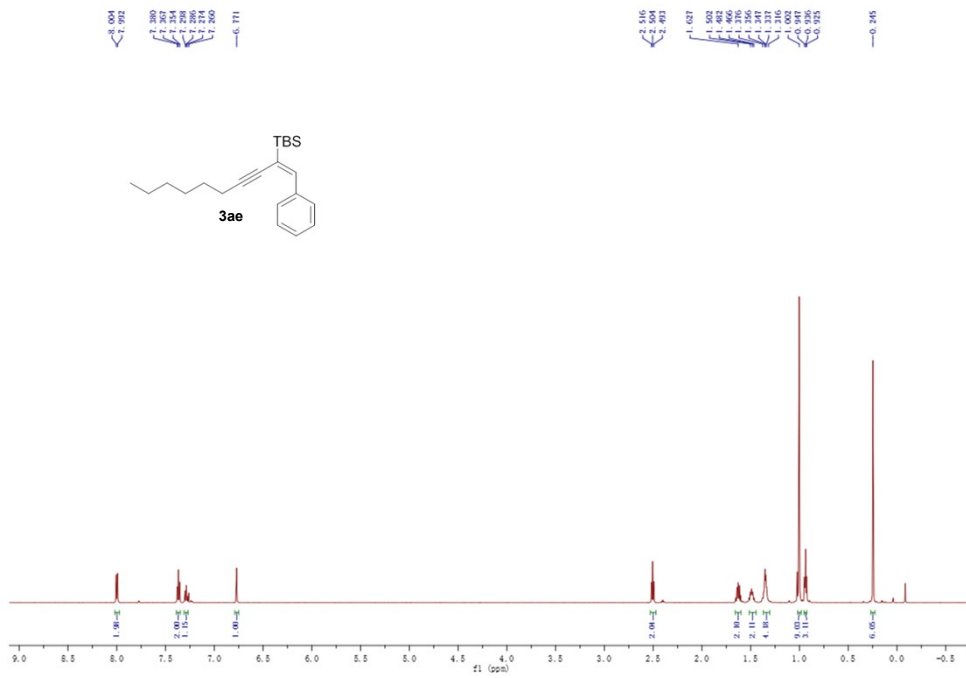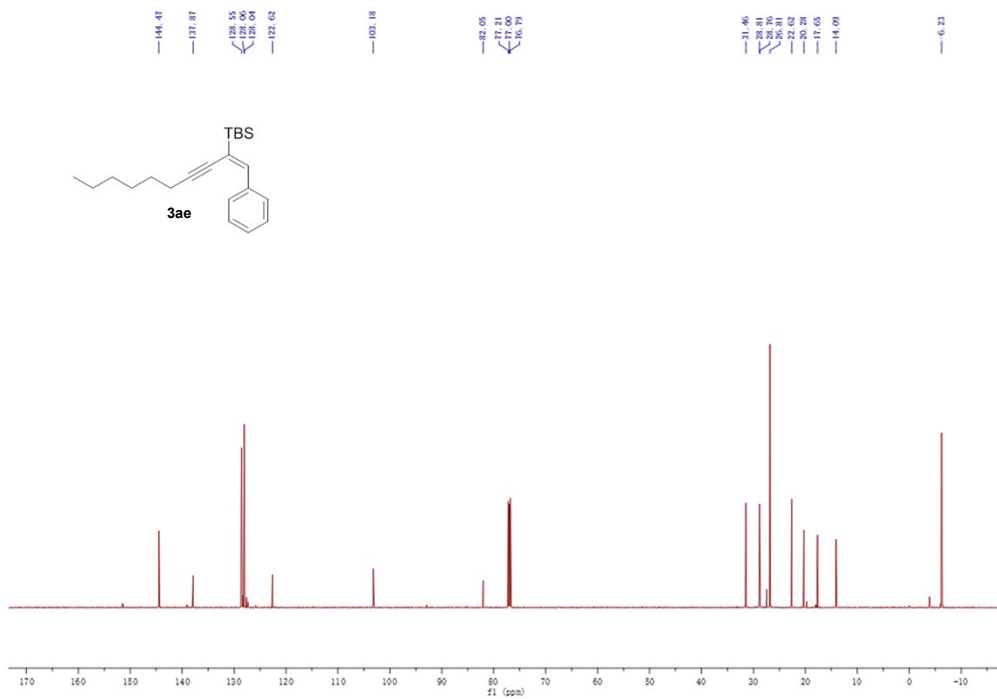

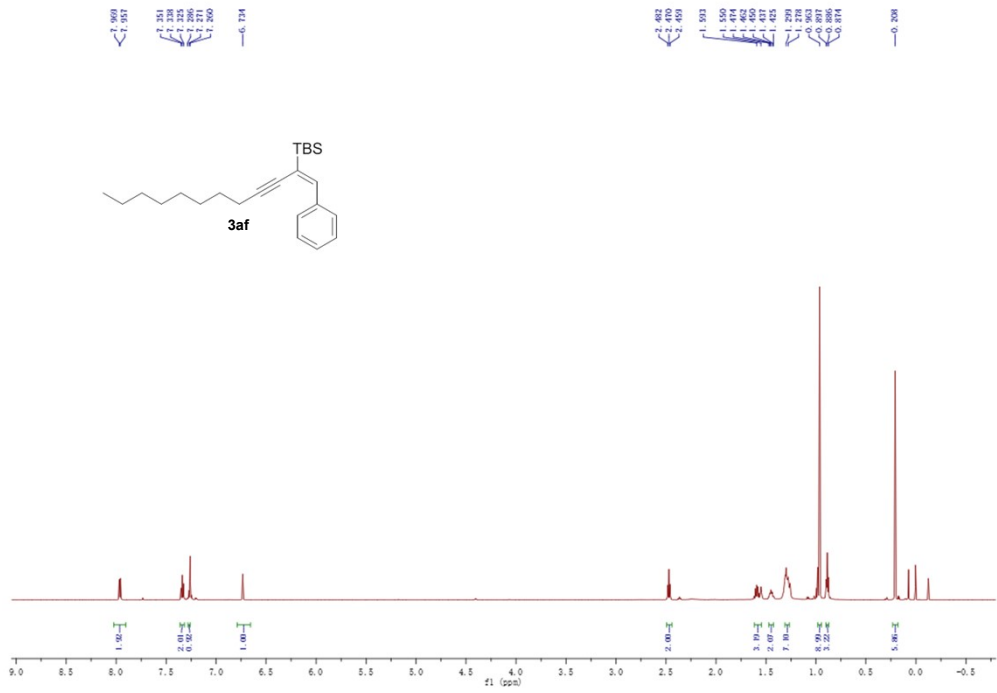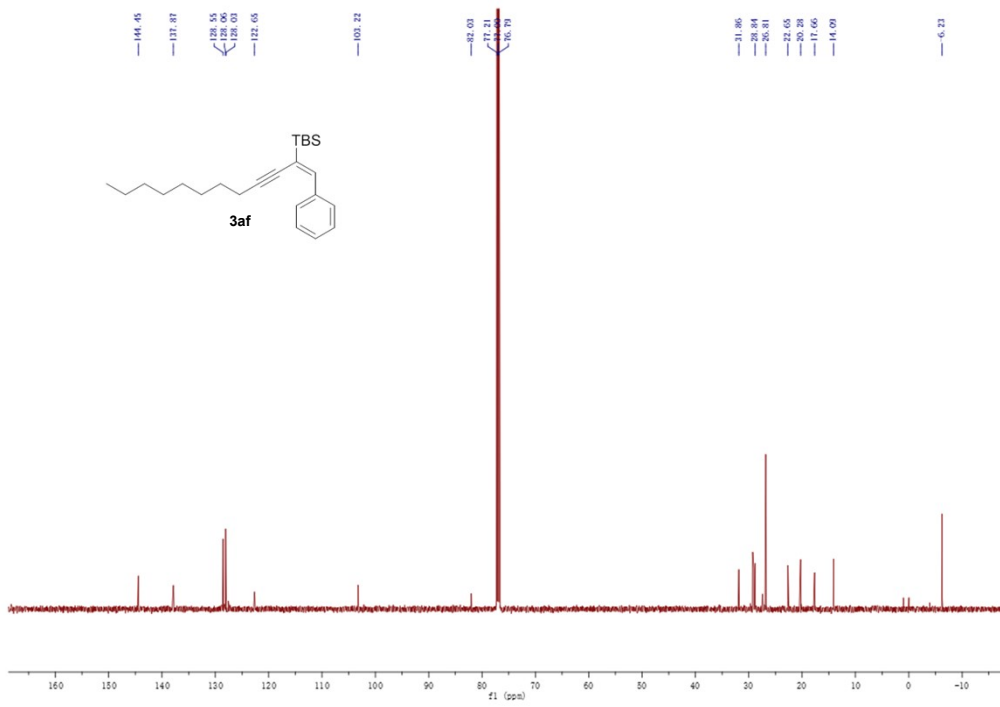



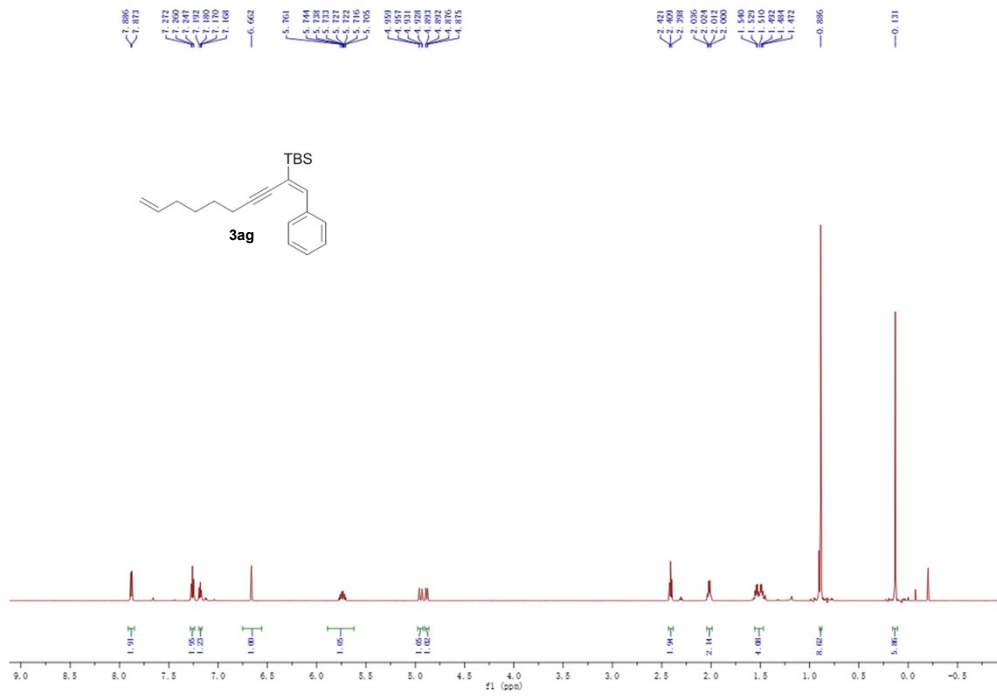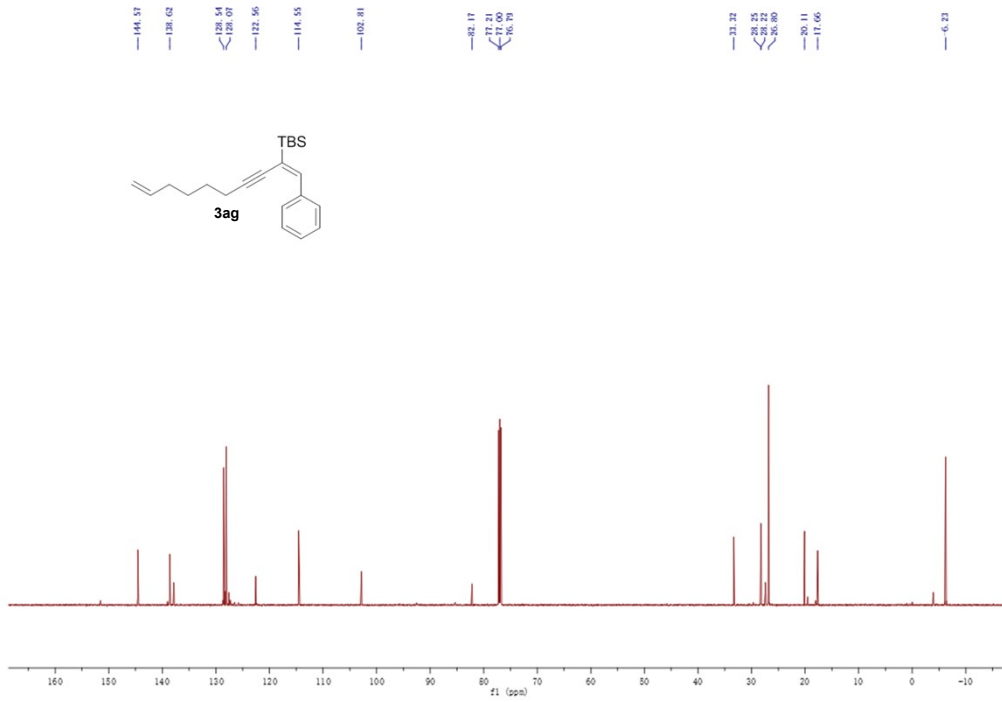

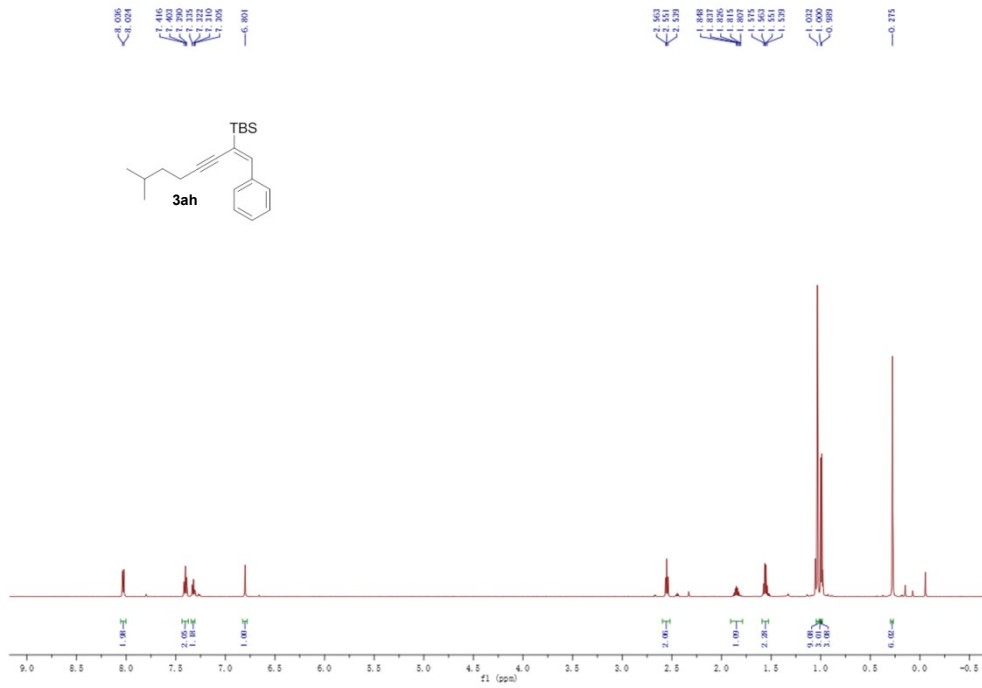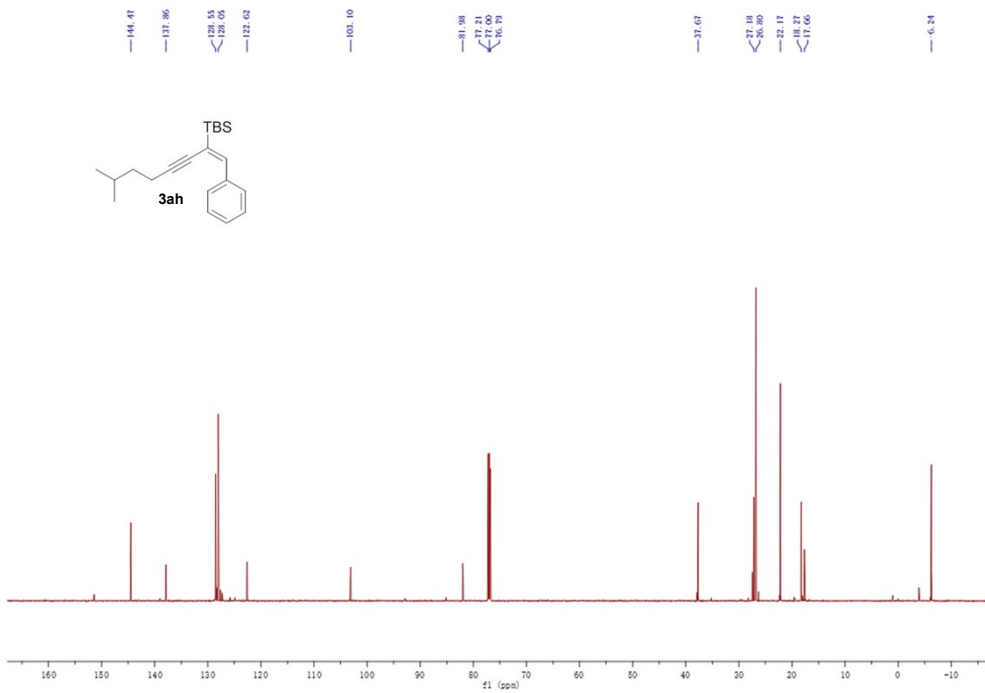

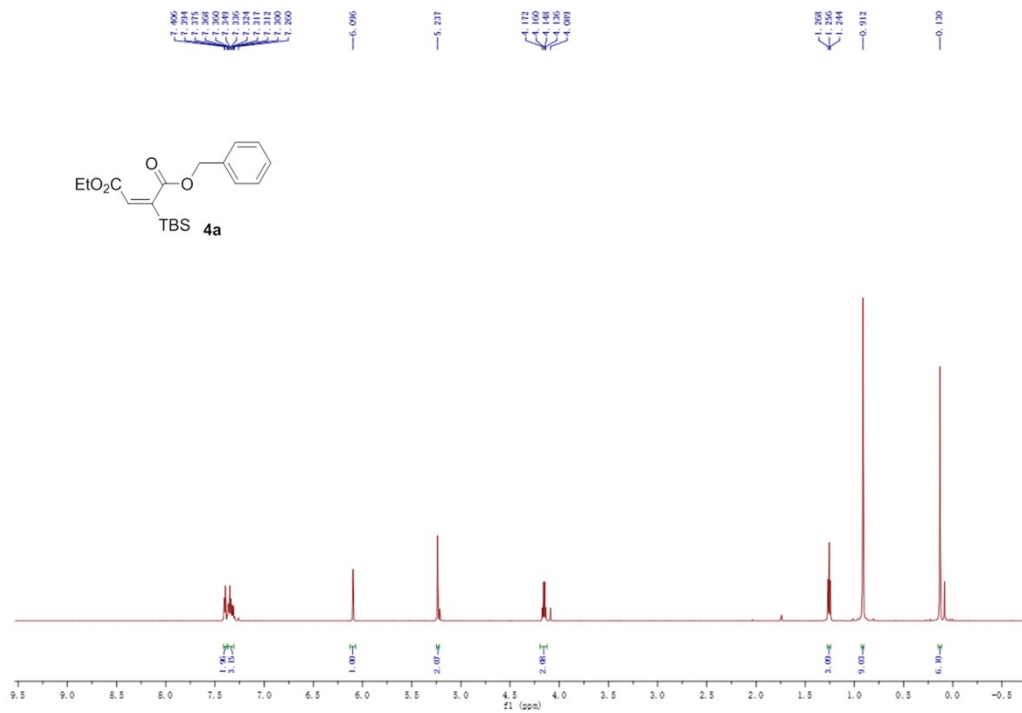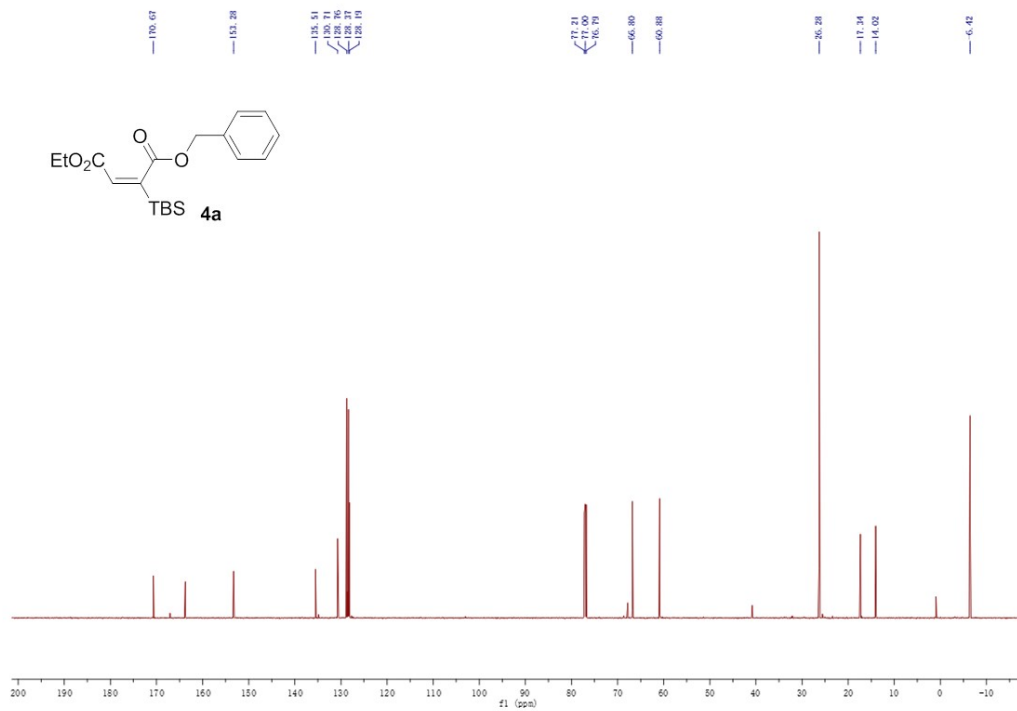

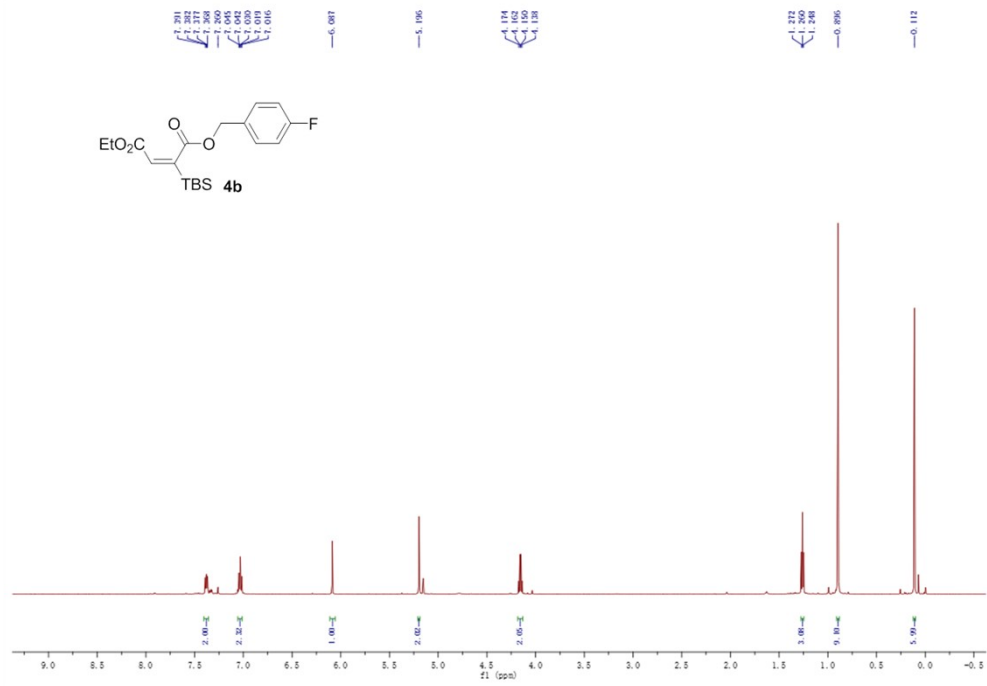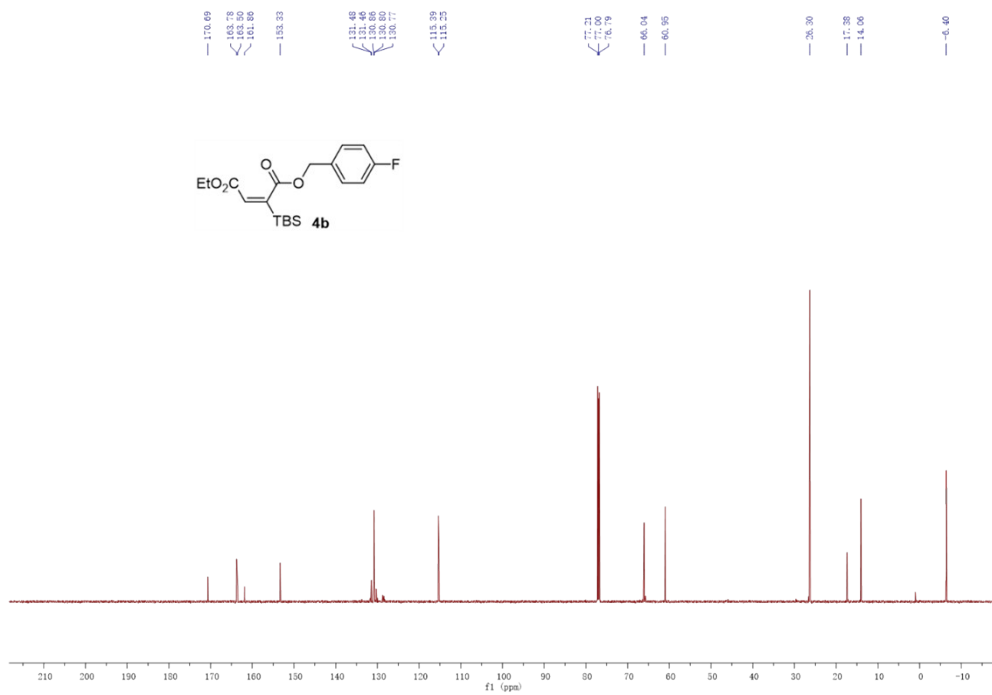

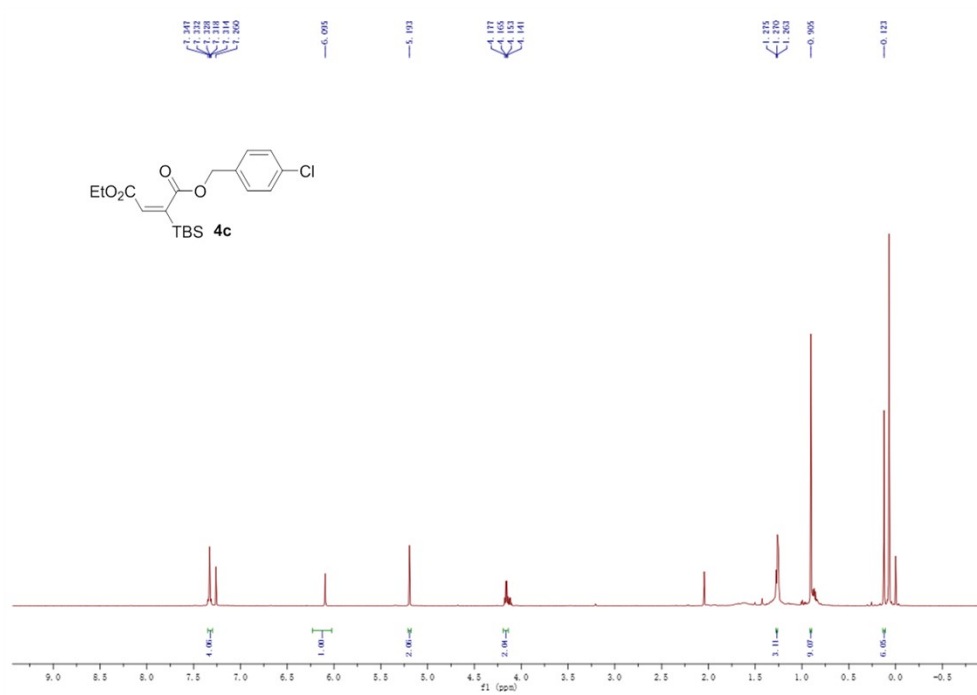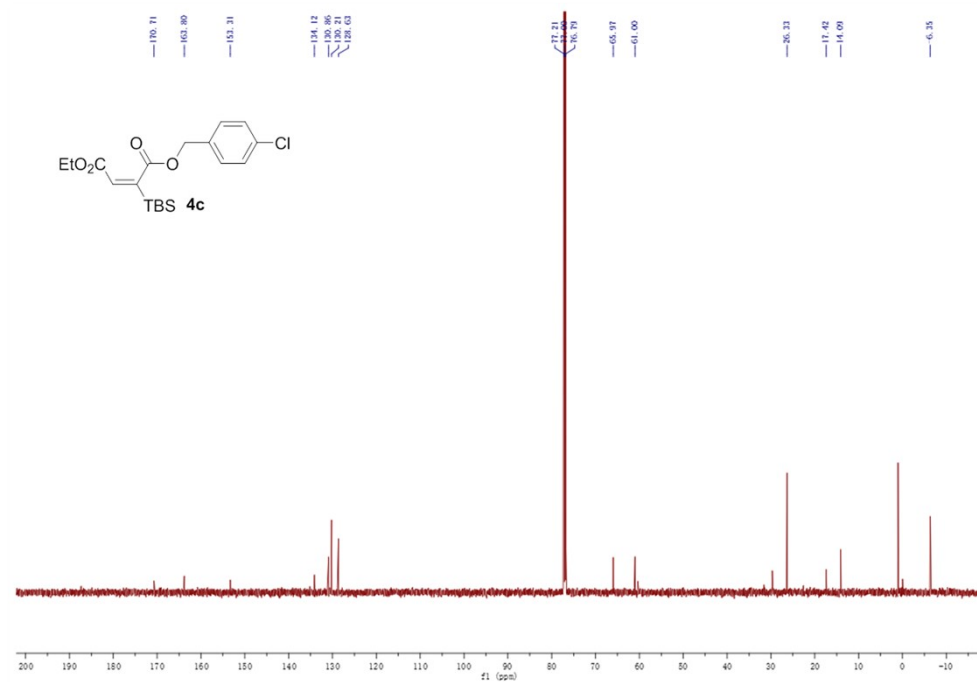

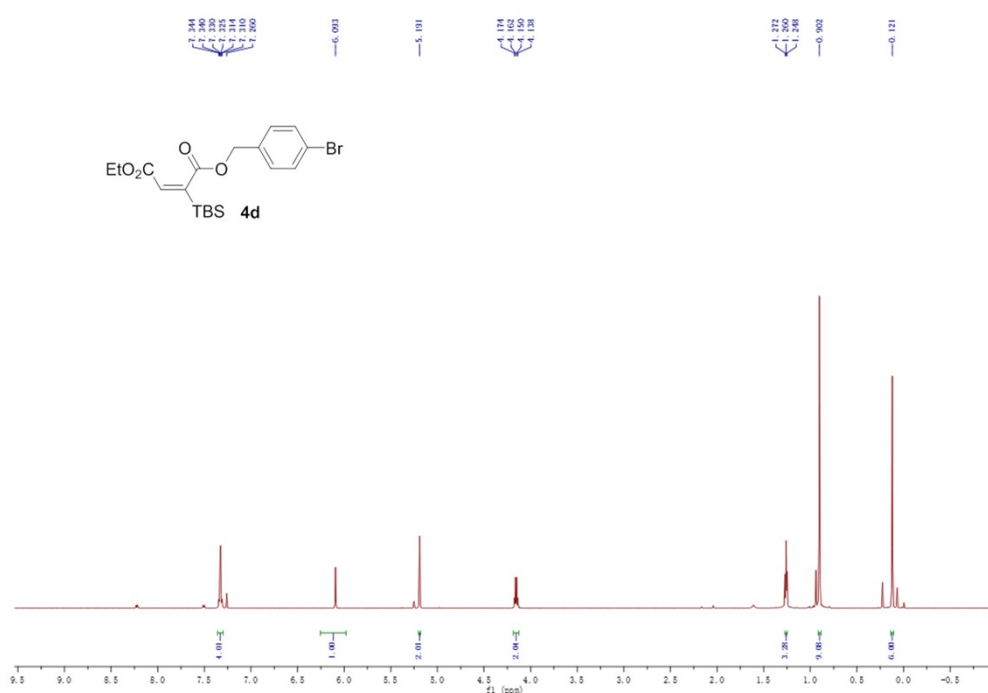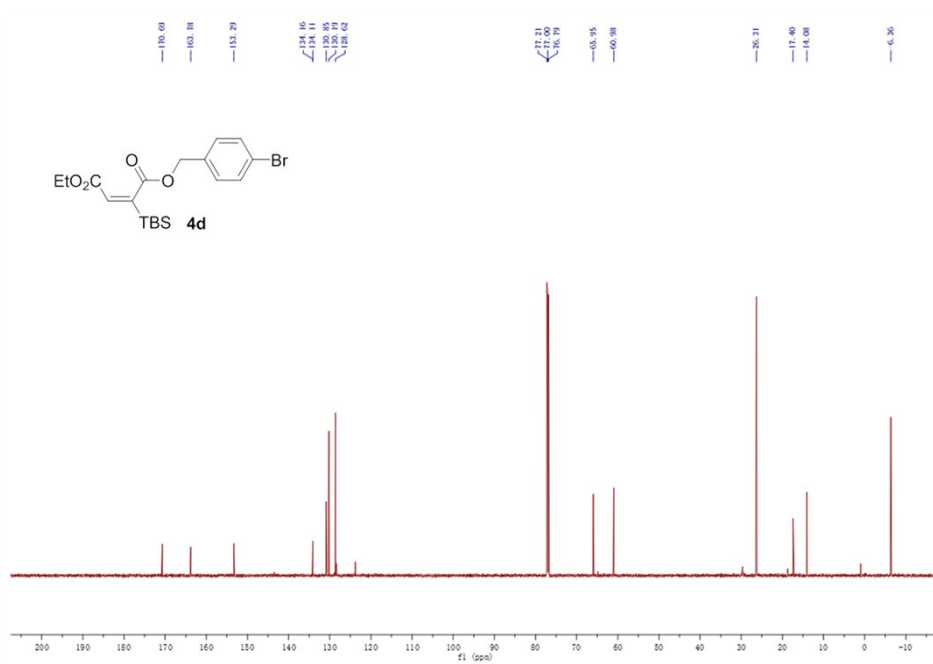

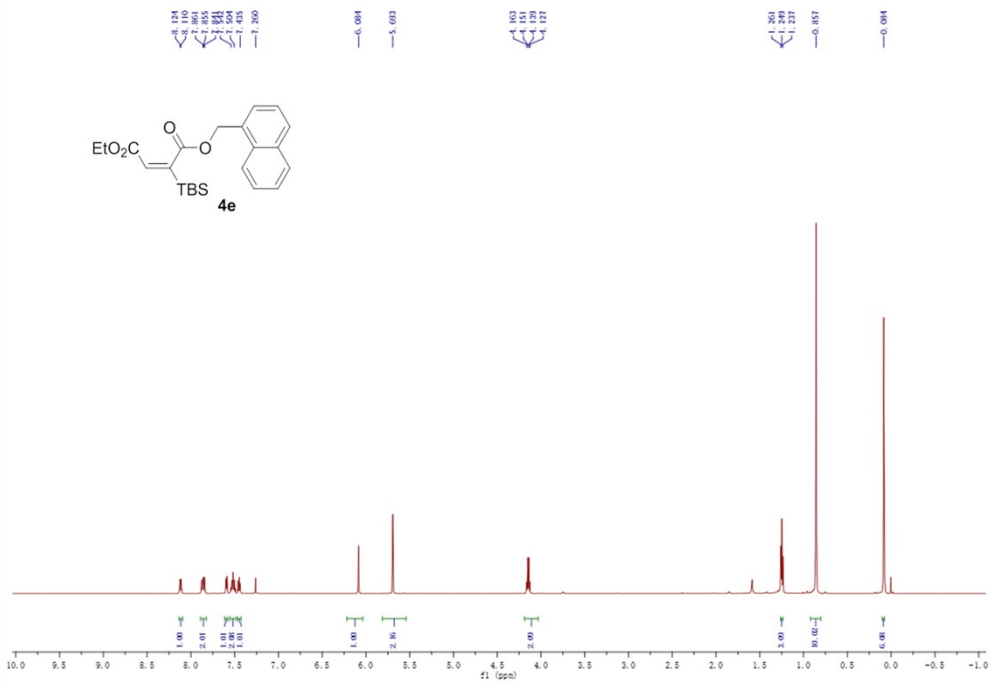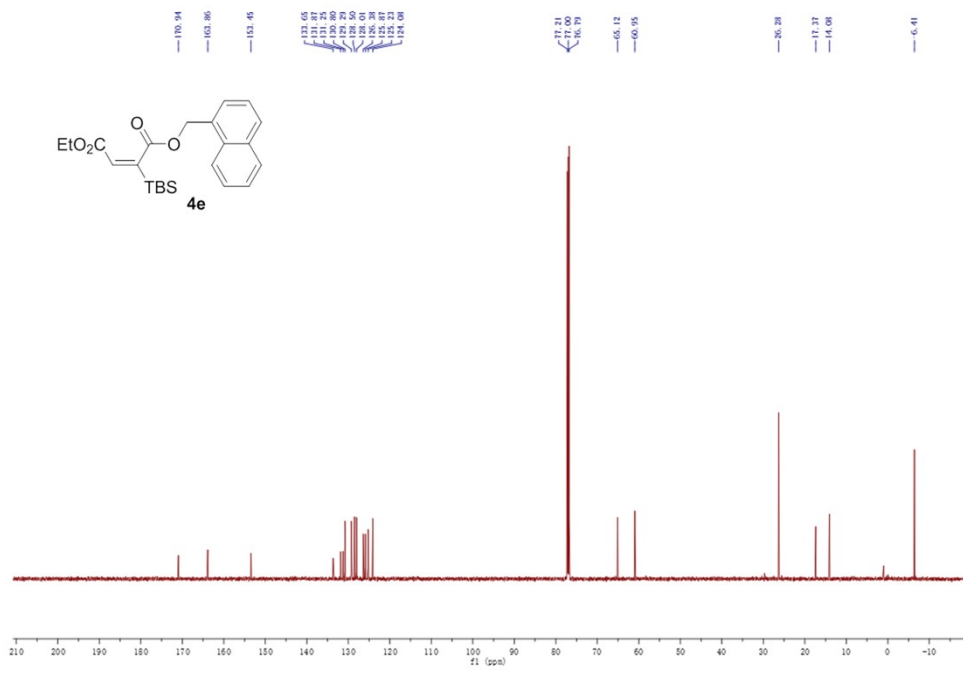

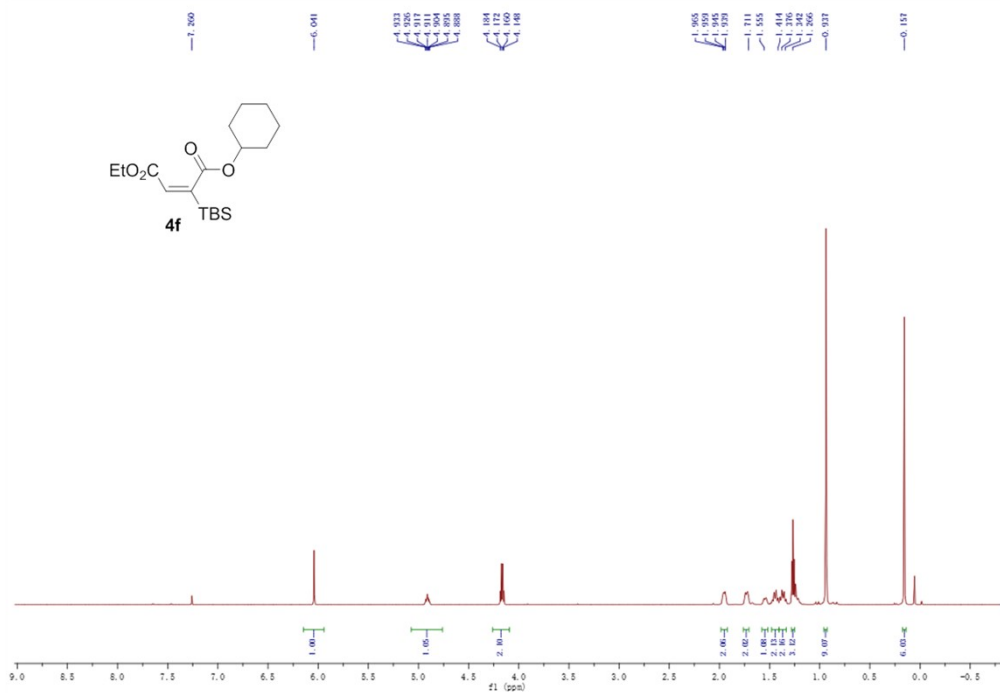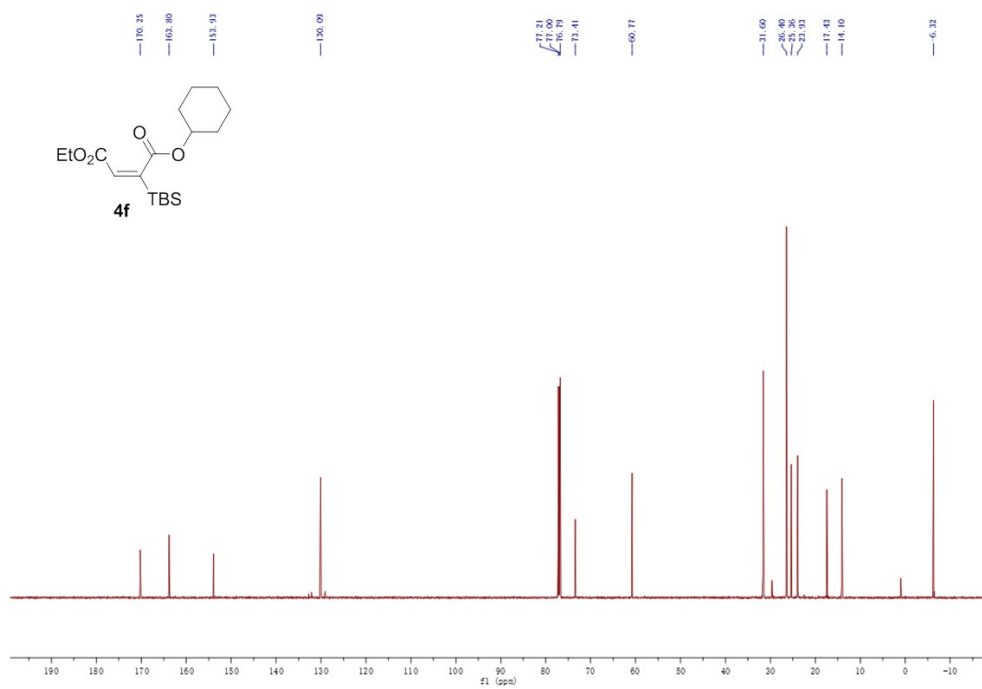



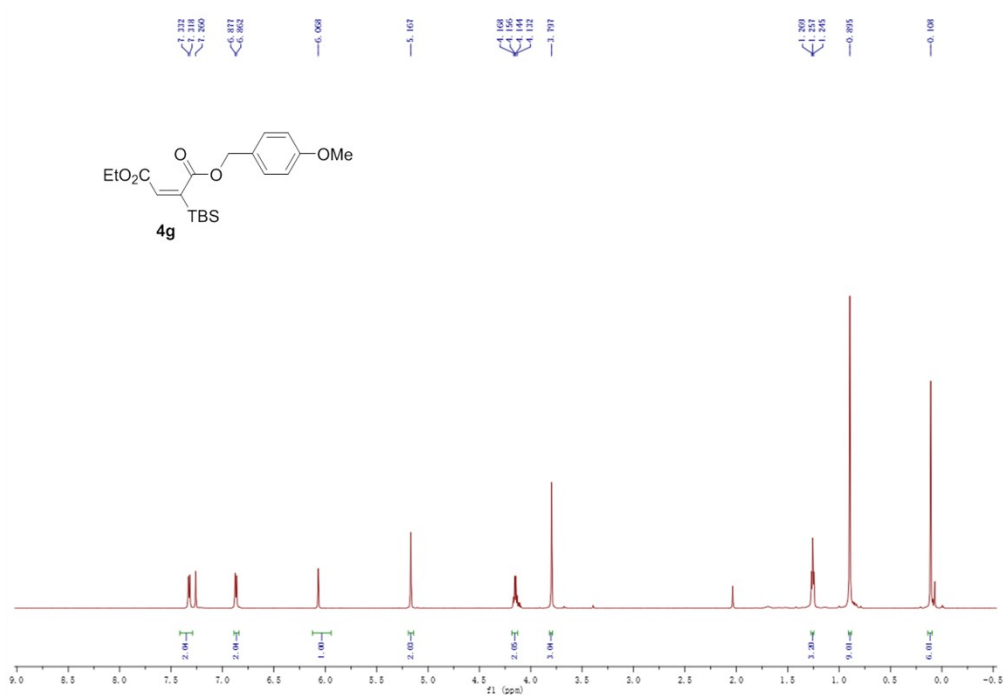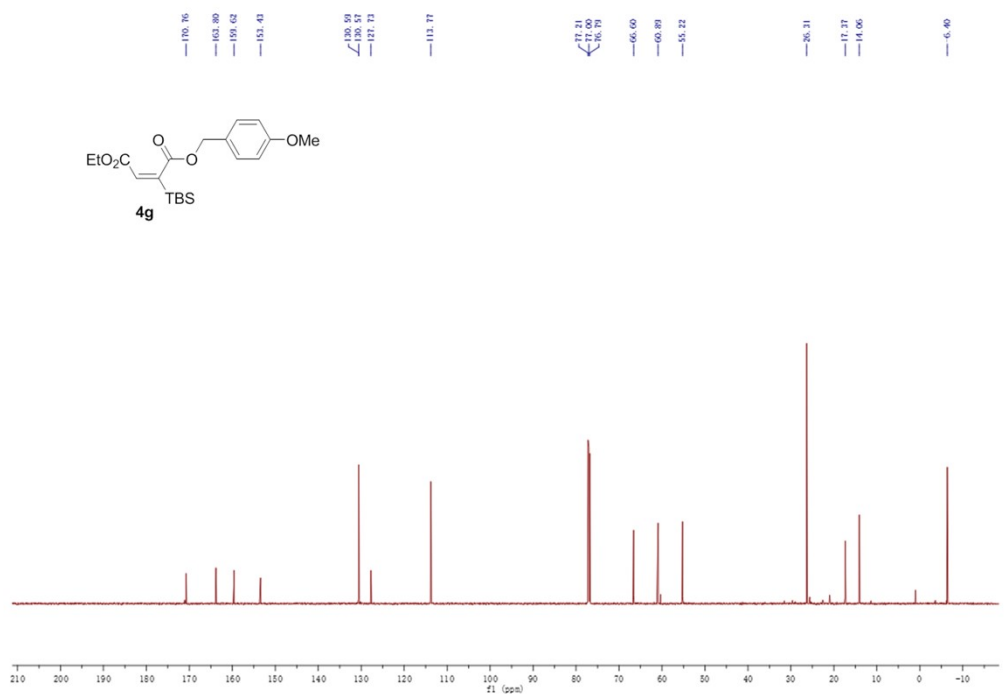

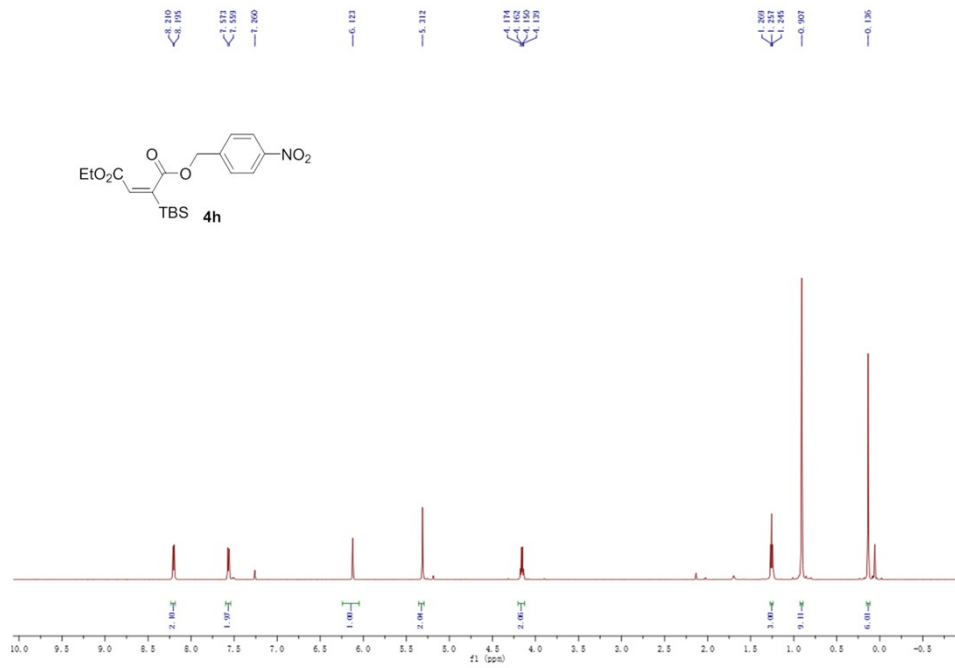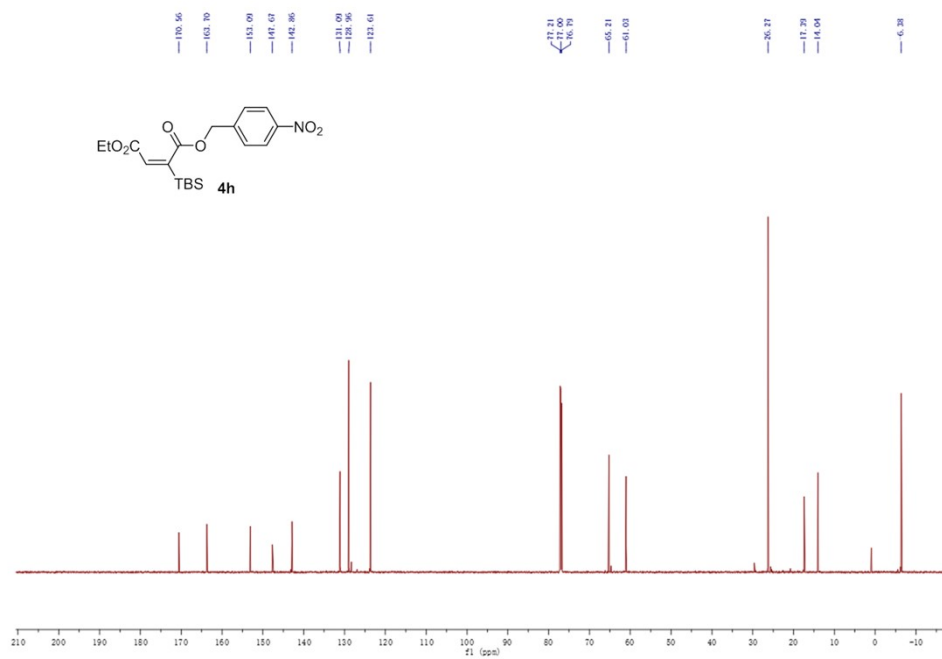

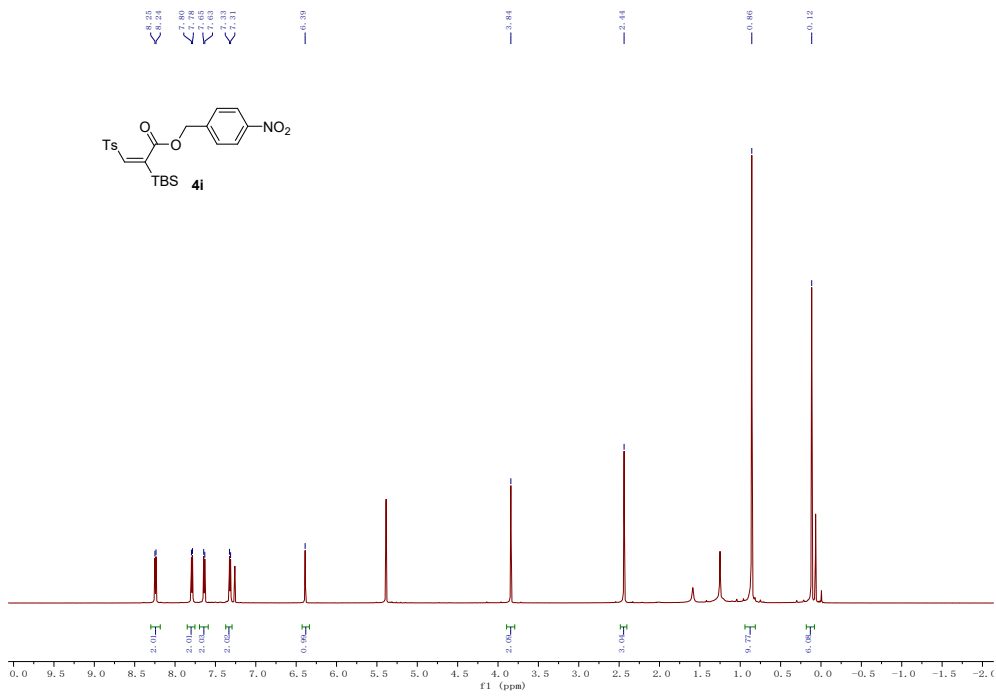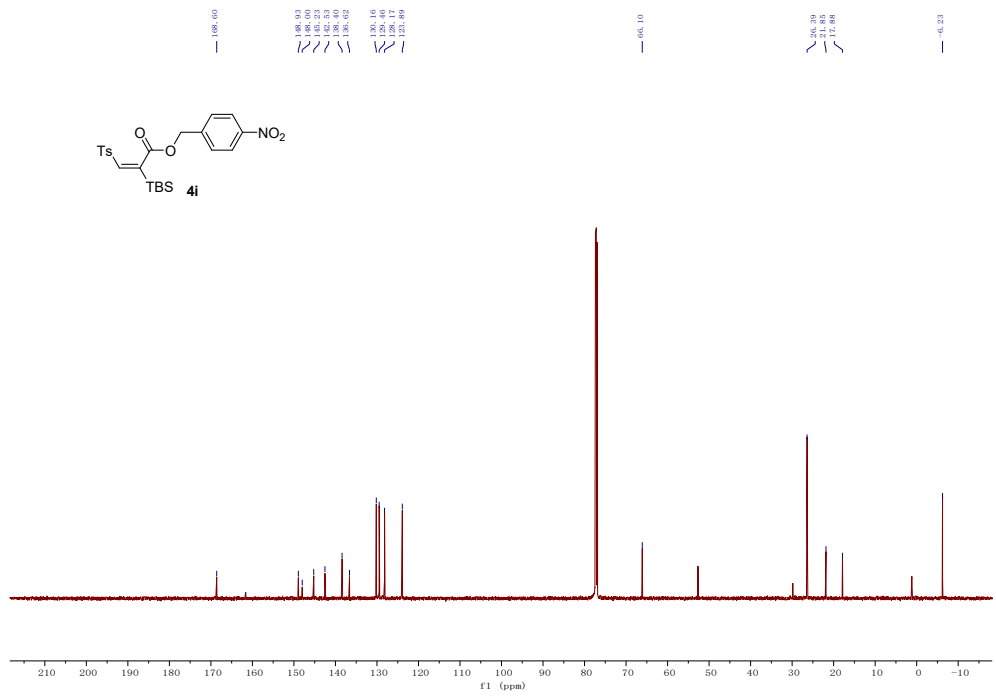

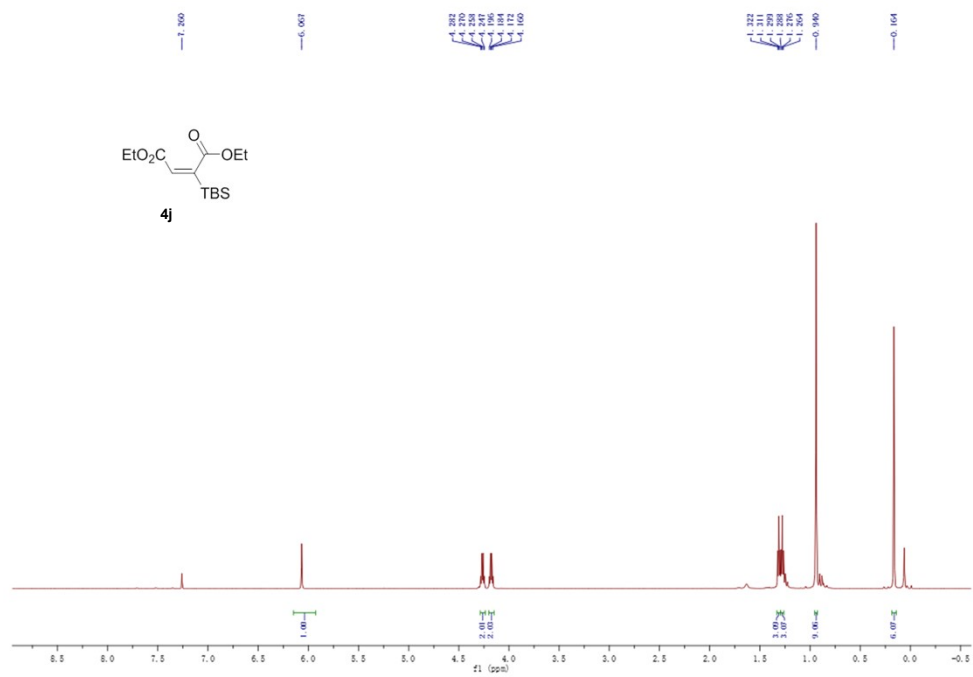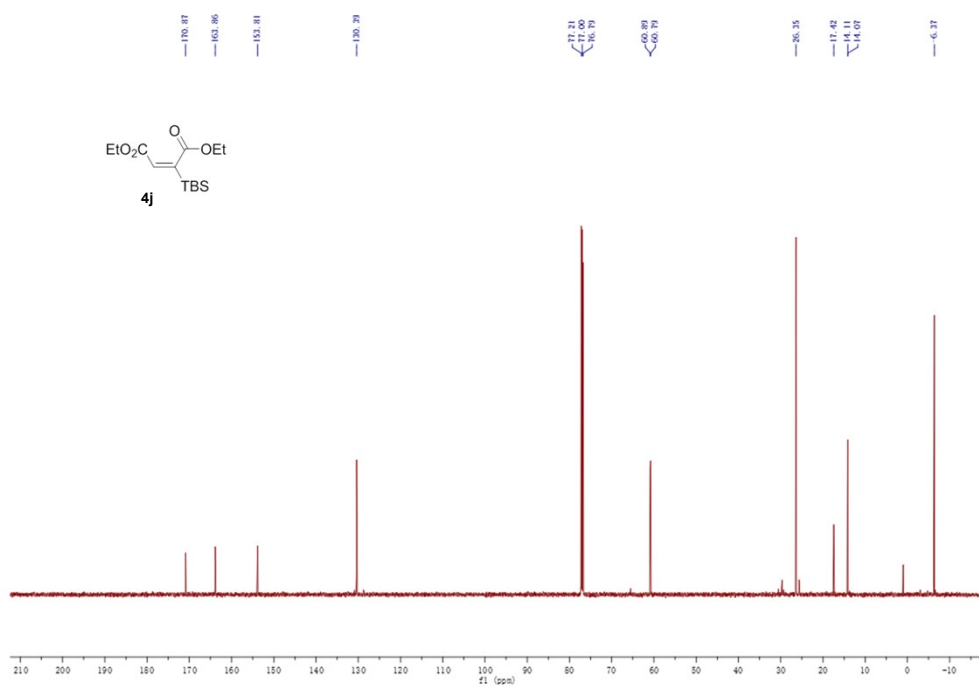

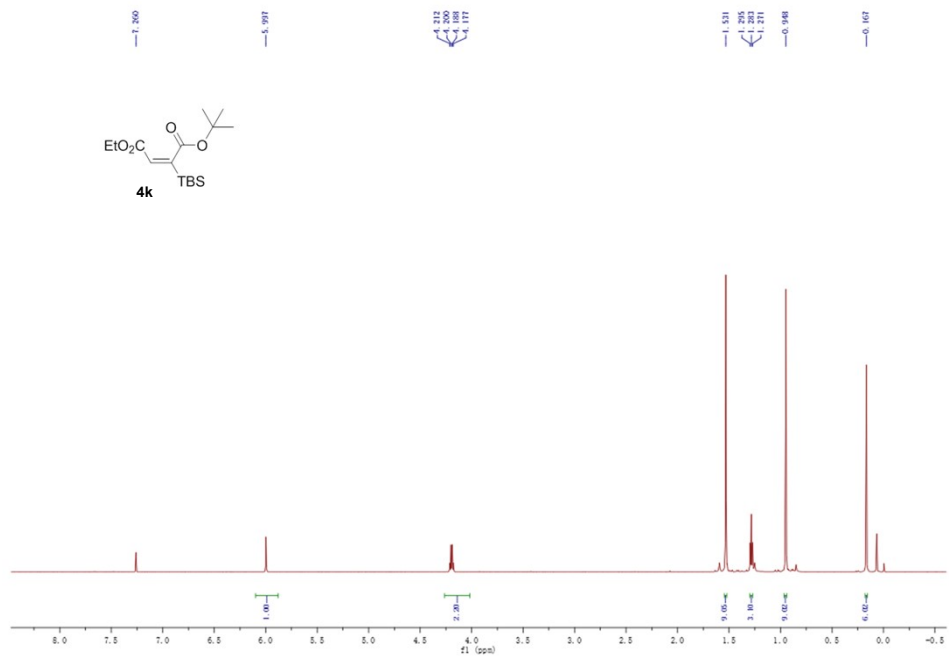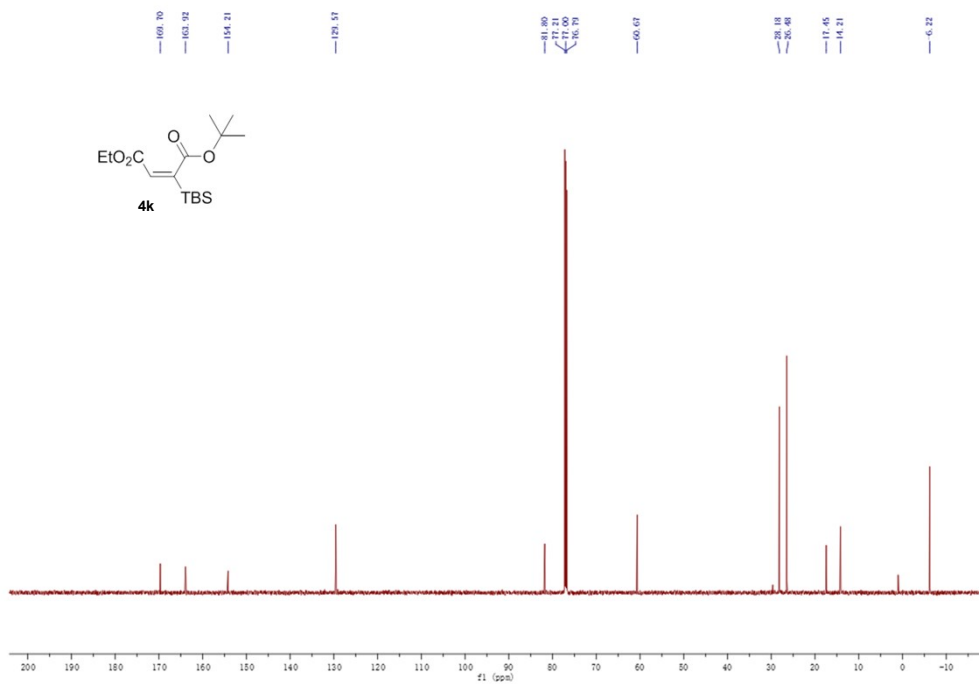

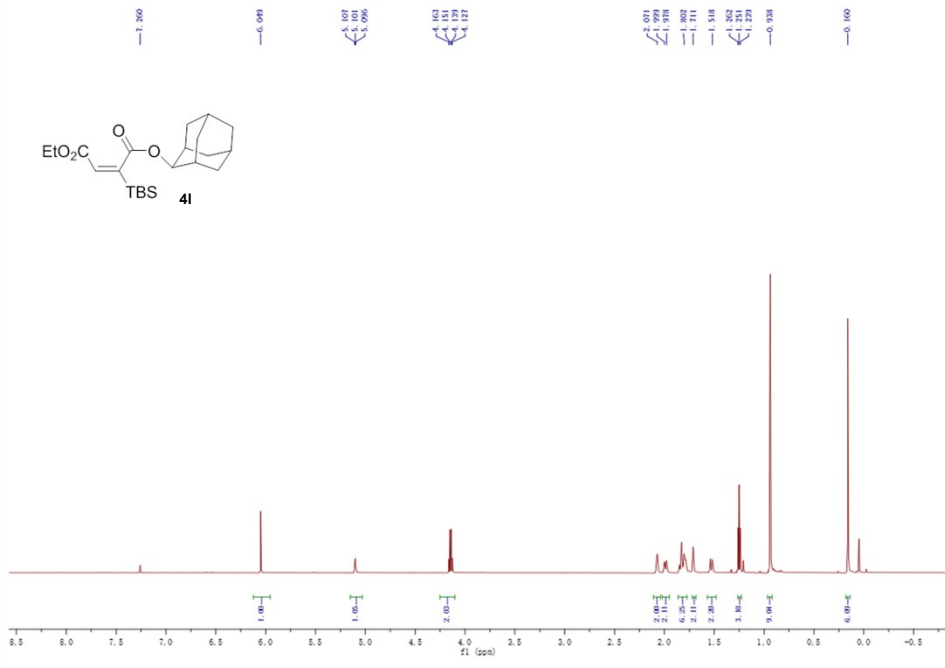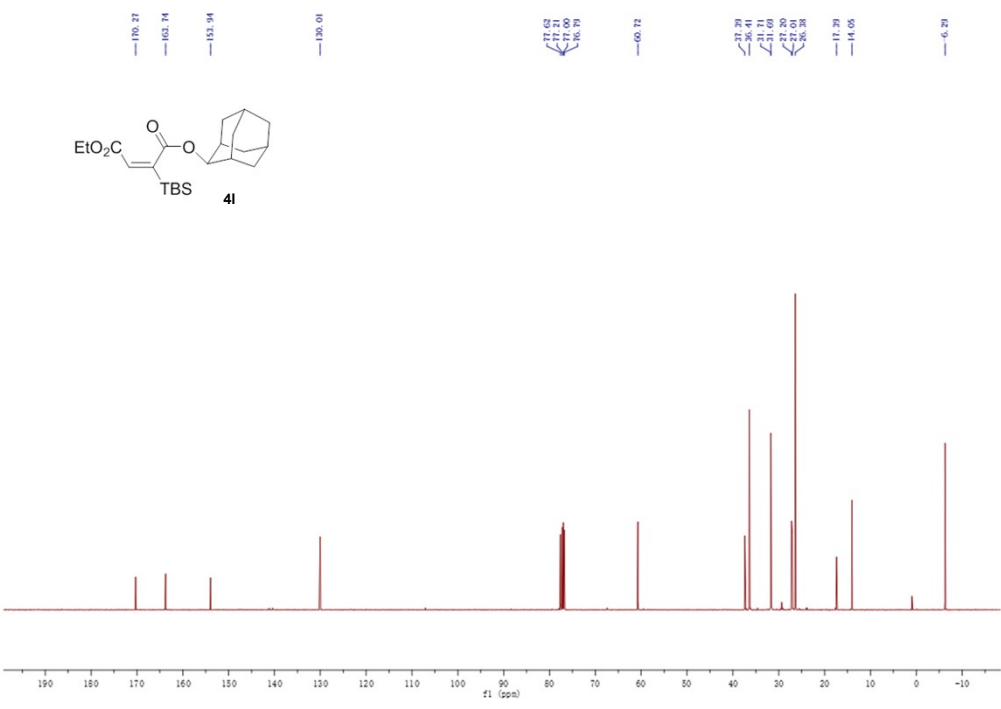







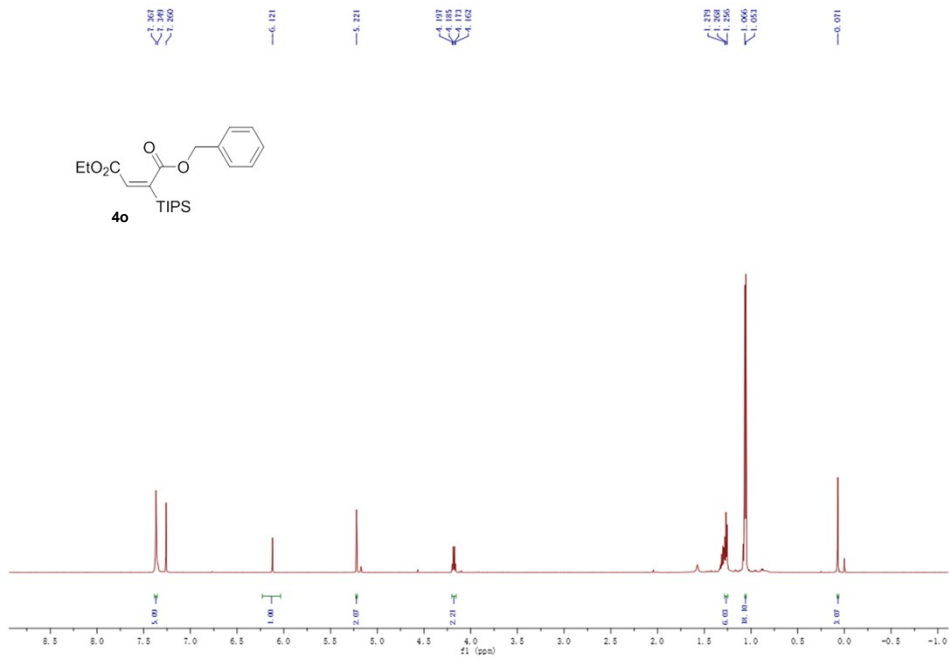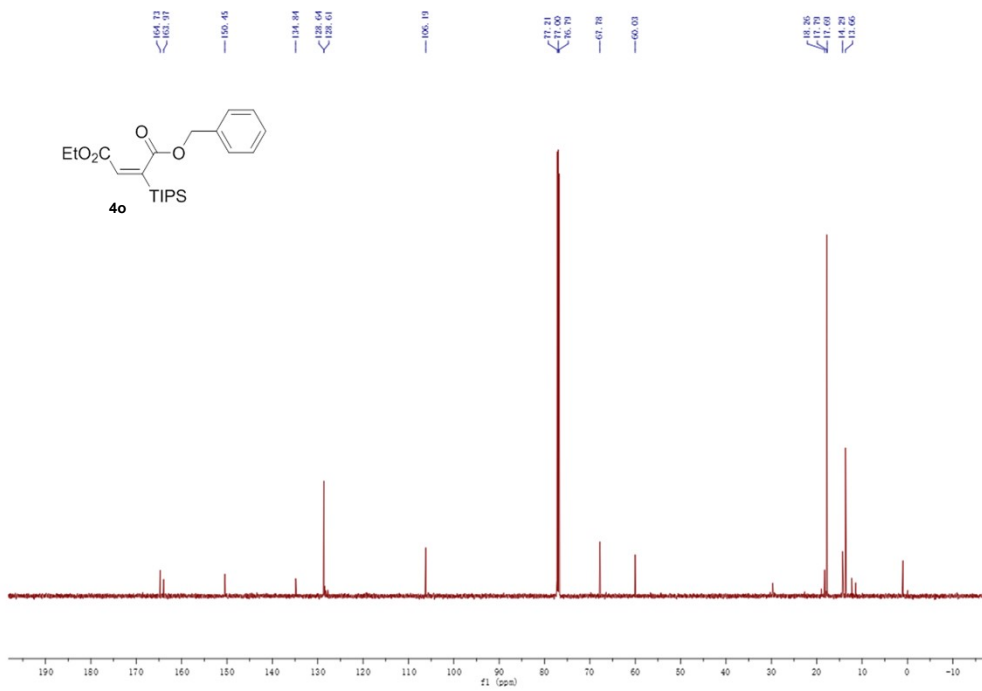

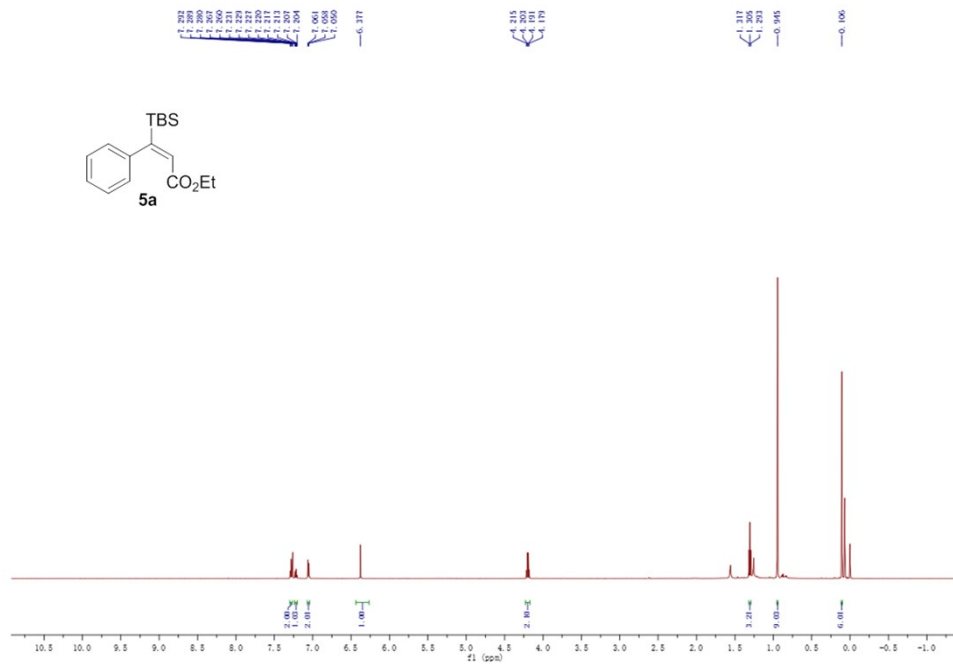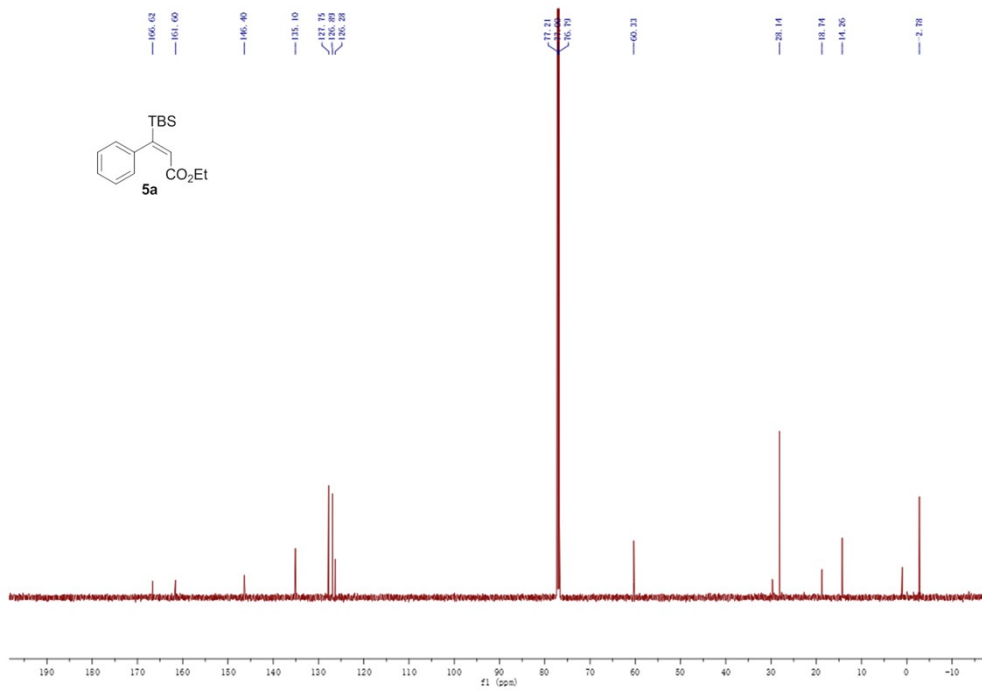



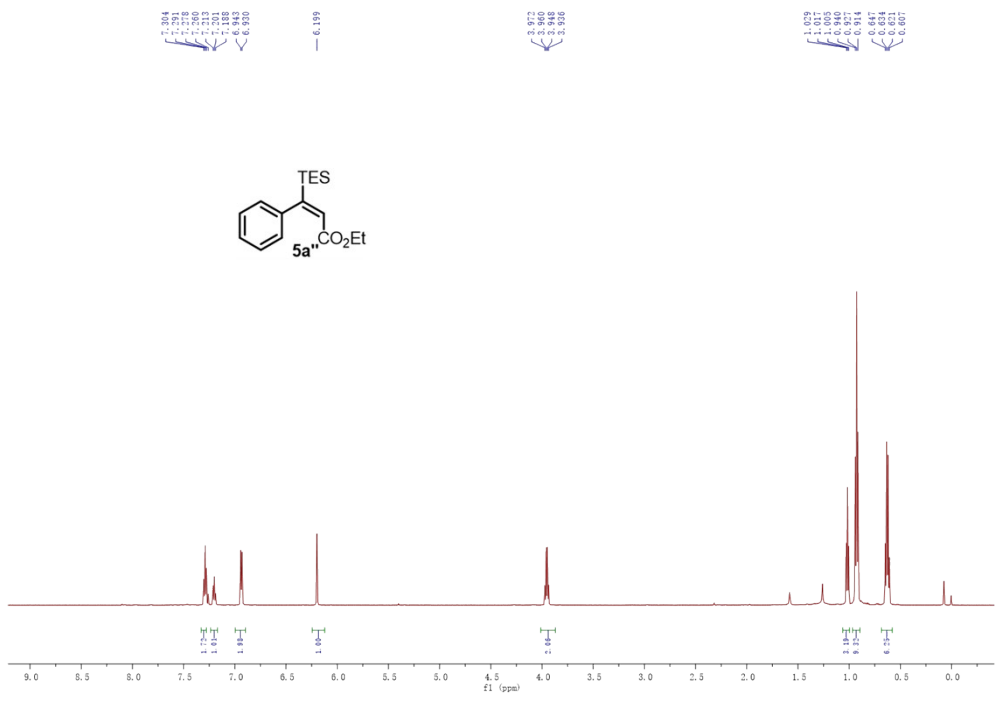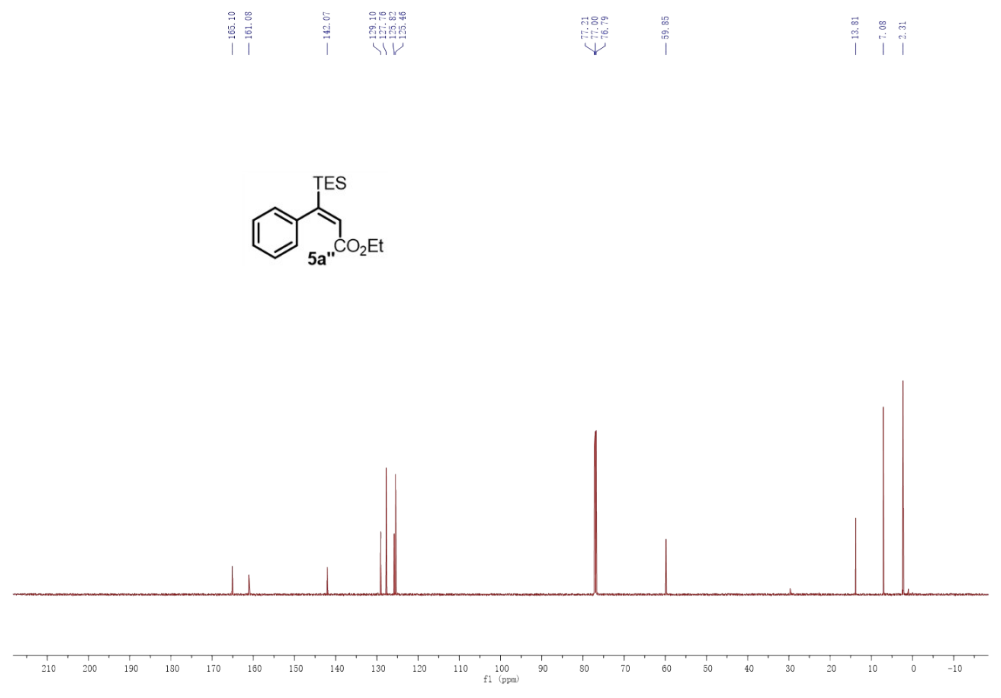

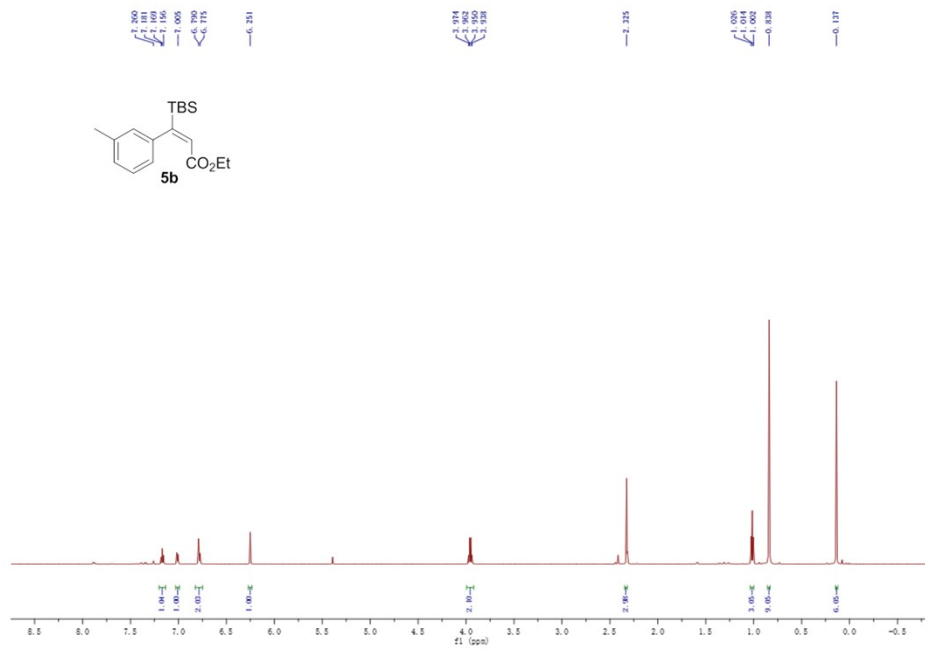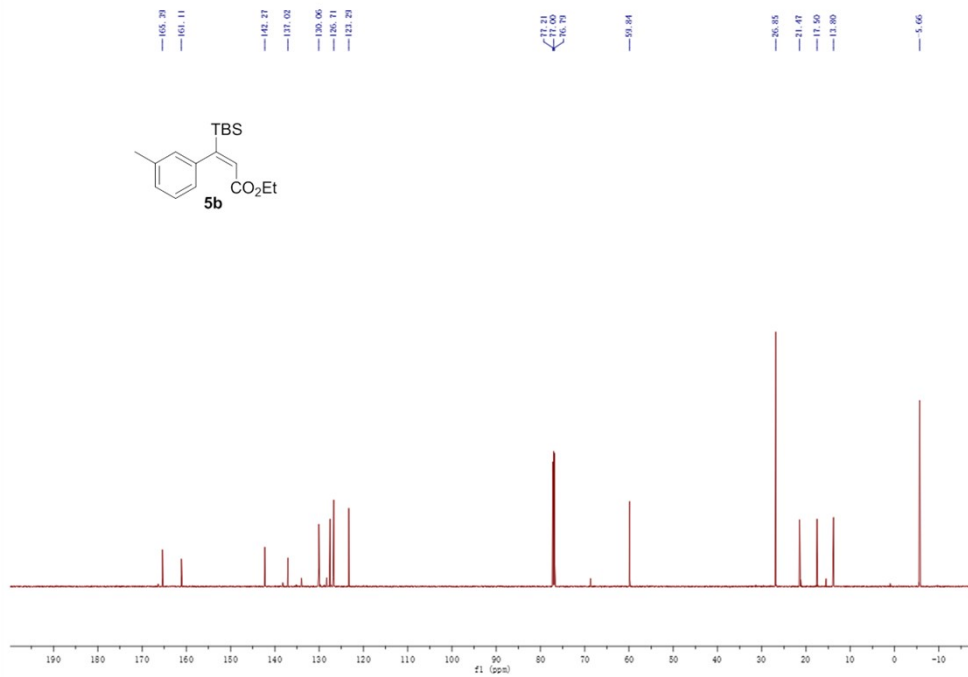

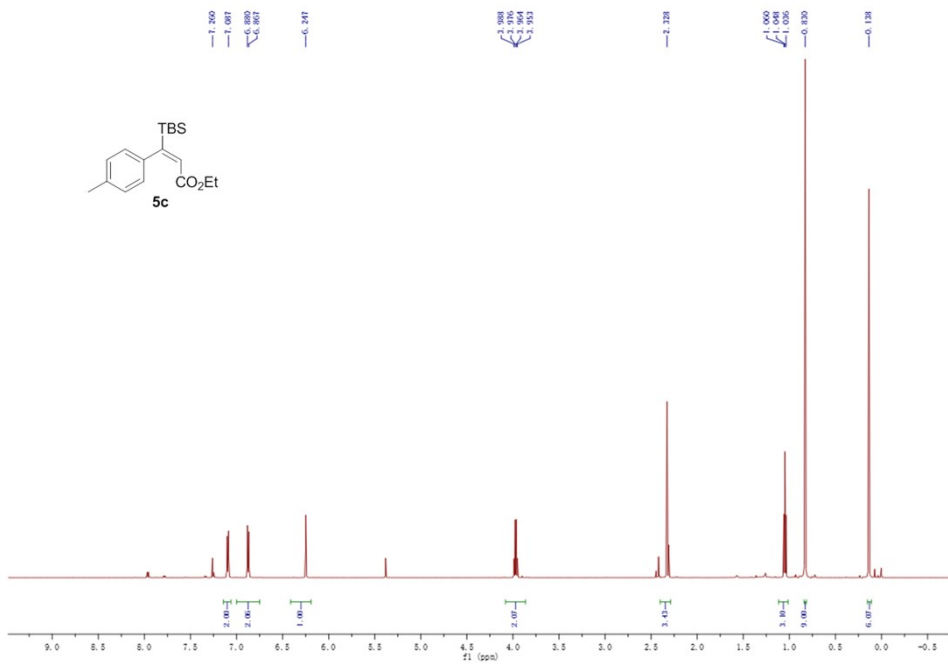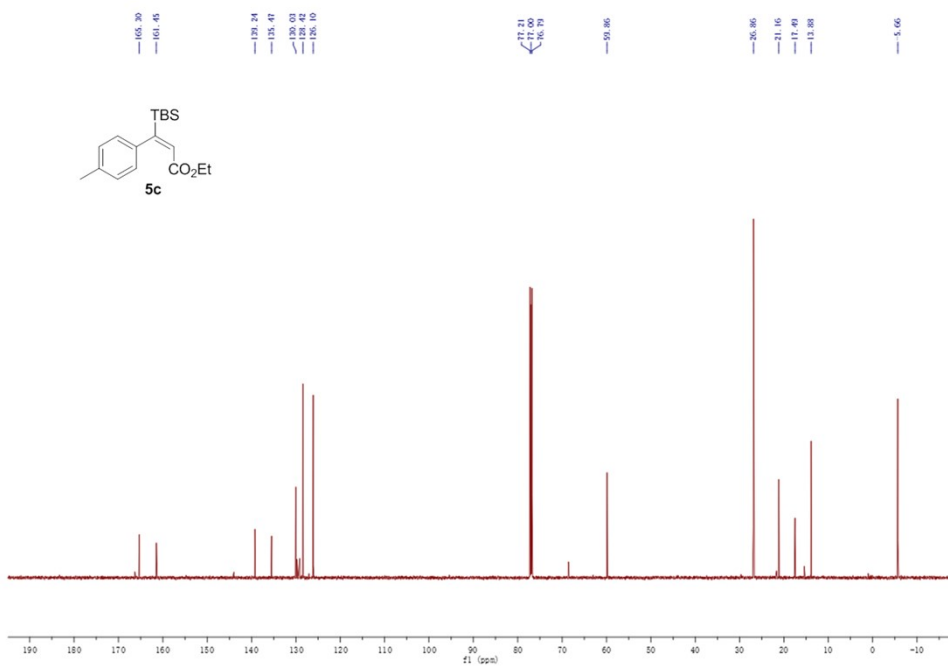

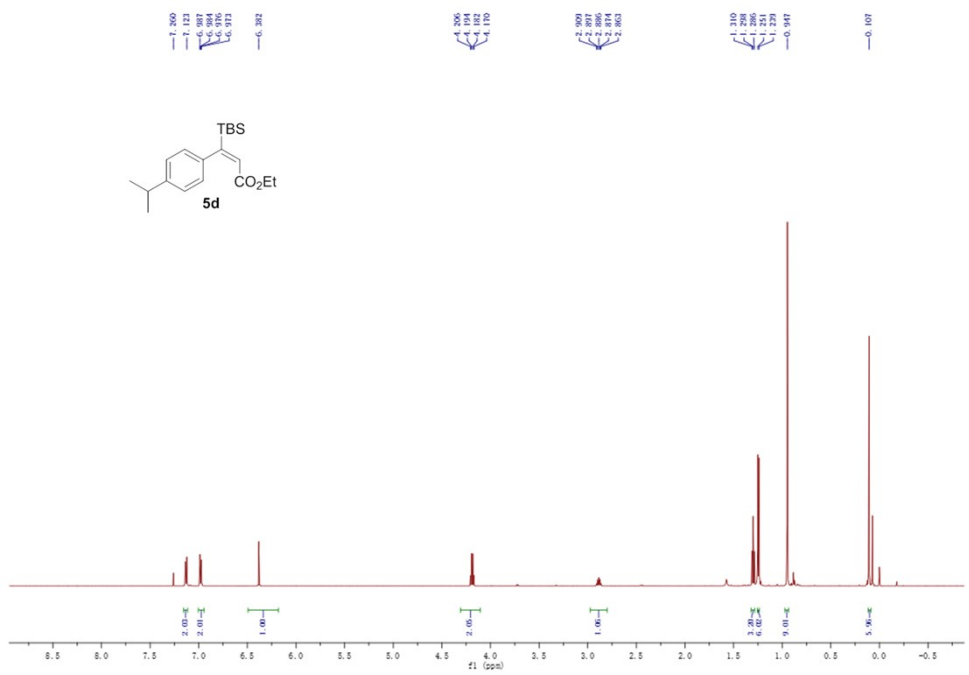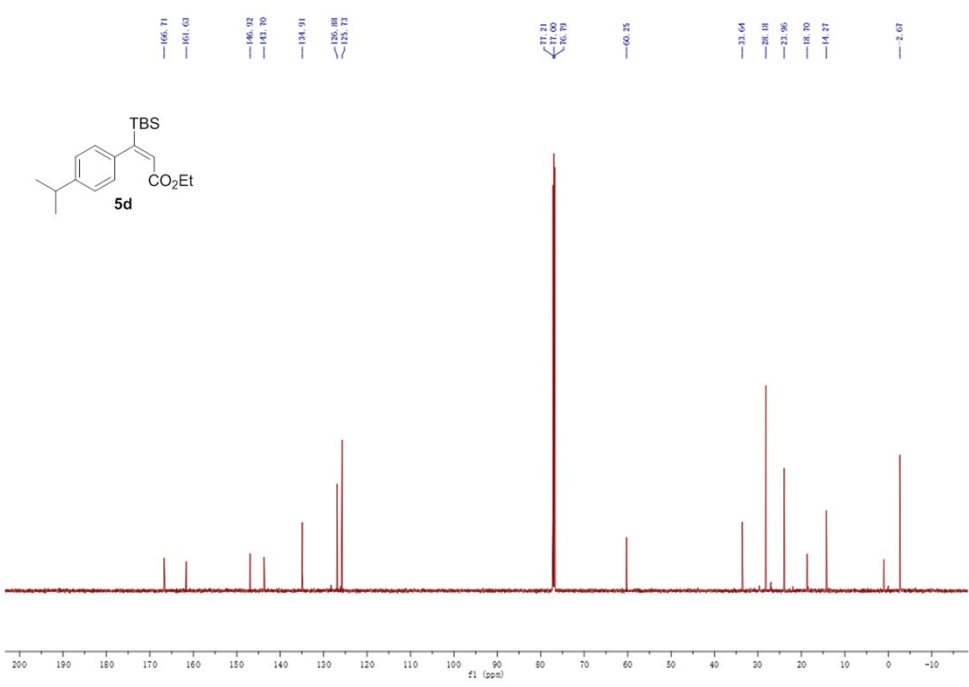

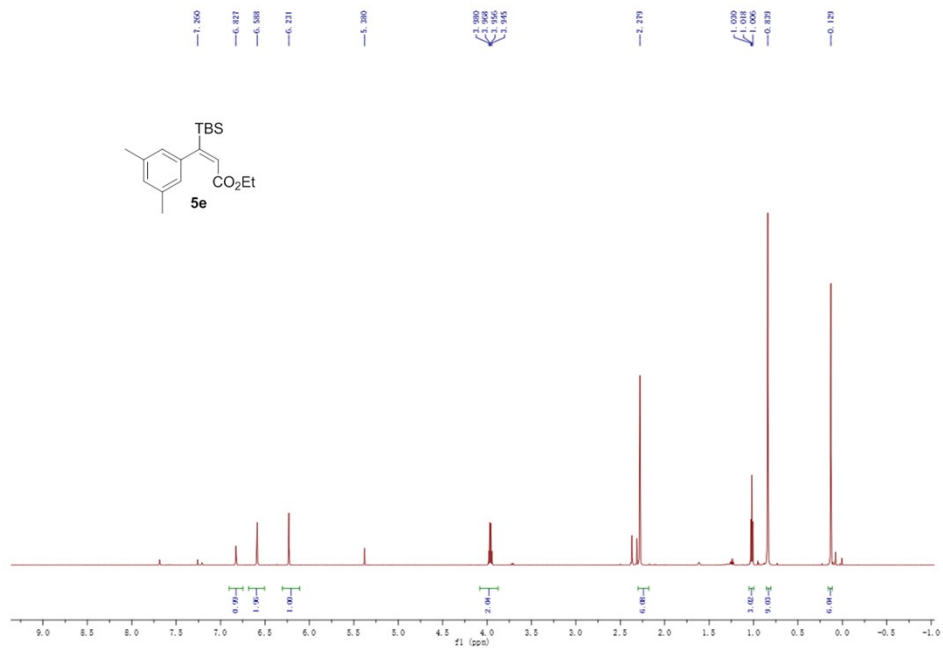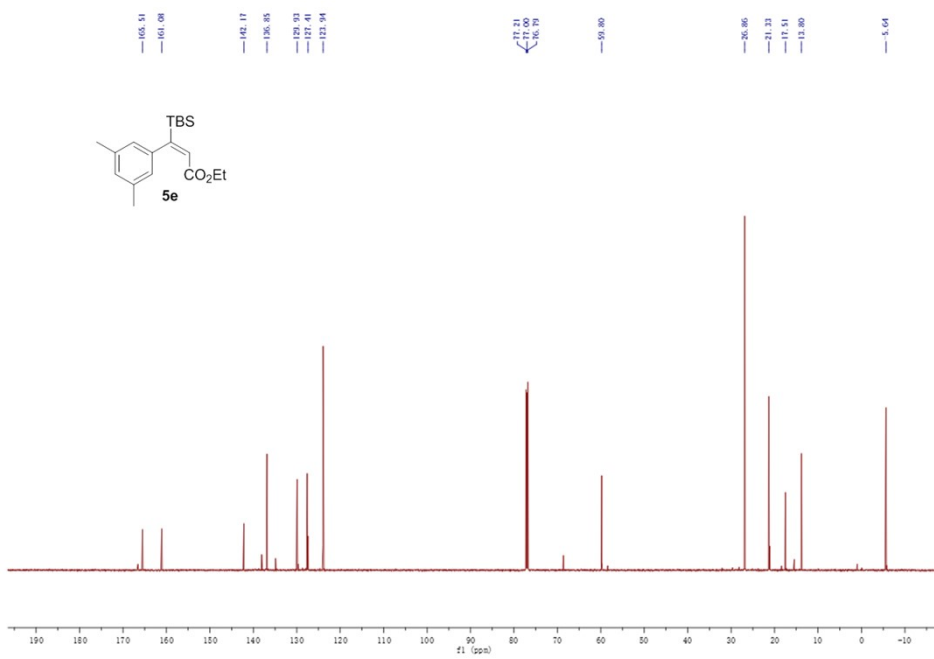





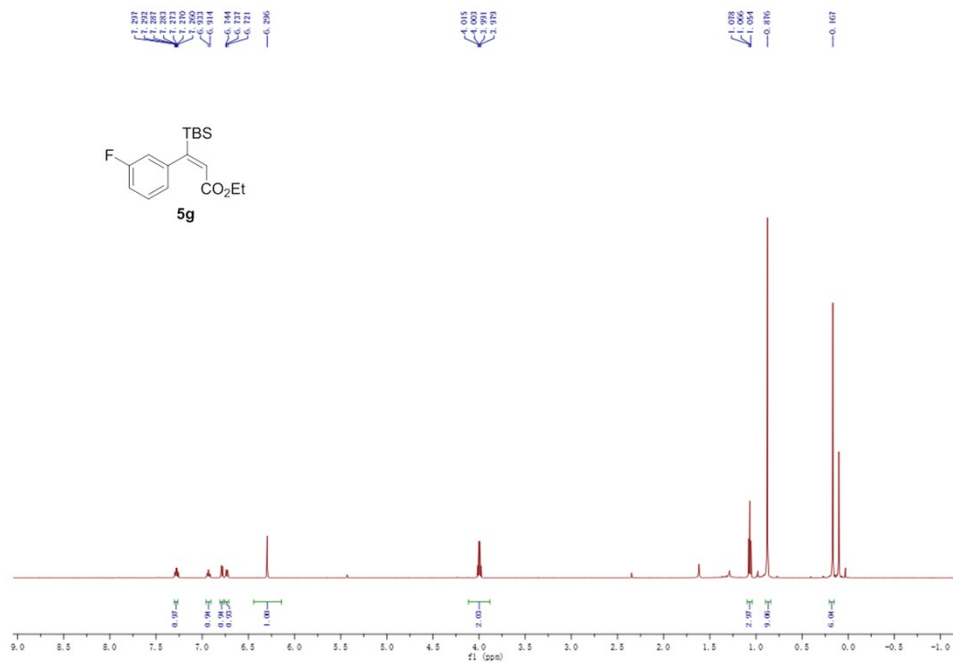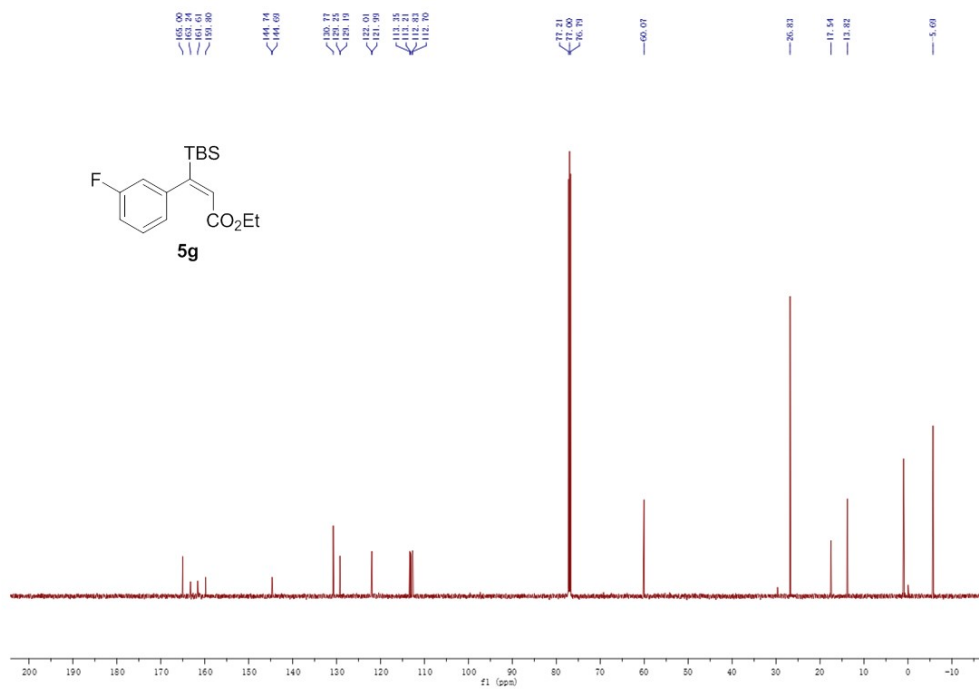

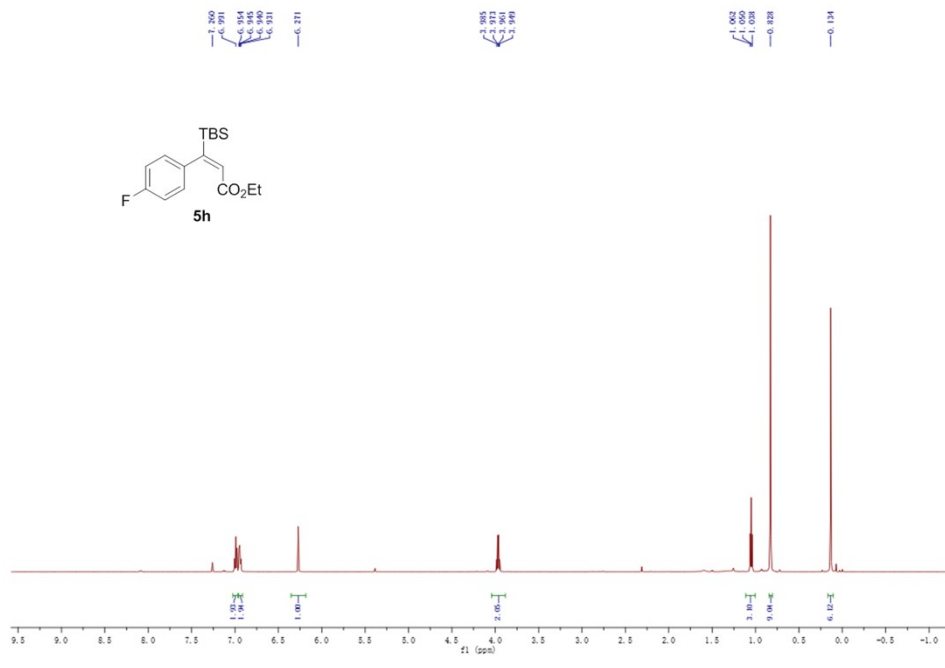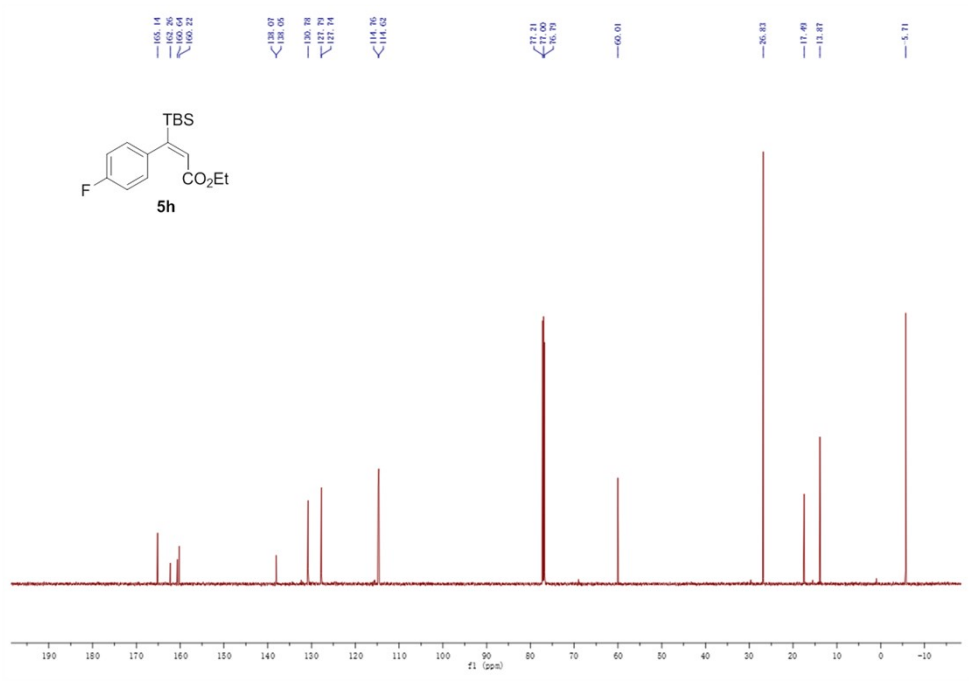

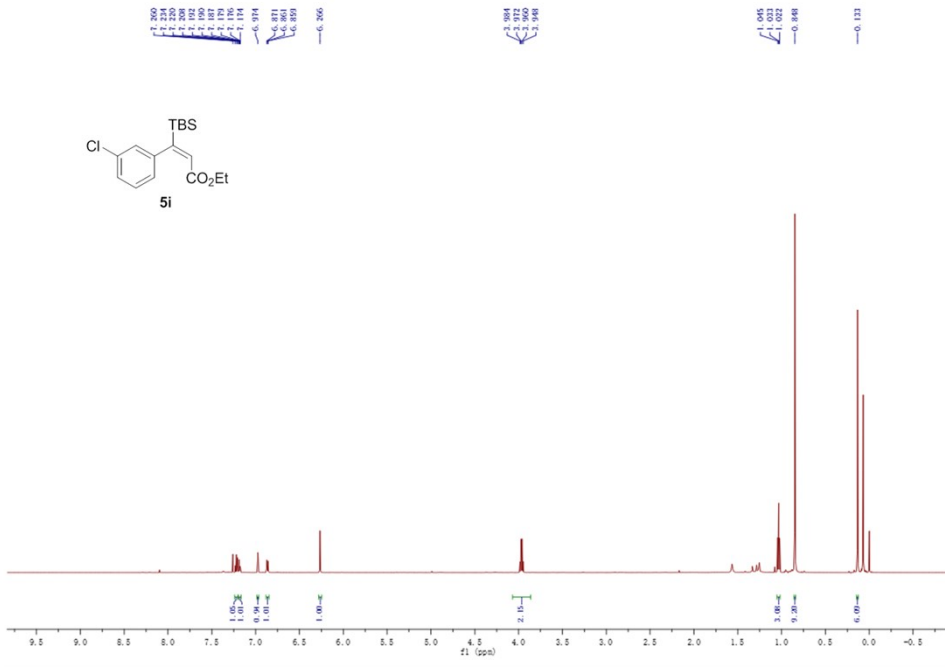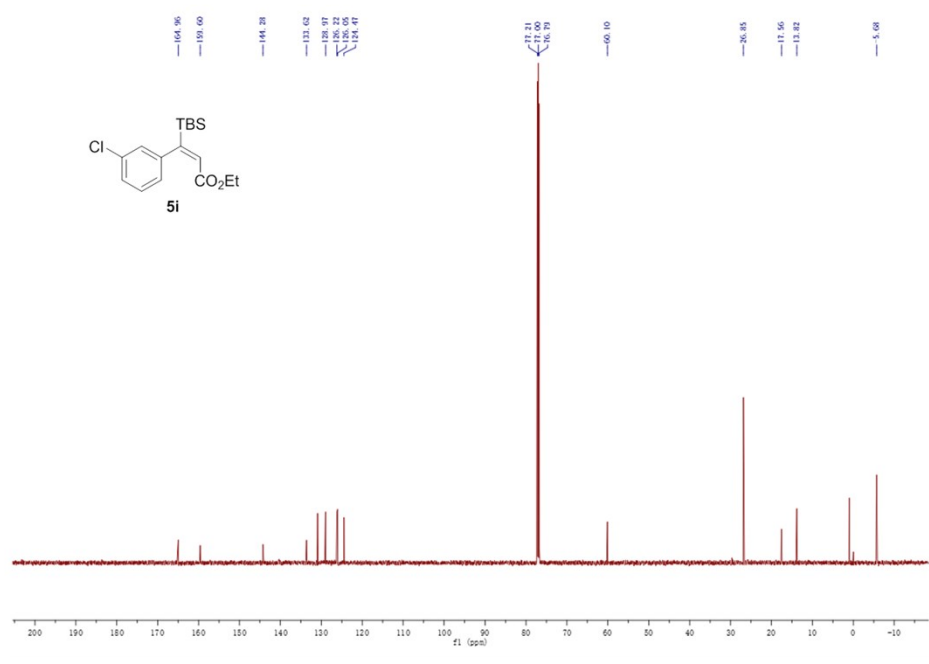

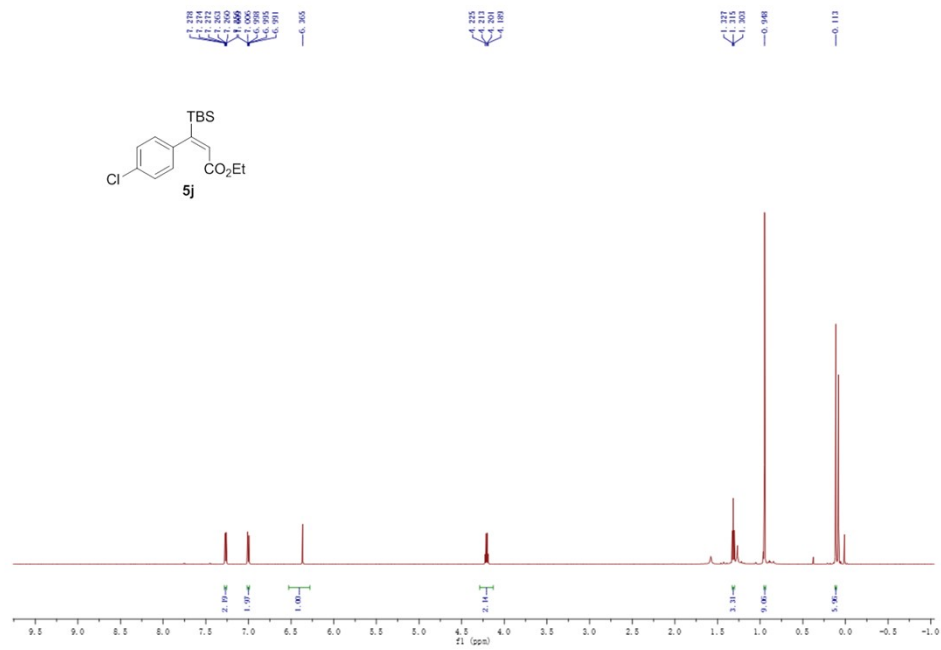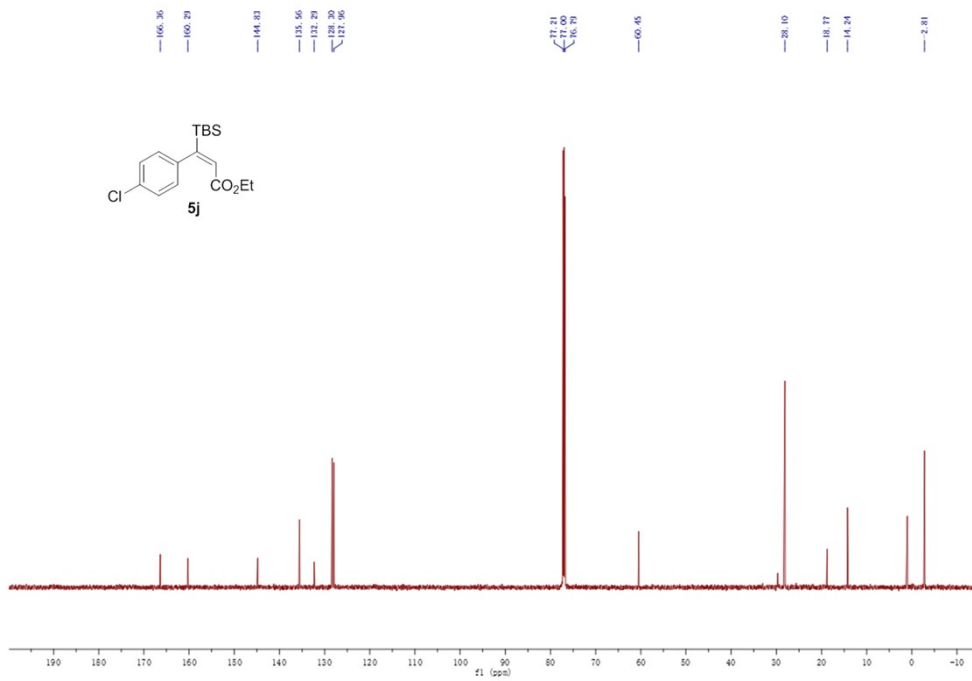

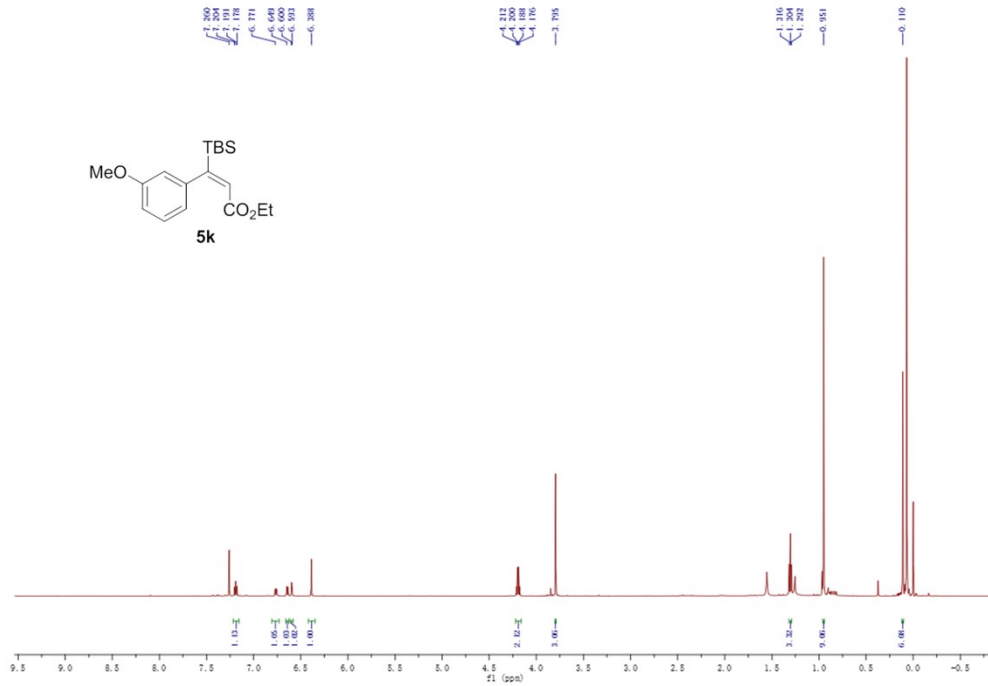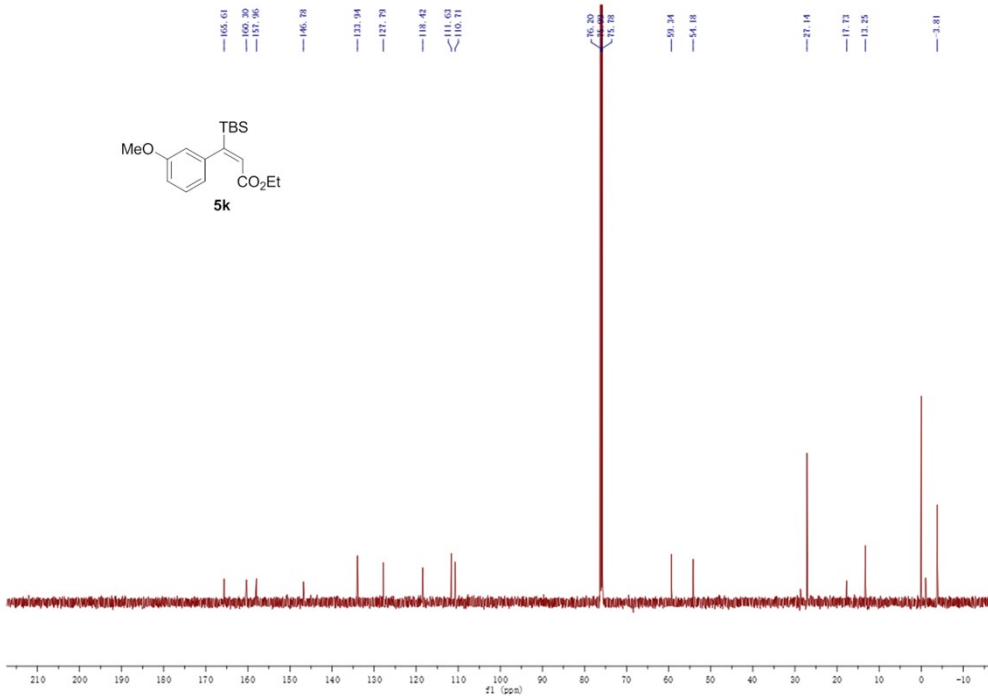

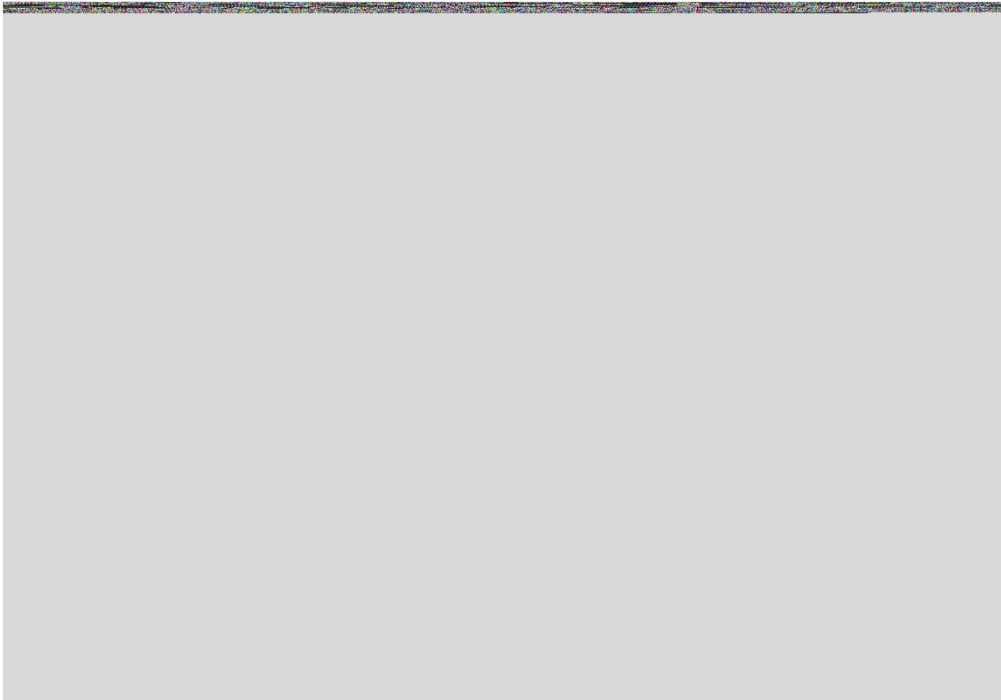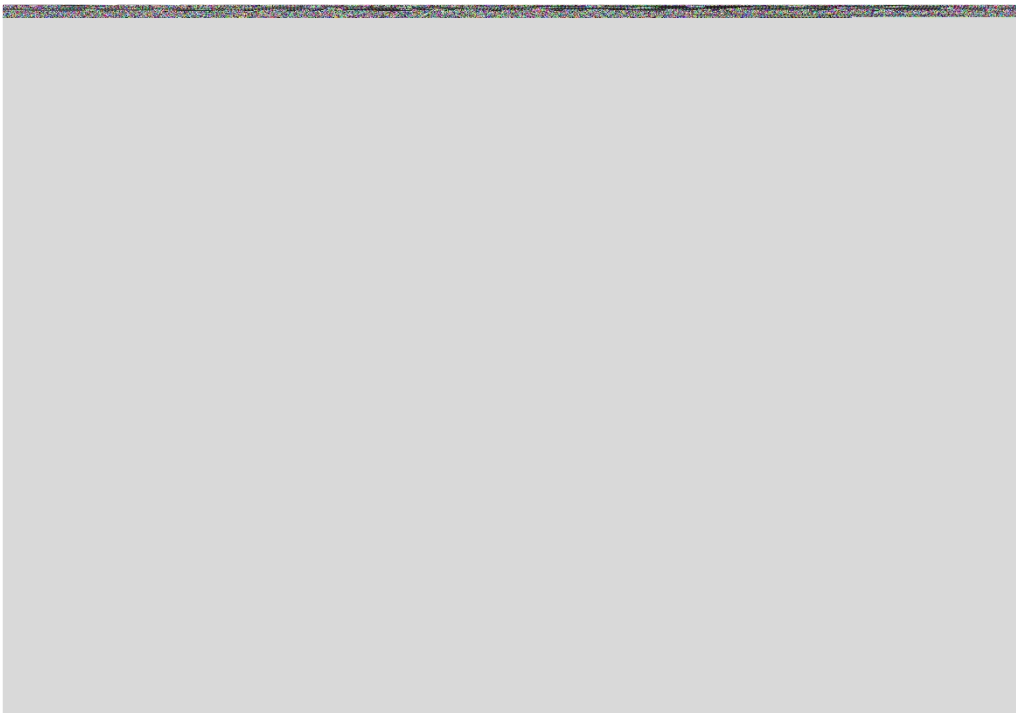

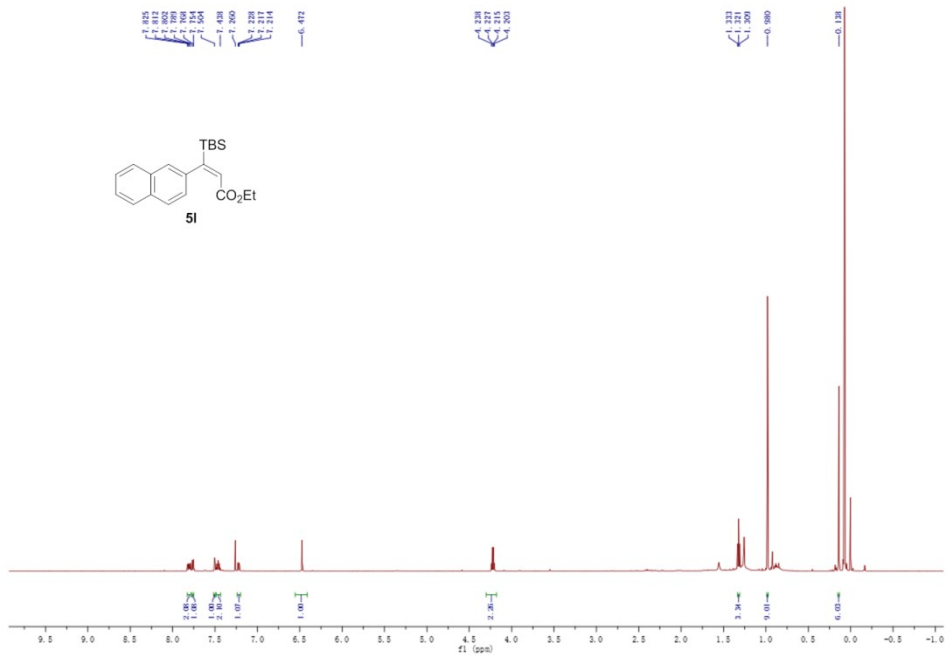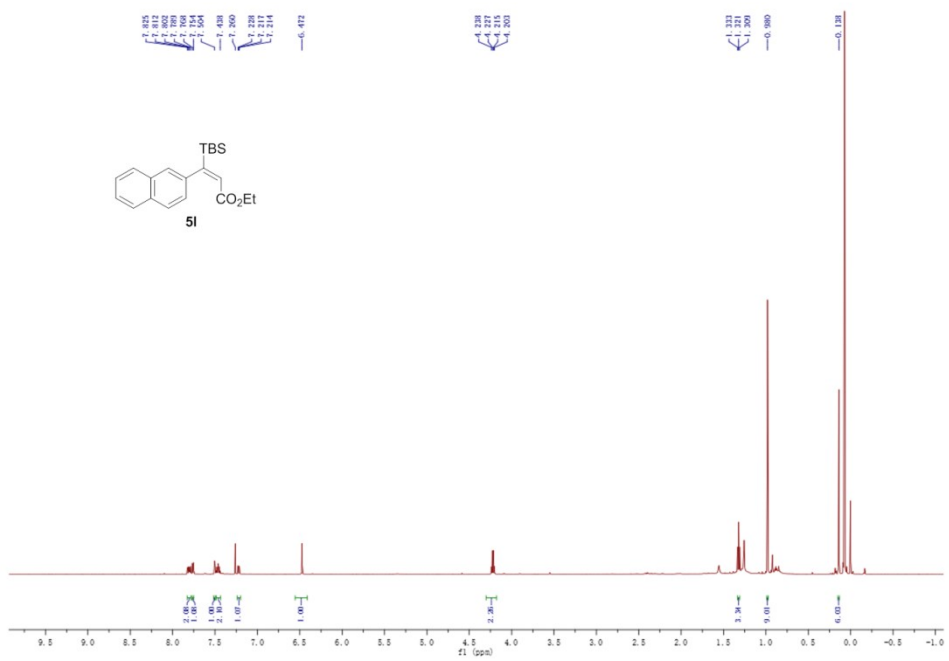



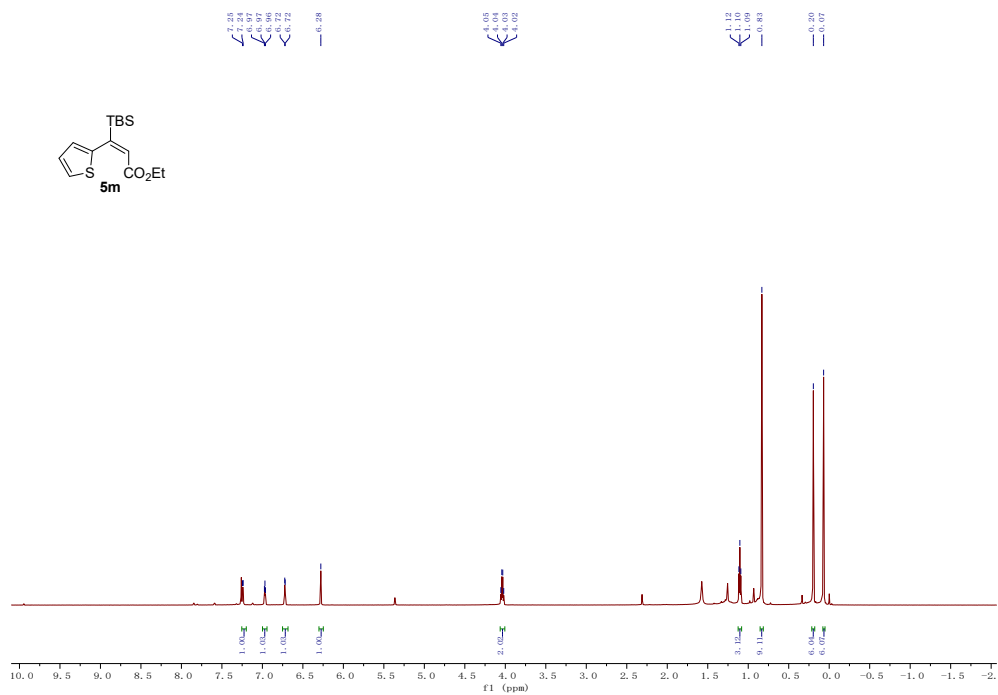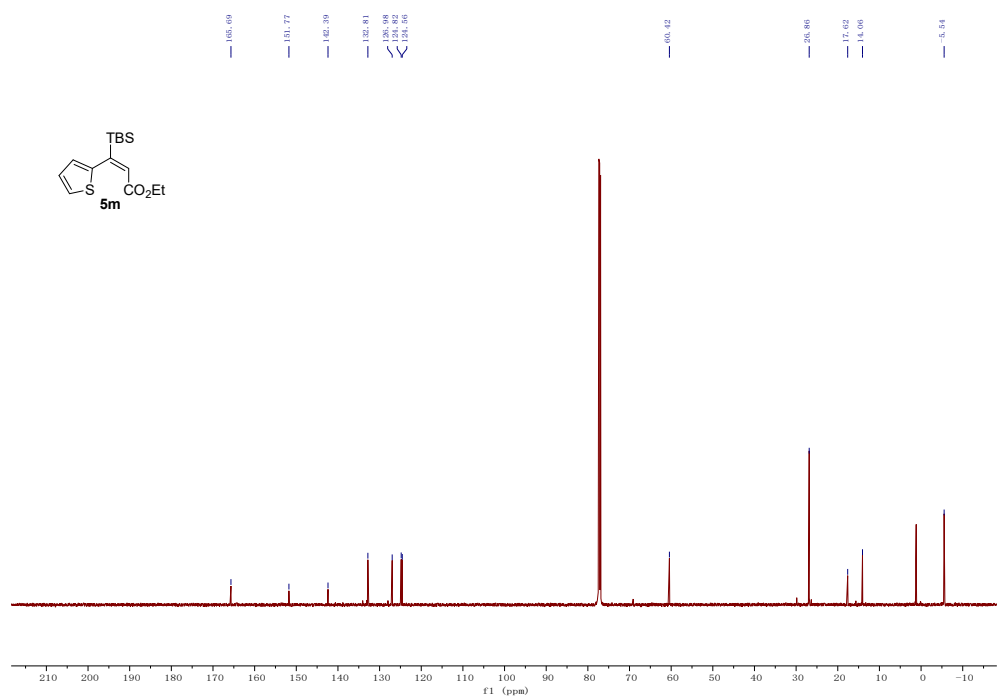



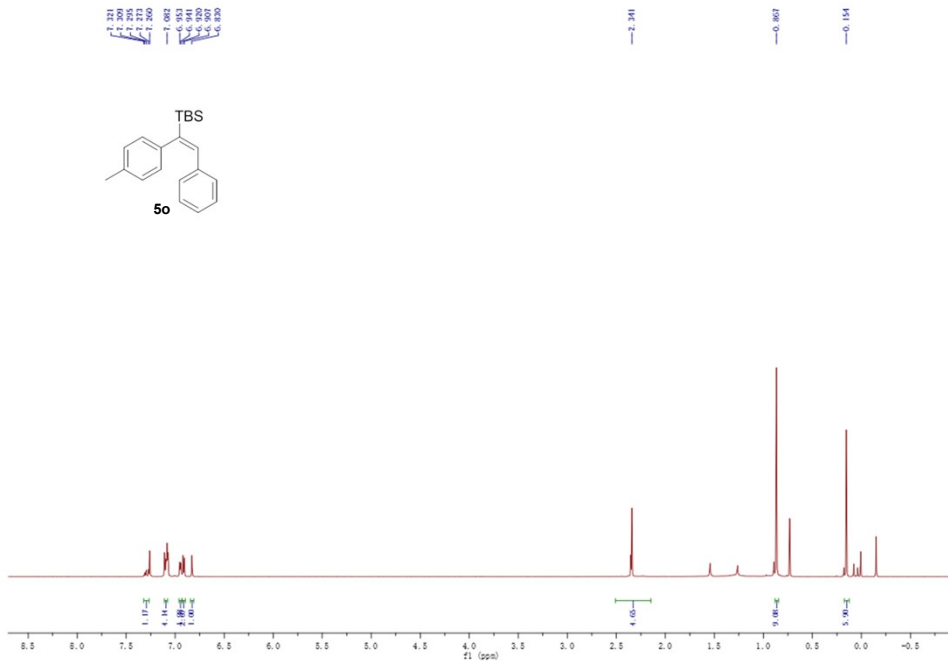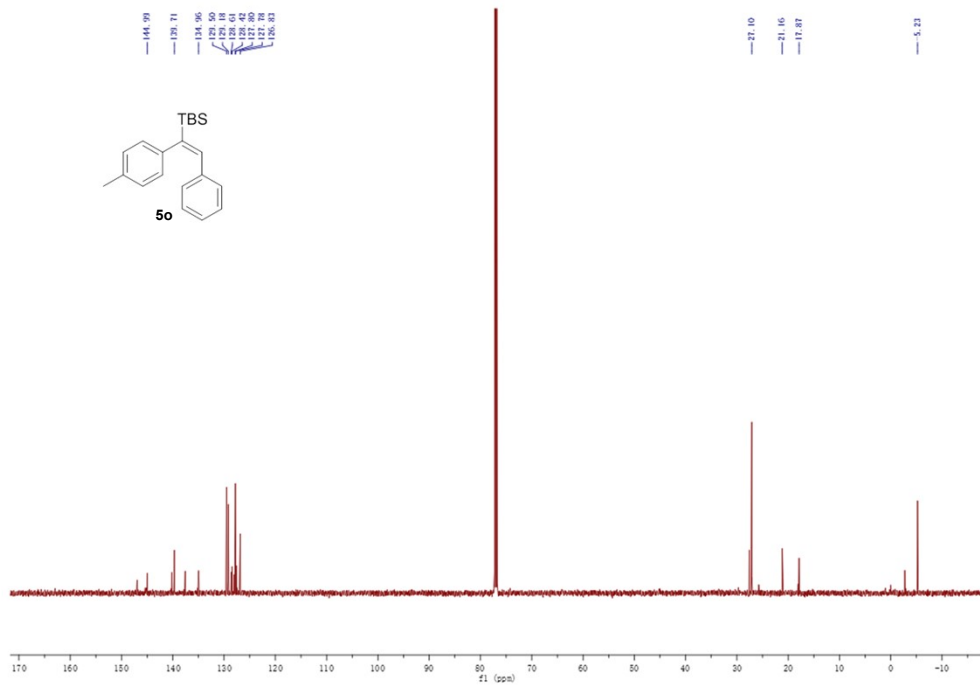

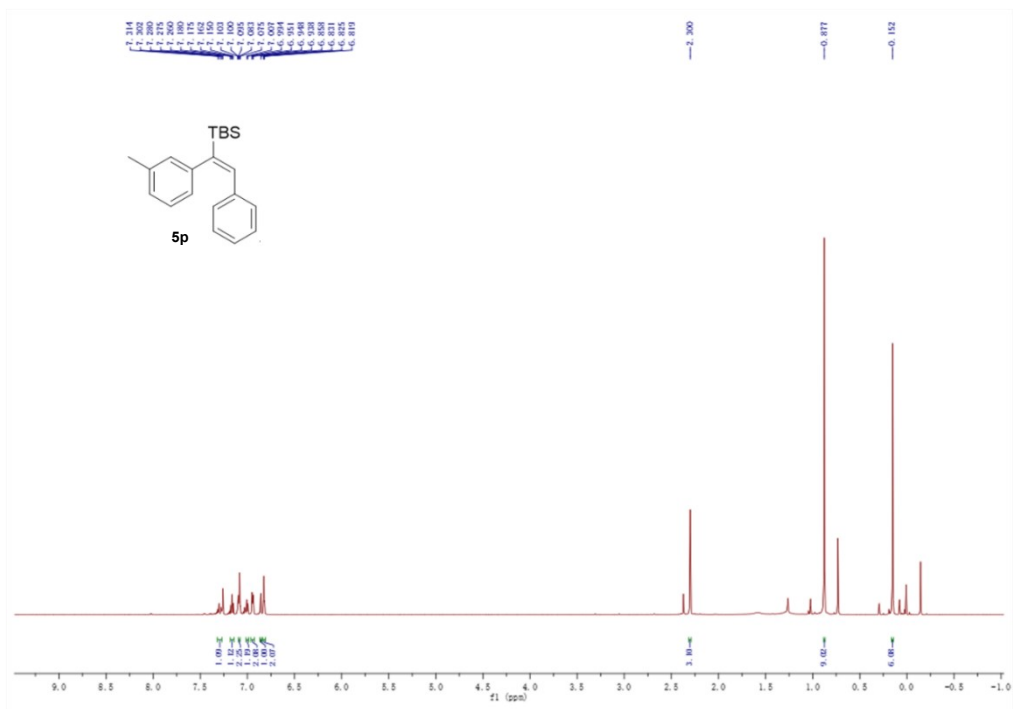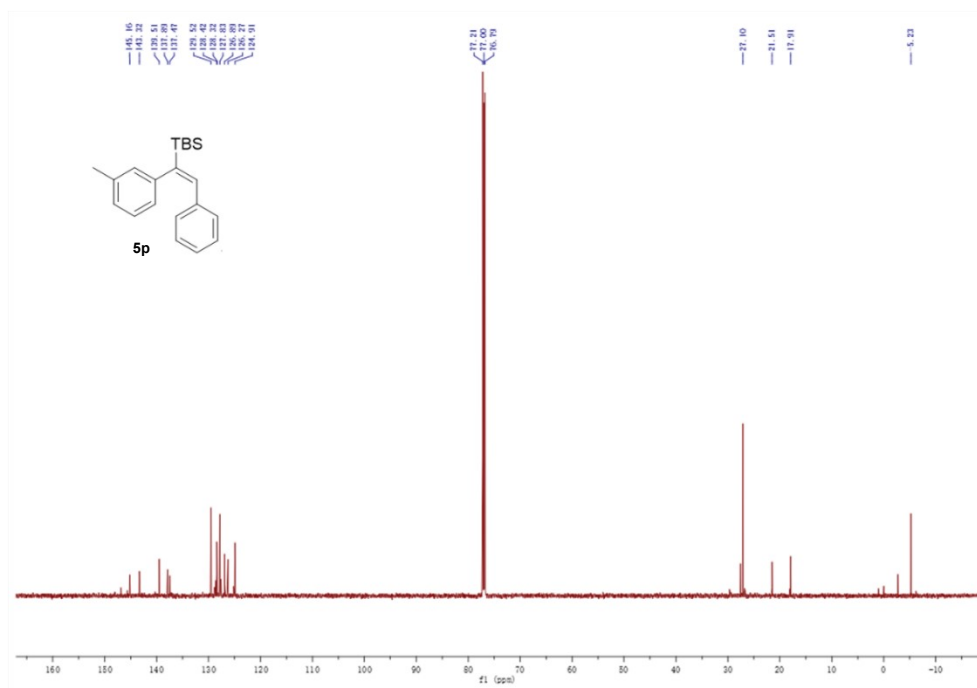



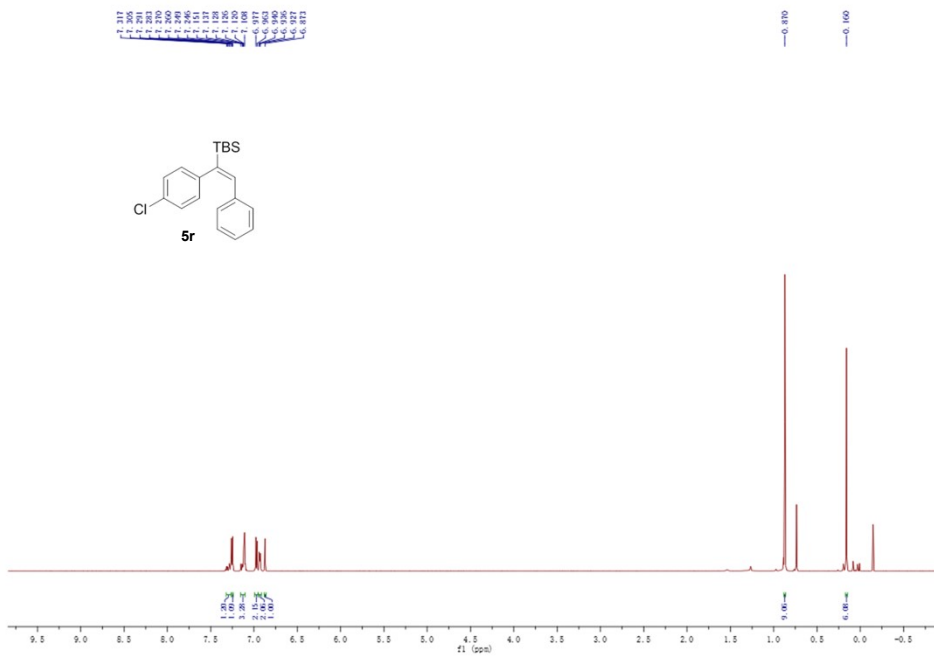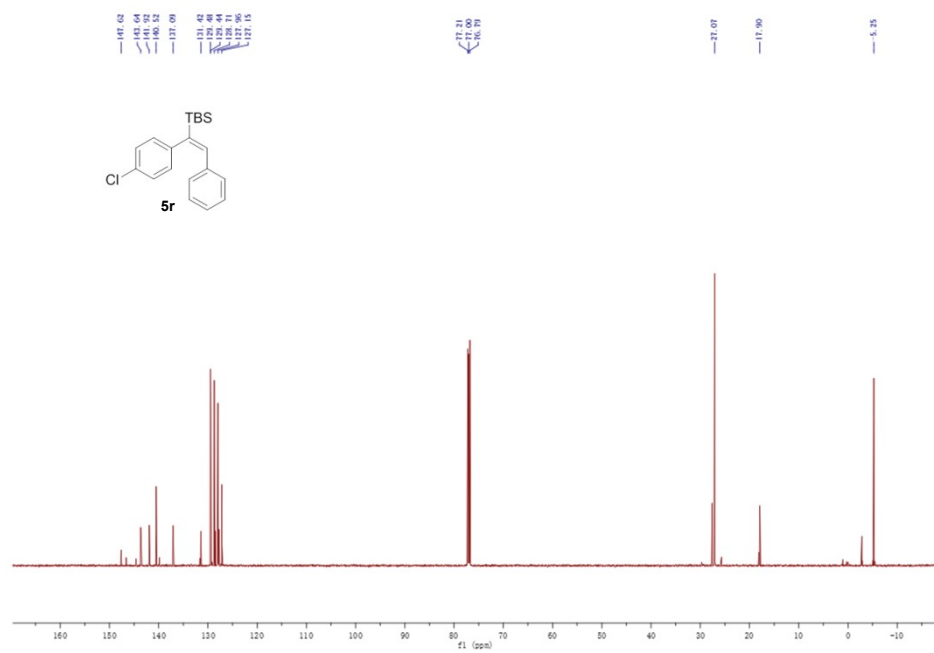

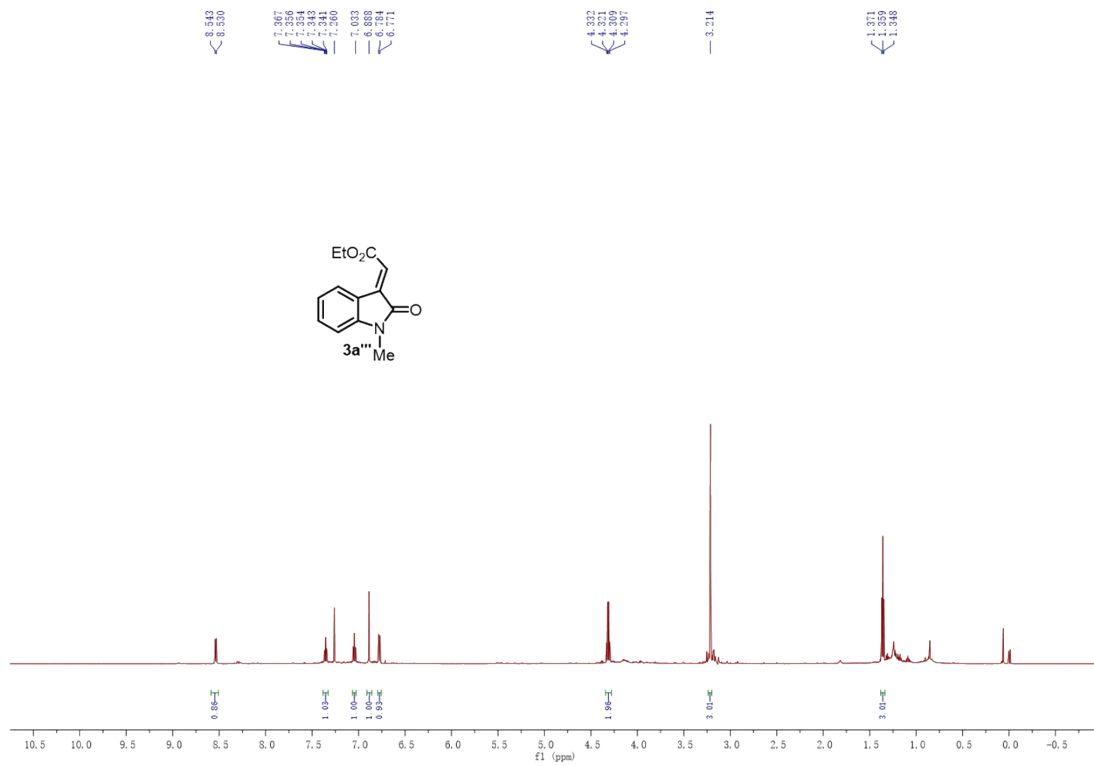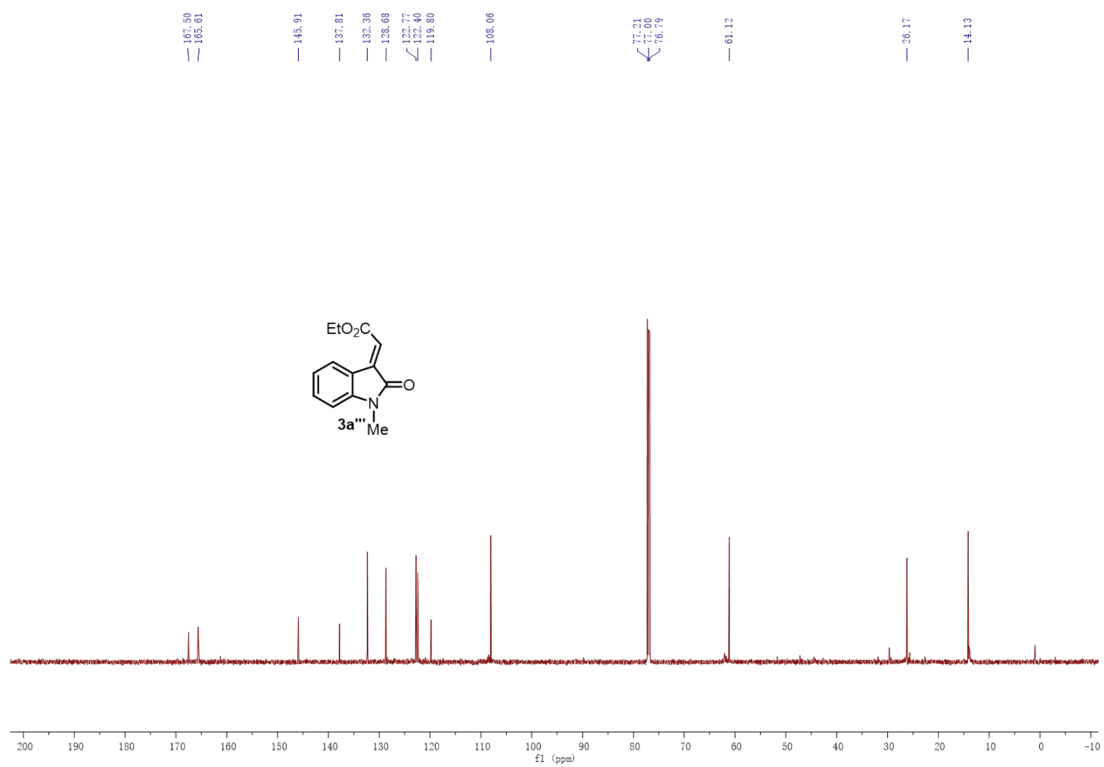





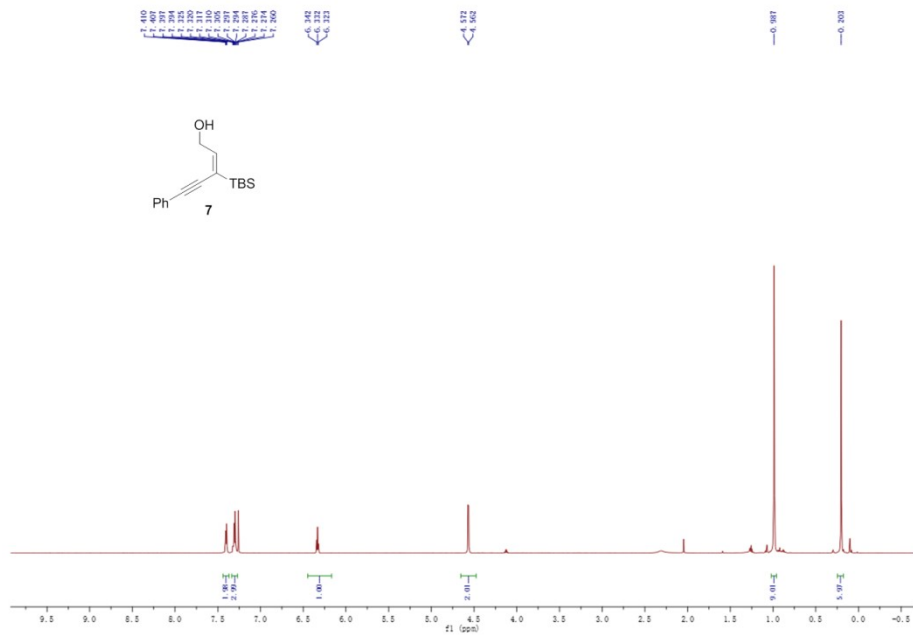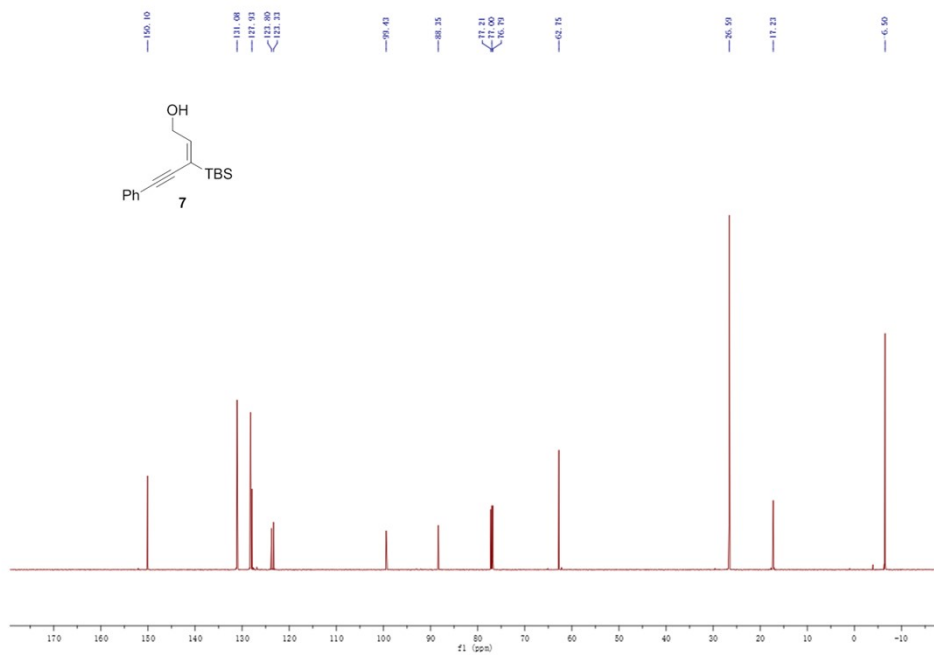

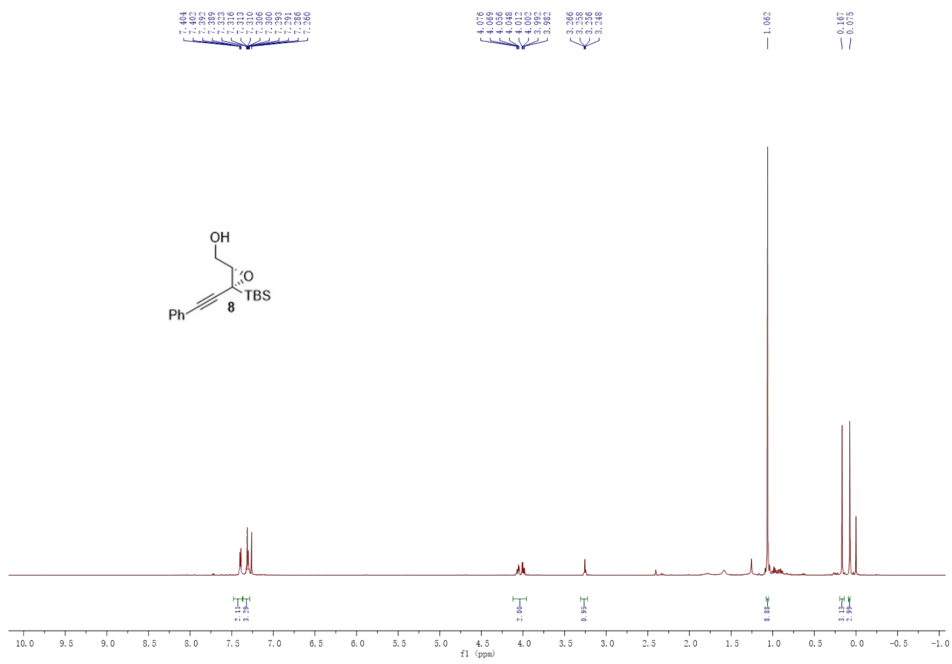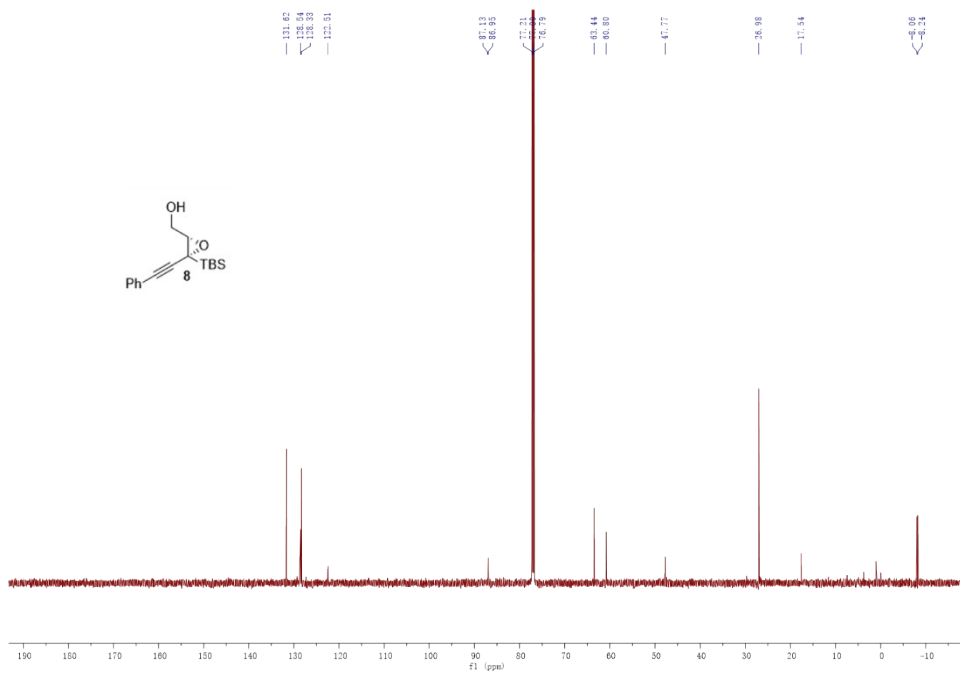

Supplement: d4qo01528b1.pdf [file d4qo01528b1.pdf]
